# Supplementary material
Source: HighWire-hosted journal article supplement (https://dmd.aspetjournals.org/highwire/filestream/72048/field_highwire_adjunct_files/0/Supplemental_82966_revised_corrected.xlsx)
Supplement: Supplemental_82966_revised_corrected.xlsx [file Supplemental_82966_revised_corrected.xlsx]

## Sheet: Data_sheet
Name	CAS #	SMILES	human VDss (L/kg)	human CL (mL/min/kg)	fraction unbound in plasma (fu)	MRT (h)	terminal t1/2 (h)	Reference	Comments	Notes	Year of first disclosure	MW	HBA	HBD	TPSA_NO	RotBondCount	moka_ionState7.4	MoKa.LogP	MoKa.LogD7.4
α-hANP	85637-73-6	N1[C@H](C(=O)N[C@H](C(=O)N[C@H](C(=O)N[C@H](C(=O)N[C@H](C(=O)N[C@H](C(=O)O)Cc2ccc(cc2)O)CCCNC(=N)N)Cc2ccccc2)CO)CC(=O)N)CSSC[C@H](NC(=O)[C@@H](NC(=O)[C@@H](NC(=O)[C@@H](NC(=O)[C@@H](NC(=O)[C@@H](NC(=O)[C@@H](N)CO)CC(C)C)CCCNC(=N)N)CCCNC(=N)N)CO)CO)C(=O)N[C@H](C(=O)NCC(=O)NCC(=O)N[C@H](C(=O)N[C@H](C(=O)N[C@H](C(=O)N[C@H](C(=O)N[C@H](C(=O)NCC(=O)N[C@@H](C)C(=O)N[C@H](C(=O)N[C@H](C(=O)NCC(=O)N[C@H](…	0.2	25.4		0.13	0.22	Nakao, K.; Sugawara, A.; Morii, N.; Sakamoto, M.; Yamada, T.; Itoh, H.; Shiono, S.; Saito, Y.; Nishimura, K.; Ban, T.; Kangawa, K.; Matsuo, H.; Imura, H. The pharmacokinetics of α-​human atrial natriuretic polypeptide in healthy subjects. Eur. J. Clin. Pharmacol., 1986, 31, 101-103.	α-Human Atrial Natriuretic Peptide. MRT calculated from reported VDss and clearance. N=6, 100 ug of synthetic peptide, bolus.		1982	3080.44	84	53	1403.4	75	cationic	-9	-9
(-)dOTC	160707-69-7	c1cn(c(=O)nc1N)[C@H]2CO[C@H](S2)CO	1.18	3		6.5	19.2	PATRICK F. SMITH, ALAN FORREST, CHARLES H. BALLOW, DAVID E. MARTIN,AND LOUISE PROULX. Absolute Bioavailability and Disposition of (-) and (+) 2'-Deoxy-3'-Oxa-4'-Thiocytidine (dOTC) following Single Intravenousand Oral Doses of Racemic dOTC in Humans. ANTIMICROBIAL AGENTS AND CHEMOTHERAPY,2000, 44,1609–1615.	Dosed as 100 mg of racemate. (-) form called apricitabine or (-) BCH10652. Data for (+) form reported as well. MRT from VDss and clearance.		1994	229.26	6	2	90.4	2	neutral	-1.9	-1.9
(+)dOTC	160707-68-6	c1cn(c(=O)nc1N)[C@@H]2CO[C@@H](S2)CO	0.84	3.9		3.6	8.92	PATRICK F. SMITH, ALAN FORREST, CHARLES H. BALLOW, DAVID E. MARTIN,AND LOUISE PROULX. Absolute Bioavailability and Disposition of (-) and (+) 2'-Deoxy-3'-Oxa-4'-Thiocytidine (dOTC) following Single Intravenousand Oral Doses of Racemic dOTC in Humans. ANTIMICROBIAL AGENTS AND CHEMOTHERAPY, 2000, 44,1609–1615.	Dosed as 100 mg of racemate. (-) form called apricitabine or (-) BCH10652. The (+) form is called (+)-BCH 10652; (+)-DOTC; BCH 10619. Data for (-) form reported as well. MRT from VDss and clearance.		1994	229.26	6	2	90.4	2	neutral	-1.9	-1.9
1,3-DCQA	19870-46-3	O[C@@H]1C[C@@](C[C@@H](OC(=O)\C=C\c2ccc(O)c(O)c2)[C@@H]1O)(OC(=O)\C=C\c3ccc(O)c(O)c3)C(=O)O	0.79	8.7		1.5	1.37	Wen-Zheng Ju,Yang Zhao,Fang Liu,Ting Wua,Jun Zhang,Shi-Jia Liu,Lin gZhou,Guo-Liang Dai,Ning-Ning Xiong,Zhu-Yuan Fang. Clinical tolerability and pharmacokinetics of Erigerontis hydroxybenzene injection: Results of a randomized phase I study in healthy Chinese volunteers. Phytomed. 2015, 22, 319–325	1,3-dicaffeoylquinic acid. Data digitized from plot reported. All from average males/females. 6 vials EH product tested for content via HPLC. 1.26 mg total dose, N=6, 57 kg average weight. 1 hr infusion. All AUCinf data within 10% of reported.		1964	516.45	12	7	211.3	9	anionic	2.1	-1.6
16-acetyl gitoxin	7242-07-1	C1([C@@H]2[C@@]3([C@@]([C@@H]4[C@@H]([C@@]5(CC[C@@H](O[C@@H]6O[C@@H](C)[C@@H]([C@@H](C6)O)O[C@@H]6O[C@@H](C)[C@@H]([C@@H](C6)O)O[C@@H]6O[C@@H](C)[C@@H]([C@@H](C6)O)O)C[C@@H]5CC4)C)CC3)(C[C@@H]2OC(=O)C)O)C)=CC(=O)OC1	0.78	0.18	0.07	72.3	51.6	Hausten, K.-O. On the Pharmacokinetics of 16-Acetyl-gitoxin and Its Bioavailability from Pengitoxin-Containing Tablet Formulations. Int. J. Pharmacokin. Biopharm. 1986, 14, 357-364.	16-O-acetylgitoxin. N=6, 65.3 kg average weight. 0.5 mg administered iv in 1 minute. MRT calculate from AUC and AUMC in turn calculated from C1, C2 and lamba 1 and 2. VDss then calculated from MRT and clearance reported. Fu reported by the author from own previous work. G. Hiiller, K.-O. Haustein, and D. Murawski. On the plasma-protein binding of 16-acetylgitoxin. Int. J. Clin. Pharmacol. 19:200-…		1960	822.98	15	5	209.1	9	neutral	0.93	0.93
1-Aminocyclopropanecarboxylic Acid	22059-21-8	[H]N([H])C1(CC1)C(=O)O[H]	0.73	1.5		7.8	5.9	Cherkofsky, S.C. (1995) 1-Aminocyclopropylcarboxylic acid: mouse to man interspecies pharmacokinetic comparisons and allometric relationships. J. Pharm. Sci. 84: 1231-1235.			1922	101.1	3	2	63.3	3	zwitterionic	-0.66	-2.4
3,4-DCQA	14534-61-3	C1[C@@](C[C@H]([C@H]([C@@H]1OC(\C=C\c1cc(c(cc1)O)O)=O)OC(\C=C\c1cc(c(cc1)O)O)=O)O)(C(=O)O)O	0.63	34.58		0.3	0.57	Wen-Zheng Ju,Yang Zhao,Fang Liu,Ting Wua,Jun Zhang,Shi-Jia Liu,Lin gZhou,Guo-Liang Dai,Ning-Ning Xiong,Zhu-Yuan Fang. Clinical tolerability and pharmacokinetics of Erigerontis hydroxybenzene injection: Results of a randomized phase I study in healthy Chinese volunteers. Phytomed. 2015, 22, 319–325	3,4-dicaffeoylquinic acid. Data digitized from plot reported. All from average males/females. 6 vials EH product tested for content via HPLC. 20.4 mg total dose, N=6, 57 kg average weight. 1 hr infusion. All AUCinf data within 10% of reported.		1961	516.45	12	7	211.3	9	anionic	2.6	-1
3,5-DCQA	2450-53-5	O[C@@H]1[C@@H](C[C@](O)(C[C@H]1OC(=O)\C=C\c2ccc(O)c(O)c2)C(=O)O)OC(=O)\C=C\c3ccc(O)c(O)c3	4.82	75.81		1.05	3.17	Wen-Zheng Ju,Yang Zhao,Fang Liu,Ting Wua,Jun Zhang,Shi-Jia Liu,Lin gZhou,Guo-Liang Dai,Ning-Ning Xiong,Zhu-Yuan Fang. Clinical tolerability and pharmacokinetics of Erigerontis hydroxybenzene injection: Results of a randomized phase I study in healthy Chinese volunteers. Phytomed. 2015, 22, 319–325	3,5-dicaffeoylquinic acid. Data digitized from plot reported. All from average males/females. 6 vials EH product tested for content via HPLC. 16.44 mg total dose, N=6, 57 kg average weight. 1 hr infusion. All AUCinf data within 10% of reported.		1963	516.45	12	7	211.3	9	anionic	2.6	-1.1
3-O-demethylfortimicin A	74842-47-0	N([C@@H]1[C@@H]([C@@H]([C@@H]([C@@H](O[C@@H]2[C@@H](CC[C@@H](O2)[C@@H](C)N)N)[C@@H]1O)N)O)O)(C)C(CN)=O	0.27	1.37		3.3	2.9	LAWRENCE T. SENNELLO, DAVID S. WILSON, JOANNE AFARIAN, LORRAINE S. HOLTAM, GREGORY NORMAN, DOUGLAS E. ROLLINS, AND KEITH G. TOLMAN. Single-Dose Pharmacokinetics of 3-0-Demethylfortimicin A in Humans after Intravenous and Intramuscular Administration. ANTIMICR. Agents CHEMOTHER.. 1986, 29, 400-404.	N=4 for each dose across 5 doses ( 1-16 mg/kg). VDss calculated from Vc and k12/k21 ratios. MRT from reported clearance and calculated VDss. 72.1 kg median weight reported.		1980	391.46	11	7	203.5	5	cationic	-5.1	-8.2
5-Hydroxymethyl tolterodine	207679-81-0	CC(C)N(CC[C@H](C(C=CC=C1)=C1)C1C(=CC=C(C=1)CO)O)C(C)C	2.41		0.5			PDR reference on fesoterodine. Accessed July 14 2014. http://www.pdr3d.com/detail.php?c=114031#section-12	After oral administration, fesoterodine is well absorbed. Due to rapid and extensive hydrolysis by nonspecific esterases to its active metabolite 5-hydroxymethyl tolterodine, fesoterodine cannot be detected in plasma. Bioavailability of the active metabolite is 52%. VDss from dosing of actual metabolite.		1994	341.49	3	2	43.7	8	cationic	4.1	0.67
852A	532959-63-0	[H]N([H])c1c2c(c3ccccc3n1)n(CCCCN([H])S(C)(=O)=O)c(CC)n2	3.1	7.7		4.7	7.1	Harrison LI, Astry C, Kumar S, et al. Pharmacokinetics of 852A, an imidazoquinoline Toll-like receptor 7-specific agonist, following intravenous, subcutaneous, and oral administrations in humans. J Clin Pharmacol. 2007;47:962–969	Data digitized from plot in figure 2. All calculations almost identical to respective value reported. N = 6, 70 kg average weight assumed, 2 mg dose. 10'' bolus. VDss = 3.1 L/kg, Cl = 7.7 mL/min/kg, MRT = 4.7 h, t1/2 = 7.1 h. Compound also reported as 3M-001		2003	361.46	7	2	102.9	8	cationic	2.3	1.8
Abacavir	136470-78-5	Nc1nc(NC2CC2)c3ncn([C@@H]4C[C@H](CO)C=C4)c3n1	0.84	13	0.5	1.1	1	Chittick GE, Gillotin C, McDowell JA, Lou Y, Edwards KD, Prince WT, and Stein DS. (1999) Abacavir: absolute bioavailability, bioequivalence of three oral formulations, and effect of food. Pharmacotherapy 19: 932-942. Ziagen Product Label.			1991	286.33	7	3	101.9	4	neutral	0.99	0.99
Abanoquil	90402-40-7	COc1cc2CCN(Cc2cc1OC)c3cc(N)c4cc(OC)c(OC)cc4n3	6.3	14		7.6	5.9	Schafers RF, Elliott HL, Meredith PA, Miller SHK, and Reid JL (1991) Studies with abanoquil (UK-52,046) a novel quinoline α1-adrenoceptor antagonist: II. Duration of action, pharmacokinetics and concentration-effect relationships in normotensive subjects. Br. J. Clin. Pharmacol. 32: 605-610.			1984	395.45	7	1	79.1	5	cationic	3.5	1.2
Abexinostat	783355-60-2	CN(C)Cc1c2ccccc2oc1C(=O)NCCOc3ccc(cc3)C(=O)NO	2.6	16.33		2.65	5.9	S. D. Undevia, L. Janisch, R. L. Schilsky, D. Loury, S. Balasubramanian, C. Mani, M. Sirisawad, J. J. Buggy, R. A. Miller, M. J. Ratain. Phase I study of the safety, pharmacokinetics (PK) and pharmacodynamics (PD) of the histone deacetylase inhibitor (HDACi) PCI-24781. J. Clin. Oncol. 26, no. 90150 (May 2008) abstract 14514. http://ascopubs.org/doi/abs/10.1200/jco.2008.26.90150.14514. Accessed De…	PCI 24781. CRA 024781. Data from 2h intravenous infusions, daiyly for 3 days, every 3 weeks. 15 patients. 12M/3F. STD dose levels between 2 and 2.4 mg/kg. Clearance 0.98 L.kg-1.h-1. MRT from clearance and VDss.		2004	397.42	8	3	104.3	8	neutral	2	1.7
ABP-700	1446482-29-6	COC(=O)C1(CC1)OC(=O)c2cncn2[C@H](C)c3ccccc3		50.08			0.24	Michel M. R. F. Struys, M.D., Ph.D., F.R.C.A., Beatrijs I. Valk, B.Sc., Douglas J. Eleveld, Ph.D., Anthony R. Absalom, Peter Meyer, Sascha Meier, Izaak den Daas, Thomas Chou, Kai van Amsterdam, Jason A. Campagna, Steven P. Sweeney, . A Phase 1, Single-center, Double-blind, Placebocontrolled Study in Healthy Subjects to Assess the Safety, Tolerability, Clinical Effects, and Pharmacokinetics–Pharma…	Averaged across 9 doses from 0.1 to 1 mg/kg. N=50 overall. 70 kg average weight assumed. Fairly linear data. Data reported in SI but no VDss or MRT available despite being mentioned in the calculations.		2012	314.34	6	0	70.4	7	neutral	2	2
Acamprosate	77337-76-9	OS(=O)(=O)CCCNC(=O)C	0.3	3.75	1	1.54	3.2	2003-Jul-23 PDF(2806k) Clinical Pharmacology and Biopharmaceutics Review 021431/S-000. FDA. Accessed through Pharmapendium.	Structure and smiles refer to free acid. 666 mg iv through infusion. N=24. 70 kg assumed. Tables on page 12. negligible ppb (PDR).		1984	181.21	5	2	83.5	4	anionic	-1.7	-5.2
Acarbose	56180-94-0	C[C@H]1O[C@H](O[C@H]2[C@H](O)[C@@H](O)[C@@H](O[C@H]([C@H](O)CO)[C@H](O)[C@@H](O)C=O)O[C@@H]2CO)[C@H](O)[C@@H](O)[C@@H]1N[C@H]3C=C(CO)[C@@H](O)[C@H](O)[C@H]3O	0.32	2.2		2.4	2.7	Putter J, Keup U, Krause HP, Muller L, and Weber H (1982) Pharmacokinetics of acarbose. Int. Congr. Ser. 594: 38-48.	mainly excreted renally after iv and mainly metabolized from gastrointestinal enzymes and bacteria after po dose (renal 1.7%)		1975	645.6	19	14	329	13	neutral	-9	-9
Acebutolol	37517-30-9	CCCC(=O)Nc1ccc(OCC(O)CNC(C)C)c(c1)C(=O)C	1.7	10	0.74	2.8	3.5	Kaye CM, Kumana CR, Leighton M, Hamer J, and Turner P (1976) Observations on the pharmacokinetics of acebutolol. Clin. Pharmacol. Ther. 19: 416-420. Meffin PJ, Winkle RA, Peters FA, and Harrison DC (1977) Acebutolol disposition after intravenous administration. Clin. Pharmacol. Ther. 22: 557-567. Roux A, Flouvat B, Chau NP, Letac B, and Lucsko M (1980) Pharmacokinetics of acebutalol after intrave…	Vss calculated from digitized plots from Kaye, et al, and from reported microconstants from Roux, et al.		1947	336.43	6	3	87.7	10	cationic	1.6	-0.23
Acecainide (N-acetylprocainamide)	32795-44-1	CCN(CC)CCNC(=O)c1ccc(NC(=O)C)cc1	1.9	4	0.9	7.9	6.4	Coyle JD, Boudoulas H, and Lima JJ (1991) Acecainide pharmacokinetics in normal subjects of known acetylator phenotype. Biopharm. Drug Dispos. 12: 599-612. Connolly SJ and Kates RE (1982) Clinical pharmacokinetics of N-acetylprocainamide. Clin. Pharmacokinet. 7: 206-220.			1972	277.36	5	2	61.4	7	cationic	1.3	-0.26
Acenocoumarol	152-72-7	[H]OC1=C(C(=O)Oc2ccccc12)[C@H](CC(C)=O)c1ccc(cc1)[N+]([O-])=O	0.24	1.28	0.02	3.125	7.22	Godbillon J, Richard J, Gerardin A, et al. Pharmacokinetics of the enantiomers of acenocoumarol in man. Br J Clin Pharmacol 1981, 12, 621-629.	Data from 25 mg iv dose, N=2, 77.5 Kg average weight (N=4), VDss = average of R(+) and S(-) enantiomers. T½ and CL is the average of single enantiomers and racemate R,S(±) (see Table 1). MRT calculated from CL and VDss and fu from PB 98.0% (average of enantiomers and racemate). The average of all available values for every parameter are reported. There are many differences between two enantiomers…		1953	353.33	7	1	106.7	6	anionic	2.5	0.12
Acetaminophen	103-90-2	CC(=O)Nc1ccc(O)cc1	1	5	0.52	3.3	2.5	Rowlins MD, Henderson DB, Hijab AR (1977) Pharmacokinetics of paracetamol (acetaminophen) after intravenous and oral administration. Eur. J. Clin. Pharmacol. 11: 283-286. Kurz H, Mauser-Ganshorn A, and Stickel HH (1977) Differences in the binding of drugs to plasma proteins from newborn and adult man. I. Eur. J. Clin. Pharmacol. 11: 463-467.	VDss calculated from micro rate constants provided in Rowlins et al.		1907	151.16	3	2	49.3	1	neutral	0.76	0.76
Acetazolamide	59-66-5	CC(=O)Nc1nnc(s1)S(=O)(=O)N	0.37	0.65	0.04	9.5	13	Chapron DJ, Sweeney KR, Feig PU, and Kramer PA (1985) Influence of advanced age on the disposition of acetazolamide. Br. J. Clin. Pharmacol. 19: 363-371.	VDss and t1/2 were calculated from C vs t data obtained by digitization of plots included in the reference.		1950	222.25	7	2	115	2	neutral	-1.5	-1.6
Acetylcysteine, N-	616-91-1	CC(=O)N[C@@H](CS)C(=O)O	0.55	3.1	0.17	3	5.5	Prescott LF, Donovan JW, Jarvie DR, and Proudfoot AT. The disposition and kinetics of intravenous N-acetylcysteine in patients with paracetamol overdosage. Eur. J. Clin. Pharmacol. 1989, 37, 501-506. Acetadote Product Label.			1921	163.19	4	2	66.4	3	anionic	-0.53	-3.8
Acetylmethadol, L-	1477-40-3	CC[C@H](OC(=O)C)C(C[C@H](C)N(C)C)(c1ccccc1)c2ccccc2	8.3	5.4	0.2	26	18	Walsh SL, Johnson RE, Cone EJ, and Bigelow GE (1998) Intravenous and oral l-.alpha.-acetylmethadol: pharmacodynamics and pharmacokinetics in humans. J. Pharmacol. Exp. Ther. 285: 71-82. Toro-Goyco E, Martin BR, and Harris LS (1980) Binding of 1-alpha-acetylmethadol and its metabolites to blood constituents. Biochem. Pharmacol. 29: 1897-1902.			1966	353.5	3	0	29.5	9	cationic	4.5	3.2
Acetylsalicylic Acid	50-78-2	CC(=O)Oc1ccccc1C(=O)O	0.22	12	0.68	0.3	0.26	Aarons L, Hopkins K, Rowland M, Brossel S, and Thiercelin JF (1989) Route of administration and sex differences in the pharmacokinetics of aspirin, administered as its lysine salt. Pharm. Res. 6: 660-666. Lee S, Johnson D, Klein J, and Eppler J (1995) Protein binding of acetylsalicylic acid and salicylic acid in porcine and human serum. Vet. Human Toxicol. 37: 224-225			1907	180.16	4	1	63.6	3	anionic	1.6	-1.7
ACHT 4-10	4037-01-8	CSCC[C@@H](C(=O)N[C@@H](CCC(=O)O)C(=O)N[C@@H](Cc1cnc[nH]1)C(=O)N[C@@H](Cc2ccccc2)C(=O)N[C@@H](CCCN=C(N)N)C(=O)N[C@@H](Cc3c[nH]c4c3cccc4)C(=O)NCC(=O)O)N	0.73	871		0.01	0.06	U. Bickel, J. Born, H.L. Fehm, M. Distler, and K. H. Voigt. The Behaviorally Active Peptide ACTH 4-10: Measurement in Plasma and Pharmacokinetics in Man. Eur J Clin Pharmacol (1988) 35:371-377	4-10-Corticotropin, ACTH (4-10). MRT from clearance and VDss, 125 ug dose, very high clearance.		1968	962.09	23	13	384.1	29	zwitterionic	-0.68	-4.5
Acivicin	42228-92-2	N[C@@H]([C@@H]1CC(=NO1)Cl)C(=O)O	0.5	0.69		12	9.9	McGovern JP, Pratt EA, Belt RJ, Taylor SA, Benjamin RS, Ardalan B, and Ohnuma T (1985) Pharmacokinetic and biochemical studies on acivicin in phase I clinical trials. Canc. Res. 45: 4460-4463.	VDss was calculated from C vs t data obtained by digitization of a plot for one subjected that was included in the reference. Plasma concentrations were determined by bioassay.		1973	178.57	5	2	84.9	2	zwitterionic	-0.38	-2.7
Aclidinium bromide	320345-99-1	c1ccc(cc1)OCCC[N+]23CCC(CC2)[C@H](C3)OC(=O)C(c4cccs4)(c5cccs5)O	4.3	48.5		1.76		PDR. Accessed August 07 2014. http://www.pdr3d.com/detail.php?c=82946#section-12	Assumed 70 kg as average weight. t1/2 iv not reported. MRT from VDss and clearance. CAS number for bromide salt. Bromide ion omitted from smiles.		2001	484.65	5	1	55.8	10	neutral	1.7	1.7
Actisomide	96914-39-5	CC(C)N(CC[C@@]1(C(N=C(C)N2CCCC[C@H]12)=O)c1ccccc1)C(C)C	0.58	6.79	0.7	1.58	1.89	Cook CS et al. Pharmacokinetics of a novel antiarrhythmic drug, Actisomide. Pharm Res, 1993, 10(3), 427-433.	Data from 50 mg/person 5 min iv infusion, N=6, 62.8 Kg average weight. t½ taken as the β phase. fu from Lombardo et al J. Clin. Pharmacol. 2013, 53(2), 167-177 and 178-191		1985	369.54	4	0	35.9	6	cationic	4	2.6
Acyclovir	59277-89-3	NC1=Nc2c(ncn2COCCO)C(=O)N1	0.71	4.7	0.85	2.5	2.5	De Miranda P and Blum MR (1983) Pharmacokinetics of acyclovir after intravenous and oral administration. J. Antimic. Chemother. 12(Suppl B): 29-37.			1976	225.2	8	3	114.8	4	neutral	-1.7	-1.8
Adefovir	106941-25-7	Nc1ncnc2c1ncn2CCOCP(=O)(O)O	0.42	3.7	0.96	1.9	1.6	Cundy KC, Barditch-Crovo P, Walker RE, Collier AC, Ebeling D, Toole J, and Jaffe HS. (1995) Clinical pharmacokinetics of adefovir in human immunodeficiency virus type 1-infected patients. Antimic. Agents Chemother. 39: 2401-2405. Hepsera Product Label.			1986	273.19	9	3	136.4	5	anionic	-1.6	-6.8
Adinazolam	37115-32-5	CN(C)Cc1nnc2CN=C(c3ccccc3)c4cc(Cl)ccc4n12	0.98	6.2	0.31	2.6	2.1	Fleishaker JC, Friedman H, and Pollock SR (1991) Extent and variability of the first-pass elimination of adinazolam mesylate in healthy male volunteers. Pharm. Res. 8: 162-167.			1972	351.83	5	0	46.3	3	neutral	1.3	1.3
AFN-1252	620175-39-5	Cc1c2ccccc2oc1CN(C)C(=O)/C=C/c3cc4c(nc3)NC(=O)CC4	0.43	0.9		8.4	6.4	Kaplan, Nachum; Garner, Colin; Hafkin, Barry. AFN-1252 in vitro absorption studies and pharmacokinetics following microdosing in healthy subjects. European Journal of Pharmaceutical Sciences (2013), 50(3-4), 440-446.	Profile digitized from Fig. 4. Microdose of 100 ug of AFN-1252 tosylate (equivalent to ~68.6 ug of AFN-1252) 30min infusion. N=4 male with median BMI of 24 (70kg body weight assumed).		2003	375.42	6	1	75.7	4	neutral	2.1	2.1
AG-EE-388 ZW	135969-54-9	C(c1c(cc(cc1)CC(=O)N[C@@H](CC(C)C)c1c(cccc1)N1CCCCC1)OCC)(=O)O	0.28	2.04		3	2.5	Greischel, Andreas; Beschke, Klaus; Rapp, Hermann; Roth, Willy. Quantitation of the new hypoglycemic agent AG-EE 388 ZW in human plasma by automated highperformance liquid chromatography with electrochemical detection. J. Chrom, Biomed App. 1991, 568, 246-252	1 mg dose but no N or average weight (assumed to be 70 kg) were reported. Electrochemical (specific) detection after administartion of 14-C labeled compound.		1987	452.59	6	2	78.9	10	anionic	5.8	2.4
Ajmaline	4360-12-7	CC[C@@H]1[C@H](N2[C@H]3CC1C4[C@@H]2CC5([C@H]3N(c6c5cccc6)C)[C@@H]4O)O	4	9.8	0.24	6.8	7.3	Roberto Padrini, Donatella Piovan, Antonio Javarnaro, Francesco Cucchini, Mariano Ferrari. Pharmacokinetics and Electrophysiological Effects of Intravenous Ajmaline. Clin. Pharmacokinet. 1993, 25, 408-414.//ppb: Köppel C, Wagemann A, Martens F. Pharmacokinetics and antiarrhythmic efficacy of intravenous ajmaline in ventricular arrhythmia of acute onset. Eur J Drug Metab Pharmacokinet. 1989, 14, 1…	Rauwolfine. N=10, average dose 67.4 mg, MRT from clearance and VDss. Average weight 67 kg.		1931	326.43	4	2	46.9	1	cationic	1.8	1.5
Albuterol (salbutamol)	18559-94-9	CC(C)(C)NCC(O)c1ccc(O)c(CO)c1	1.9	7.8	0.92	4.1	2.4	Boulton DW and Fawcett JP (1996) Enantioselective disposition of salbutamol in man following oral and intravenous administration. Br. J. Clin. Pharmacol. 1996, 41, 35-40. Morgan DJ, Paull JD, Richmond BH, Wilson-Evered E, and Ziccone SP (1986) Pharmacokinetics of intravenous and oral salbutamol and its sulphate conjugate. Br. J. Clin. Pharmacol. 22: 587-593.	Data for enantiomers were averaged.		1962	239.31	4	4	72.7	4	cationic	0.63	-1.5
Alcuronium	23214-96-2	OC\C=C/1\C[N@+]2(CC=C)CC[C@@]34[C@@H]2C[C@@H]1C5=CN6[C@H]7C(=CN([C@H]35)c8ccccc48)[C@H]9C[C@H]%10[C@@]7(CC[N@@+]%10(CC=C)C/C/9=C/CO)c%11ccccc6%11	0.32	1.3		4.1	3.6	Walker J, Shanks CA, and Triggs EJ (1980) Clinical pharmacokinetics of alcuronium chloride in man. Eur. J. Clin. Pharmacol. 17: 449-457.			1960	666.89	6	2	46.9	6	neutral	-4.8	-4.8
Alectinib	1256580-46-7	CCc1cc2c(cc1N3CCC(CC3)N4CCOCC4)C(c5c(c6ccc(cc6[nH]5)C#N)C2=O)(C)C	6.35	7.69	0.003	13.77	11.7	Peter N. Morcos, Li Yu, Katrijn Bogman, Mika Sato, Hisakazu Katsuki, Kosuke Kawashima, David J Moore, Matt Whayman, Keith Nieforth, Katja Heinig, Elena Guerini, Dieter Muri, Meret Martin-Facklam and Alex Phipps. Absorption, distribution, metabolism and excretion (ADME) of the ALK inhibitor alectinib: results from an absolute bioavailability and mass balance study in healthy subjects. Xenobiot. Ea…	Microtracer dose of 14C-labelled compound administered 3.75 hours after a 600 mg po dose. N= 6, 74.8 kg average reported. MRT from clearance and VDss.//ppb at 0.1, 1 and 10 ug/mL.		2010	482.62	6	1	72.4	4	cationic	5.2	4.9
Alendronate	66376-36-1	C(P(O)(O)=O)(P(O)(O)=O)(CCCN)O	0.33	2.6	0.22	2.1	3.1	Trimethylsilyldiazomethane derivatization coupled with solid-phase extraction for the determination of alendronate in human plasma by LC-MS/MS Meixia Chen, Ke Liu, Dafang Zhong, Xiaoyan Chen. Anal Bioanal Chem (2012) 402:791–798. ppb: reported by PDR :Protein binding in human plasma is approximately 78%. Accessed December 30 2014. http://www.pdr3d.com/detail.php?c=13132#section-3	Data digitized from plot reported. 10 mg dose, 4 hrs infusion, N=10, 70 kg average weight assumed, reported AUCinf. 935 ng.h/mL		1978	249.1	8	6	161.3	5	anionic	-3	-8.1
Alfacalcidol	41294-56-8	C[C@H](CCCC(C)C)[C@H]1CC[C@@H]\2[C@@]1(CCC/C2=C\C=C/3\C[C@H](C[C@@H](C3=C)O)O)C		0.82			48.6	L. Brandi, M. Egfjord, K. Olgaard. Pharmacokinetics of 1,25(OH)2D3 and 1a(OH)D3 in normal and uraemic men. Nephrol. Dial. Transpl. 2002, 17, 829-842.	1alpha-Hydroxy-vitamin D3. 1-Hydroxycholecalciferol. No volume of distribution reported. Clearance calculated from AUC0-72 hrs, N=6, 59.2 kg average weight, 4 ug dose iv.		1954	400.64	2	2	40.5	6	neutral	7.3	7.3
Alfentanil	71195-58-9	CCN1N=NN(CCN2CCC(COC)(CC2)N(C(=O)CC)c3ccccc3)C1=O	0.45	3.9	0.086	1.9	1.6	Bower S and Hull CJ (1982) Comparative pharmacokinetics of fentanyl and alfentanil. Br. J. Anaesth. 54: 871-877. McDonnell CG, Malkan D, Van Pelt FD, and Shorten GD (2003) Elimination of alfentanil delivered by infusion is not altered by the chronic administration of atorvastatin. Eur. J. Anaesth. 20: 662-667. Meuldermans WEG, Hurkmans RMA, and Heykants JJP (1982) Plasma protein binding and distr…			1980	416.52	9	0	81.1	9	neutral	2.8	2.7
Alfuzosin	81403-80-7	COc1cc2nc(nc(N)c2cc1OC)N(C)CCCNC(=O)C3CCCO3	1.5	5.9	0.14	4.2	4.8	Guinebault P, Colafranceschi C, Bianchetti G, Thenot JP, Maillard D, Thiercelin JF, Larribaud J, and Morselli PL (1984) Absolute bioavailability of alfuzosin, a new α1-​post synaptic receptor antagonist, after oral and intravenous administration. Biopharm. Pharmacokinet. 2nd European Congress 2: 578-583. ppb: The PDR states: Results of in vitro studies indicate that alfuzosin is moderately bound …	VDss calculated from C vs t data obtained by digitization of the plots included in the reference.		1982	389.45	9	2	111.8	8	cationic	2.3	1.8
Alinidine	33178-86-8	N(c1c(cccc1Cl)Cl)(C=1NCCN1)CC=C	2.72	12	0.4	3.77	3.14	Arndts, D.; Warnkross, H.; Rominger, K. L.; Justus, H. Proof of the Linearity of the Pharmacokinetics of Alidine in Man. Eur. J. Clin. Pharmacol. (1981), 21, 201-207.//ppb: R. E. Heckner. Systematic study of protein binding of biologically active substances. Pharmatherapeutica, 1973, 2, 177-186.	ST 567. 10 mg dose, specific RIA, N=5, average weight 74.7. MRT from VDss and clearance.//ppb: equilibrium dialysis, 0.4 ug/mL starting concentration in blood.		1971	270.16	3	1	27.6	4	cationic	3	1.7
Alizapride	59338-93-1	COc1cc2nn[nH]c2cc1C(=O)NCC3CCCN3CC=C	1.6	6.6		4	2.8	Houin G, Barre J, and Tillement JP. Absolute intramuscular, oral, and rectal bioavailability of alizapride. J. Pharm. Sci. (1984) 73: 1450-1453.	VDss calculated from C vs t data obtained by digitization of the plots included in the reference.		1975	315.37	7	2	83.1	6	cationic	1.9	0.91
Allopurinol	315-30-0	O=C1NC=Nc2[nH]ncc12	0.58	11	0.97	0.88	0.8	Breithaupt H and Tittel M (1982) Kinetics of allopurinol after sinlge intravenous and oral doses. Eur. J. Clin. Pharmacol. 22: 77-84. Elion GB, Kovensky A, Hitchings GH, Metz E, and Rundles RW (1966) Metabolic studies of allopurinol, an inhibitor of xanthine oxidase. Biochem. Pharmacol. 15: 863-889.			1913	136.11	5	2	70.1	0	neutral	-1.3	-1.4
Almitrine	27469-53-0	C(N1CCN(c2nc(nc(n2)NCC=C)NCC=C)CC1)(c1ccc(F)cc1)c1ccc(F)cc1	35.37	0.97	0.01	607	1344	Bernhard R. Winkelmann, Thomas H. Kullmer, Dieter G. Kneissi, Dietmar Trenk, Hartmut Kronenberger. Low-dose Almitrine Bismesylate in the Treatment of Hypoxemia due to Chronic Obstructive Pulmonary Disease. Chest, 1994; 105, 1383-1391.////ppb: Bromet N; Singlas E. Clinical pharmacokinetics of almitrine dimesylate. Presse medicale, 1984, 13, 2071-2077.	N=7, average weight 64 kg. 60 mg dose. VD reported taken as VDss after calculation from clearance and t 1/2 yielded a much higher value. MRT from clearance and VDss.		1970	477.55	7	2	69.2	10	neutral	6	6
Almokalant	123955-10-2	C(c1ccc(cc1)OC[C@@H](C[N@@](CCC[S@@](=O)CCC)CC)O)#N	1.8	11.3		2.65	2.4	Electropharmacologic effects and pharmacokinetics of almokalant, a new class III antiarrhythmic, in patients with healed or healing myocardial infarcts and complex ventricular arrhythmias Wiesfeld A C; Crijns H J; Tobe T J; Almgren O; Bergstrand R H; Aberg J; Haaksma J; Lie K I. The American journal of cardiology (1992), 70(11), 990-996.	Intravenous infusion (10') of 4.5 mg. N=10. Data reported in table III. MRT from VDss/clearance		1989	352.49	5	1	73.6	13	cationic	2	1.4
Almorexant	871224-64-5	CNC(=O)C(N1CCC2=C(C=C(OC)C(OC)=C2)[C@@H]1CCC1=CC=C(C=C1)C(F)(F)F)C1=CC=CC=C1	9.75	10.2		15.9	34.3	Absolute Oral Bioavailability of Almorexant, a Dual Orexin Receptor Antagonist, in Healthy Human Subjects. Matthias Hoch Petra Hoever, Jochen Zisowsky, Anthony Priestley, David Fleet, Jasper Dingemanse. Pharmacology 2012;89:53–57.	N=20, 20 mg dose, 70 kg assumed. 30' infusion. MRT from VDss and clearance.		2005	512.56	5	1	50.8	8	neutral	5.5	5.5
Almotriptan	154323-57-6	CN(C)CCc1c[nH]c2ccc(CS(=O)(=O)N3CCCC3)cc12	2.2	8.9	0.6	4.2	3.4	Gras J, Llenas J, Jansat JM, Jáuregui J, Cabarrocas X, Palacios JM (2002) Almotriptan, a New Anti-Migraine Agent: A Review CNS Drug Rev. 8: 217-234. Jansat, JM, Costa J, Salva P, Fernandez FJ, and Martinez-Tobed A (2002) Absolute bioavailability, pharmacokinetics, and urinary excretion of the novel antimigraine agent almotriptan in healthy male volunteers. J. Clin. Pharmacol. 42: 1303-1310.	VDss calculated from MRT and CL reported in Jansat, et al.		1994	335.46	5	1	56.4	6	cationic	1.8	0.63
Alosetron	122852-42-0	Cc1[nH]cnc1CN2CCc3c(C2=O)c4ccccc4n3C	1.1	8.7	0.18	2.1	1.6	Kock KM, Palmer JL, Noordin N, Tomlinson JJ, and Baidoo C (2002) Sex and age differences in the pharmacokinetics of alosetron. Br. J. Clin. Pharmacol. 53: 238-242. Lotronex Product Label			1989	294.35	5	1	53.9	2	neutral	1.4	1.4
Alpiropride	81982-32-3	C1C[N@@]([C@@H](C1)CNC(c1c(cc(c(c1)S(NC)(=O)=O)N)OC)=O)CC=C	2.3	5.47		7	4.8	F. BRESSOLLE, J. BRES and M. SNOUSSI. High-performance liquid chromatographic determination of a new benzamide in biological fluids for use in a human pharmacokinetic study. Journal of Chromatography, Biomedical Applications 1985 343, 443-448	Reported as Riv 2093. N=12, 50 mg dose. 67 kg weight calculated from VDss (L/kg), clearance (L/h) and MRT.		1982	382.48	8	3	113.8	8	cationic	0.97	-0.1
Alprazolam	28981-97-7	Cc1nnc2CN=C(c3ccccc3)c4cc(Cl)ccc4n12	0.8	0.74	0.29	18	12	Smith RB, Kroboth PD, Vanderligt JT, Phillips JP, and Juhl RP (1984) Pharmacokinetics and pharmacodynamics of alprazolam after oral and IV administration. Psychopharmacology 84: 452-456. Greenblatt DJ and Wright CE (1993) Clinical pharmacokinetics of alprazolam. Therapeutic implications. Clin. pharmacokinet. 24: 453-471.	VDss obtained from C vs t data obtained by digitization of the plot provided in the reference.		1970	308.76	4	0	43.1	1	neutral	2	1.9
Alprenolol	13655-52-2	CC(C)NCC(O)COc1ccccc1CC=C	3.2	15	0.18	3.6	2.5	Bodin NO, Borg KO, Johansson R, Obianwu H, Svensson R. The absorption, distribution, and excretion of alprenolol in man, dog, and rat. Acta Pharmacol. Toxicol. 1974, 35, 261-269. Imamura H, Komori T, Ismail A, Suenaga A, and Otagiri M (2002) Stereoselective protein binding of alprenolol in the renal diseased state. Chirality 14: 599-603.	VDss and CL calculated from C vs t data obtained by digitization of the plot provided in the reference.		1966	249.35	3	2	41.5	8	cationic	2.4	0.64
Alprostadil	745-65-3	CCCCC[C@@H](/C=C/[C@H]1[C@@H](CC(=O)[C@@H]1CCCCCCC(=O)O)O)O	2.4	45.4		0.9	1.9	W. Cawello , H. Schweel , R. Miiller, R. Bonn, H.W. Seyberth. Metabolism and pharmacokinetics of prostaglandin E1 administered by intravenous infusion in human subjects. Eur J Clin Pharmacol (1994) 46:275-277	PGE1. Plot available for digitization. Calculation perforrmed via Phoenix after digitization. Dose 60 ug 2h of infusion, N=12		1956	354.48	5	3	94.8	13	anionic	3.5	0.93
Alvimopan	156053-89-3	C[C@H]1CN(CC[C@@]1(C)c2cccc(c2)O)C[C@H](Cc3ccccc3)C(=O)NCC(=O)O	0.43	5.84	0.2	1.24	5.3	Biopharmaceutics review: https://www.accessdata.fda.gov/drugsatfda_docs/nda/2008/021775_ENTEREG_CAPSULES_BIOPHARMR.pdf. Accessed on April 11 2017.	iv dose, 12 mg, 70 kg assumed as average weight. 6% F; 35% renal clearance. MRT from VDss/clearance.		1994	424.53	6	3	89.9	8	zwitterionic	3.1	0.28
Amantadine	768-94-5	NC12CC3CC(CC(C3)C1)C2	6.6	4.8	0.33	23	16	Aoki FY and Sitar DS (1988) Clinical pharmacokinetics of amantadine hydrochloride. Clin. Pharmacokinet. 14: 35-51.			1957	151.25	1	1	26	0	cationic	2.5	-0.43
Amdinocillin	32887-01-7	CC1(C)S[C@@H]2[C@H](\N=C\N3CCCCCC3)C(=O)N2[C@H]1C(=O)O	0.37	6.3	0.9	1	1.1	Patel IH, Bornemann LD, Brocks VM, Fang LS, Tolkoff-Rubin NE, and Rubin RH (1985) Pharmacokinetics of intravenous amdinocillin in healthy subjects and patients with renal insufficiency. Antimicrob. Agents Chemother. 28: 46-50.//ppb: Tan, James S.; Salstrom, Sara Jane; File, Thomas M., Jr. Levels of amdinocillin in human plasma and interstitial fluid following intravenous administration. The Ameri…	Mecillinam. VDss obtained from C vs t data obtained by digitization of the plot provided in the reference.		1971	325.43	6	1	73.2	3	zwitterionic	2.4	0.068
Amezinium	41658-78-0	c1c(cc([n+](n1)c1ccccc1)OC)N	4	5.1		13	14.1	Kaumeier S, Kehrhahn OH, Morgenthaler H, Neugebauer G. Absolute bioavailability of amezinium. A cross-over study after i.v. and p.o. application.Arzneimittelforschung. 1981;31(9a):1653-7.	BRN 4141517. 72 kg reported data. N=8, 10 mg, MRT from VDss and clearance. (all average)		1973	202.23	4	1	52	2	neutral	-0.75	-0.75
Amifloxacin	86393-37-5	c12c(c(c(C(O)=O)cn1NC)=O)cc(F)c(c2)N1CCN(C)CC1		4.56			4.66	Schentag J J et al. Pharmacokinetics of Amifloxacin After Oral and Intravenous Administration. Review of infectious diseases. 1989 11, suppl 5	Average of 4 (doses 200, 400, 600 every 12h and 400 every 8h, N=5 male for each one). Values reported as steady state. Average CL renal = 2.38 mL/min/kg (52% of total)		1983	334.35	7	2	77.8	3	cationic	2.4	0.2
Amifostine	20537-88-6	C(SP(O)(O)=O)CNCCCN	0.09	30.65		0.05	0.15	LESLIE M. SHAW, PH.D., ANDREW T. TURRISI, M.D., DONNA J. GLOVER, M.D., HEATHER S. BONNER, B.S., A. LORRAINE NORFLEET, B.S., CLARE WEILER, R.N. AND MORTON M. KLIGERMAN, M.D. HUMAN PHARMACOKINETICS OF WR-2721. Int. J. Radiation Oncology Bio. Phys.. 1986, 12, 1501-1504.	WR-2721, NSC 296961. 12 patients with different types of tumor. 70.8 kg average weight. 150 mg/m2, 10 seconds injection.		1969	214.22	5	4	95.6	7	cationic	-1.4	-3.8
Amikacin	37517-28-5	NCC[C@H](O)C(=O)N[C@@H]1C[C@H](N)[C@@H](O[C@H]2O[C@H](CN)[C@@H](O)[C@H](O)[C@H]2O)[C@H](O)[C@H]1O[C@H]3O[C@H](CO)[C@@H](O)[C@H](N)[C@H]3O	0.16	1.1	0.88	2.4	2.4	Lanao JM, Dominguez-Gil A, Tabernero JM, and De Castro S (1979) Pharmacokinetics of amikacin (BB-K8) in patients with normal or impaired renal function. Int. J. Clin. Pharmacol. Biopharm. 17: 171-175. Clarke JT, Libke RD, Regamey C, and Kirby WMM (1974) Comparative pharmacokinetics of amikacin and kanamycin. Clin. Pharmacol. Ther. 15: 610-616. Brunnemann SR and Segal JR (1991) Amikacin serum prot…	CL calculated from reported compartmental model parameters. Protein binding data averaged from two papers.		1974	585.6	18	13	331.9	10	cationic	-9	-9
Aminocamptothecin, 9-	91421-43-1	CC[C@@]1(O)C(=O)OCC2=C1C=C3N(Cc4cc5c(N)cccc5nc34)C2=O	2.2	6.5	0.003	5.6	7	Herben VM, van Gijn R, Schellens JH, Schot M, Lieverst J, Hillebrand MJ, Schoemaker NE, Porro MG, Beijnen JH, and ten Bokkel Huinink WW (1999) Phase I and pharmacokinetic study of a daily times 5 short intravenous infusion schedule of 9-aminocamptothecin in a colloidal dispersion formulation in patients with advanced solid tumors. J. Clin. Oncol.17: 1906-1914. Masubuchi N, May RD, and Atsumi R (2…			1984	363.37	7	2	105.8	1	neutral	1.1	1.1
Aminohexanoic acid, 6-	60-32-2	NCCCCCC(=O)O	0.39	2.5	0.92	2.6	4.9	Frederiksen MC, Bowsher DJ, Ruo TI, Henthorn TK, Ts'ao CH, Green D, and Atkinson AJ (1984) Kinetics of epsilon-aminocaproic acid distribution, elimination, and antifibrinolytic effects in normal subjects. Clin. Pharmacol. Ther. 35: 387-393. McNicol GP, Fletcher AP, Alkjaersig N, and Sherry S (1962) The absorption, distribution, and excretion of e-aminocaproic acid following oral or intravenous ad…	Aminocaproic acid		1909	131.17	3	2	63.3	5	zwitterionic	0.16	-2.1
Aminolevulinic acid	106-60-5	NCC(CCC(O)=O)=O	0.12	1.88	0.88	1.06	0.83	1999-Nov-19 PDF(1255k) Pharmacology Review 020965/S-000. NDA 20-965 page 21.	Levulan kerastick. N=6, 1.34 mg/kg. MRT from VDss and Cl.		1948	131.13	4	2	80.4	4	zwitterionic	-2	-2.8
Aminosalicylic acid, 5-	89-57-6	Nc1ccc(O)c(c1)C(=O)O	0.33	9.3	0.39	0.59	0.61	Bondesen S, Hegnhoj J, Larsen F, Hansen H, Hansen CP, and Rasmussen SN (1991) Pharmacokinetics of 5-aminosalicylic acid in man following administration of intravenous bolus and per os slow-release formulation. Digest. Dis. Sci. 12: 1735-1740. Way EL, Smith PK, Howie DL, Weiss R, and Swanson R (1948) The absorption, distribution, excretion, and fate of para-aminosalicylic acid. J. Pharmacol. Exp. …	Mesalamine. Mesalazine. VDss and t1/2 calculated from data obtained by digitization of C vs t plots provided in the references.		1907	153.14	4	3	83.6	1	anionic	0.67	-2.6
Amiodarone	1951-25-3	CCCCc1oc2ccccc2c1C(=O)c3cc(I)c(OCCN(CC)CC)c(I)c3	60	1.9	0.0002	620	820	Ujhelyi MR, Klamerus KJ, Vadiei K, O'Rangers E, Izard M, Neefe DL, Zimmerman JJ, and Chow MSS (1996) Disposition of intravenous amiodarone in subjects with normal and impaired renal function. J. Clin. Pharmacol. 36: 122-130. Veronese ME, McLean S, and Hendriks R (1988) Plasma protein binding of amiodarone in a patient population: measurement by erythrocyte partitioning and a novel glass-binding m…			1962	645.31	4	0	43	11	cationic	7.5	6.2
Amiprilose	56824-20-5	O1[C@H]2[C@@H]([C@H]([C@H]1[C@H](O)CO)OCCCN(C)C)OC(C)(C)O2	1.04	3.48	0.97	5	4.07	Garrett E R; Van Peer A; Altmayer P; Schuermann W; Lucker P. Pharmacokinetics of the immunomodulatory 1,2-O-isopropylidene-3-O-3'-(N',N'-dimethyl-amino-n-propyl)-Dglucofuranose hydrochloride in normal human volunteers. J. Pharmacokin. Biopharm. 1982, 10, 247-264	3-O-(3-(Dimethylamino)propyl)-1,2-O-(1-methylethylidene)-alpha-D-glucofuranose. 96% excreted in urine. All subjects taken. VDss calculated from MRT and clearance. MRT in turn calculated via C1, C2 and lambda 1 and lambda 2. All values taken from overall means.		1975	305.37	7	2	80.6	7	cationic	-0.32	-2.4
Amitriptyline	50-48-6	CN(C)CCC=C1c2ccccc2CCc3ccccc13	8.7	6.1	0.07	24	17	Jorgensen A and Hansen V (1976) Pharmacokinetics of amitriptyline infused intravenously in man. Eur. J. Clin. Pharmacol. 10: 337-341. Nyberg G and Maartensson E (1984) Determination of free fractions of tricyclic antidepressants. Naunyn-Sch Arch. Pharmacol. 327: 260-265.			1960	277.4	1	0	3.2	3	cationic	4.6	3.3
Amlodipine	88150-42-9	CCOC(=O)C1=C(COCCN)NC(=C(C1c2ccccc2Cl)C(=O)OC)C	17	7	0.005	40	34	Faulkner JK, McGibney D, Chasseaud LF, Perry JL, and Taylor IW (1986) The pharmacokinetics of amlodipine in healthy volunteers after single intravenous and oral doses and after 14 repeated oral doses given once daily. Br. J. Clin. Pharmacol. 22: 21-25. Kirsten R, Nelson K, Kirsten D, and Heintz B (1998) Clinical pharmacokinetics of vasodilators. Part I. Clin. Pharmacokinet. 34: 457-482.	VDss calculated from C vs t data obtained by digitization of the plot in Faulkner et al.		1983	408.88	7	2	99.9	10	cationic	2	0.44
Amodiaquine	86-42-0	CCN(CC)Cc1cc(ccc1O)Nc2ccnc3c2ccc(c3)Cl	17.4	217		1.34	2.1	White, N. J.; Looareesuwan, Sornchai; Edwards, G.; Phillips, R. E.; Karbwang, Juntra; Nicholl, Deborah D.; Bunch, C.; Warrell, D. A.. Pharmacokinetics of intravenous amodiaquine. British Journal of Clinical Pharmacology (1987), 23(2), 127-135	N=6 10 mg/kg as 4 hours infusion. 50 kg average weight. Clearance reported as 13 L.kg-1.h-1 in healthy volunteer (data taken) while an average of 5 L.kg-1.h-1 was reported for 10 malaria patients. Same dose and infusion time. MRT from VDss and clearancePlots available. EXTREMELY HIGH CLEARANCE.		1948	355.86	4	2	48.4	6	cationic	5.4	2
Amonafide	69408-81-7	c12c3C(N(CCN(C)C)C(c1cccc2cc(c3)N)=O)=O	7.33	19.32		6.34	4.78	Clinical Pharmacokinetics of Amonafide (NSC 308847) in 62 Patients. W. Kreis, M.D., Ph.D.,l K. Chan, Ph.D., D. R. Budman, M.D.,S. L. Allen, M.D., D. Fusco, B.S.N., A. Mittelman, M.D., J. Freeman, M.S., K. Hock, B.A., S. Akerman, B.S., A. Calabro, M.S., C. Puccio, M. Spigelman, M.D.Cancer Investigation, 1996, 14(4), 320-327.	Data reported in Table 1. Weight-averaged across all patients. Linear PK. VDss from CL and MRT reported, t1/2 from compartmental analysis.		1978	283.33	5	1	66.6	3	neutral	1.5	1.3
Amoxicillin	26787-78-0	CC1(C)S[C@@H]2[C@H](NC(=O)[C@H](N)c3ccc(O)cc3)C(=O)N2[C@H]1C(=O)O	0.25	3.3	0.85	1.3	1.1	Arancibia A, Guttmann J, Gonzalez G, and Gonzalez C (1980) Absorption and disposition kinetics of amoxicillin in normal human subjects. Antimicrob. Agents Chemother. 17: 199-202. Bergan T (1984) Pharmacokinetics of beta-lactam antibiotics. Scand. J. Infect. Dis. 42(Suppl): 83-98.			1970	365.4	8	4	133	4	zwitterionic	0.42	-1.3
AMP579	213453-89-5	CC[C@H](Cc1c(ccs1)Cl)Nc2c3ccn(c3ncn2)[C@@H]4C[C@@H]([C@H]([C@H]4O)O)C(=O)NCC	0.84	12	0.03	1.18	1.33	Peter N. Zannikos, PharmD, PhD, Bradford K. Jensen, PhD, Bruno X. Boutouyrie, MD, Lisa Tripp, BS, Luo Yongyi, MS, Tracy McGowan, MD, Scott A. Waldman, MD, PhD, and Howard E. Greenberg, MD, MS. Pharmacokinetics and Safety of Single Intravenous Infusions of the Adenosine Agonist, AMP 579, in Patients with End-Stage Renal Insufficiency. Journal of Clinical Pharmacology, 2000;40:745-751	Data taken from Table II. N=6, healthy volunteers, 50 ug/kg as a 6-hour infusion. MRT from clearance and VDss. Seemingly no significant difference with renally impaired patients.		1998	478.01	8	4	112.3	8	neutral	2.6	2.6
Amphetamine (-d)	51-64-9	c1(ccccc1)C[C@H](C)N	6.1	9.7	0.8	10	7.3	Angagard E, Gunne LM, Jonsson LE and Niklasson F (1970) Pharmacokinetics and clinical studies on amphetamine dependent subjects. Eur. J. Clin. Pharmacol. 3: 3-11. Busto U, Bendayan R, and Sellers EM (1989) Clinical pharmacokinetics of non-opiate abused drugs. Clin. Pharmacokinet. 16: 1-26. De la Torre R, Farre M, Navarro M, Pacifici R, Zuccaro P, and Pichini S. Clinical pharmacokinetics of amfeta…	PK reported as monoexponential decline so reported VD was used as VDss. CL calculated from VD and t1/2.		1946	135.21	1	1	26	2	cationic	1.8	-0.64
Amphotericin B	1397-89-3	[H]N([H])[C@@H]1[C@@H]([C@@H](O[C@@H]2C[C@H]3[C@H](C(=O)O[H])[C@H](C[C@@](C[C@H](C[C@H]([C@@H](CC[C@H](C[C@H](CC(=O)O[C@@H](C)[C@H](C)[C@@H]([C@@H](C)C=CC=CC=CC=CC=CC=CC=C2)O[H])O[H])O[H])O[H])O[H])O[H])(O[H])O3)O[H])O[C@H](C)[C@H]1O[H])O[H]	0.62	0.17	0.03	61	40	Kan, V. L.; Bennett, J. E.; Amantea, M. A.; Smolskis, M. C.; McManus, E.; Grasela, D. M.; Sherman, J. W. Comparative safety, tolerance, and pharmacokinetics of amphotericin B lipid complex and amphotericin B deoxycholate in healthy male volunteers. J. Infect. Dis. 1991, 164, 418-421.	Bellmann, R. Curr. Clin. Pharmacol., 2007, 2, 37-58. VDss 0.62 L/kg. PK parameters variability due to formulation and disease state, reported in a plethora of references, cited by the same author. Actual data data taken from Kan et al. J. Infect. Dis. 1991, 164, 418-421. N=16 healthy volunteers.		1945	924.08	18	12	319.6	15	zwitterionic	3.1	0.41
Ampicillin	69-53-4	CC1(C)S[C@@H]2[C@H](NC(=O)[C@H](N)c3ccccc3)C(=O)N2[C@H]1C(=O)O	0.22	2.8	0.85	1.3	1.4	Blum RA, Kohli RK, Harrison NJ, and Schentag JJ (1989) Pharmacokinetics of ampicillin (2.0 grams) and sulbactam (1.0 gram) coadministered to subjects with normal and abnormal renal function and with end-stage renal disease on hemodialysis. Antimic. Agents Chemother. 33: 1470-1476. Bergan T (1984) Pharmacokinetics of beta-lactam antibiotics. Scand. J. Infect. Dis. 42(Suppl): 83-98.			1953	349.4	7	3	112.7	4	zwitterionic	0.85	-0.85
Amrinone	60719-84-8	NC1=CC(=CNC1=O)c2ccncc2	1.3	8.9	0.89	2.4	2	Hamilton RA, Kowalsky SF, Wright EM, Cernak P, Benziger DP, Stroshane RM, and Edelson J (1986) Effect of the acetylator phenotype on amrinone pharmacokinetics. Clin. Pharmacol. Ther. 40: 615-619. Koprda V, Trnovec T, and Landmann H (1986) The binding of amrinone to plasma proteins. Pharmazie 41: 300-301.	CL value from rapid acetylators only.		1977	187.2	4	2	68	1	neutral	-0.67	-0.73
Amsacrine	51264-14-3	COc1cc(NS(=O)(=O)C)ccc1Nc2c3ccccc3nc4ccccc24	1.6	4.3	0.029	6.2	4.7	Jurlina JL, Varcoe AR, and Paxton JW (1985) Pharmacokinetics of amsacrine in patients receiving combined chemotherapy for treatment of acute myelogenous leukemia. Canc. Chemother. Pharmacol. 14: 21-25. Paxton JW, Kim SN, and Whitfield LR (1990) Pharmacokinetic and toxicity scaling of the antitumor agents amsacrine and CI-921, a new analogue, in mice, rats, rabbits, dogs, and humans. Cancer Res. 5…	VDss reported in Paxton, et al, and cites Jurlina, et al., references which has only Vdbeta at 1.7 L/kg. Used value from Paxton report.		1973	393.46	6	2	80.3	5	cationic	4	0.85
Amsalog	80841-47-0	CNC(=O)c1cccc2c(Nc3ccc(NS(=O)(=O)C)cc3OC)c4cccc(C)c4nc12	0.3	2.6	0.0011	1.9	2.4	Paxton JW, Hardy JR, Evans PC, Harvey VJ, and Baguley BC (1988) The clinical pharmacokinetics of N-5-dimethyl-9-[(2-methoxy-4-methyl-sulfonylamino)phenylamino]-4-acridinecarboxamide (CI-921) in a phase 1 trial. Canc. Chemother. Pharmacol. 22: 235-240. Fyfe D, Prce C, Langley RE, Pagonis C, Houghton J, Osborne L, Woll PJ, Gardner C, Baguley BC, and Carmichael J (2001) A phase I trial of amsalog (C…			1981	464.54	8	3	109.4	6	cationic	3.5	0.63
Amygdalin	29883-15-6	O1[C@@H](O[C@@H](c2ccccc2)C#N)[C@@H]([C@@H](O)[C@@H]([C@H]1CO[C@@H]1O[C@@H]([C@@H](O)[C@@H]([C@H]1O)O)CO)O)O	0.21	1.88		1.83	1.23	Xiaobing Li Fuguo Shi, Pan Gua, Lingye Liua, Hua Heb,, Li Dinga. A sensitive LC–MS/MS method for simultaneous determination of amygdalin and paeoniflorin in human plasma and its application. Journal of Pharmaceutical and Biomedical Analysis 92 (2014) 160–164	N=2, 70 kg assumed. 4 hours infusion. Digitized from plot. Huoxue-Tongluo lyophilized powders for injection (6 g, containing 25.3 mg of amygdalin and 35.8 mg of paeoniflorin) were supplied by Jiangsu Kanion Pharmaceutical Co., Ltd. (Lianyun-gang, China).		1885	457.43	12	7	202.3	8	neutral	-3.8	-3.8
Anhydrovinblastine	38390-45-3	CCC1=C[C@@H]2CN(CCc3c([nH]c4ccccc34)[C@@](C2)(C(=O)OC)c5cc6c(cc5OC)N(C)[C@H]7[C@](O)([C@H](OC(=O)C)[C@]8(CC)C=CCN9CC[C@]67[C@H]89)C(=O)OC)C1	12	12		17	18	Ramnath N, Schwartz GN, Smith P, Bong D, Kanter P, Berdzik J, and Creaven PJ (2003) Phase I and pharmacokinetic study of anhydrovinblastine every three weeks in patients with refractory solid tumors. Canc. Chemother. Pharmacol. 51: 227-230.	VDss was calculated from C vs t data obtained by digitization of the plots provided in the reference. Median values for CL and t1/2 were reported.		1971	792.96	12	2	133.9	10	cationic	4.8	4.5
Anidulafungin	166663-25-8	CCCCCOc1ccc(cc1)c2ccc(cc2)c3ccc(cc3)C(=O)N[C@H]4C[C@@H](O)[C@@H](O)NC(=O)[C@@H]5[C@@H](O)[C@@H](C)CN5C(=O)[C@@H](NC(=O)C(NC(=O)[C@@H]6C[C@@H](O)CN6C(=O)C(NC4=O)[C@@H](C)O)[C@H](O)[C@@H](O)c7ccc(O)cc7)[C@@H](C)O	0.57	0.21	0.16	45	40	Dowell JA, Schranz J, Baruch A, and Foster G (2005) Safety and pharmacokinetics of coadministered voriconazole and anidulafungin. J. Clin. Pharmacol. 45: 1373-1382. Eraxis Product Label.			1993	1140.24	24	14	377.4	14	neutral	1.6	1.6
Antazoline	91-75-8	c1ccc(cc1)CN(CC2=NCCN2)c3ccccc3	3.9	19.67		3.45	2.29	Joanna Giebułtowicza,, Roman Piotrowski, Jakub Baran, Piotr Kułakowski,Piotr Wroczyński. Application of a novel liquid chromatography/tandem massspectrometry method for the determination of antazoline in humanplasma: Result of ELEPHANT-I [ELEctrophysiological, pharmacokineticand hemodynamic effects of PHenazolinum (ANTazoline mesylate)]human pharmacokinetic study. J. of Pharm. Biomed. Anal. 2016,…	N=9, intravenous dose, 100 mg. Data reported as median.		1944	265.35	3	1	27.6	5	cationic	2.8	0.28
Antipyrine	60-80-0	CN1N(C(=O)C=C1C)c2ccccc2	0.77	0.64	0.93	20	12	Andreasen PB and Vesell ES (1974) Comparison of plasma levels of antipyrine, tolbutamide, and warfarin after oral and intravenous administration. Clin. Pharmacol. Ther. 16: 1059-1065. Danhof M, vanZuilen A, Boeijinga JK, and Breimer DD (1982) Studies of the different metabolic pathways of antipyrine in man. Eur. J. Clin. Pharmacol. 21: 433-441. Lee KJ, Mower R, Hollenbeck T, Castelo J, Johnson N,…	Danhof reference not included for VDss (would require digitization); Andreason reference used a one-compartment model so VDc = VDss.		1890	188.23	3	0	23.5	1	neutral	0.19	0.19
Antofloxacin	119354-43-7	O=C(C(C(=C(C(=C1F)N(CCN2C)CC2)OC2)N(C3)[C@H]2C)=C1N)C=3C(O)=O	2.42	2.2	0.82	18.3	20.1	Pharmacokinetics of antofloxacin hydrochloride, a novel fluoroquinolone, after single-dose intravenous administration in healthy Chinese male volunteers. Wang et al. Xenobiot. 2010, 40, 344-349	Data digitized and calculation performed via WinNonLin 5.2. N=12. 300 mg mg dose, average weight 61 kg. Linear PK reported (200, 300, 400 mg doses). Ppb reported by same authors.		1988	376.38	8	2	99.3	2	zwitterionic	1.5	-0.73
Apalcillin	63469-19-2	[H]N(C([C@@H](c1ccccc1)N([H])C(c1cnc2cccnc2c1O[H])=O)=O)[C@@H]1C2N(C1=O)[C@@H](C(=O)O[H])C(C)(C)S2	0.16	1.9	0.1	1.4	1.2	Busch von U., Heinzel g., Seyfarth H., Mielenz H. Arzneim.-Forsch. 1982, 32, 1131-1135. Investigation of the pharmacokinetics of apalcillin in man.	Data digitized is reported only for 1 subject (subject 3) AUC reported for individual subject in close agreement with reported clearance and AUC as well as for t1/2. N=7 and 70 kg average weight assumed. Subject # 3 in the middle of range and considered representative of cohort. Protein binding reported as approximately 90%.		1977	521.55	11	4	161.8	8	anionic	1.8	-1.6
Apixaban	503612-47-3	N1(CCc2c(C1=O)n(nc2C(=O)N)c1ccc(cc1)OC)c1ccc(cc1)N1CCCCC1=O	0.3	0.8	0.13		12	FDA aproval data. Accessed through PharmaPendium on June 23 2014.https://www.pharmapendium.com/fda.do?document=a9a1a313612e0fc9f6473123da9f3f58&drugName=Apixaban&reference=32 clearance 3.43 L/h and t1/2 12 h. 70 kg assumed. VDss 21 L.	Assumed 70 kg as average weight.		2003	459.5	9	1	110.8	5	neutral	2.5	2.5
Apomorphine	58-00-4	c12c3c4c(ccc(c4O)O)C[C@H]1[N@@](CCc2ccc3)C	1.6	40	0.05	0.67	0.68	van der Geest R, van Laar T, Kruger PP, Gubbens-Stibbe JM, Boddé HE, Roos RA, Danhof M.Pharmacokinetics, enantiomer interconversion, and metabolism of R-apomorphine in patients with idiopathic Parkinson's disease. Clin. Neuropharmacol. 1998, 21, 159-168. Smith RV, Velagapudi RB, McLean AM, and Wilcox RE (1985) Interactions of apomorphine with serum and tissue proteins. J. Med. Chem. 28: 613-620.	Apokyn. N=10 (5M and 5F) 30 ug/kg in 15 minutes. MRT from VDss and clearance. Monocompartmental fit.		1891	267.32	3	2	43.7	0	cationic	3	2.1
Apremilast	608141-41-9	CCOc1cc(ccc1OC)[C@@H](CS(=O)(=O)C)N2C(=O)c3cccc(c3C2=O)CC(=O)C		2.38	0.32		6.03	PDR. Accessed October 13 2014. http://www.pdr3d.com/detail.php?c=132827#section-13	OTEZLA. VD reported (likely to be Vz) at 87 L. Clearance reported as 10 L/hr and 70 kg average weight assumed. Ppb reported as 68%. T1/2 calculated from Vz and clearance.		2002	459.51	8	0	107.1	9	neutral	1.2	1.2
Aprepitant	170729-80-3	C[C@@H](O[C@H]1OCCN(CC2=NNC(=O)N2)[C@H]1c3ccc(F)cc3)c4cc(cc(c4)C(F)(F)F)C(F)(F)F	0.94	1	0.05	16	13	Majumdar AK, Howard L, Goldberg, MR, Hickey L, Constanzer M, Rothenberg PL, Crumley TM, Panebianco D, Bradstreet TE, Bergman AJ, Waldman SA, Greenberg HE, Butler K, Knops A, De Lepeleire I, Michiels N, and Petty KJ (2006) Pharmacokinetics of aprepitant after single and multiple oral doses in healthy volunteers. J. Clin. Pharmacol. 46: 291-300. Emend Product Label.			1995	534.43	7	2	75.2	6	neutral	4.1	4.1
AR-709	663214-64-0	CN(C)C(=O)c1c(c2cc(ccc2[nH]1)Cl)Cc3cc4c(cc(c(c4o3)OC)OC)Cc5cnc(nc5N)N	5.06	7.49		11.27	44.55	G. Lappin, M. J. Boyce, T. Matzow, S. Lociuro, M. Seymour, S. J. Warrington. A microdose study of 14C-AR-709 in healthy men: pharmacokinetics, absolute bioavailability and concentrations in key compartments of the lung. Eur. J. Clin. Pharmacol. 2013, 69, 1673-1682	AR-A014418. 100 ug dose, N=4, 70 kg assumed. Data digitized from plot (unchanged compound profile) reported and PK parameters calculated via PKSolver. Time point (but not concentration) corrected using text time point.		2005	534.99	10	3	145.8	7	neutral	3.5	3.3
Arbekacin	51025-85-5	O1[C@H](O[C@H]2[C@@H](C[C@@H]([C@H]([C@@H]2O)O[C@H]2O[C@@H](CC[C@H]2N)CN)N)NC([C@H](CCN)O)=O)[C@H](O)[C@H]([C@@H]([C@H]1CO)O)N	0.21	1.28		2.73	2.46	HIROMI KUMON, AKIHIRO MIZUNO, YOSHITSUGU NASU, MASAYA TSUGAWA, MIKIO KISHI and HIROYUKI OHMORI. PHARMACOKINETICS OF ARBEKACIN IN HEALTHY VOLUNTEERS AND PATIENTS WITH RENAL INSUFFICIENCY	HBK. N=3, healthy adults (CCr 100 mL/min). MRT from clearance and VDss, 70 kg average weight assumed.	renal clearance 1.12 mL.min-1.kg-1 (87%)	1973	552.62	16	11	297.3	10	cationic	-7.5	-9
Argatroban	74863-84-6	C[C@@H]1CCN([C@H](C1)C(=O)O)C(=O)[C@H](CCCNC(=N)N)NS(=O)(=O)c2cccc3CC(C)CNc23	0.17	5	0.46	0.57	0.4	Hauptmann, J. Pharmacokinetics of an emerging new class of anticoagulant/antithrombotic drugs A review of small-molecule thrombin inhibitors. Eur J Clin Pharmacol 2002, 57, 751-758. ppb: The PDR states: Argatroban is 54% bound to human serum proteins, with binding to albumin and α1 – acid glycoprotein being 20% and 34%, respectively. Accessed January 7 2015. http://www.pdr3d.com/detail.php?c=1353…			1980	508.63	11	6	177.7	10	zwitterionic	1.5	-0.84
Aripiprazole	129722-12-9	Clc1cccc(N2CCN(CCCCOc3ccc4CCC(=O)Nc4c3)CC2)c1Cl	4.9	0.83	0.01	98	75	Abilify Product Label.	CL value in FDA documents on-line.		1990	448.39	5	1	44.8	7	cationic	5.2	4.7
Artesunate	88495-63-0	C[C@@H]1CC[C@H]2[C@@H](C)[C@H](OC(=O)CCC(=O)O)O[C@@H]3O[C@@]4(C)CC[C@@H]1[C@@]23OO4	15	1070	0.25	0.32	0.22	Newton PN, Barnes KI, Smith PJ, Evans AC, Chierakul, W, Ruangveerayuth R, and WhiteNJ (2006) The pharmacokinetics of intravenous artesunate in adults with severe falciparum malaria. Eur. J. Clin. Pharmacol. 62: 1003-1009. Li Q, Xie LH, Haeberle A, Zhang J, and Weina P (2006) The evaluation of radiolabeled artesunate on tissue distribution in rats and protein binding in humans. Am. J. Trop. Med. H…			1982	384.42	8	1	100.5	5	neutral	3	2.9
Articaine	23964-58-1	s1c(C(OC)=O)c(NC([C@@H](C)NCCC)=O)c(c1)C	7.7	126.7	0.46	1.04	0.98	Vree, Torn B.; Simon, Marc A. M.; Gielen, Mathieu J. M.; Booij, Leo H. D. J. Regional metabolism of articaine in 10 patients undergoing intravenous regional anesthesia during day case surgery. British Journal of Clinical Pharmacology, 1997, 44, 29-34.//ppb: Oertel, Reinhard; Richter, K. Plasma protein binding of the local anesthetic drug articaine and its metabolite articainic acid. Pharmazie, 19…	Average weight reported as 70.5 kg. 200 mg dose, N=10. // ppb: In the range of 0.5-​5 μg​/mL articaine had a linear protein binding. Data at pH 7.5. Much higher binding (71%) at pH 8.5.		1969	284.37	5	2	67.4	7	cationic	1.9	1.2
Asarone	2883-98-9	c1(c(cc(OC)c(c1)OC)OC)\C=C\C	1	8.8		1.9	3.7	Yang, Zhenghong; Wu, Chuang. Absolute bioavailability of synthetic asarone in healthy volunteers. Zhongguo Yiyuan Yaoxue Zazhi (1997), 17(4), 165-167	Data digitized from plot reported. Reported data: 16 mg iv N=12 Avg BW = 58.8 kg AUC0~inf = 396±250 ng*h/mL (AUC calculated within range, 513 ng*h/mL)		1930	208.25	3	0	27.7	4	neutral	2.7	2.7
Ascorbic acid	50-81-7	[C@H]1(C(=C(C(=O)O1)O)O)[C@H](CO)O	0.35	1.05	0.26	5.5	11.4	Zetler, G. Seidel, G., Siegers, G-P, Iven. H. Pharmacokinetics of ascorbic acid in man. Eur. J. Clin. Pharmacol. 1976, 10, 273-282.// (L. John Hoffer, Line Robitaille, Robert Zakarian, David Melnychuk, Petr Kavan, Jason Agulnik,Victor Cohen, David Small Wilson H. Miller, Jr. High-Dose Intravenous Vitamin C Combined with Cytotoxic Chemotherapy in Patients with Advanced Cancer: A Phase I-II Clinica…	N=3, dosed as 500 mg of sodium ascorbate (435 mg of ascorbic acid). 79 kg average weight. Not clear whether lactone or acid was followed as the analysis was performed colorimetrically. Structure entered as lactone//Also, the work of Hoffer et al. PLoS was utilized for calculations after digitization. 0.6 g/kg over 90 minutes, N=12, 76 kg average weight. Only Cmax and C5.5 hr were reported (= Clas…		1923	176.12	6	4	107.2	2	anionic	-3	-5.5
Asenapine	65576-45-6	c12c(cccc1)Oc1ccc(cc1[C@@H]1[C@@H]2CN(C1)C)Cl	23	12.4	0.05	30.9		PDR. Accessed February 18 2013. http://www.pdr3d.com/detail.php?c=82606#section-14	SAPHRIS. Asenapine is a high clearance drug with a clearance after intravenous administration of 52 L/h. VDss 20-25 L/kg. 95% bound. 70 kg assumed.no t1/2 reported. MRT from VDss and clearance.		1985	285.77	2	0	12.5	0	cationic	4.7	3.1
Aspoxicillin	63358-49-6	N12[C@@H]([C@@H](NC([C@@H](c3ccc(O)cc3)NC([C@@H](CC(NC)=O)N)=O)=O)C2=O)SC(C)(C)[C@@H]1C(O)=O	0.27	2.82		1.61	1.45	F. KEES, K. G. NABER, H. GROBECKER. In-vitro-Aktivitat von Aspoxicillin und Pharmakokinetik bei Probanden. Zeitschrift fuer Antimikrobielle und Antineoplastische Chemotherapie, 1987, 5, 53-60.	4 g dose, N=10, median weight 72 kg. MRT from clearance and VDss.		1977	493.53	12	6	191.2	8	anionic	-1.7	-3.8
Astragaloside IV	84687-43-4	CC(C)(O)[C@@H]1CC[C@@](C)(O1)[C@H]2[C@@H](O)C[C@@]3(C)[C@@H]4C[C@H](O[C@@H]5O[C@H](CO)[C@@H](O)[C@H](O)[C@H]5O)[C@H]6C(C)(C)[C@H](CC[C@@]67C[C@@]47CC[C@]23C)O[C@@H]8OC[C@@H](O)[C@H](O)[C@H]8O	0.12	0.74	0.14	2.78	2.65	Pharmacokinetics and tolerance of toal astragalosides after intravenous infusion of astragalosides injection in healthy Chinese volunteers. Xu, Meijuan; Yin, Jungang; Xie, Liyan; Zhang, Jun; Zou, Chong; Zou, Jiandong; Liu, Fang; Ju, Wenzheng; Li, Ping Phytomed. 2013, 20, 1105-1111.// ppb: Xu, Duo; Liu, Mei; Yang, Bo; Yin, Qiong-yu; Lu, Yu. Determination of protein-​binding rate of adenosine and a…	N=6, 400 mL variable rate infusion (1 to 4 mL.min-1) infusion, of a 9 mg/100 mL solution, 36 mg total dose, 59.9 kg average weight. AUC 0-inf_obs reported 13. 59 μg/ml*h; AUC 0-inf_obs calculated 13. 49 μg/ml*h; < 1 % difference.		1982	784.97	14	9	228.2	6	neutral	-0.048	-0.048
Astromicin	55779-06-1	O1[C@@H]([C@@H](CC[C@H]1[C@@H](N)C)N)O[C@@H]1[C@H]([C@@H]([C@H](OC)[C@H](N(C)C(CN)=O)[C@H]1O)O)N	0.23	1.37		2.8	2	Nakashima, Mitsuyoshi; Takiguchi, Yoshiharu; Inoue, Akinobu; Kobayashi, Satoshi. Phase I study on intravenous drip infusion of astromicin. apanese Journal of Antibiotics. 1986, 39, 1453-1472.	KW-1070. 200 mg dose, N=6, Average weight 70.8 kg. 1 hr intravenous drip. VDss calculated from Vc and k12/k21 ratio. MRT = VDss/clearance.		1975	405.49	11	6	192.5	6	cationic	-4.6	-7.7
Asunaprevir	630420-16-5	COc1cnc(O[C@@H]2C[C@H](N(C2)C(=O)[C@@H](NC(=O)OC(C)(C)C)C(C)(C)C)C(=O)N[C@@]3(C[C@H]3C=C)C(=O)NS(=O)(=O)C4CC4)c5cc(Cl)ccc15	2.77	11.78	0.012	3.92	20	http://www.bmscanada.ca/static/products/en/pm_pdf/SUNVEPRA_E_PM.PDF. Accessed July 29 2016.//ppb: McPhee, Fiona; Sheaffer, Amy K.; Friborg, Jacques; Hernandez, Dennis; Falk, Paul; Zhai, Guangzhi; Levine, Steven; Chaniewski, Susan; Yu, Fei; Barry, Diana; et al. Preclinical profile and characterization of the hepatitis C virus NS3 protease inhibitor asunaprevir (BMS-650032). Antimicrobial Agents an…	70 kg average weight assumed. 100 ug iv tracer dose after 100 mg capsule p.o. MRT calculated from VDss and clearance. t1/2 median of range reported.		2003	748.29	14	3	182.3	12	anionic	5.5	2.4
Atenolol	29122-68-7	CC(C)NCC(O)COc1ccc(CC(=O)N)cc1	0.95	2.5	0.94	6.3	6.1	Mason WD, Winer N, Kochak G, Cohen I, and Bell R (1979) Kinetics and absolute bioavailability of atenolol. Clin. Pharmacol. Ther. 25: 408-415. Henry JA and Mitchell SN (1981) Effect of pH on human plasma protein binding of a series of .beta.-adrenoceptor antagonists. Br. J. Clin. Pharmacol. 11: 119P-120P.	VDss calculated from reported micro constants.		1970	266.34	5	3	84.6	8	cationic	0.35	-1.4
Atipamizole	104054-27-5	[nH]1cncc1C1(Cc2c(C1)cccc2)CC	2.7	19.6		2.3	1.7	SAKARI KARHUVAARA, ANTERO KALLIO, MIKA SCHEININ, MARKKU ANTTILA, JARMO S. SALONEN & HARRY SCHEININ. Pharmacological effects and pharmacokinetics of atipamezole, a novel 0L2-adrenoceptor antagonista randomized, double-blind cross-over study in healthy male volunteers. Br. J. clin. Pharmac. (1990), 30, 97-106	Data digitized from plot at 100 mg dose (linear PK). N=6, 73 kg average weight. N= 6, 73 kg average weight. Reported AUC = 1.19 mg.h.L-1; Clearance = 1.14 L.h-1.kg-1.		1986	212.29	2	1	28.7	2	neutral	2.6	2.4
Atomoxetine	83015-26-3	CNCC[C@@H](Oc1ccccc1C)c2ccccc2	0.85	9.3	0.02	1.5	5.2	Strattera Product Label	CYP2D6 EM data MRT is calculated as VD/CL; CL was calculated as CLpo/F (F=63%)		1982	255.35	2	1	21.3	6	cationic	3.6	1.5
Atovaquone	95233-18-4	OC1=C([C@@H]2CC[C@H](CC2)c3ccc(Cl)cc3)C(=O)c4ccccc4C1=O	0.6	0.15	0.001	67	63	Mepron Product Label			1984	366.84	3	1	54.4	2	anionic	5.5	3.4
Atracurium	64228-79-1	COc1ccc(CC2c3cc(OC)c(OC)cc3CC[N+]2(C)CCC(=O)OCCCCCOC(=O)CC[N+]4(C)CCc5cc(OC)c(OC)cc5C4Cc6ccc(OC)c(OC)c6)cc1OC	0.1	5.7	0.52	0.29	0.31	Cameron M, Donati F, and Varin F (1995) In vitro plasma protein binding of neuromuscular blocking agents in different subpopulations of patients. Anesth. Analg. 81: 1019-1025. deBros FM, Lai A, Scott R, deBros J, Batson AG, Goudsouzian N, Ali HH, Cosimi AB, and Savarese JJ (1986) Pharmacokinetics and pharmacodynamics of atracurium during isoflurane anesthesia in normal and anephric patients. Anes…	VDss calculated from estimated C vs t data from Cameron, et al, and from reprted microconstants from Ward, et al.		1980	929.15	14	0	126.4	26	neutral	1.7	1.7
Atropine	51-55-8	CN1[C@@H]2CC[C@H]1C[C@H](C2)OC(=O)C(CO)c3ccccc3	3.3	7.6	0.61	7.2	4.1	Adams RG, Verma P, Jackson AJ, and Miller RL (1982) Plasma pharmacokinetics of intravenously administered atropine in normal human subjects. J. Clin. Pharmacol. 22: 477-481. Kurz H, Mauser-Ganshorn A, and Stickel HH (1977) Differences in the binding of drugs to plasma proteins from newborn and adult man. I. Eur. J. Clin. Pharmacol. 11: 463-467.			1878	289.37	4	1	49.8	5	cationic	2.2	0.6
Avarofloxacin	878592-87-1	COc1c2c(cc(c1N3CCC/C(=C(/CN)\F)/C3)F)c(=O)c(cn2C4CC4)C(=O)O	1.13	0.78	0.34	24.21	19.64	J. Michael Davenport, Paul Covington, Mark Gotfried, Matthew Medlock, Prapoch Watanalumlerd, Gail McIntyre, Lisa Turner, and June Almenoff. Summary of Pharmacokinetics and Tissue Distribution of a Broad-Spectrum Fluoroquinolone, JNJ-Q2//ppb: G Eichenbaum, MK Pugsley, DJ Gallacher, R Towart, G McIntyre, U Shukla, JM Davenport, HR Lu, J Rohrbacher, and V Hillsamer. Role of mixed ion channel effects…	JNJ-Q2. Acorafloxacin. Data digitized from plot reported. 75 mg dose chosen as "bracketed by the range 15-150 mg. Generally linear PK. 70 kg average weight assumed. 90-minute infusion. AUC 0-inf reported as 25 ug.h.mL. Calculated 22.9 ug.h.mL. 9% difference. ppb midpoint of range: 62% at 2 ug/mL and 70% at 20 ug/mL.		2006	419.42	7	2	97.8	5	zwitterionic	2.8	0.44
Avibactam	1192500-31-4	N12C(=O)N([C@H](CC[C@H]1C(=O)N)C2)OS(=O)(=O)O	0.24	2.76	0.93	1.4	1.7	Riccobene, Todd A.; Su, Sheng Fang; Rank, Douglas. Single- and multiple-​dose study to determine the safety, tolerability, and pharmacokinetics of ceftaroline fosamil in combination with avibactam in healthy subjects. Antimicrobial Agents and Chemotherapy 2013, 57(3), 1496 –1504.//ppb: https://www.fda.gov/downloads/AdvisoryCommittees/CommitteesMeetingMaterials/Drugs/Anti-InfectiveDrugsAdvisoryCom…	600 mg dose. 1-hr Iv infusion. 70 kg weight assumed as average. Reported as 93% renally excreted.		2011	265.24	9	2	130.2	3	neutral	-2.1	-5.6
Avitriptan	151140-96-4	CNS(=O)(=O)Cc1ccc2c(c1)c(c[nH]2)CCCN3CCN(CC3)c4c(cncn4)OC	0.87	6.44		2.25	5.26	Marathe, P. H.; Greene, D. S.; Barbhaiya, R. H. Disposition of [14C]avitriptan in rats and humans. Drug Metab. and Disp. 1997, 25, 881-888	N=12, 10 mg infusion in 30'. MRT from VDss and clearance.		1993	458.58	9	2	103.4	9	cationic	2.1	1.4
Avosentan	290815-26-8	O=S(=O)(c1ncc(cc1)C)Nc1nc(c2ccncc2)nc(c1Oc1ccccc1OC)OC	0.27	0.52		8.8	7.2	Dieterle W, Hengelage T. Absolute bioavailability and pharmacokinetics of avosentan in man. Int. J. Clin. Pharmacol. Ther. 2009, 47, 587-594.	Data calculated after digitization of plot. 10 mg dose, 70-kg weight assumed. 20' infusion N=25. AUC reported 4696 ng.h.mL-1 vs. a calculated value of 4581 ng.h.mL-1.		2000	479.51	10	1	125.4	8	anionic	3.5	0.026
Axitinib	319460-85-0	CNC(=O)c1ccccc1Sc2ccc3c(c2)[nH]nc3/C=C/c4ccccn4		5	0.004		4.3	http://www.accessdata.fda.gov/drugsatfda_docs/nda/2012/202324Orig1s000ClinPharmR.pdf. Accessed on September 26 2015.	t1/2 reported as a range 2.5-6.1 h. Mid-point taken. VD reported as 68 L but not specified as VDbeta or VDss. 70 kg assumed. 1 mg iv dose.		2011	386.47	5	2	70.7	5	neutral	4	4
Azacytidine	320-67-2	NC1=NC(=O)N(C=N1)[C@@H]2O[C@H](CO)[C@@H](O)[C@H]2O	0.47	35		0.22	0.36	Marcucci G, Silverman L, Eller M, Lintz L, and Beach CL (2005) Bioavailability of azacitidine subcutaneous versus intravenous in patients with the myelodysplastic syndromes. J. Clin. Pharmacol. 45: 597-602.	VDss was calculated using C vs t data obtained by digitization of the plot provided in the reference.		1964	244.2	9	4	141	2	neutral	-3	-3
Azapropazone	13539-59-8	CCCC1C(=O)N2N(C1=O)c3cc(C)ccc3N=C2N(C)C	0.12	0.14	0.004	14	17	Gikalov I, Kaufmann R, and Schuster O (1982) Humanpharmakokinetik verschiedener i.v. dosen von azapropazon (HPLC-bestimmung). Arzn. Forsch. 32: 423-426.	VDss was calculated from C vs t data provided in the reference.		1966	300.36	6	0	56.2	3	anionic	1.3	0.098
AZD4877	1176760-49-8	Cc1ccc(cc1)C(=O)N(CCCN)C(c2nc3c(c(ns3)C)c(=O)n2Cc4ccccc4)C(C)C	6.74	5.83		19	16.3	A Phase I study to assess the safety, tolerability, and pharmacokinetics of AZD4877, an intravenous Eg5 inhibitor in patients with advanced solid tumors Infante J R; Kurzrock R; Spratlin J; Burris H A; Eckhardt S G; Li J; Wu K; Skolnik J M; Hylander-Gans L; Osmukhina A; Huszar D; Herbst R S. Cancer chemotherapy and pharmacology 2012, 69 (1)165-72	Weighted average of data reported in table 4. Part A and B across all doses with data reported (range 5-45 mg). T/12 across 20 patients, MRT, Cl and VDss across 17 patients. Average data : clearance 24.5 L/h, VDss = 471.8 L, MRT 19.05 h and t1/2 16.3 hours. Average of 70 kg used for body weight.		2004	503.66	7	1	94.1	9	cationic	3.6	1.1
Azelastine	58581-89-8	CN1CCCC(CC1)N2N=C(Cc3ccc(Cl)cc3)c4ccccc4C2=O	15	9	0.17	27	22	Weliky I, Howard JR, and Wichmann JK (1990) Absolute bioavailability and pharmacokinetics of azelastine. Pharm. Res. 7: S-247. Estelle F, Simons R, and Simons KJ (1999) Clinical pharmacology of new histamine H1 receptor antagonists. Clin. Pharmacokinet. 36: 329-352.			1980	381.9	4	0	35.9	3	cationic	3.8	2.4
Azimilide	149908-53-2	CN1CCN(CCCCN2C(=O)CN(\N=C\c3oc(cc3)c4ccc(Cl)cc4)C2=O)CC1	13	2.4	0.06	100	79	Corey AE, Agnew JR, Valentine SN, Nesbitt JD, Wagner DL, Powell JH, and Thompson GA (1999) Azimilide pharmacokinetics following intravenous and oral administration of a solution and capsule formulation. J. Clin. Pharmacol. 39: 1272-1276.			1993	457.95	8	0	72.9	8	cationic	3.5	2.2
Azithromycin	83905-01-5	CC[C@H]1OC(=O)[C@H](C)[C@@H](O[C@H]2C[C@@](C)(OC)[C@@H](O)[C@H](C)O2)[C@H](C)[C@@H](O[C@@H]3O[C@H](C)C[C@@H]([C@H]3O)N(C)C)[C@](C)(O)C[C@@H](C)CN(C)[C@H](C)[C@@H](O)[C@]1(C)O	33	10	0.88	57	69	Luke DR, Foulds G, Cohen SF, and Levy B (1996) Safety, toleration, and pharmacokinetics of intravenous azithromycin. Antimic. Agents Chemother. 40: 2577-2581. Foulds G, Shepard RM, and Johnson RB (1990) The pharmacokinetics of azithromycin in human serum and tissues. J. Antimic. Chemother. 25(Suppl. A): 73-82.	Protein binding is concentration dependent; cited value measured at concentrations observed after IV dosing.		1953	748.98	14	5	180.1	7	cationic	2.2	-0.18
Azlocillin	37091-66-0	CC1(C)S[C@@H]2[C@H](NC(=O)[C@H](NC(=O)N3CCNC3=O)c4ccccc4)C(=O)N2[C@H]1C(=O)O	0.26	2.5	0.65	1.7	1.2	Haen E, Remien J, Richter E, Frank U, and Adam D (1985) Uber die bedeutung der applikationsgeschwindigkeit fur die pharmakokinetischen parameter von azlocillin und mexlocillin. Arz. Forsch. 35: 864-868. Bergan T (1984) Pharmacokinetics of beta-lactam antibiotics. Scand. J. Infect. Dis. 42(Suppl): 83-98.	Pharmacokinetic parameters were calculated from C vs t data provided in the reference.		1972	461.49	11	4	148.1	5	anionic	0.84	-2.5
Aztreonam	78110-38-0	C[C@H]1[C@H](NC(=O)\C(=N/OC(C)(C)C(=O)O)\c2csc(N)n2)C(=O)N1S(=O)(=O)O	0.18	1.5	0.4	2.1	1.5	Burgess DS, Summers KK, and HardinTC (1999) Pharmacokinetics and pharmacodynamics of aztreonam administered by continuous intravenous infusion. Clin. Ther. 21: 1882-1889. Swabb EA, Sugerman A, Frantz M, Platt TB, and Stern M (1983) Renal handling of the monobactam azthreonam in healthy subjects. Clin. Pharmacol. Ther. 33: 609-614.			1981	435.43	13	4	201.6	7	anionic	-0.95	-6.2
Baclofen	1134-47-0	c1cc(ccc1C(CC(=O)O)CN)C	0.65	1.7	0.69	6.36	5.24	Suresh K. Agarwal, Robert L. Kriel, James C. Cloyd, Lisa D. Coles, Lisa A. Scherkenbach, Michael H. Tobin and Linda E. Krach. Pilot Study Assessing Pharmacokinetics and Tolerability of Oral and Intravenous Baclofen in Healthy Adult Volunteers. J Child Neurol published online 14 July 2014. DOI: 10.1177/0883073814535504. ppb (UF method): Wuis EW, Dirks MJ, Termond EF, Vree TB, Van der Kleijn E. 198…	N=12, digitized from plot reported. 5 mg dose. 70 kg average weight assumed.		1962	193.24	3	2	63.3	4	zwitterionic	1.1	-1.2
Bambuterol	81732-65-2	CN(C)C(=O)Oc1cc(OC(=O)N(C)C)cc(c1)C(O)CNC(C)(C)C	1.6	18		1.4	2.6	Nyberg L, Rosenborg J, Weibull E, Jonsson S, Kennedy BM, and Nilsson M (1998) Pharmacokinetics of bambuterol in healthy subjects. Br. J. Clin. Pharmacol. 45: 471-478.			1982	367.44	8	2	91.3	7	cationic	1.3	-0.27
Basimglurant	802906-73-6	Cc1c(nc(n1c2ccc(cc2)F)C)C#Cc3ccnc(c3)Cl	9.7	2.8	0.01	57.4	78.9	Elena Guerini, Simone Schadt, Gerard Greig, Ruth Haas, Christophe Husser, Manfred Zell, Christoph Funk, Thomas Hartung, Andreas Gloge, and Navita L. Mallalieu. A double-tracer technique to characterize absorption, distribution, metabolism and excretion (ADME) of [14C]-basimglurant and absolute bioavailability after oral administration and concomitant intravenous microdose administration of [13C6]…	100 ug dose as radiotracer of 13C6-basimglurant, via 30' infusion. N=6, 70 kg average weight assumed. MRT from VDss and clearance.		2004	325.77	3	0	30.7	3	neutral	4	4
Batanopride	102670-46-2	c1(c(cc(Cl)c(c1)N)C(NCCN(CC)CC)=O)O[C@@H](C(C)=O)C	1.5	9.32	0.46	2.68	2.7	J. V. St. Peter, M. E. Brady, E. E Foote, K.A. Dandekar, L. Smaldone, J. L. Pykkonen, W. E Keane, and C. E. Halstenson. The disposition and protein binding of batanopride and its metabolites in subjects with renal impairment. Eur J Clin Pharmacol (1993) 45:59-53	N=13 (8M/5F) 78 kg average weight reported, 3.6 mg/kg 15 minutes i.v. infusion. Normal subjects only. MRT from clearance and VDss.		1986	355.86	6	2	84.7	9	cationic	1.7	0.15
Batifiban	710312-77-9	[C@@H]12N(C(=O)[C@H](Cc3c4c([nH]c3)cccc4)NC(=O)[C@@H](NC(=O)CNC(=O)[C@@H](NC(=O)CCSSC[C@H](NC1=O)C(=O)N)CCCNC(=N)N)CC(=O)O)CCC2	0.42	2.88		2.45	2.12	Chen, Hui; Qiao, Jian; Li, Qian; Deng, Jungang; Tan, Zhirong; Guo, Tao; Li, Weiyong. Safety, pharmacokinetic and pharmacodynamic studies of batifiban injection following single- and multiple dose administration to healthy Chinese subjects. Journal of Huazhong University of Science and Technology, Medical Sciences 2009, 29, 12-18.	N=12, 220 ug/kg dose iv bolus (highly linear AUC across 3 doses) 58.3 kg average weight, calculation performed via PK solver. AUC reported 1374 ug.h.L-1, calculated 1271 ug.h.L-1, 8% difference.		2003	817.94	20	11	323.9	10	zwitterionic	-3.7	-6
Bazedoxifene	198481-32-2	c1cc2n(c(c3ccc(cc3)O)c(c2cc1O)C)Cc1ccc(OCCN2CCCCCC2)cc1	15.4	6.7	0.02	37.5	30	EMA approval package. https://www.pharmapendium.com/emea.do?document=4c0872d79ea3bbd57566034c1b98c34e&drugName=Bazedoxifene+acetate&reference=17. Accessed 06-13-2014.	Study conducted solely in post-menopausal women. MRT from clearance and VDss. Median fu taken from two values reported.		1999	470.6	5	2	57.9	7	cationic	6.6	5.5
BB 83698	325795-25-3	CC(C)(C)[C@H](NC(=O)[C@H](CC1CCCC1)CN(O)C=O)C(=O)N2CCN(Cc3ccc4OCOc4c3)CC2	1.1	3.1	0.2	5.9	9.4	Ramanathan-Girish S, McColm J, Clements JM, Taupin P, Barrowcliffe S, Hevizi J, Safrin S, Moore C, Patou G, Moser H, Gadd A, Hoch U, Jiang V, Lofland D, and Johnson KW. Pharmacokinetics in animals and humans of a first-in-class peptide deformylase inhibitor. Antimic. Agents Chemother. (2004) 48: 4835-4842.			2001	530.66	10	2	111.6	9	neutral	2.1	2.1
Becatecarin	119673-08-4	n1([C@H]2[C@@H]([C@@H](O)[C@@H]([C@H](O2)CO)OC)O)c2c3c(c4C(=O)N(C(c4c2c2c1c(Cl)ccc2)=O)CCN(CC)CC)c1cccc(c1[nH]3)Cl	8.9	3.13		45.4	48.9	Anthony W. Tolcher, S. Gail Eckhardt, John Kuhn, Lisa Hammond, Geoffrey Weiss, Jinee Rizzo, Cheryl Aylesworth, Manuel Hidalgo, Amita Patnaik, Garry Schwartz, Sally Felton, Elizabeth Campbell, and Eric K. Rowinsky. Phase I and Pharmacokinetic Study of NSC 655649, a Rebeccamycin Analog With Topoisomerase Inhibitory Properties. Journal of Clinical Oncology, 2001, 19, 2937-2947.	NSC655649. BMS 181176. N= 43 total, doses from 20 a 744 mg/m2. Data reported here as weighted average across all doses in Table 5.		1988	669.55	11	4	140.5	8	cationic	3	2.5
Beclabuvir	958002-33-0	CN1C[C@H]2CC[C@@H](C1)N2C(=O)[C@]34C[C@H]3c5cc(ccc5-c6c(c7ccc(cc7n6C4)C(=O)NS(=O)(=O)N(C)C)C8CCCCC8)OC	0.5	1.33	0.01	6.38	5.38	Hao Jianga, Craig Titsch, Jianing Zenga, Barry Jones, Philip Joyce, Yash Gandhi,Wesley Turley, Richard Burrell, Anne F. Aubry, Mark E. Arnold. Overcoming interference with the detection of a stable isotopically labeled microtracer in the evaluation of beclabuvir absolute bioavailability using a concomitant microtracer approach. J. Pharm. Biomed. Anal. 2017, 143, 9–16.//ppb : Nicholas A. Meanwell.…	BMS-791325. 70 kg average weight assumed. MRT from clearance and VDss. Micro-dose (100 g) of the stable isotopically labeled tracer via intravenous (IV) infusion started after oral dosing of beclabuvir (150 mg) and at about Tmax.		2007	659.84	10	1	104.2	6	zwitterionic	3.1	0.74
Beclomethasone dipropionate	5534-09-8	CCC(=O)OCC(=O)[C@@]1(OC(=O)CC)[C@@H](C)C[C@H]2[C@@H]3CCC4=CC(=O)C=C[C@]4(C)[C@@]3(Cl)[C@@H](O)C[C@]12C	0.29	36	0.13	0.1	0.5	Daley-Yates PT, Price AC, Sisson JR, Pereira A, and Dallow N (2001) Beclomethasone dipropionate: absolute bioavailability, pharmacokinetics and metabolism following intravenous, oral, intranasal and inhaled administration in man. Br. J.. Clin. Pharmacol. 51: 400-409. Beconase AQ Product Label			1964	521.04	7	1	107	8	neutral	4	4
Belinostat	414864-00-9	c1c(cccc1\C=C\C(NO)=O)S(=O)(=O)Nc1ccccc1	0.8	23.6	0.06	0.6	1.6	U Lassen, LR Molife, M Sorensen, S-A Engelholm, L Vidal, R Sinha, RT Penson, P Buhl-Jensen, E Crowley, J Tjornelund, P Knoblauch, JS de Bono. Phase I trial of belinostat with carboplatin and/or paclitaxel. British Journal of Cancer (2010) 103, 12 – 17. ppb: The PDR states: In vitro plasma studies have shown that between 92.9% and 95.8% of belinostat is bound to protein in an equilibrium dialysis …	Belinostrat administrated in combination with carboplatin and/or paclitaxel. MRT calculated form VDss and CL. VDss and CL corrected with 1.73 m2/70 kg body surface/body weight factor. (see table II in ref. cited). N=30 (23 patients. For 7of them day 1 and day 3 PK profiles are available)		2002	318.35	6	3	95.5	5	neutral	1.5	1.4
Bendamustine	16506-27-7	c12n(C)c(CCCC(=O)O)nc1cc(N(CCCl)CCCl)cc2	0.22	4.49	0.05	0.81	0.41	Ogura et al. Phase I and pharmacokinetic study of bendamustine hydrochloride in relapsed or refractory indolent B-cell non-Hodgkin lymphoma and mantle cell lymphoma. Cancer Science, 2010, 101, 2054-2058. ppb: The PDR states: In vitro, the binding of bendamustine to human serum plasma proteins ranged from 94-96% and was concentration independent from 1-50 μg/mL. Accessed January 2 2015. http://www…	Plasma data with time point adjusted to match the reported times. N=6, 70 kg average weight assumed, 120 mg/m2 dose (= 2.96 mg/kg, using 1.73 m2/70 kg conversion), 1-hr infusion.		1973	358.26	5	1	58.4	9	zwitterionic	3	0.65
Benperidol	2062-84-2	Fc1ccc(cc1)C(=O)CCCN2CCC(CC2)N3C(=O)Nc4ccccc34	3.8	8.3		7.5	5.8	Seiler W, Wetzel H, Hillert A, Schoellnhammer G, Langer M, Barlage U, and Hiemke C (1994) Pharmacokinetics and bioavailability of benperidol in schizophrenic patients after intravenous and two different kinds of oral application. Psychopharmacology 116: 457-463.			1961	381.44	5	1	52.6	6	cationic	3.7	2.9
Benzydamine	642-72-8	c1(OCCCN(C)C)c2c(n(n1)Cc1ccccc1)cccc2	1.53	2.28	0.8	11.4	8.1	G. A. BALDOCK, R. R. BRODIE, L. F. CHASSEAUD, T. TAYLOR AND L. M. WALMSLEY. PHARMACOKINETICS OF BENZYDAMINE AFTER INTRAVENOUS, ORAL, AND TOPICAL DOSES TO HUMAN SUBJECTS. BIOPHARMACEUTICS & DRUG DISPOSITION, 1991, 12, 481-492.//ppb: Chasseaud LF, Catanese B. Pharmacokinetics of benzydamine. Int J Tissue React. 1985, 7, 195-204.	Benzidamine. N=6 (male subject) 70 kg average weight reported, 5 mg dose		1964	309.41	4	0	30.3	7	cationic	4.2	0.76
Bepridil	64706-54-3	N(c1ccccc1)(C[C@@H](N1CCCC1)COCC(C)C)Cc1ccccc1	10.1	8.7	0.001	19.3	14.9	Pharmacokinetics of intravenous bepridil in patients with coronary disease By Lesko, Lawrence J.; Benotti, Joseph R.; Alpert, Joseph S.; Brady, Priscilla M.; McCue, Jane E.; Weiner, Bonnie H.; Ockene, Ira S. From Journal of Pharmaceutical Sciences (1986), 75(10), 952-4. ppb: NIGEL J. WATERS, RACHEL JONES, GARETH WILLIAMS, BINDI SOHAL (2008). Validation of a Rapid Equilibrium Dialysis Approach for…	MRT= VDss/CL. N=10. All patients with normal baseline hemodynamic and renal functions. Plots available.		1977	366.54	3	0	15.7	10	cationic	5.4	4.9
Berubicin	677017-23-1	C[C@H]1[C@H]([C@H](C[C@@H](O1)O[C@H]2C[C@@](Cc3c2c(c4c(c3O)C(=O)c5cccc(c5C4=O)OC)O)(C(=O)CO)O)N)OCc6ccccc6	48	18.5		43.2	34.6	R. Kazerooni, C. Conrad, C. Baud, M. Johansen, N. Thapar, C. Meyer, W. Priebe, and T. Madden. Phase I clinical pharmacokinetics of RTA 744: A blood brain barrier penetrating anthracycline active against high-grade glioma. Journal of Clinical Oncology, 2007 ASCO Annual Meeting Proceedings (Post-Meeting Edition).Vol 25, No 18S (June 20 Supplement), 2007: 2045	Also known as RTA 744. CAS number refers to free base. N=20. Dose range: 1.2 to 9.6 mg/m2. 1.73 m2/70 kg		2004	633.64	12	5	195.1	8	cationic	2.5	-0.07
Betamethasone	378-44-9	C[C@H]1C[C@H]2[C@@H]3CCC4=CC(=O)C=C[C@]4(C)[C@@]3(F)[C@@H](O)C[C@]2(C)[C@@]1(O)C(=O)CO	1.3	2.8	0.36	7.9	5.6	Petersen MC, Nation RL, McBride WG, Ashley JJ, and Moore RG (1983) Pharmacokinetics of betamethasone in healthy adults after intravenous administration. Eur. J. Clin. Pharmacol. 25: 643-650.	VDss was calculated using C vs t data obtained by digitization of the plot provided in the reference.		1960	392.46	5	3	94.8	2	neutral	1.7	1.7
Betamipron	3440-28-6	OC(=O)CCNC(=O)c1ccccc1	0.28	9.2	0.17	0.51	0.59	Saito A (1991) Pharmacokinetics of panipenem/betamipron. Chemotherapy (Tokyo) 39(Suppl. 3): 227-235. Kurihara A, Naganuma H, Hisaoka M, Tokiwa H, and Kawahara Y (1992) Prediction of human pharmacokinetics of panipenem-betamipron, a new carbapenem, from animal data. Antimic. Agents Chemother. 36: 1810-1816.	VDss calculated from C vs t data provided in the reference.		1920	193.2	4	2	66.4	4	anionic	0.56	-2.5
Betaxolol	63659-18-7	CC(C)NCC(O)COc1ccc(CCOCC2CC2)cc1	4.8	3.4	0.4	24	17	Ludden TM, Boyle DA, Gieseker D, Kennedy GT, Crawford MH, Ludden LK, and Clementi WA (1988) Absolute bioavailability and dose proportionality of betaxolol in normal healthy subjects. J. Pharm. Sci. 77: 779-783. Henry JA and Mitchell SN (1981) Effect of pH on human plasma protein binding of a series of .beta.-adrenoceptor antagonists. Br. J. Clin. Pharmacol. 11: 119P-120P.			1977	307.43	4	2	50.7	11	cationic	2.6	0.81
Bevantolol	59170-23-9	COc1ccc(CCNCC(O)COc2cccc(C)c2)cc1OC	0.67	5.5	0.015	2	1.9	McNeil JJ, Drummer OH, Anderson AIE, and Louis WJ (1986) Pharmacokinetics and concentration-effect relationships of bevantolol (CI-775) in normal volunteers. J. Cardiovasc. Pharmacol. 8: 1201-1207. Ichikawa M, Haruki S, Esumi Y, Takaichi M, Seki H, and Shiina M (1992) Metabolic fate of bevantolol hydrochloride. Absorption, distribution and excretion in rats and dogs after single oral administrati…	VDss calculated from reported microconstants.		1976	345.43	5	2	59.9	10	cationic	2.9	1.9
BI2536	755038-02-9	c12c(N(C(=O)[C@H](N1C1CCCC1)CC)C)cnc(n2)Nc1c(cc(C(=O)NC2CCN(CC2)C)cc1)OC	31.2	17.1		31.3	40.1	Peter M. Ellis, Quincy S. Chu, Natasha Leighl, Scott A. Laurie, Holger Fritsch, Birgit Gaschler-Markefski, Steve Gyorffy, Gerd Munzert.A Phase I Open-Label Dose-Escalation Study of Intravenous BI 2536 Together With Pemetrexed in Previously Treated Patients With Non–Small- Cell Lung Cancer. Clinical Lung Cancer, Vol. 14, No. 1, 19-27, 2013	Weighted average of 26 patients across six doses (Table 5) from 100 to 325 mg, administered as 1 hour infusion. 70 kg average weight assumed.		2004	521.65	10	2	102.9	7	cationic	4.3	2.8
Biapenem	120410-24-4	C[C@@H](O)[C@@H]1[C@H]2[C@@H](C)C(=C(N2C1=O)C(=O)[O-])SC3C[n+]4cncn4C3	0.2	2.5	0.92	1.3	1.1	Shiba K, Maezawa H, Yoshida M, Sakai O, and Saito A (1994) Basic and clinical studies of biapenem. Chemotherapy 42(Suppl. 4): 322-329. Yamashita N, Kawashima K, Nomura K, Takeuchi H, Hikida M, and Naruke T (1994) Pharmacokinetics of biapenem in laboratory animals. Chemotherapy 42(Suppl. 4): 243-250.			1986	350.39	8	1	102.4	4	anionic	-3.1	-5.4
Bidisomide	103810-45-3	[H]N([H])C([C@](CCN1CCCCC1)(CCN(C(C)C)C(C)=O)c1ccccc1[Cl])=O	2.6	5.43		7.9	12	Cook, Chyung S.; Ames, Gregory B.; Smith, Margaret E.; Kowalski, Kenneth G.; Karim, Aziz. Absorption and disposition of a new antiarrhythmic agent bidisomide in man. Pharmaceutical Research, 1993, 10 (11), 1675-1682.	Data from 1 mg/kg 20 min iv infusion, N=6, 70 kg average weight. t½ taken as the γ phase		1986	407.98	5	1	66.6	9	cationic	2.9	1.8
Bilastine	202189-78-4	C(C(C)(c1ccc(cc1)CCN1CCC(CC1)c1nc2c(n1CCOCC)cccc2)C)(=O)O	0.61	2.87	0.13	3.56	5.16	B. Sádaba, A. Gómez-Guiu, J. R. Azanza, I. Ortega, R. Valiente. Oral Availability of Bilastine. Clin Drug Investig 2013, 33, 375–381.//ppb: Erminia Ridolo,Marcello Montagni, Laura Bonzano, Cristoforo Incorvaia, and Giorgio Walter Canonica. Bilastine: new insight into antihistamine treatment. Clin. Mol. Allergy.2015, 13, 1-6.	N=12 healthy volunteers, 65.9 kg average, 10 mg dose. BA 61%. Data digitized and PK parameters calculated via PKSolver. AUCinf normalized reported 82.23 ng.h.mL-1.mg-1. Calculated, 87.94 ng.h.mL-1.mg-1. 7% difference. % renal clearance from ratio of clearances 72.8%		1998	463.61	6	1	67.6	10	zwitterionic	4.2	1.3
Bilobalide	33570-04-6	CC(C)(C)C1(O)CC2OC(=O)CC23C(=O)OC4OC(=O)C(O)C134	2.5	10		4	3.2	Fourtillian JB, Brisson AM, Girault J, Ingrand I, Decourt JP, Drieu K, Jouenne P, and Biber A (1995) Proprietes pharmaccinetiques du bilobalide et des ginkgolides A et B chez le sujet sain apres administrations intraveineuses et orales d'extrait de Ginkgo biolba (EGb 761). Therapie 50: 137-144.			1971	326.3	8	2	119.4	0	neutral	-3.4	-3.4
Bimatoprost	155206-00-1	C(\[C@@H]1[C@H]([C@@H](O)C[C@H]1O)C\C=C/CCCC(=O)NCC)=C\[C@H](CCc1ccccc1)O	0.67	25	0.12		0.45	PDR. Accessed February 18 2013. http://www.pdr3d.com/detail.php?c=85286#section-10	Clearance in blood but no B/P reported. MRT not yet calculable. Following an intravenous dose of radiolabeled bimatoprost (3.12 mcg/kg) to six healthy subjects, the maximum blood concentration of unchanged drug was 12.2 ng/mL and decreased rapidly with an elimination half-life of approximately 45 minutes. The total blood clearance of bimatoprost was 1.5 L/hr/kg. Up to 67% of the administered dose…		1994	415.57	5	4	89.8	12	neutral	3.3	3.3
Binodenoson	144348-08-3	c1nc2c(nc(nc2n1[C@H]3[C@@H]([C@@H]([C@H](O3)CO)O)O)N/N=C/C4CCCCC4)N	0.4	35.8		0.19	0.21	Richard J. Barrett, PhD, Michael J. Lamson, PhD, James Johnson, PhD, William B. Smith, MD, FACC. Pharmacokinetics and safety of binodenoson after intravenous dose escalation in healthy volunteers. Journal of Nuclear Cardiology, 2005, Volume 12, Number 2;166-171	Data digitized from plot (3 ug/kg) reported. N=6, 75.6 kg average (overall) weight. 10 minutes infusion. AUCinf calculated within 2% of AUCinf reported.		1992	391.42	11	5	163.9	5	cationic	-0.18	-0.18
Biolimus A9	851536-75-9	O=C1N2[C@H](C(=O)O[C@H]([C@@H](C[C@H]3C[C@@H](OC)[C@@H](CC3)OCCOCC)C)CC(=O)[C@H](C)/C=C(\C)/[C@@H](O)[C@@H](OC)C(=O)[C@@H](C[C@@H](/C=C/C=C/C=C(/[C@H](C[C@H]3O[C@](C1=O)(O)[C@H](C)CC3)OC)\C)C)C)CCCC2	44.5	12.2		60.9	93.9	Randomized, double-blind, placebo-controlled, single intravenous dose-escalation study to evaluate the safety, tolerability, and pharmacokinetics of the novel coronary smooth muscle cell proliferation inhibitor biolimus A9 in healthy individuals . Steudel, Wolfgang; Dingmann, Colleen; Zhang, Yan-Ling; Bendrick-Peart, Jamie; Clavijo, Claudia; Shulze, John; Betts, Ronald; Christians, Uwe Journal of…	Umirolimus. Non linear PK. Highest tolerated dose used (0.075 mg/kg, N=5). VDss calculated from Clearance (0.73 L/h/kg) and MRT (60.9 h) Umirolimus		2005	986.28	15	2	193.7	11	neutral	6.7	6.7
Biperiden	514-65-8	OC(CCN1CCCCC1)(C2CC3CC2C=C3)c4ccccc4	12	12	0.097	17	24	Grimaldi R, Perucca E, Ruberto G, Gelmi C, Trimarchi F, Hollmann M, and Crema A (1986) Pharmacokinetic and pharmacodynamic studies following the intravenous and oral administration of the antiparkinsonian drug biperiden to normal subjects. Eur. J. Clin. Pharmacol. 29: 735-737. Nakashima E, Yokogawa K, Ichimura F, Kurata K, Kido H, Yamaguchi N, and Yamana T (1987) A physiologically based pharmacok…			1955	311.46	2	1	23.5	5	cationic	4.4	2.5
Biricodar	159997-94-1	N1([C@@H](CCCC1)C(=O)OC(CCCc1cnccc1)CCCc1cnccc1)C(=O)C(c1cc(c(c(c1)OC)OC)OC)=O	1.34	8.5		2.62	1.1	Ronald A. Peck, Jan Hewett, Matthew W. Harding, Yow-Ming Wang, Pravin R. Chaturvedi, Anish Bhatnagar, Harvey Ziessman, Frank Atkins, and Michael J. Hawkins. Phase I and Pharmacokinetic Study of the Novel MDR1 and MRP1 Inhibitor Biricodar Administered Alone and in Combination With Doxorubicin. Journal of Clinical Oncology, 2001, Vol 19, 3130-3141	VX-710 COMBINED DATA FROM TABLE 6. MRT from VDss and Clearance There were no differences in VX-710 pharmacokinetic parameter values between the VX-710 single-agent infusion cycle and the combination therapy cycle (VX-710–doxorubicin), as shown in Fig 3, where selected pharmacokinetic parameters of VX-710 from all patients were plotted by cohorts. VX-710 has linear pharmacokinetics as indicated by…		1994	603.71	10	0	117.1	16	neutral	5.4	5.4
Bisaramil	89194-77-4	CCN1C[C@H]2CN(C)C[C@@H](C1)C2OC(=O)c3ccc(Cl)cc3	9	17		8.8	8.6	Gemesi L, Kapas M, Matos L (1993) Pharmacokinetic study of bisaramil in man. Acta Pharm. Hungarica 63: 327-333.	VDss calculated from reported C vs t data table.		1982	322.83	4	0	32.8	4	cationic	3.3	1.8
Bisoprolol	66722-44-9	CC(C)NCC(O)COc1ccc(COCCOC(C)C)cc1	2.4	3.7	0.66	11	10	Horikiri Y, Suzuki T, and Mizobe M (1998) Pharmacokinetics and Metabolism of Bisoprolol Enantiomers in Humans. J. Pharm. Sci. 87: 289-294. Leopold G, Pabst J, Ungethuem W, and Buehring KU (1986) Basic pharmacokinetics of bisoprolol, a new highly beta1-selective adrenoceptor antagonist. J. Clin. Pharmacol. 26: 616-621.	VDss calculated from C vs t data obtained by digitization of the plot provided by Leopold et al.		1978	325.44	5	2	59.9	12	cationic	2.2	0.46
Bivalirudin	128270-60-0	C([C@H]1N(CCC1)C([C@@H](Cc1ccccc1)N)=O)(=O)N[C@H](C(N1[C@H](C(=O)NCC(=O)NCC(NCC(=O)NCC(=O)N[C@H](C(NCC(=O)N[C@H](C(N[C@H](C(N[C@H](C(N[C@H](C(N[C@H](C(=O)N2[C@@H](CCC2)C(=O)N[C@H](C(N[C@H](C(N[C@@H](Cc2ccc(O)cc2)C(N[C@@H](CC(C)C)C(=O)O)=O)=O)CCC(O)=O)=O)CCC(O)=O)[C@H](CC)C)=O)CCC(O)=O)=O)CCC(O)=O)=O)Cc2ccccc2)=O)CC(O)=O)=O)CC(=O)N)=O)CCC1)=O)CCCNC(N)=N	0.27	8.1	1	0.43	0.42	Guixiang Pana, Xiaoming Wang, Yuhong Huang, Xiumei Gao, Yuefei Wang. Development and validation of a LC–MS/MS method for determination of bivalirudin in human plasma: Application to a clinical pharmacokinetic study J.Pharm. Biomed. Anal.. 2010, 52 105–109.//CHA IDong, WANG Rui, BA INan, CA IYun LIANG B ei- bei. Pharmacokinetics of bivalirudin injections in Chinese healthy volunteers. Chin. J. Cli…	Weighted average of data from both papers. N=9 (pana et al) and N=36 (Chai et al.) Doses from 0.5 to 1.05 mg/kg infusion//ppb from fda label. Bivalirudin does not bind to plasma proteins (other than thrombin) or to red blood cells.		1990	2180.29	57	28	901.6	67	anionic	-6.6	-9
Bizelesin	129655-21-6	c12c(N(C(c3cc4cc(NC(Nc5cc6c([nH]c(c6)C(N6c7c(c8c([nH]cc8C)c(c7)O)[C@@H](C6)CCl)=O)cc5)=O)ccc4[nH]3)=O)C[C@H]2CCl)cc(O)c2c1c(c[nH]2)C	0.05	0.5		1.7	1.6	Pitot, Henry C.; Reid, Joel M.; Sloan, Jeff A.; Ames, Matthew M.; Adjei, Alex A.; Rubin, Joseph; Bagniewski, Pamela G.; Atherton, Pamela; Rayson, Daniel; Goldberg, Richard M; Erlichman, Charles. A phase I study of bizelesin (NSC 615291) in patients with advanced solid tumors. Clin. Cancer Res. 2002, 8, 712-717.	Weighted average over 17 patients with doses ranging from 0.1 ug/m2 to 1 ug/m2. 1.73m2/70 kg conversion factor used.		1990	815.7	13	8	185.4	6	neutral	5.9	5.9
Bleomycin	11056-06-7	O([C@H]([C@H](NC(c1nc([C@@H](NC[C@@H](C(N)=O)N)CC(N)=O)nc(c1C)N)=O)C(N[C@@H]([C@H]([C@@H](C(N[C@H](C(NCCc1nc(c2nc(C(NCCC[S+](C)C)=O)cs2)cs1)=O)[C@@H](C)O)=O)C)O)C)=O)c1c[nH]cn1)[C@@H]1[C@@H](O[C@@H]2[C@@H]([C@@H]([C@@H](O)[C@@H](O2)CO)OC(N)=O)O)[C@@H]([C@@H](O)[C@@H](O1)CO)O	0.43	1.26		5.77	3.9	FDA label Accessed October 1 2018. https://www.accessdata.fda.gov/drugsatfda_docs/label/2010/050443s036lbl.pdf	Data reported in L/m2. 1.73 m2/70 kg. MRT from VDss and clearance.		1966	1415.55	38	20	627.1	36	cationic	-9	-9
BLP1654	28889-87-4	N12[C@@H](C(S[C@@H]2[C@@H](C1=O)NC(=O)[C@@H](c1ccccc1)NC(=O)NC(=N)N)(C)C)C(=O)O	0.24	1.6	0.8	2.5	2.09	JOHN T. CLARKE, ROBERT D. LIBKE, EDWARD D. RALPH, RUEDI P. LUTHY, and WILLIAM M. M. KIRBY. Human Pharmacokinetics of BL-P1654 Compared with Ampicillin. Antimicr. Agents Chemother., 974, 6, 729-733.	Data average of 2 cohhorts of 4 subjects. 5 and 30' infusion of 1 g of BLP1654. data reported as L/1.73m2 and mL/min/1.73 m2. 1.73m2/70 kg conversion factor used.		1970	434.47	11	6	177.7	6	zwitterionic	0.061	-2.3
BMS-214662	195987-41-8	O=S(=O)(N1Cc2cc(ccc2N(Cc3cnc[nH]3)C[C@H]1Cc4ccccc4)C#N)c5cccs5	0.84	9.6	0.01	1.4	1.6	Ryan DP, Eder JP, Puchlaski T, Seiden MV, Lynch TJ, Fuchs CS, Amrein PC, Sonnichsen D, Supko JG, and Clark JW (2004) Phase I clinical trial of the farnesyltransferase inhibitor BMS-214662 given as a 1 hour intravenous infusion in patients with advanced solid tumors. Clin. Canc. Res. 10: 2222-2230.//ppb: Helen J. Mackay, Ronald Hoekstra, Ferry A. L. M. Eskens, Walker J. Loos, Donna Crawford, Mauri…			1997	489.61	7	1	93.1	7	neutral	3.6	3.5
Bortezomib	179324-69-7	CC(C)C[C@H](NC(=O)[C@H](Cc1ccccc1)NC(=O)c2cnccn2)B(O)O	10	19	0.17	8.8	18	Papandreou CN, Daliani D, Nix D, Yang H, Madden T, Wang X, Pien CS, Millikan RE, Tu SM, Pagliaro L, Kim J, Adams J, Elliott P, Esseltine D, Petrusich A, Dieringer P, Perez C, and Logothetis CJ (2004) Phase I trial of the proteasome inhibitor bortezomib in patients with advanced solid tumors with observations in androgen-independent prostate cancer. J. Clin. Oncol. 22: 2108-2121. Velcade Product L…			1996	384.24	8	4	124.4	9	neutral	0.8	0.8
Bosentan	147536-97-8	COc1ccccc1Oc2c(NS(=O)(=O)c3ccc(cc3)C(C)(C)C)nc(nc2OCCO)c4ncccn4	0.29	2.1	0.037	2.3	4.1	Weber C, Schmitt R, Birnboeck H, Hopfgartner G, Eggers H, Meyer J, Van Marle S, Viischer HW, and Jonkman JHG (1999) Multiple-dose pharmacokinetics, safety, and tolerability of bosentan, an endothelin receptor antagonist, in healthy male volunteers. J. Clin. Pharmacol. 39: 703-714. Weber C, Schmitt R, Birnboeck H, Hopfgartner G, Van Marle SP, Peeters PAM, Jonkman JHG, and Jones CR (1996) Pharmacok…			1992	551.61	11	2	145.6	10	anionic	3.9	0.76
Brexpiprazole	913611-97-9	c1cc(c2ccsc2c1)N3CCN(CC3)CCCCOc4ccc5ccc(=O)[nH]c5c4	1.46	0.34	0.002	70.95	54.37	https://www.accessdata.fda.gov/drugsatfda_docs/nda/2015/205422Orig1Orig2s000ClinPharmR.pdf. Accessed April 10 2017.	data digitized from Figure 1 (left panel, iv). 0.25 mg dose, 1 hr infusion, N=16, healthy subjects. 70 kg average weight assumed. Very large extrapolation from AUC0-t to inf reported due likely to overestimation of t 1/2. Cltot reported as 19.8 mL.h-1.kg-1 (and calculated via AUC0-t) vs. calculated as 20.61 mL.h-1.kg-1.		2006	433.57	5	1	48.6	7	cationic	5	2.6
Brivaracetam	357336-20-0	CCC[C@H]1CN([C@@H](CC)C(=O)N)C(=O)C1	0.56	0.75	0.825	12.47	8.98	Armel Stockis, Jan Hartstra, Muriel Mollet, and Salah Hadi. Bioavailability and bioequivalence comparison of brivaracetam 10, 50, 75, and 100 mg tablets and 100 mg intravenous bolus. Epilepsia, doi: 10.1111/epi.13433// ppb: reported by Sargentini-Maier ML, Espie P, Coquette A, et al. Pharmacokinetics and metabolism of 14C-brivaracetam, a novel SV2A ligand, in healthy subjects. Drug Metab Dispos 2…	N=25, 100 mg dose as iv bolus, 70 kg average weight assumed. Data digitized from plot reported. Reported AUCinf 31.95 ug.h.mL-1, calculated AUCinf 31.77 ug.h.mL-1.		2001	212.29	4	1	63.4	5	neutral	0.82	0.82
Bromazepam	1812-30-2	Brc1ccc2NC(=O)CN=C(c3ccccn3)c2c1	0.85	0.51	0.48	28	21	Raaflaub VJ and Speiser-Courvoisier J (1974) Zur pharmakokinetik von bromazepam beim menschen. Arz. Forsch. 24: 1841-1844. Lucek RW and Coutinho CB (1976) The role of substituents in the hydrophobic binding of the 1,4-benzodiazepines by human plasma proteins. Molec. Pharmacol. 12: 612-619.	Parameters calculated from C vs t data provided in the reference.		1962	316.15	4	1	54.3	1	neutral	2	2
Bromfenac	91714-94-2	Nc1c(CC(=O)O)cccc1C(=O)c2ccc(Br)cc2	0.11	1.3	0.0011	1.5	2.6	Gumbhir-Shah K, Cevallos WH, DeCleene SA, Halstenson CE, and Korth-Bradley JM (1997) Absolute bioavailability of bromfenac in humans. Ann. Pharmacother. 31: 395-399.			1984	334.16	4	2	80.4	4	anionic	3.3	0.33
Bromopride	4093-35-0	CCN(CC)CCNC(=O)c1cc(Br)c(N)cc1OC	3.1	13	0.6	4	2.9	Brodie RR, Chasseaud LF, Darragh A, Lambe RF, Rooney L, and Taylor T (1986) Pharmacokinetics and bioavailability of the anti-emetic agent bromopride. Biopharm. Drug Dispos. 7: 215-222.	VDss was calculated using C vs t data provided in the reference.		1964	344.25	5	2	67.6	7	cationic	2	0.44
Bromotetrandrine	62067-29-2	O(C)c1c2c3c(c(c1OC)Br)CCN([C@H]3Cc1cc(c(cc1)OC)Oc1ccc(C[C@H]3c4cc(O2)c(OC)cc4CCN3C)cc1)C	51	9.6	0.22	88.2	59.4	Zheng L; Qing Y-P; Xu N; Yu Q; Wang Y; Wang F-P; Li Z-Y. Pharmacokinetics and safety of bromotetrandrine (BrTet, W198) after single-​dose intravenous administration in healthy Chinese volunteers. Journal of clinical pharmacy and therapeutics (2010), 35(1), 113-119.//ppb: Xiao SH, Wei GL, Lu R, Liu CX, Wang FP. Pharmacokinetics of bromotetrandrin (W198) in rats and beagle dogs. Yao Xue Xue Bao. 20…	Data digitized from plot reported. N=10, 30 mg/m2 dose only. AUC reported 1311.3 ug.h/L. Calculated AUC 1279.4 ng.h/mL. From ppb reference (abstract): The plasma protein binding ratio of W198 with human serum protein was 78.0%.		1977	701.65	8	0	61.9	4	cationic	8.3	7.2
Brostallicin	203258-60-0	c1c(cn(c1C(=O)NCC/N=C(/N)N)C)NC(=O)c1n(cc(c1)NC(=O)c1cc(cn1C)NC(=O)c1cc(cn1C)NC(=O)C(=C)Br)C	0.36	5.15		1.2	8.3	A Phase I Dose-Escalation and Pharmacokinetic Study of Brostallicin (PNU-166196A), a Novel DNA Minor Groove Binder, in Adult Patients with Advanced Solid TumorsA. Craig Lockhart,1 Martin Howard, Kenneth R. Hande, Bruce J. Roth,Jordan D. Berlin, Franzanne Vreeland, Angela Campbell, Erminia Fontana,Francesca Fiorentini, Camilla Fowst, Victoria A. Paty, Odessa Lankford, and Mace L. Rothenberg Clin. …	Reported AUC(0-inf) = 385.6 ng.h/mL, N= 6, 4.8 mg/m2, 1.73 m2/70 kg conversion factor. 10' infusion.		1998	723.58	17	7	229.6	12	neutral	1.9	1.9
Brotizolam	57801-81-7	Cc1nnc2CN=C(c3ccccc3Cl)c4cc(Br)sc4n12	0.75	2	0.092	6	4.8	Jochemsen R, Wesselman JGJ, Hermans J, Van Boxtel CJ, and Breimer DD (1983) Pharmacokinetics of brotizolam in healthy subjects following intravenous and oral administration. Br. J. Clin. Pharmacol. 16(Suppl. 2): 285-290. Jochemsen R, Joeres RP, Wesselman JG, Richter E, and Breimer DD (1983) Pharmacokinetics of oral brotizolam in patients with liver cirrhosis. Br. J. Clin. Pharmacol. 16(Suppl 2): …	VDss was calculated using data obtained by digitization of the C vs t plot provided in the reference.		1975	393.69	4	0	43.1	1	neutral	2.8	2.7
Budesonide	51333-22-3	CCCC1O[C@@H]2C[C@H]3[C@@H]4CCC5=CC(=O)C=C[C@]5(C)[C@H]4[C@@H](O)C[C@]3(C)[C@@]2(O1)C(=O)CO	3.9	20	0.13	3.2	2.8	Ryrfeldt A, Andersson P, Edsbacker S, Tonnesson M, Davies D, and Pauwels R (1982) Pharmacokinetics and metabolism of budesonide, a selective glucocorticoid. Eur. J. Resp. Dis. 63: 86-95. Entocort EC Product Label.	VDss was calculated using data obtained by digitization of the C vs t plot provided in the reference.		1973	430.53	6	2	93.1	4	neutral	3	3
Buflomedil	55837-25-7	COc1cc(OC)c(C(=O)CCCN2CCCC2)c(OC)c1	1.3	5.6	0.4	3.9	3.3	Gundert-Remy U, Weber E, Lam G, Chiou WL, Mann W, and Aynilian GH (1981) The clinical pharmacokinetics of buflomedil in normal subjects after intravenous and oral administration. Eur. J.Clin. Pharmacol. 20: 459-63. Rey E, D'Athis P, Richard MO, Fillastre JP, and Olive G (1984) Pharmacokinetics of buflomedil after intravenous administration in patients with chronic renal failure. Int. J. Clin. Pha…			1978	307.38	5	0	48	8	cationic	2.5	0.52
Bufuralol	54340-62-4	CCc1cccc2cc(oc12)C(O)CNC(C)(C)C	1.7	8.9	0.19	3.2	2.3	Dayer P, Balant L, Kupfer A, Striberni R, and Leemann T (1985) Effect of oxidative polymorphism (debrisoquine/sparteine type) on hepatic first-pass metabolism of bufuralol. Eur. J. Clin. Pharmacol. 28: 317-320. Foti RS and Fisher MB (2004) Impact of incubation conditions on bufuralol human clearance predictions: Enzyme lability and nonspecific binding. Drug Metab. Dispos. 32: 295-304.	CYP2D6 extensive metabolizers only. VDss calculated from C vs t data obtained by digitization of the plots included in the reference.		1975	261.36	3	2	45.7	4	cationic	3.3	1.7
Bumecaine	30103-44-7	CCCCN1CCCC1C(=O)Nc2c(cc(cc2C)C)C	1.73	19.19		1.51	1.58	Piotrovskii, V. K.; Blagodatskikh, S. V.; Ryabokon, O. S.; Metelitsa, V. I.; Smirnov, V. K.; Gorshkov, V. A.; Mazur, N. A.; Pryanishnikova, N. T. Clinical pharmacokinetics of pyromecaine. I. Single intravenous administration Khimiko-Farmatsevticheskii Zhurnal (1983), 17(12), 1427-32	Pyromecaine. N=10 all male patients, 100 mg iv dose. MRT from reported clearance and VDss.		1970	288.43	3	1	32.3	5	cationic	4	3.3
Bumetanide	28395-03-1	CCCCNc1cc(cc(c1Oc2ccccc2)S(=O)(=O)N)C(=O)O	0.16	2.5	0.031	1.1	1.2	Pentikainen PJ, Pasternack A, Lampainen E, Neuvonen PJ, and Penttila A (1985) Bumetanide kinetics in renal failure. Clin. Pharmacol. Ther. 37: 582-528. Lau HSH, Hyneck ML, Berardi RR, Swartz RD, and Smith DE (1986) Kinetics, dynamics, and bioavailability of bumetanide in healthy subjects and patients with chronic renal failure. Clin. Pharmacol. Ther. 39: 635-645. Cook JA, Smith DE, Cornish LA, Ta…	Data combined from three references.		1970	364.42	7	3	118.7	8	anionic	3.4	0.56
Bunazosin	80755-51-7	CCCC(=O)N1CCCN(CC1)c2nc(N)c3cc(OC)c(OC)cc3n2	0.72	4.8	0.06	2.5	2	Morishita N, Tomono Y, Hasegawa J, and Heuer HJ (1993) Single dose crossover study to evaluate the absolute bioavailability of a sustained-release formulation of bunazosin (E1015) in healthy male volunteers. Drug Invest. 6: 5-9. Yamato C, Takahashi T, Tadano K, Kinoshita K, and Fujita T (1985) The metabolic fate of bunazosin hydrochloride (2). Studies on the transfer to fetus and milk, plasma pro…			1980	373.45	8	1	93.8	5	neutral	2.7	2.6
Bupivacaine	38396-39-3	CCCCN1CCCCC1C(=O)Nc2c(C)cccc2C	0.84	4.3	0.056	3.3	3.1	Burm AGL, Van der Meer AD, Van Kleef JW, Zeijlmans PWM, and Groen K (1994) Pharmacokinetics of the enantiomers of bupivacaine following intravenous administration of the racemate. Br. J. Clin. Pharmacol. 38: 125-129.	Values for enantiomers were averaged.		1957	288.43	3	1	32.3	5	cationic	4	3.4
Buprenorphine	52485-79-7	CO[C@]12CC[C@@]3(C[C@@H]1[C@](C)(O)C(C)(C)C)[C@H]4Cc5ccc(O)c6O[C@@H]2[C@]3(CCN4CC7CC7)c56	4.9	19	0.04	4.9	3.2	Kuhlman JJ, Lalani S, Magluilo, J, Levine B, Darwin WD, Johnson RE, and Cone EJ (1996) Human pharmacokinetics of intravenous, sublingual and buccal buprenorphine. J. Anal. Toxicol. 20: 369-378. Elkader A and Sproule B (2005) Buprenorphine: clinical pharmacokinetics in the treatment of opioid dependence. Clin. pharmacokinet. 44: 661-680.			1968	467.64	5	2	62.2	4	cationic	4.4	3.1
Busulphan	55-98-1	CS(=O)(=O)OCCCCOS(=O)(=O)C	0.55	2.4	1	3.8	3.4	Hassan M, Nilsson C, Hassan Z, Gungor T, Aschan J, Winiarski J, Hentschke P, Ringden O, Eber S, Seger R, and Ljungman P (2002) A phase II trial of liposomal busulphan as an intravenous myeloablative agent prior to stem cell transplantation: 500 mg/m(2) as a optimal total dose for conditioning. Bone Marrow Transplantation 30: 833-841. Ehrsson H and Hassan M (1984) Binding of busulfan to plasma pro…			1950	246.3	6	0	86.7	7	neutral	-0.72	-0.72
Buthionine sulfoximine	5072-26-4	C([S@@](CCCC)(=N)=O)C[C@@H](C(O)=O)N	0.26	2.28		1.9	1.68	Phase I Trial of Buthionine Sulfoximine in Combination With Melphalan in Patients With Cancer. Peter J. O'Dwyer, Thomas C. Hamilton, Frank P. LaCreta, James M. Gallo, Deborah Kilpatrick, Theresa Halbherr, James Brennan, Michael A. Bookman, John Hoffman, Robert C. Young, Robert L. Comis, and Robert F. Ozols. J. Clin. Oncol. 1996,14:249-256.	BRN 2367136, NSC 326231, NSC 381100. Data weight-averaged from table 5 across both R/S isomers. MRT calculated from VDss and clearance. 70 kg assumed, N=23 total, 5-17 g/m2 dose.		1960	222.31	5	3	104.2	7	zwitterionic	-0.19	-2.5
Butorphanol	42408-82-2	Oc1ccc2C[C@H]3N(CC4CCC4)CC[C@@]5(CCCC[C@@]35O)c2c1	12	41	0.17	5.3	4.8	Vachharajani NN, Shyu WC, Garnett WR, Morgenthien EA and Barbhaiya RH (1996) The absolute bioavailability and pharmacokinetics of butorphanol nasal spray in patients with hepatic impairment. Clin. Pharmacol. Ther. 60: 283-294. Gaver RC, Vasiljev M, Wong H, Monkovic I, Swigor JE, Van Harken DR, and Smyth RD (1980) Disposition of parenteral butorphanol in man. Drug Metab. Dispos. 8: 230-235.			1973	327.46	3	2	43.7	2	cationic	3.2	2.1
Butylbiguanide	692-13-7	CCCCNC(=N)NC(=N)N	1.84	6.58	0.9	4.66	4.62	Lintz, W.; Berger, W.; Aenishaenslin, W.; Kutova, V.; Baerlocher, Ch.; Kapp, J. P.; Beckmann, R. Butylbiguanide concentration in plasma, liver, and intestine after intravenous and oral administration to man. Eur. J. Clin. Pharmacol. (1974), 7(6), 433-48.	N=4, diabetic patients, 77 kg average weight reported, 50 mg dose i.v. VDss from V1 and k12, k21. MRT from VDss and clearance. Renal clearance 73%. Total radioactivity but noted that there is no metabolism by the authors so that the equivalence radiioactivity=compound is valid.		1959	157.22	5	5	97.8	6	cationic	-0.61	-4.1
Cabazitaxel	183133-96-2	C1(C2=C([C@H](C[C@]1([C@H]([C@H]1[C@](C(=O)[C@@H]2OC)([C@H](C[C@@H]2[C@]1(CO2)OC(=O)C)OC)C)OC(=O)c1ccccc1)O)OC(=O)[C@@H]([C@H](c1ccccc1)NC(=O)OC(C)(C)C)O)C)(C)C	48	11	0.24	72.7	74.5	Mita, Alain C.; Denis, Louis J.; Rowinsky, Eric K.; DeBono, Johann S.; Goetz, Andrew D.; Ochoa, Leonel; Forouzesh, Bahram; Beeram, Muralidhar; Patnaik, Amita; Molpus, Kathleen; Semiond, Dorothee; Besenval, Michele; Tolcher, Anthony W. Phase I and Pharmacokinetic Study of XRP6258 (RPR 116258A), a Novel Taxane, Administered as a 1-Hour Infusion Every 3 Weeks in Patients with Advanced Solid Tumors. …	XRP6258 or RPR116258A or Jevtana. 23 patients overall. Doses from 10 to 25 mg/m2 as 1 hour infusion. Weighted average and 1.73m2/70kg factor used. Reported (weighted) average of clearance and VDss 26.77 L/h/m2 and 1942.8 L/m2, respectively. MRT=VDss/Cl.		1996	835.93	15	3	202.4	14	neutral	4	4
Caderofloxacin	153808-85-6	n1(cc(c(c2cc(c(c(c12)OC(F)F)N1C[C@@H](NCC1)C)F)=O)C(=O)O)C1CC1	1.1	2.7		7.1	5.9	Pharmacokinetics of caderofloxacin hydrochloride after intravenous infusion in healthy volunteers. WANG Yuan-yuan，ZHANG Jing，ZHANG Deng-shan，ZOU Ying，LIU Guang-yu. Chinese Journal of New Drugs 2011, 20( 23) 2377-2380.	Caderofloxacin, CS-940. Data digitized from plot of mean data after an infusion (1 hr) of 0.4 g of compound to 10 male and female healthy volunteers. Data reported in Table 1 are average of separate PK calculations in Table 2. Reported AUCinf as 45.1 ug.mL.h-1.		1990	411.38	7	2	83.8	5	zwitterionic	2.5	-0.28
Caffeine	58-08-2	CN1C(=O)N(C)c2ncn(C)c2C1=O	0.63	1.4	0.64	7.5	4.9	Blanchard J and Sawers SJA (1983) Comparative pharmacokinetics of caffeine in young and elderly men. J. Pharmacokinet. Biopharm. 11: 109-126.	VDss was calculated from C vs t data obtained by digitization of the plot included in the reference.		1968	194.19	6	0	58.4	0	neutral	0.078	0.078
Calcitonin	21215-62-3	CC[C@H](C)[C@@H](C(=O)NCC(=O)N[C@@H](C(C)C)C(=O)NCC(=O)N[C@@H](C)C(=O)N1CCC[C@H]1C(=O)N)NC(=O)[C@H](C)NC(=O)[C@H]([C@@H](C)O)NC(=O)[C@H](CCC(=O)N)NC(=O)[C@@H]2CCCN2C(=O)[C@H](Cc3ccccc3)NC(=O)[C@H]([C@@H](C)O)NC(=O)[C@H](Cc4cnc[nH]4)NC(=O)[C@H](Cc5ccccc5)NC(=O)[C@H](CCCCN)NC(=O)[C@H](CC(=O)N)NC(=O)[C@H](Cc6ccccc6)NC(=O)[C@H](CC(=O)O)NC(=O)[C@H](CCC(=O)N)NC(=O)[C@H]([C@@H](C)O)NC(=O)[C@H](Cc7ccc(cc…	0.23	10		0.38	0.82	Antonin, K. H.; Saano, V.; Bieck, P.; Hastewell, J.; Fox, R.; Lowe, P.; Mackay, M. Colonic absorption of human calcitonin in man. Clin. Sci. 1992, 83, 627-631	Cibacalcin. Data digitized from plot reported. N=8, 0.5 mg dose in 90 min infusion. 70.5 kg average weight (males) and 63 kg average weight (females) reported. Overall average (N=4/gender) as 67 kg. AUCinf calculated 744.8 ng.min/mL, reported AUC 694.8 ng.min/mL		1968	3419.86	85	45	1359.6	105	cationic	-9	-9
Calcitriol	32222-06-3	C[C@H](CCCC(C)(C)O)[C@H]1CC[C@@H]\2[C@@]1(CCC/C2=C\C=C/3\C[C@H](C[C@@H](C3=C)O)O)C	0.25	0.31		13.29	11	L. Brandi, M. Egfjord, K. Olgaard. Pharmacokinetics of 1,25(OH)2D3 and 1a(OH)D3 in normal and uraemic men. Nephrol. Dial. Transpl. 2002, 17, 829-842.	1,25-(OH)2D3. Ro 21-5535.1-alpha,25-Dihydroxycholecalciferol. Data digitization performed from plot (figure 3) reported. AUC0-72 reported as 3378.6 pg.h.mL-1. AUC0-72 reported as 3522.52 pg.h.mL-1. 4% difference.		1971	416.64	3	3	60.7	5	neutral	6	6
Canagliflozin	842133-18-0	Cc1ccc(cc1Cc2ccc(s2)c3ccc(cc3)F)[C@H]4[C@@H]([C@H]([C@@H]([C@H](O4)CO)O)O)O	1.19	2.74	0.01	7.25	10.3	PDR. https://www.pdr3d.com/detail.php?c=183524#section-12. Accessed August 5 2016.	70 kg average weight assumed. No dose reported. MRT from Clearance and VDss. T1/2 from ORAL dose of 100 mg.		2005	444.52	5	4	90.1	5	neutral	3.3	3.3
Candesartan	139481-59-7	CCOc1nc2cccc(c2n1Cc3ccc(cc3)c4ccccc4c5[nH]nnn5)C(=O)O	0.13	0.37	0.002	5.9	9.7	Reference through PP. 1997-Apr-30 PDF(1259k) Clinical Pharmacology and Biopharmaceutics Review 020838/S-000 Part 01 NDA 20838.	4 mg 14C of candesartan iv. MRT from VDss and Cl		1991	440.45	9	2	118.8	7	anionic	4.9	-0.31
Candoxatrilat	123122-54-3	[H]N(C1CCC(CC1)C(=O)O[H])C(C1(CCCC1)CC[C@@H](COCOC)C(=O)O[H])=O	0.25	2.3	0.872344	1.81	16	McDowell, Garry; Nicholls, D. Paul. The therapeutic potential of candoxatril, a neutral endopeptidase inhibitor, in humans. Cardiovascular Drug Reviews, 2000, 18, 259-270.	Data from 150 mg iv dose. MRT calculated from CL and VDss. fu from Lombardo et al J. Clin. Pharmacol. 2013, 53(2), 167-177 and 178-191		1989	399.48	8	3	122.2	13	anionic	1.6	-3.6
Cangrelor	163706-06-7	CSCCNc1nc(SCCC(F)(F)F)nc2n([C@@H]3O[C@@H]([C@H]([C@H]3O)O)CO[P@@](O[P@@](O)(=O)C(Cl)(P(O)(O)=O)Cl)(O)=O)cnc12	0.035	9.06	0.02	0.07	0.14	Akers Wendell S; Oh Jennifer J; Oestreich Julie H; Ferraris Suellen; Wethington Mary; Steinhubl Steven R. Pharmacokinetics and Pharmacodynamics of a Bolus and Infusion of Cangrelor: A Direct, Parenteral P2Y12 Receptor Antagonist. Journal of clinical pharmacology (2010), 50(1), 27-35.//ppb: https://www.accessdata.fda.gov/drugsatfda_docs/nda/2015/204958orig1s000clinpharmr.pdf. Accessed July 12 2017.	Digitized and then averaged from two groups. N=10 and N=9. 81 kg average with total dose 10 677 ug, and 79 kg average with total dose 20704 ug, respectively.		1994	776.36	17	7	255.9	15	anionic	-1.4	-8.6
Cannabidiol	13956-29-1	CCCCCc1cc(O)c([C@@H]2C=C(C)CC[C@H]2C(=C)C)c(O)c1	6.69	13.55		8.23	23.82	Ohlsson, Agneta; Lindgren, Jan Erik; Andersson, Susanne; Agurell, Stig; Gillespie, Hampton; Hollister, Leo E. Biomed. Single-dose kinetics of deuterium-labeled cannabidiol in man after smoking and intravenous administration. Envir. Mass Spectr. (1986), 13(2), 77-83.	DEUTERATED COMPOUND. Calculations performed from tabular data reported. N=5, with some time points with N=4 or 3. Average weight 78.6 kg. AUC0-72 = 16670 ng.h.mL-1. Calculated AUC 18240 ng.h.mL-1. 9% difference.		1940	314.46	2	2	40.5	6	neutral	7.4	7.4
Cannabinol	521-35-7	c12c3c(OC(c1ccc(c2)C)(C)C)cc(CCCCC)cc3O	16.98	17.85		15.86	25.51	Eva Johansson, Agneta Ohlsson, Jan-Erik Lindgren, Stig Agurell, Hampton Gillespie, Leo E. Hollister. Single-dose Kinetics of Deuterium-labelled Cannabinol in Man After Intravenous Administration and Smoking. BIOMEDICAL AND ENVIRONMENTAL MASS SPECTROMETRY, 1987, 14, 495-499	DEUTERATED COMPOUND. Calculation performed from data reported in Table. AUC inf reported within 3% of calculated. N=6, 20 mg dose, 72.2 kg average weight.		1896	310.43	2	1	29.5	4	neutral	6.7	6.7
Captopril	62571-86-2	C[C@H](CS)C(=O)N1CCC[C@H]1C(=O)O	0.75	12	0.73	1	2	Duchin KL, Singhvi SM, Willard DA, Migdalof BH, McKinstry DM (1982) Captopril kinetics. Clin. Pharmacol. Ther. 31: 452-458. Creasy WA, Morrison RA, Singhvi SM, and Willard DA (1988) Pharmacokinetics of intravenous captopril in healthy men. Eur. J. Clin. Pharmacol. 35: 367-370.	Combined data from Creasy and Duchin papers. Note that protein binding also has S-S bond component.		1977	217.29	4	1	57.6	3	anionic	0.97	-2.2
Carbazeran	70724-25-3	c1(c(OC)cc2c(c1)c(nnc2)N1CCC(CC1)OC(NCC)=O)OC	0.67	37.6	0.08	0.25	0.25	Kaye B, Offerman JL, Reid JL, Elliott HL, Hillis WS. A species difference in the presystemic metabolism of carbazeran in dog and man. Xenobiot. 1984, 14, 935-945,// ppb: Zientek M, Jiang Y, Youdim, K, and Obach RS (2010) In vitro-in vivo correlation for intrinsic clearance for drugs metabolized by human aldehyde oxidase. Drug Metab. Dispos. 38: 1322-1327.	VDss calculated from mean C vs t data in the paper		1978	360.41	8	1	85.8	6	neutral	2.3	2.3
Carbenicillin	4697-36-3	CC1(C)S[C@@H]2[C@H](NC(=O)C(C(=O)O)c3ccccc3)C(=O)N2[C@H]1C(=O)O	0.17	1.9	0.52	1.5	1.1	Libke RD, Clarke JT, Ralph ED, Luthy RP, and Kirby WMM (1975) Ticarcillin vs carbenicillin: clinical pharmacokinetics. Clin. Pharmacol. Ther. 17: 441-446. Bergan T (1984) Pharmacokinetics of beta-lactam antibiotics. Scand. J. Infect. Dis. 42(Suppl): 83-98.			1964	378.4	8	3	124	5	anionic	1.2	-5.4
Carboplatin	41575-94-4	N[Pt+2]1(N)[O-]C(=O)C2(CCC2)C(=O)[O-]1	0.26	1.5	1	3	2	Elferink F, van der Vijgh WJ, Klein I, Vermorken JB, Gall HE, and Pinedo HM (1987) Pharmacokinetics of carboplatin after i.v. administration. Cancer Treatment Rep. 71: 1231-1237. Gaver RC, George AM, and Deeb G (1987) In vitro stability, plasma protein binding and blood cell partitioning of 14C-carboplatin. Cancer Chemother. Pharmacol. 20: 271-276.	Used 1.6 m2 = 60 kg since the study was done in all females.		1982	369.24	6	2	108.8	0	n/a	n/a	n/a
Carebastine	90729-42-3	C1C(CCN(C1)CCCC(c1ccc(C(C(=O)O)(C)C)cc1)=O)OC(c1ccccc1)c1ccccc1	0.41	0.4	0.05	16.7	9.8	J.M. JANSAT, C.F. LASTRA, E.L. MARINO Comparative study of different weighting methods in non-linear regression analysis: implications in the parametrization of carebastine after intravenous administration in healthy volunteers. Int. J. Clin. Pharmacol. Ther., Vol. 1998, 36, 340-344.//ppb: A del Cuvillo, J Mullol, J Bartra, I Dávila, I Jáuregui, J Montoro, J Sastre, AL Valero. Comparative pharmac…	Data taken from Table 1. 77 kg median weight, 10 mg total dose. N=8. VDss from MRT and clearance.		1985	499.64	5	1	66.8	11	zwitterionic	5.9	3
Carfilzomib	868540-17-4	C1O[C@]1(C([C@@H](NC([C@@H](NC([C@@H](NC([C@@H](NC(=O)CN1CCOCC1)CCc1ccccc1)=O)CC(C)C)=O)Cc1ccccc1)=O)CC(C)C)=O)C	0.13	39.5	0.02	0.05	1.1	Clinical Pharmacokinetics, Metabolism, and Drug-Drug Interaction of Carfilzomib. Zhengping Wang, Jinfu Yang, Christopher Kirk, Ying Fang, Melissa Alsina, Ashraf Badros, Kyriakos Papadopoulos, Alvin Wong, Tina Woo, Darrin Bomba, Jin Li, and Jeffrey R. Infante. Drug Metab Dispos 2013, 41:230–237.	Data digitized from Wang et al. DMD 2013, 41, 230-237. N=3, cycle 1 day 1. 20 mg/m2 with 1.73 m2/kg was used as the conversion factor. Digitization somewhat difficult. AUC reported as 238 hr*ng/mL. Clearance reported as 146 L/h (= 34.8 mL/min/kg) vs. calculated as 39.5 mL/min/kg. Values are slightly above 10% variation between the two sets.		2005	719.91	12	4	158.5	20	neutral	5	4.9
Carmustine (BCNU)	154-93-8	ClCCNC(=O)N(CCCl)N=O	1.2	78	0.23	0.26	0.37	Henner WD, Peters WP, Eder JP, Antman K, Schnipper L, and Frei E (1986) Pharmacokinetics and immediate effects of high-dose carmustine in man. Canc. Treatm. Rep. 70: 877-880.	Used VD as VDss because PK was first order.		1946	214.05	5	1	61.8	5	neutral	1.4	1.4
Carnitine_L	406-76-8	C([N+](C)(C)C)[C@@H](CC(=O)[O-])O	0.4	1.6	1	4.2	5	Sahajwalla CG, Helton ED, Purich ED, Hoppel CL, Cabana BE. Comparison of L-Carnitine Pharmacokinetics With and Without Baseline Correction Following Administration of Single 20-mglkg Intravenous Dose. J Pharm Sci. 1995 May;84(5):634-9. ppb: the PDR states: Levocarnitine was not bound to plasma protein or albumin when tested at any concentration or with any species including the human. Accessed Ja…	All data from table 3, calculated as average dose 1,485 mg (MW161, 9,223,602 nmol), 74 kg average weight.N=15. VDss taken as 29 L (free corrected, not conjugated L-carnitine). MRT from VDss and clearance. AUC taken as 1318 nmol.hr/mL.	70-85% excreted unchanged. Same paper as for ref. for data.	1902	161.2	4	1	60.4	4	anionic	-4.6	-4
Carocainide	66203-00-7	C1CCN(C1)CCOc1c(OC)c2occc2c(c1NC(NC)=O)OC	0.8	3.2		4.2	5	Rovei V, Strolin Benedetti M, Daniel C, Moulin A, Donath A. Pharmacokinetics and metabolism of the antiarrhythmic carocainide in man. Xenobiot. 1985, 15, 953-964.	Data digitized from plot reported. Within range reported but not in close agreement with mean AUC. 100 mg, N=6, median weight 65 kg. ppb saturable as reported in the work cited.		1978	363.41	8	2	85.5	7	cationic	1.4	0.3
Carprofen	53716-49-7	CC(c1ccc2c3cc(ccc3[nH]c2c1)Cl)C(=O)O	0.22	0.51	0.001	7.2	9.9	Crevoisier C. Pharmacokinetc properties of carprofen in humans. Eur J Rheumatol Inflamm. 1982, 5: 492-502	RO 20-5720. Rimadyl. MRT from VDss and clearance.		1974	273.71	3	2	53.1	2	anionic	4	0.95
Carteolol	51781-06-7	c12c(cccc1OC[C@@H](CNC(C)(C)C)O)NC(=O)CC2		10.1			4.7	T. Ishizaki, A. Ohnishi, T. Sasaki, K. Kushida, Y. Horai , K. Chiba , and T. Suganuma. Pharmacokinetics and Absolute Bioavailability of Carteolol,a New beta-Adrenergic Receptor Blocking Agent. Eur J Clin Pharmacol (1983) 25:95-101	Data digitized from plot reported. 0.21 mg/kg free base dose, N=8, 62 kg average weight. Free base taken as plasma concentration corrected by authors to reflect that. N=1 only. Clearance value from paper kept.	65% excreted in urine unchanged	1974	292.37	5	3	70.6	5	cationic	1.3	-0.6
Carumonam	87638-04-8	NC(=O)OC[C@@H]1[C@H](NC(=O)\C(=N/OCC(=O)O)\c2csc(N)n2)C(=O)N1S(=O)(=O)O	0.18	1.5	0.72	2	1.6	Weidekamm E, Kronenberger D, Portmann R, Stoeckel K, Egger HJ, and Dubach UC (1985) Single dose pharmacokinetics and absolute bioavailability of the new monocyclic .beta.-lactam carumonam (Ro 17-2301, AMA-1080). Recent Adv. Chemother., Proc. 14th Int. Congr. Chemother. (Antimicrobial Sect. 2), 1335-1336. Kita Y, Fugono T, and Imada A (1987) Pharmacokinetics of carumonam in experimental animals. C…	Ro 172301, AMA-1080.		1983	466.4	16	5	253.9	10	anionic	-2.8	-8
Carvedilol	72956-09-3	COc1ccccc1OCCNCC(O)COc2cccc3[nH]c4ccccc4c23	1.3	7.8	0.02	2.8	2.4	Neugebauer G, Akpan W, Mollendorff E, Neubert P, and Reiff K (1987) Pharmacokinetics and disposition of carvedilol in humans. J. Cardiovasc. Pharmacol. 10(Suppl 11): S85-S88. Coreg Product Label.			1979	406.47	6	3	75.7	10	cationic	3.6	2.9
Carzelesin	119813-10-4	c1(N(CC)CC)cc2oc(C(Nc3ccc4c(c3)cc([nH]4)C(N3C[C@H](c4c5c([nH]cc5C)c(OC(=O)Nc5ccccc5)cc34)CCl)=O)=O)cc2cc1	0.09	2.9		0.51	0.48	Data as average of two different single patient profiles (N=2): (1) Van Tellingen, Olaf; Nooijen, Willem J.; Schaaf, Larry J.; Van Der Valk, Martin; Van Asperen, Judith; Henrar, Roland E. C.; Beijnen, Jos H. Comparative pharmacology of the novel cyclopropylpyrroloindole-​prodrug carzelesin in mice, rats, and humans. Cancer Research (1998), 58(11), 2410-2416. (2) van Tellingen O, Punt CJ, Awada A,…	(1) data digitized from Fig. 4. Dose 300 ug/m2 (0.0075 mg/kg), infusion T=10 min, N=1*. (2) data digitized from Fig. 5 (dose 210 ug/m2 (0.00525 mg/kg), infusion T=10 min, N=1**. * reported data: see Table 4 (data seems to be for 3 patients (N=3) presented in Table 1 in van Tellingen O. et al, Cancer Chemother Pharmacol, 1998, 41, 377-384). The actual digitized values (AUC, CL, ...) seem to agree …		1988	729.22	11	4	136	10	neutral	7.7	7.7
Casopitant	414910-27-3	c1(cc(cc(c1)[C@H](N(C(=O)N1CC[C@@H](C[C@@H]1c1c(cc(cc1)F)C)N1CCN(CC1)C(=O)C)C)C)C(F)(F)F)C(F)(F)F	2.77	3.07	1	15.04	15.6	Mario Pellegatti, Ellenia Bordini, Patrizia Fizzotti, Andy Roberts, and Brendan M. Johnson. Disposition and Metabolism of Radiolabeled Casopitant in Humans. Drug Metab. Disp. 2009, 37, 1635-1645.// ppb: Bauman, John W.; Antal, Joyce M.; Adams, Laurel M.; Johnson, Brendan M.; Murray, Sharon C.; Peng, Bin; Kirby, Lyndon C.; Lebowitz, Peter F.; Marbury, Thomas C.; Swan, Suzanne; Gutierrez, Maria. Ef…	70 kg average weight assumed. N=6. 15 minutes infusion of a 90 mg dose. MRT from VDss and clearance.		2002	616.61	6	0	47.1	4	neutral	5.4	5.4
Caspofungin	162808-62-0	CCC(C)CC(C)CCCCCCCCC(=O)NC1CC(O)C(NCCN)NC(=O)C2C(O)CCN2C(=O)C(NC(=O)C(NC(=O)C3CC(O)CN3C(=O)C(NC1=O)C(C)O)C(O)C(O)c4ccc(O)cc4)C(O)CCN	0.13	0.14	0.035	15	27	Stone JA, Xu X, Winchell GA, Deutsch PJ, Pearson PG, Migoya EM, Mistry GC, Xi L, Miller A, Sandhu P, Singh R, deLuna F, Dilzer SC, Lasseter KC (2004) Disposition of caspofungin: role of distribution in determining pharmacokinetics in plasma. Antimic. Agents Chemother. 48: 815-823.	VDss was calculated from rate micro-contants provided in the reference.		1994	1093.31	25	16	412	23	cationic	-1.4	-6.3
CB 10-277	7203-91-0	CN(C)N=Nc1ccc(cc1)C(=O)O	0.25	1.3		3	2.5	Foster BJ, Newell DR, Carmichael J, Harris AL, Gumbrell LA, Jones M, Goodard PM, and Calvert AH (1993) Preclinical, phase I and pharmacokinetic studies with the dimethyl phenyltriazene CB10-277. Br. J. Canc. 67: 362-368.	Parameters were calculated using C vs t data obtained by digitzation of the plot provided in the reference.		1965	193.2	5	1	65.3	3	anionic	2.5	-0.32
CDK-712	626252-75-3	C([C@H]1c2c(cc(c(c2)O)O)CCN1)c1c2c(ccc1)cccc2	1.09	156		0.12	1.58	Sang-In Park,JaeWoo Kim, Kyung-Sang Yu, In-Jin Jang, SeungHwan Lee. Changes in Cardiac Function After a Single Intravenous Administration of CKD-712 in Healthy Male Volunteers. Clin Drug Investig 2017 37, 393–403.	Data digitized from plot reported in SI. 160 ug/kg dose, N=6, 1 h infusion. Generally linear except a deviation at 320 ug/kg dose. Starting dose 20 ug/kg. AUC0-inf reported as 16.40 ug.h.L-1. AUC0-inf calculated as 17.09 ug.h.L-1. 4% difference.		2003	305.37	3	3	52.5	2	cationic	3.7	2.6
Cefadroxil	50370-12-2	CC1=C(N2[C@H](SC1)[C@H](NC(=O)[C@H](N)c3ccc(O)cc3)C2=O)C(=O)O	0.23	2.5	0.39	1.5	1.1	Marino EL, Dominguez-Gil A, and Muriel C (1982) Influence of dosage form and administration route on the pharmacokinetic parameters of cefadroxil. Int. J. Clin. Pharmacol. Ther. Toxicol. 20: 73-77. Aratani H, Kono S, Tateishi H, Negita S, and Yamanaka Y (1980) Pharmacological studies on cefadroxil. II. Pharmacokinetics. Chemotherapy 28(Suppl. 2): 75-82.			1973	363.39	8	4	133	4	zwitterionic	-0.7	-2.1
Cefamandole	34444-01-4	Cn1nnnc1SCC2=C(N3[C@H](SC2)[C@H](NC(=O)[C@H](O)c4ccccc4)C3=O)C(=O)O	0.16	3.6	0.25	0.75	0.75	Brogard JM, Kopferschmitt J, Spach MO, Grudet O, and Lavillaureix J (1979) Cefamandole pharmacokinetics and dosage adjustments in relation to renal function. J. Clin. Pharmacol. 19: 366-377. Leroy A, Fillastre JP, Oksenhendler G, and Humbert G (1977) Pharmacokinetics of cefamandole in normal subjects and in uraemic patients. Drugs Exptl. Clin. Res. 3: 51-59. Bergan T (1984) Pharmacokinetics of be…	VDss and CL calculated from two-compartment terms listed in Brogard, et al. and from a digitized plot in Leroy, et al..		1973	462.5	11	3	150.5	7	anionic	-0.37	-3.4
Cefatrizine	51627-14-6	N[C@@H](C(=O)N[C@H]1[C@H]2SCC(=C(N2C1=O)C(=O)O)CSc3c[nH]nn3)c4ccc(O)cc4	0.22	3.3	0.4	1.1	1.2	Pfeffer M, Gaver RC, and Ximenez J (1983) Human intravenous pharmacokinetics and absolute oral bioavailability of cefatrizine. Antimicr. Agents Chemother. 24: 915-920. Bergan T (1984) Pharmacokinetics of beta-lactam antibiotics. Scand. J. Infect. Dis. 42(Suppl): 83-98.	Analysis done by bioassay.		1974	462.5	11	5	174.5	7	anionic	-0.69	-4.7
Cefazedone	56187-47-4	c1(nnc(s1)C)SCC=1CS[C@H]2N(C1C(O)=O)C([C@H]2NC(Cn1cc(c(c(c1)Cl)=O)Cl)=O)=O	0.13	0.95		2.3	1.91	Pharmacokinetic study of cefazedone sodium given by intravenous drip infusion in healthy volunteers. Ren, Ping; Zheng, Heng; Liu, Xinxia; Yuan, Shiying; Wang, Jing; Qian, Zhenyu; Wu, Dan; Gu, Shifen; Chen, Hui Zhongguo Yaoxue Zazhi (Beijing, China) (2012), 47(4), 291-295 (Chin, Pharm. J.)	Refosporene. 0.5, 1 and 2 g infusion. N=10/dose. Healthy volunteers. Reported 20.8 kg/m2 weight index. Seemingly a very low value and 70 kg weight assumed. VDss from clearance and MRT reported.		1975	548.44	10	2	134.5	7	anionic	0.66	-2.3
Cefazolin	25953-19-9	Cc1nnc(SCC2=C(N3[C@H](SC2)[C@H](NC(=O)Cn4cnnn4)C3=O)C(=O)O)s1	0.12	0.89	0.18	2.2	1.7	Chanson P, Joly V, Contrepois A, Garaud JJ, Bauchet J, Mohler J, Nguyen PC, and Carbon C (1987) Alteration of gentamicin and cefazolin kinetics with control of the hypothyroid state in humans. Antimic. Agents Chemother. 31: 645-637. Decroix MO, Zini R, Chaumeil JC, and Tillement JP (1988) Cefazolin serum protein binding and its inhibition by bilirubin, fatty acids and other drugs. Biochem. Pharma…	VDss assumed to be equal to reported VD in Chanson, et al., because 1st order kinetic model.		1969	454.51	12	2	156.1	7	anionic	-1.2	-4.2
Cefbuperazone	76610-84-9	CCN1CCN(C(=O)N[C@H]([C@H](C)O)C(=O)N[C@@]2(OC)[C@H]3SCC(=C(N3C2=O)C(=O)O)CSc4nnnn4C)C(=O)C1=O	0.19	1.1		2.9	1.9	Liu, Dongbo; Geng, Taohua; Wang, Yiya; Ding, Li. Pharmacokinetic profile of cefbuperazone in healthy Chinese volunteers after single and multiple drip intravenous infusion by HPLC-​MS​/MS. Journal of Pharmaceutical and Biomedical Analysis, 2016, 129, 28-33. N=36 across three doses, VDss from MRT and clearance. Highly linear PK. 70 kg weight assumed.	60% recovered unchanged after 12 hours in urine.		1980	627.65	18	4	229.5	10	anionic	-2.4	-5.4
Cefcanel	41952-52-7	Cc1nnc(SCC2=C(N3[C@H](SC2)[C@H](NC(=O)[C@H](O)c4ccccc4)C3=O)C(=O)O)s1	0.13	2.6		0.83	1	Edwall B, Arvidsson A, Lake-Bakaar D, Lanbeck-Vallen K, and Yisak W (1993) Disposition of oral [14C]cefcanel daloxate hydrochloride in healthy male subjects. Drug Metab. Dispos. 21: 171-177.			1973	478.57	9	3	132.7	7	anionic	0.83	-2.2
Cefclidin	105239-91-6	[H]N([H])C(C12CC[N+](CC1)(CC2)CC1CSC2[C@@H](C(N2C=1C(=O)O[H])=O)N([H])C(C(c1nc(N([H])[H])sn1)=NOC)=O)=O	0.27	1.7		2.6	2.2	Akiyama K. et al. Pharmacokinetics on cefclidin in patients with liver insufficiency. Chemother. (Tokyo) 1997, 40, 678-682.	VDss calculated from reported V1 and k12,k21 constants in patients with liver insufficiency. However, plots and statements regarding healthy volunteers confirmed the essentially equal profiles in healthy subjects. N=16, 57.5 average weight.		1986	551.62	14	4	203.2	10	anionic	-5.6	-4.6
Cefepime	88040-23-7	CO\N=C(/C(=O)N[C@H]1[C@H]2SCC(=C(N2C1=O)C(=O)[O-])C[N+]3(C)CCCC3)\c4csc(N)n4	0.28	2.2	0.78	2.1	1.9	Kalman D, Barriere SL, Johnson BL (1992) Pharmacokinetic disposition and bactericidal activities of cefepime, ceftazidime, and cefoperazone in serum and blister fluid. Antimicrob. Agents Chemother. 36: 453-457. Barbhaiya RH, Forgue ST, Gleason CR, Knupp CA, Pittman KA, Weidler DJ, Movahhed H, Tenney J, and Martin RR (1992) Pharmacokinetics of cefepime after single and multiple intravenous adminis…			1983	480.56	11	2	150	7	anionic	-3.6	-2.7
Cefetamet	65052-63-3	CO\N=C(/C(=O)N[C@H]1[C@H]2SCC(=C(N2C1=O)C(=O)O)C)\c3csc(N)n3	0.28	1.9	0.78	2.5	2.1	Koup JR, Dubach UC, Brandt R, Wyss R, and Stoeckel K (1988) Pharmacokinetics of cefetamet (Ro 15-8074) and cefetamet pivoxil (Ro 15-8075) after intravenous and oral doses in humans. Antimic. Agents Chemother. 32: 573-579.	Ro 15-8074.		1977	397.43	10	3	147.2	5	anionic	0.36	-2.6
Cefixime	79350-37-1	Nc1nc(cs1)\C(=N\OCC(=O)O)\C(=O)N[C@H]2[C@H]3SCC(=C(N3C2=O)C(=O)O)C=C	0.24	1	0.31	3.9	3.2	Faulkner RD, Fernandez P, Lawrence G, Sia LL, Falkowski AJ, Weiss AI, Yacobi A, and Silber BM (1988) Absolute bioavailability of cefixime in man. J. Clin. Pharmacol. 28: 700-706.			1981	453.45	12	4	184.5	8	anionic	-0.38	-6.7
Cefmenoxime	65085-01-0	N12[C@@H]([C@@H](NC(\C(c3csc(n3)N)=N/OC)=O)C2=O)SCC(=C1C(O)=O)CSc1n(nnn1)C	0.2	3.65	0.31	0.77	0.89	Granneman, G. Rrichard; Sennello, Lawrence T.; Steinberg, Frank J.; Sonders, Robert C. Intramuscular and intravenous pharmacokinetics of cefmenoxime, a new broad-spectrum cephalosporin, in healthy subjects.Antimicrobial Agents and Chemotherapy (1982), 21(1), 141-5. ppb: MASAHIRO KONDO, YUMIKO NOJI and KANJI TSUCHIYA. Binding of cefmenoxime (SCE-1365) to human serum proteins. Chemother. (Tokyo) 19…	Average of 30 subjects in 6 cohorts, 3 intravenous infusion and 3 intravenous bolus injections. 500, 1000, 2000 mg doses in each dosing regimen.		1977	511.56	14	3	190.8	8	anionic	-0.15	-3.2
Cefmetazole	56796-20-4	CO[C@]1(NC(=O)CSCC#N)[C@H]2SCC(=C(N2C1=O)C(=O)O)CSc3nnnn3C	0.13	1.5	0.15	1.5	1.5	Ko H, Cathcart SK, Griffith DL, Peters GR, and Adams WJ (1989) Pharmacokinetics of intravenously administered cefmetazole and cefoxitin and effects of probenecid on cefmetazole elimination. Antimicr. Agents Chemother. 33: 356-361. Tan JS, Salstrom SJ, Signs SA, Hoffman HE, and File TM (1989) Pharmacokinetics of intravenous cefmetazole with emphasis on comparison between predicted theoretical leve…			1975	471.53	12	2	163.3	10	anionic	-1.4	-4.3
Cefodizime	69739-16-8	CO\N=C(/C(=O)N[C@H]1[C@H]2SCC(=C(N2C1=O)C(=O)O)CSc3nc(C)c(CC(=O)O)s3)\c4csc(N)n4	0.054	0.61	0.18	1.5	4.2	Bryskier A, Procyk T, Tremblay D, Lenfant B, and Fourtillan JB (1990) The pharmacokinetics of cefodizime following intravenous and intramuscular administration of a single dose of 1.0 g. J. Antimic. Chemother. 26(Suppl C): 59-63. Scaglione F, Demartini G, Arcidiacono MM, Dugnani S, and Fraschini F (1997) Serum protein binding and extravascular diffusion of cefodizime and ceftriaxone. An in vivo s…	VDss calculated from C vs t data provided in the reference.		1978	584.67	13	4	197.4	10	anionic	1.3	-4.9
Cefonicid	61270-58-4	N12[C@@H]([C@@H](NC([C@@H](c3ccccc3)O)=O)C2=O)SCC(=C1C(O)=O)CSc1n(nnn1)CS(O)(=O)=O	0.14	0.38	0.02	5.8	5.1	Cross-over study of the pharmacokinetics of cefonicid administered intravenously or intramuscularly to healthy adult humans. J.B. FOURTILLAN , A. LEROY, M.A. LEFEBVRE , G. HUMBERT, J.P. FILLASTRE, G. REUMONT and N. RAMIS. EUROPEAN JOURNAL OF DRUG METABOLISM AND PHARMACOKINETICS, 1985, 10, 225-230. //ppb:Dudley, Michael N.; Shyu, Wen Chyi; Nightingale, Charles H.; Quintiliani, Richard. Effect of s…	Reported data in Table II: AUC = 621 ug*h/mL t1/2 = 5.24 h CLt = 25.8 ml/min/l.73m2. Calculated AUC = 633.2 µg-h/mL. Average weight 68 kg.		1976	542.57	14	4	204.9	9	anionic	-1.5	-6.7
Cefoperazone	62893-19-0	CCN1CCN(C(=O)N[C@@H](C(=O)N[C@H]2[C@H]3SCC(=C(N3C2=O)C(=O)O)CSc4nnnn4C)c5ccc(O)cc5)C(=O)C1=O	0.17	1.3	0.07	2.2	1.8	Kalman D, Barriere SL, Johnson BL (1992) Pharmacokinetic disposition and bactericidal activities of cefepime, ceftazidime, and cefoperazone in serum and blister fluid. Antimicrob. Agents Chemother. 36: 453-457.			1976	645.67	17	4	220.3	9	anionic	-1.2	-4.3
Ceforanide	60925-61-3	NCc1ccccc1CC(=O)N[C@H]2[C@H]3SCC(=C(N3C2=O)C(=O)O)CSc4nnnn4CC(=O)O	0.17	0.66	0.19	4.3	3	Pfeffer M, Gaver RC, and Van Harken DR (1980) Human pharmacokinetics of a new broad-spectrum parenteral cephalosporin antibiotic, ceforanide. J. Pharm. Sci. 69: 398-403.			1976	519.55	13	4	193.6	10	anionic	-1.3	-4.7
Cefoselis	122841-10-5	CO\N=C(\C(=O)N[C@H]1[C@H]2SCC(=C(N2C1=O)C([O-])=O)C[n+]1ccc(N)n1CCO)c1csc(n1)N	0.3	1.77		2.78	2.9	Qiu et al. Cefoselis, Chin J Clin Pharmacol. 2009, 25, 207-210.	FK-037. N=5 each dosing regimen (1g cefoselis solfate in winnonlin analysis) 60 kg average weight. 1 hr infusion. (A Vss = 0.21 L/kg after 0.5 hr infusion 1g dose is reported by Wise et al. Antimicr Ag Chemother 1994, 38, 2369-2372. Compound named FK-037)	solfate	1989	522.56	14	4	205.1	9	anionic	-1.9	-4.2
Cefotaxime	63527-52-6	CO\N=C(/C(=O)N[C@H]1[C@H]2SCC(=C(N2C1=O)C(=O)O)COC(=O)C)\c3csc(N)n3	0.19	2.7	0.6	1.2	1.2	Wise R, Baker S, and Livingston R (1980) Comparison of cefotaxime and moxalactam pharmacokinetics and tissue levels. Antimic. Agents Chemother. 18: 369-371. Esmieu F, Guilbert J, Rosenkilde HC, Ho I, LeGo A (1980) Pharmacokinetics of cefotaxime in normal human volunteers. J. Antimic. Chemother. 6(suppl A): 83-92.	VDss calculated from C vs t data provided in the reference. fu reported as 0.3 by Hamada T, Ueta E, Kodama H, Osaki T. The excretion of cephem antibiotics into saliva is inversely associated with their plasma protein-binding activities. J Oral Pathol Med. 2002, 31, 109-116.		1957	455.47	12	3	173.5	8	anionic	-0.053	-3.1
Cefotetan	69712-56-7	CO[C@]1(NC(=O)C2SC(=C(C(=O)N)C(=O)O)S2)[C@H]3SCC(=C(N3C1=O)C(=O)O)CSc4nnnn4C	0.13	0.42	0.15	5.2	4.5	Zimmerman J, Cohen A, and Thyrum P (1989) Absolute bioavailability and noncompartmental analysis of intravenous and intramuscular Cefotan (cefotetan) in normal volunteers. J. Clin. Pharmacol. 29: 151-157. Carver PL, Nightingale CH, and Quintiliani R (1989) Pharmacokinetics and pharmacodynamics of total and unbound cefoxitin and cefotetan in healthy volunteers. J. Antimic. Chemother. 23: 99-106.			1977	575.62	15	4	219.9	9	anionic	-1.8	-7.1
Cefotiam	61622-34-2	CN(C)CCn1nnnc1SCC2=C(N3[C@H](SC2)[C@H](NC(=O)Cc4csc(N)n4)C3=O)C(=O)O	0.26	5.8	0.5	0.76	0.84	ANNE-MARIE BRISSON, ANDRE BRYSKIER, LAURETTE MILLERIOUX, AND JEAN-BERNARD FOURTILLAN. Pharmacokinetics of Cefotiam Administered Intravenously and Intramuscularly to Healthy Adults. Antimicrob. Agents Chemother. 1984, 26, 513-518 //ppb: V. Querol-Ferrer, R. Zini, J.-P. Tillement. The blood binding of cefotiam and cyclohexanol, metabolites of the prodrug cefotiam hexetil, in-vitro. J. Pharm. Pharma…	CGP 14221E. N=8, 5F/3M, 1000 mg iv dose, 59 kg average weight reported. Data reported in tabular fom and PK calculated via PKSolver. Reported AUC inf 47.8 ug.h.mL-1; calculated 48.7 47.8 ug.h.mL-1. Approximately 50% excreted renally.		1976	525.63	13	3	172.5	10	zwitterionic	-1.2	-4.3
Cefoxitin	35607-66-0	CO[C@]1(NC(=O)Cc2cccs2)[C@H]3SCC(=C(N3C1=O)C(=O)O)COC(=O)N	0.17	3.6	0.73	0.79	0.81	Ko H, Cathcart SK, Griffith DL, Peters GR, and Adams WJ (1989) Pharmacokinetics of intravenously administered cefmetazole and cefoxitin and effects of probenecid on cefmetazole elimination. Antimicr. Agents Chemother. 33: 356-361.			1971	427.45	10	3	148.3	8	anionic	-0.81	-3.8
Cefozopran	113359-04-9	[H]N([H])c1nc(C(C(N([H])[C@H]2C(N3C(=C(CN4C=CN5C4=CC=C[N-]5)CS[C@H]23)C(=O)O[H])=O)=O)=NOC)ns1	0.24	2.1	0.74	2	1.7	Shiba, K; Hori, S; Yoshida, M; Shimada, J; Saito, A; Sakai, O. Fundamental and clinical investigation of cefozopran. Chemotherapy (Tokyo) (1993), 41(Suppl. 4), 187-194. fu from Lombardo et al J. Clin. Pharmacol. 2013, 53(2), 167-177 and 178-191	Calculated via WinNonLin from reported plasma data. Fu 0.92 from Hamada T, Ueta E, Kodama H, Osaki T. The excretion of cephem antibiotics into saliva is inversely associated with their plasma protein-binding activities. J Oral Pathol Med. 2002, 31, 109-116.		1986	516.53	14	3	180.7	9	anionic	-1.3	-4.8
Cefpimizole	84880-03-5	[H]N(C([C@@H](c1ccccc1)N([H])C(c1c(C(=O)O[H])ncn1[H])=O)=O)[C@@H]1C2N(C(=C(C[n+]3ccc(CCS(=O)(=O)O[H])cc3)CS2)C(=O)O[H])C1=O	0.21	1.7		2.1	1.8	Lakings DB, Friis JM,Browm RJ, Allen HR (1984) Pharmacokinetics of cefpimizole in hormal humans after single- and multiple-dose intravenous infusion. Antimicr. Agents Chemother. 26, 802-806.	1000 mg dose, data digitized from reported plot N=6, 70-kg average weight 2 0' infusion.		1982	671.68	16	6	240	15	anionic	-3.5	-9
Cefpiramide	70797-11-4	O=C2N1/C(=C(\CS[C@@H]1[C@@H]2NC(=O)[C@@H](c3ccc(O)cc3)NC(=O)C\4=C\N\C(=C/C/4=O)C)CSc5nnnn5C)C(=O)O	0.15	0.48	0.03	5.2	5.4	Conte JE (1987) Pharmacokinetics of cefpiramide in volunteers with normal or impaired renal function. Antimicr. Agents Chemother. 31(10) 1585-1588.	N=10, weight assumes as 70 kg, 2 gram dose as 30 minutes iv infusion. Clp reported as 2 L/h/1.73 m2 and converted using the factor 1.73 m2/70 kg. ppb taken as mid-point as variable across concentrations taken ex-vivo from fu 0.05 at 205 ug/mL (1 hour) to 0.01at 41.1 ug/mL at 8 hours.		1979	612.64	15	5	208.7	9	anionic	-0.78	-3.9
Cefpirome	84957-29-9	CO\N=C(/C(=O)N[C@H]1[C@H]2SCC(=C(N2C1=O)C(=O)[O-])C[n+]3cccc4CCCc34)\c5csc(N)n5	0.24	1.9	0.9	2.1	1.7	Nakayama I, Akieda Y, Yamaji E, Nitta Y, Ohishi M, Katagiri K, Imamura N, and Takase K (1992) Single- and multiple-dose pharmacokinetics of intravenous cefpirome (HR810) to healthy volunteers, J. Clin. Pharmacol. 32: 256-266. Tabata S, Shimura T, Maeda T, Hayashi S, Kobayashi I, and Saito A (1991) Protein binding of cefpirome sulfate in man and animals and its displacing effect on bilirubin bound…			1982	514.58	11	2	153.9	7	anionic	0.7	-1.6
Cefprozil	92665-29-7	C\C=C\C1=C(N2[C@H](SC1)[C@H](NC(=O)[C@H](N)c3ccc(O)cc3)C2=O)C(=O)O	0.21	2.9	0.59	1.2	1.2	Shyu WC, Shah VR, Campbell DA, Wilber RB, Pittman KA, and Barbhaiya RH (1992) Oral absolute bioavailability and intravenous dose-proportionality of cefprozil in humans. J. Clin. Pharm. 32: 798-803. Shyu WC, Shukla UA, Shah VR, Papp EA, and Barbhaiya RH (1991) Simultaneous high-performance liquid chromatographic analysis of cefprozil diastereomers in a pharmacokinetic study. Pharm. Res. 8: 992-996.	Racemate data		1984	389.43	8	4	133	5	zwitterionic	-0.39	-1.8
Cefroxadin	51762-05-1	COC1=C(N2[C@@H]([C@@H](C2=O)NC(=O)[C@@H](C3=CCC=CC3)N)SC1)C(=O)O	0.17	4.78	0.1	0.59	0.74	André Gerardin, Jean B. Lecaillon, Jean P. Schoeiler, Guy Humbert, and Jacqueline Guibert. Pharmacokinetics of Cefroxadin (CGP 9000) in Man. J. Phrmacokin. Biopharm. 1982, 10, 15-26.	CGP900. Cefroxadine. N=4, 50 mg iv. 70 kg average weight. VDss from V1 and k12, k21, k13 and k31. The k13 and k31 values were ony reported for two subjects and they were used for the VDss calculation. Some variability observed for the rate constants but V1 fairly consistent. Text reports the same VDss obtained by those calculations. MRT from the latter and clearance. 95% reported as excreted rena…		1974	365.4	8	3	122	5	zwitterionic	-0.95	-3.5
Cefsulodin	62587-73-9	NC(=O)c1cc[n+](CC2=C(N3[C@H](SC2)[C@H](NC(=O)[C@@H](c4ccccc4)S(=O)(=O)O)C3=O)C(=O)[O-])cc1	0.29	1.96		2.47	1.64	G. Richard Granneman, Lawrence T. Sennello, Robert C. Sanders, Beverly Wynne, and Elizabeth W. Thomas. Cefsulodin kinetics in healthy subjects after intramuscular and intravenous injection. Clin. Pharmacol. 1982, 31, 95-103.	CGP 7174/E. Structure and CAS number corresponding to free acid. N=13 across 3 doses (500 mg N=5; 1000 mg, N= 4; 2000 mg, N= 4). VDss from V1 and k12 and k21. MRT from VDss and clearance.		1978	532.55	12	3	190.9	8	anionic	-3.7	-6.1
Ceftaroline fosamil	229016-73-3	C1(=O)[C@H]([C@@H]2N1C(=C(CS2)Sc1scc(n1)c1cc[n+](cc1)C)C(=O)[O-])NC(=O)/C(=N\OCC)c1nc(sn1)NP(=O)(O)O	0.53	83.6	0.8	0.11	0.09	Ref. through PP. 2010-Oct-15 PDF(2616k) Clinical Pharmacology and Biopharmaceutics Review 200327/S-000 Part 01	N=18, averaged across 3 doses at 50, 100 and 250 mg (N=6 each).	All metabolic (prodrug)	1999	684.68	16	4	223.2	11	anionic	-4.6	-7.1
Ceftazidime	72558-82-8	CC(C)(O\N=C(/C(=O)N[C@H]1[C@H]2SCC(=C(N2C1=O)C(=O)[O-])C[n+]3ccccc3)\c4csc(N)n4)C(=O)O	0.31	2.4	0.79	2.2	1.8	Kalman D, Barriere SL, Johnson BL (1992) Pharmacokinetic disposition and bactericidal activities of cefepime, ceftazidime, and cefoperazone in serum and blister fluid. Antimicrob. Agents Chemother. 36: 453-457. Wise R, Armstrong GC, Brown RM, and Andrews JM (1981) The pharmacokinetics and tissue penetration of ceftazidime and cefamandole in healthy volunteers. J. Antimic. Chemother. 8(SupplB): 27…	VDss calculated for Wise et al from C vs t data provided in the reference. Plasma analysis done by bioassay.		1979	546.58	13	3	191.2	9	anionic	-1.7	-4.1
Ceftezole	26973-24-0	s1cnnc1SCC1=C(N2C(=O)[C@H]([C@H]2SC1)NC(Cn1nnnc1)=O)C(=O)O		5.37			0.64	Ohkawa, Mitsuo; Kuroda, Kyoichi. Pharmacokinetics of ceftezole in patients with normal and impaired renal function. Chemotherapy (Basel, Switzerland) (1980), 26(4), 242-7.	VDss not reported and clerance in ml.min-1.m-2. 1.73 m2/70 kg conversion factor used. N=4, with median weight 53 kg. Normal subjects only. 81% excreted renally. 2 g infusion drip in 2 hr. Very scant plot.		1969	440.48	12	2	156.1	7	anionic	-1.8	-4.8
Ceftizoxime	68401-81-0	CO\N=C(/C(=O)N[C@H]1[C@H]2SCC=C(N2C1=O)C(=O)O)\c3csc(N)n3	0.2	2.1	0.72	1.6	1.5	Yamasaku F and Suzuki Y (1983) Pharmacokinetics of cefotaxime, ceftizoxime and cefmenoxime in healthy volunteers after i.v. constant infusion. Chemotherapy 31: 842-850. Peterson LR, Gerding DN, Van Etta, LL, Eckfeldt JH, and Larson TA (1982) Pharmacokinetics, protein binding, and extravascular distribution of ceftizoxime in normal subjects. Antimic. Agents Chemother. 22: 878-881.	VDss calculated from C vs t data provided in the reference.		1978	383.4	10	3	147.2	5	anionic	-0.22	-3.2
Ceftobiprole	209467-52-7	Nc1nc(ns1)\C(=N\O)\C(=O)N[C@H]2[C@H]3SCC(=C(N3C2=O)C(=O)O)\C=C\4/CCN([C@@H]5CCNC5)C4=O	0.27	1.5	0.62	3	3.3	Schmitt-Hoffmann A, Roos B, Schleimer M, Sauer J, Man A, Nashed N, Brown T, Perez A, Weidekamm E, and Kovacs P (2004) Single dose pharmacokinetics and study of a novel broad-spectrum cephalosporin (BAL5788) in healthy volunteers. Anitmic. Agents Chemother. 48: 2570-2575. Hebeisen P, Heinze-Krauss I, Angehrn P, Hohl P, Page MGP, Then RL (2001) In Vitro and In Vivo Properties of Ro 63-9141, a Novel…	Administered as a prodrg BAL-5788.		1998	534.57	14	5	203.4	6	zwitterionic	-1.5	-4
Ceftolozane	689293-68-3	NCCNC(=O)NC4=CN(CC=3CS[C@H]2N(C(=O)[C@H]2NC(=O)C(=N\OC(C)(C)C(=O)O)/c1nc(N)sn1)C=3C(=O)O)N(C)C4=N	0.17	1.16	0.81	2.39	2.58	Pharmacokinetics and safety of intravenous ceftolozane-tazobactam in healthy adult subjects following single and multiple ascending doses Miller, Benjamin; Hershberger, Ellie; Benziger, David; Trinh, My My; Friedland, Ian Antimicrobial Agents and Chemotherapy (2012), 56(6), 3086-3091.//ppb: https://www.accessdata.fda.gov/drugsatfda_docs/label/2014/206829lbl.pdf. Accessed July 12 2017.	CXA-101. FR 264205. N=6 for three doses, 500, 1000, 2000 mg. Renal clearance reported as essentially complete. 71.4 kg average weight. MRT calculated from Cl and VDss.		2004	666.69	20	8	294.9	12	zwitterionic	-4.7	-9
Ceftriaxone	73384-59-5	Cn1c(nc(=O)c(n1)O)SCC2=C(N3[C@@H]([C@@H](C3=O)NC(=O)/C(=N\OC)/c4csc(n4)N)SC2)C(=O)O	0.12	0.22	0.1	9.6	7.6	Data from PDR. Accessed February 19, 2013. http://www.pdr3d.com/detail.php?c=33025#section-4.	Ro-139904. ROCEPHIN®. Concentration-dependent ppb. 95% at < 25 ug/mLto 85 % at 300 ug/mL.Mid-point taken. 0.5 mg dose in healthy human. 30’ infusion, linear PK at higher doses. Calculation perforrmed via Phoenix with data reported (0.5 mg dose).	Over a 0.15 to 3 gm dose range in healthy adult subjects, the values of elimination half-life ranged from 5.8 to 8.7 hours; apparent volume of distribution from 5.78 to 13.5 L; plasma clearance from 0.58 to 1.45 L/hour; and renal clearance from 0.32 to 0.73 L/hour. Ceftriaxone is reversibly bound to human plasma proteins, and the binding decreased from a value of 95% bound at plasma concentration…	1980	554.58	15	4	215.2	8	anionic	-3.2	-8.4
Cefuroxime	55268-75-2	CO\N=C(/C(=O)N[C@H]1[C@H]2SCC(=C(N2C1=O)C(=O)O)COC(=O)N)\c3occc3	0.15	2.2		1.1	1.1	Gower PE and Dash CH (1977) The pharmacokinetics of cefuroxime after intravenous injection. Eur. J. Clin. Pharmacol. 12: 221-227. Benson JM, Boudinot FD, Pennell AT, Cunningham FE, and DiPiro JT (1993) In vitro protein binding of cefonicid and cefuroxime in adult and neonatal sera. Antimic. Agents Chemother. 37: 1343-1347.	VDss calculated from reported micro rate constants. Concentration dependent protein binding.		1975	424.39	12	3	174.1	8	anionic	-0.19	-3.2
Cefuzonam	82219-78-1	s1c(cnn1)SCC1=C(N2[C@H](SC1)[C@@H](NC(\C(c1csc(n1)N)=N/OC)=O)C2=O)C(=O)O	0.2	4.1	0.12	0.82	1.14	M. TOMISAWA, I. NAKAYAMA, and A. SAITO. Antimicrobial Activity and Pharmacokinetics of L-105, a New Cephem Antibiotic Agent. RECENT ADV. CHEMOTHER.1985, Antimicr. Sect. 2, 891-892.//ppb: Hamada T, Ueta E, Kodama H, Osaki T. The excretion of cephem antibiotics into saliva is inversely associated with their plasma protein-binding activities. J Oral Pathol Med. 2002, 31, 109-116	L-105. Cosmosin. 1 gm dose, N=21 70 kg average weight assumed. MRT from VDss and clearance. Structure refers to neutral compound.	~ 50% urinary excretion.	1982	513.59	12	3	173	8	anionic	0.51	-2.5
CEP-18770	847499-27-8	C(N[C@H](C(N[C@@H](CC(C)C)[B](O)O)=O)[C@@H](C)O)(=O)C(=NC(=C1)C(=C2)C=CC=C2)C=C1	0.87	0.29		50.6	42.1	Sala F et al. Development and validation of a high-performance liquid chromatography–tandemmass spectrometry method for the determination of the novel proteasome inhibitor CEP-18770 in human plasma and its application in a clinical pharmacokinetic study. J. Mass. Spectrom. 2010, 45, 1299–1305	Data digitized from figure 4	Delanzomib. Data received by Dr. M. Zucchetti, Mario Negri Research Institute, Milan, Italy. See also Gallerani, Zucchetti et al. Eur. J. Cancer 2013, 49, 290-296.	2005	413.28	8	5	131.8	9	neutral	1.9	1.9
Cephacetrile	10206-21-0	CC(=O)OCC1=C(N2[C@@H]([C@@H](C2=O)NC(=O)CC#N)SC1)C(=O)O	0.49	3.69		2.21	2.02	A. Dominguez-Gil , M. C. Castifieiras, J. M. Tabernero, J. L. Rodriguez Colmmes and S. de Castro. .Pharmacokinetics of Cephacetrile in Patients with Normal or Impaired Renal Function. Eur. J. Clin. Pharmacol. 1978, 13, 445-448.	Cefacetrile. N=8 subject with normal renal function. 54.4 average weight. 15 mg/kg iv. MRT from VDss and clearance. The latter value calculated via dose divided (A/alpha + B/beta) as AUC . AUC calculated as 67.66 ug.h.mL-1. Comment in text hints a low protein binding but no data available.		1966	339.32	9	2	136.8	7	anionic	-1.5	-4.5
Cephalexin	15686-71-2	CC1=C(N2[C@H](SC1)[C@H](NC(=O)[C@H](N)c3ccccc3)C2=O)C(=O)O	0.21	3.9	0.85	0.89	0.57	Kirby WMM and De Maine JB (1971) Pharmacokinetics of the cephalosporins in healthy volunteers and uremic patients. Postgrad. Med. J. Suppl. 47(Cephalosporin Antibiotics): 41-46.	Pharamacokinetic parameters calculated from C vs t data obtained by digitization of plots included in the reference.		1967	347.39	7	3	112.7	4	zwitterionic	-0.27	-1.6
Cephaloridine	50-59-9	[O-]C(=O)C1=C(C[n+]2ccccc2)CS[C@@H]3[C@H](NC(=O)Cc4cccs4)C(=O)N13	0.46	3.3	0.8	2.3	1.5	Brogard JM, Brandt C, Dorner M, and Dammron A (1976) Adjustment of cephaloridine (Keflodin). Dosage according to its pharmacokinetics. Chemotherapy 22: 1-11. Bergan T (1984) Pharmacokinetics of beta-lactam antibiotics. Scand. J. Infect. Dis. 42(Suppl): 83-98.	VDss calculated from digitized C vs t plot provided in the report.		1915	415.49	7	1	93.4	6	anionic	-1.5	-0.53
Cephalothin	153-61-7	CC(=O)OCC1=C(N2[C@H](SC1)[C@H](NC(=O)Cc3cccs3)C2=O)C(=O)O	0.07	1.8	0.22	0.65	0.95	Bergan T (1977) Comparatve pharmacokinetics of cefazolin, cephalothin, cephacetril, and cephapirine after intravenous administration. Chemother. 23: 389-404. Kuroyama M, Kumano K, Motohashi S, Kimura T, Murase S, and Tomonaga F (1992) Protein binding of 14 cephems in healthy subjects and patients with chronic renal failure. Chemotherapy 40: 898-908.			1962	396.44	8	2	113	7	anionic	0.069	-2.9
Cephapirin	21593-23-7	CC(=O)OCC1=C(N2[C@H](SC1)[C@H](NC(=O)CSc3ccncc3)C2=O)C(=O)O	0.13	2.7	0.55	0.8	1.2	Bergan T (1977) Comparatve pharmacokinetics of cefazolin, cephalothin, cephacetril, and cephapirine after intravenous administration. Chemother. 23: 389-404.			1946	423.46	9	2	125.9	8	anionic	-0.63	-3.6
Cephradine	38821-53-3	CC1=C(N2[C@H](SC1)[C@H](NC(=O)[C@H](N)C3=CCC=CC3)C2=O)C(=O)O	0.21	3.3	0.95	1.1	0.85	Rattie ES, Bernardo PD, and Ravin LJ (1976) Pharmacokinetic interpretation of cephradine levels in serum after intravenous and extravascular administration in humans. Antimic. Agents Chemother. 10: 283-287. Bergan T (1984) Pharmacokinetics of beta-lactam antibiotics. Scand. J. Infect. Dis. 42(Suppl): 83-98.	VDss estimated from C vs t data obtained by digitzation of plots provided in the reference.		1973	349.4	7	3	112.7	4	zwitterionic	0.48	-2
Cerivastatin	145599-86-6	COCc1c(nc(C(C)C)c(\C=C\[C@@H](O)C[C@@H](O)CC(=O)O)c1c2ccc(F)cc2)C(C)C	0.33	2.9	0.01	1.8	1.8	Muck W, Ritter W, Ochmann K, Unger S, Ahr G, Wingender W, and Kuhlmann J (1997) Absolute and relative bioavailability of the HMG-CoA reductase inhibitor cerivastatin. Int. J. Clin. Pharmacol. Ther. 35: 255-260. Baycol Product Label.			1994	459.55	6	3	99.9	11	anionic	4.3	1.1
Cetrorelix	120287-85-6	CC(C)C[C@H](NC(=O)[C@@H](CCCNC(=O)N)NC(=O)[C@H](Cc1ccc(O)cc1)NC(=O)[C@H](CO)NC(=O)[C@@H](Cc2cccnc2)NC(=O)[C@@H](Cc3ccc(Cl)cc3)NC(=O)[C@@H](Cc4ccc5ccccc5c4)NC(=O)C)C(=O)N[C@@H](CCCNC(=N)N)C(=O)N6CCC[C@H]6C(=O)N[C@H](C)C(=O)N	0.39	1.2	0.14	5.4	12	Pechstein B, Nagaraja NV, Hermann R, Romeis P, Locher M, and Derendorf H (2000) Pharmacokinetic-pharmacodynamic modeling of testosterone and luteinizing hormone suppression by cetrorelix in healthy volunteers. J. Clin. Pharmacol. 40: 266-274. Cetrotide Product Label.	VDss calculated from reported micro rate constants.		1988	1431.04	31	17	495.7	39	cationic	1	-2.4
CG200745	936221-33-9	CN(C)CCCNC(=O)\C(=C\CCCCC(=O)NO)\COc1cccc2ccccc12	0.45	1.82		4.1	2.1	Kyu-pyo Kim, Seong Joon Park, Jeong-Eun Kim, Yong Sang Hong, Jae-Lyun Lee, Kyun-Seop Bae, Hyunju Cha, Sool-Ki Kwon, Seonggu Ro, JoongMyung Cho, Tae Won Kim. First-in-human study of the toxicity, pharmacokinetics, and pharmacodynamics of CG200745, a pan-HDAC inhibitor, in patients with refractory solid malignancies. Investigational New Drugs (2015), 33(5), 1048-1057	Data digitized from plot reported at 24 mg/m2. 1.73 m2/70 kg conversion factor used. N=10. Deemed linear across a wide range of doses by authors and no accumulation (d1/d15). Clearance calculated as 7.65 L/hr; reported as 6.92 (+/- 1.31) L/hr at the same dose.		2007	427.54	7	3	90.9	13	cationic	2.4	0.86
CGP15720A	73998-69-3	c1cc(ccc1C(=O)O)NC(=O)NCCN2CCN=C2c3ccncc3	0.35	1.67		3.52	4.9	L. Pendyala, S. Madajewicz, P.J. Creaven. Human pharmacokinetics of 1-[2-[2-(4 pyridyl)-2-imidazolinyl-(1)]-ethyl]-3-(4-carboxyphenyi) urea (CGP 15720A). Invest. New Drugs 1985, 3: 375-381.	N=17, multiple dose levels from 0.5-3 mg/m2/day, 70 kg assumed and average seemingly from multiple levels. MRT from VDss and clearance.	renal clearance ~ 60% of total	1979	353.38	8	3	106.9	6	zwitterionic	1.5	-0.84
CGP31608	107740-67-0	C[C@H]([C@@H]1[C@@H]2N(C1=O)C(=C(S2)CN)C(=O)O)O	0.23	7.67		0.5	0.5	R. Wise, J. M. Webberky, J. M. Andrews and J. P. Asbby. The pharmacokinetics and tissue penetration of intravenously administered CGP 31608. Journal of Antimicrobial Chemotherapy (1988) 21, 85-91	Data digitzed from plot reported. 1 g administered to N=6 volunteers in 1 hr infusion. 82.2 kg average weight. Calculated AUCinf essentially identical to reported value.		1985	244.27	6	3	103.9	3	zwitterionic	-2.4	-4.7
CGP36742	123690-78-8	O=[P@@](O)(CCCC)CCCN		1.56			2.1	Christoph H. Gleiter, Gisbert Forger, Huns-jorg Mobius. Pharmacokinetics of CGP 36,742, an orally active GABAB antagonist, in human. J Clln PharmacoI 1996, 36, 428-438.	N=12, 600 mg dose in 15' infusion. 0.28 L/kg VD, likely to be VDz.	Identical total and renal clearance.	1989	179.2	3	2	63.3	6	zwitterionic	0.68	-1.6
Chenodeoxycholic acid	474-25-9	C[C@H](CCC(=O)O)[C@H]1CC[C@H]2[C@@H]3[C@H](O)C[C@@H]4C[C@H](O)CC[C@]4(C)[C@H]3CC[C@]12C	0.19	5.7		0.57	1.42	van Berge-Henegouwen GP, Hofmann AF. Pharmacology of chenodeoxycholic acid. II. Absorption and metabolism. Gastroenterol. 1977, 73, 300-309.	Chenic acid. Data digitized from plot and converted from % dose/mL into mas/volume units. Radiocativity measured but it was determined that there was no circulating metabolites from GC and total radioactivity determination (same AUC) after po dosing. Data digitized and PK parameters calculated via PKsolver. No usable reported data available. 1 mg total dose assumed to convert concentration data. …		1924	392.57	4	3	77.8	4	anionic	4.4	2
Chlorambucil	305-03-3	OC(=O)CCCc1ccc(cc1)N(CCCl)CCCl	0.26	2.8	0.01	1.5	1.1	Newell DR, Calvert AH, Harrap KR, and McElwain TJ (1983) Studies on the pharmacokinetics of chlorambucil and prednimustine in man. Br. J. Clin. Pharmacol. 15: 253-258. Leukeran Product Label.	VDss calculated from C vs t data obtained by digitization of plots provided in the reference for two subjects administered a 10 mg dose.		1953	304.21	3	1	40.5	9	anionic	3.8	1.2
Chloramphenicol	56-75-7	OC[C@@H](NC(=O)C(Cl)Cl)[C@H](O)c1ccc(cc1)N(=O)=O	0.94	2.4	0.34	6.5	4.6	Narang APS, Datta DV, Nath N, and Mathur VS (1981) Pharmacokinetic study of chloramphenicol in patients with liver disease. Eur. J. Clin. Pharmacol. 20: 479-483. Kurz H, Mauser-Ganshorn A, and Stickel HH (1977) Differences in the binding of drugs to plasma proteins from newborn and adult man. I. Eur. J. Clin. Pharmacol. 11: 463-467.	One compartment pharmacokinetics, so VDc = VDss.		1970	323.13	7	3	115.4	6	neutral	0.54	0.54
Chlorazepate	23887-31-2	OC(=O)C1N=C(c2ccccc2)c3cc(Cl)ccc3NC1=O	0.2	1.1		3	2.4	Bertler A, Lindgren S, Magnusson JO, and Malmgren H (1983) Pharmacokinetics of chlorazepate after intravenous and intramuscular administration. Psychopharmacol. 80: 236-239.	VDss calculated from digitized C vs t plot provided in the report.		1970	314.72	5	2	78.8	2	anionic	2.4	-0.91
Chlordiazepoxide	58-25-3	CNC1=Nc2ccc(Cl)cc2C(=N(=O)C1)c3ccccc3	0.25	0.37	0.056	11	8.3	Desmond PV, Patwardhan RV, Schenker S, and Hoyumpa AM (1980) Short-term ethanol administration impairs the elimination of chlordiazepoxide (Librium) in man. Eur. J. Clin. Pharmacol. 18: 275-278. Boxenbaum HG, Geitner KA, Dixon WR, Spiegel HE, Symington J, Christian R, Moore JD, Weissman L, and Kaplan SA (1977) Pharmacokinetic and biopharmaceutic profile of chlordiazepoxide HCl in healthy subjects…			1955	299.75	4	1	53.1	2	neutral	1.4	1.4
Chlormethiazole	533-45-9	Cc1ncsc1CCCl	6.6	33	0.36	3.3	4.5	Neuvonen PJ, Pentikainen PJ, Jostell KG, and Syvalahti E (1981) Effect of ethanol on the pharmacokinetics of chlormethiazole in humans. Int. J. Clin. Pharmacol. Ther. Toxicol. 19: 552-560. Jostell KG, Agurell S, Allgen LG, Kuylenstierna B, Lindgren JE, Aberg G, and Osterlot G (1978) Pharmacokinetics of clomethiazole in healthy adults. Acta Pharmacol. Toxicol. 43: 180-189. Moore RG, Triggs EJ, Sha…	VDss calculated from reported micro rate constants in the references by Moore, et al., and Jostell, et al.		1935	161.65	1	0	12.9	2	neutral	1.9	1.9
Chlorophenylpiperazine, m-	51639-49-7	Clc1cccc(c1)N2CCNCC2	2.5	6.1		7	4.7	Feuchtl A, Bagli M, Stephan R, Frahnert C, Kolsch H, Kuhn KU, and Rao ML (2004) Pharmacokinetics of m-chlorophenylpiperazine after intravenous and oral administration in healthy male volunteers: implications for the pharmacodynamic profile. Pharmacopsychiatry 37: 180-188.			1974	196.68	2	1	15.3	1	cationic	2.3	0.61
Chloroquine	54-05-7	CCN(CC)CCCC(C)Nc1ccnc2cc(Cl)ccc12	140	4.1	0.43	740	570	White NJ (1985) Clinical pharmacokinetics of antimalaria drugs. Clin. Pharmacokinet. 10: 187-215. Aderounmu AF, Salako LA, Lindstroem B, Walker O, and Ekman L (1986) Comparison of the pharmacokinetics of chloroquine after single intravenous and intramuscular administration in healthy Africans. Br. J. Clin. Pharmacol. 22: 559-564.			1974	319.87	3	1	28.2	8	cationic	5.3	2
Chlorpheniramine	132-22-9	CN(C)CCC(c1ccc(Cl)cc1)c2ccccn2	3.3	2.5	0.7	22	22	Huang SM, Athanikar NK, Sridhar K, Huang YC, and Chiou WL (1982) Pharmacokinetics of chlorpheniramine after intravenous and oral administration in normal adults. Eur. J. Clin. Pharmacol. 22: 359-365. Hiep BT, Gimenez F, Khanh V, Hung NK, Thuillier A, Farinotti R, and Fernandez C (1999) Binding of chlorpheniramine enantiomers to human plasma proteins. Chirality 11: 501-504.			1949	274.79	2	0	16.1	5	cationic	3.3	1.4
Chlorpromazine	50-53-3	CN(C)CCCN1c2ccccc2Sc3ccc(Cl)cc13	10	16	0.056	10	11	Yeung PKF, Hubbard JW, Korchinski ED, and Midha KK (1993) Pharmacokinetics of chlorpromazine and key metabolites. Eur. J. Clin.Pharmacol. 45: 563-569. Koytchev R, Alken RG, Kirkov V, Neshev G, Vagaday M, and Kunter U (1994) Absolute bioverfugbarkeit von chlorpromazin, promazin, und promethazin. Arz. Forsch. 44: 121-125. Curry SH (1970) Plasma protein binding of chlorpromazine. J. Pharm. Pharmacol…	VDss was calculated from C vs t data obtained by digitization of the plot included in the reference. Protein binding value cited is at a concentration observed in the pharmacokinetic study.		1972	318.86	2	0	6.5	4	cationic	5.2	3.6
Chlorpropamide	94-20-2	CCCNC(=O)NS(=O)(=O)c1ccc(Cl)cc1	0.19	0.045	0.03	70	46	Huupponen R and Lammintausta R (1981) Chlorpropamide bioavailability and pharmacokinetics. Int. J. Clin. Pharmacol. Ther. Toxicol. 19: 331-333.	VDss was calculated from C vs t data obtained by digitization of the plot included in the reference.		1955	276.74	5	2	75.3	4	anionic	2.1	-0.29
Chlorprothixene	113-59-7	CN(C)CC\C=C/1\c2ccccc2Sc3ccc(Cl)cc13	13.7	11.5		20.7	25.8	Bagli, Metin; Rao, Marie Luise; Hoeflich, Gereon; Kasper, Siegfried; Langer, Michael; Barlage, Uwe; Beneke, Manfred; Sueverkruep, Richard; Moeller, Hans-Juerger Pharmacokinetics of Chlorprothixene after Single Intravenous and Oral Administration of Three Galenic Preparations. Arzneimittel-Forschung 1996, 46(3), 247-250.	N=8, 75.6 kg average weight, 100 mg dose as a 60 minutes infusion.		1958	315.86	1	0	3.2	3	cationic	5.5	4.2
Chlortetracycline	57-62-5	CN(C)[C@H]1[C@@H]2C[C@H]3C(=C(O)[C@]2(O)C(=O)C(=C1O)C(=O)N)C(=O)c4c(O)ccc(Cl)c4[C@@]3(C)O	0.9	2	0.52	7.4	7	Kunin CM, Darnbush AC, and Finland M. Distribution and excretion of four tetracycline analogs in normal young men. J. Clin. Invest. 1959, 38, 1950-1963.	Parameters were calculated from C vs t data obtained by digitization of the plot included in the reference.		1945	478.88	10	6	181.6	2	anionic	-0.2	-3.1
Chlorthalidone	77-36-1	NS(=O)(=O)c1cc(ccc1Cl)C2(O)NC(=O)c3ccccc23	3.9	1.5	0.24	43	36	Fleuren HLJ, Thien TA, Verwey-van Wissen CPW, and von Rossum JM (1979) Absolute bioavailability of chlorthalidone in man: a cross over study after intravenous and oral administration. Eur. J. Clin. Pharmacol. 15: 35-50. Dieterle W, Wagner J, and Faigle JW (1976) Binding of chlorthalidone (Hygroton) to blood components in man. Eur. J. Clin. Pharmacol. 10: 37-42.			1959	338.77	6	3	109.5	2	neutral	0.85	0.84
Cibenzoline	53267-01-9	C1CN=C(N1)C2CC2(c3ccccc3)c4ccccc4	4.1	8.6	0.5	7.8	7.3	Cifenline. Aronoff G, Brier M, Mayer ML, Barbalas M, Aogaichi K, Sloan R, Brazzell R, and Massarella J (1991) Bioavailability and kinetics of cibenzoline in patients with normal and impaired renal function. J. Clin. Pharmacol. 31: 38-44. Reidenberg MM, Lorenzo BJ, Drayer DE, Kluger J, Nestor T, Regnier JC, Kowal BA, and Bekersky I (1988) A nonradioactive iothalamate method for measuring glomerula…			1974	262.35	2	1	24.4	3	cationic	2.8	-0.64
Cicaprost	94079-80-8	CCC#CC[C@H](C)[C@H](O)C#C[C@H]1[C@H](O)C[C@@H]2C\C(=C/COCC(=O)O)\C[C@H]12	0.08	3.8		0.35	1.1	Hildebrand M, Staks T, Schutt A, and Matthes H (1989) Pharmacokinetics of 3H-cicaprost in healthy volunteers. Prostaglandins 37: 259-273.	VDss was calculated from MRT from a paper cited in the reference.		1984	374.47	5	3	87	10	anionic	2.6	-0.63
Ciclesonide	126544-47-6	C1(C=C[C@@]2([C@H]3[C@H](C[C@@]4([C@@]5([C@@H](C[C@@H]4[C@@H]3CCC2=C1)O[C@H](C1CCCCC1)O5)C(COC(C(C)C)=O)=O)C)O)C)=O	2.9	33.3	0.01	1.45	1.04	Nave R. Clinical pharmacokinetic and pharmacodynamic profile of inhaled ciclesonide. Clin Pharmacokinet. 2009, 48(4), 243–252.	Data from review article Clin. Pharmacokinet. 2009, 48, 243-252, confirmed by Dr. R. Nave, e-mail 7/27/2009. VDss 2.9 L/kg and 2.0 L/h/kg. No full publication available for this presentation/abstract. MRT from VDss and clearance.// Nave R, Bethke TD, van Marle SP, Zech K (2004) Pharmacokinetics of [14C]ciclesonide after oral and intravenous administration to healthy subjects. Clin. Pharmacokin. 4…	E-mail message, July 27 2009. For ciclesonide our focus is always the active metabolite. Nevertheless we have generated a few data for the parent compound ciclesonide following iv administration (reference 29 of the review manuscript). The data of this study were presented in 2002 on a congress and in the abstract the following is stated: "The mean volume of distribution was 2.9 l/kg and the tota…	1992	540.69	7	1	99.1	6	neutral	4.8	4.8
Ciclotropium	764602-65-5	CC([N@+]1([C@@H]2C[C@@H](C[C@@H]1CC2)OC(=O)[C@@H](C3CCCC3)c4ccccc4)C)C	1.25	8.41		2.48	3.3	Liebmann B, Mayer S, Mutschler E, Spahn-Langguth H. Studies on the metabolic clearance of ciclotropium to alpha-phenylciclopentylacetic acid using a new enantiospecific metabolite assay. Arzneim.-Forsch. 1992, 42, 1354-1358.	2 volunteers, 70 kg average weight assumed, compound administered at a dose of 10 mg as 15' infusion. Volunteer 1 yielded an AUC0-inf with 1% from reported (rep, 268 ng.h.mL-1), volunteer 2 yielded an AUC0-inf within 12% of reported (rep. 342 ng.h.mL-1). Data digitized separately and PK parameters averaged after calculations. 82% recovered unchanged in urine.		1982	370.55	3	0	26.3	6	neutral	1.6	1.6
Cidofovir	113852-37-2	NC1=NC(=O)N(C[C@@H](CO)OCP(=O)(O)O)C=C1	0.49	2.5	1	3.3	2.6	Cundy KC, Petty BG, Flaherty J, Fisher PE, Polis MA, Wachsman M, Lietman PS, Lalezari JP, Hitchcock MJM, and Jaffe HS (1995) Clinical pharmacokinetics of cidofovir in human immunodeficiency virus-infected patients. Antimic. AgentsChemother. 39: 1247-1252.			1987	279.19	9	4	145.7	6	anionic	-3.2	-8.4
Cilastatin	82009-34-5	CC1(C)C[C@@H]1C(=O)N\C(=C/CCCCSC[C@H](N)C(=O)O)\C(=O)O	0.15	2.3	0.6	1.1	0.86	Saito A. Pharmacokinetics of panipenem/betamipron. Chemotherapy 1991, 39(Suppl. 3): 227-235. Primaxin IV Product Label.	VDss calculated from C vs t data provided in the reference.		1983	358.45	7	4	129.7	11	anionic	-0.068	-4.6
Cilazaprilat	90139-06-3	c1ccc(cc1)CC[C@H](N[C@@H]1C(N2[C@@H](CCC[N@@]2CCC1)C(O)=O)=O)C(O)=O	3.7	2.1		29.5	50.6	P. E. O. WILLIAMS, A. N. BROWN, S. RAJAGURU, R. J. FRANCIS, G. E. WALTERS, J. McEWEN & C. DURNIN. The pharmacokinetics and bioavailability of cilazapril in normal man. Br. J. Clin. Pharmacol. 1989, 27, 181S-188S	N=12, 74 kg average weight, 2.5 mg dose. Reported AUC (0-24) = 192 ng.hr/mL Clearance (24hr) = 12.3 L/h (= 2.8 mL/min/kg) ppb variable from 24% at high concentration and 95% at low concentration (not reported)	91% excreted unchanged as per Williams et al.	1984	389.45	8	3	110.2	7	anionic	0.35	-5.4
Cilengitide	188968-51-6	N1(C)C([C@H](NC([C@@H](NC(CNC([C@H](CCCNC(N)=N)NC([C@@H]1C(C)C)=O)=O)=O)CC(=O)O)=O)Cc1ccccc1)=O	0.26	1.18		3.67	3.6	Phase I and pharmacokinetic study of continuous twice weekly intravenous administration of Cilengitide (EMD 121974), a novel inhibitor of the integrins avb3 and avb5 in patients with advanced solid tumours F.A.L.M. Eskens, H. Dumezb, R. Hoekstra, A. Perschl, C. Brindley, S. Bottcher,W. Wynendaele, J. Drevs, J. Verweij, A.T. van Oosterom European Journal of Cancer 39 (2003) 917–926	(EMD121974) Weighted averages of 40 total patients across doses from 30 to 1600 mg/m2. MRT calculated from averaged VDss and clearance.		1997	588.66	15	8	235.9	10	zwitterionic	-1.4	-3.7
Cilomilast	153259-65-5	COc1ccc(cc1OC2CCCC2)[C@@]3(CC[C@H](CC3)C(=O)O)C#N	0.23	0.5	0.006	8.5	7.9	Zussman BD, Davie CC, Kelly J, Murdoch RD, Clark DJ, Schofield JP, Walls C, Birrell C, Webber D, Quinlan J, Ritchie SY, and Carr A (2001) Bioavailability of the oral selective phosphodiesterase 4 inhibitor cilomilast. Pharmacother. 21: 653-660. Down G, Siederer S, Lim S, and Daley-Yates P (2006) Clinical pharmacology of cilomilast. Clin. Pharmacokinet. 45: 217-233.			1993	343.42	5	1	79.6	6	anionic	3.6	0.89
Cimetidine	51481-61-9	CN\C(=N/CCSCc1nc[nH]c1C)\NC#N	1.2	8.1	0.78	2.5	2.2	Arancibia A, Schindler I, Paccot E, Ruiz I, Gonzalez G, Mella F, and Thambo S (1985) Pharmacicinetique de la cimetidine apres administration d'une dose unique par voie intraveineuse rapide et d'une autre par voie orale. Therapie 40: 87-92. Bauer LA, Wareing-Tran C, Edwards WAD, Raisys V, Ferreri L, Jack R, Dellinger EP, and Simonowitz D (1985) Cimetidine clearance in the obese. Clin. Pharmacol. T…			1963	252.34	6	3	88.9	8	neutral	-0.23	-0.29
Cimetropium	150521-16-7	C[N+]1([C@@H]2C[C@H](C[C@H]1[C@H]3[C@@H]2O3)OC(=O)[C@H](CO)c4ccccc4)CC5CC5	1.12	25		0.74	0.83	B. P. IMBIMBO, S. DANIOTTI, A. VIDI, D. FOSCHI, F . SAPORITI, L. FERRANTE. Discontinuous Oral Absorption of Cimetropium Bromide, a New Antispasmodic Drug. J. Pharm. Sci. 1986, 75, 680-684.	N=8, 10 mg dose. Clearance reported in table III. MRT calculated from AUC and AUMC in turn calculated from A, B, α and β. VDss obtained from MRT and clearance. T1/2 reported.	46% excreted unchanged in urine.	1973	358.45	5	1	59.1	7	neutral	-2.8	-2.8
Cinacalcet	226256-56-0	c1cccc2cccc(c12)[C@H](NCCCc1cc(C(F)(F)F)ccc1)C	17.6	18.3	0.05	16	19.9	Ref. through PP. 2004-Feb-12 PDF(1502k) Pharmacology Review 021688/S-000 Part 01	Cinacalcet is approximately 93% to 97% bound to plasma protein(s).	reported as extensively metabolize and then excreted in urine but no defined amounts. See ref. for PK data.	2001	357.41	1	1	12	6	cationic	6.6	5.1
Cinaciguat	329773-35-5	[H]OC(CCCCN(CCc1ccccc1OCc1ccc(CCc2ccccc2)cc1)Cc1ccc(cc1)C(=O)O[H])=O	0.24	9		0.44	0.25	Frey R, Mück W, Unger S, Artmeier-Brandt U, Weimann G, Wensing G: Pharmacokinetics, pharmacodynamics, tolerability, and safety of the soluble guanylate cyclase activator cinaciguat (BAY 58-2667) in healthy male volunteers. J Clin Pharmacol 2008, 48:1400-1410	Weighted average of 5 doses from 50 ug/h to 250 ug/h infusion (4 hour). N=28 total, average weight 81.8 kg. Also known as BAY 58-2667. t1/2 used reported as dominant, i.e. determined in the 1-hr period after end of infusion.		2001	565.7	6	2	87.1	19	anionic	7.4	2.5
Ciprofloxacin	85721-33-1	OC(=O)C1=CN(C2CC2)c3cc(N4CCNCC4)c(F)cc3C1=O	2.1	8.3	0.7	4.2	3.8	Bergogne-Berezin E (2002) Clinical role of protein binding of quinolones. Clin. Pharmacokinet 41: 741-750. Jaehde U, Soergel F, Reiter A, Sigl G, Naber KG, and Schunack W (1995) Effect of probenecid on the distribution and elimination of ciprofloxacin in humans. Clin. Pharmacol. Ther. 58: 532-541. Lettieri JT, Rogge MC, Kaiser L, Echols RM, and Heller AH (1992) Pharmacokinetic profiles of ciprofl…			1983	331.34	6	2	72.9	3	zwitterionic	1.8	-0.63
Ciramadol	51356-59-3	c1cc(cc(c1)O)[C@@H]([C@@H]1[C@@H](CCCC1)O)N(C)C		2.2			3.85	M. T. ROSSEEL, M. G. BOGAERT, and W. OOSTERLINCK. Preliminary pharmakokinetics of intravenous ciramadol in humans. Int. J. Pharmacol. Ther. Toxicol. 1984, 22, 304-306.	N=8, 70 kg average weight assumed, 30 mg dose. Data difficult to digitize from plot resulting in exceesive extrapolation to Co. Clearance and t1/2 taken from reported values. Vdarea 0.8 L/kg.		1977	249.35	3	2	43.7	3	cationic	2.7	2.1
Cisapride	81098-60-4	c1(c(cc(N)c(c1)Cl)OC)C(N[C@@H]1[C@@H](C[N@@](CCCOc2ccc(F)cc2)CC1)OC)=O	1.2	1.5	0.02	12.9	11.7	Ref. through PP. 1992-Mar-17 PDF(7171k) Medical/Clinical Review 020210/S-000. ppb: PDR states: PROPULSID® binds to an extent of 97.5-98% to plasma proteins, mainly to albumin. Accessed December 301 2014. http://www.pdr3d.com/detail.php?c=10088#section-5	Calculation perforrmed via Phoenix after digitization. 4 mg dose. N=6	Ref. through PP. 1992-Mar-17 PDF(7171k) Medical/Clinical Review 020210/S-000	1983	465.95	7	2	86	9	cationic	3.5	3
Cisatracurium	96946-41-7	COc1ccc(C[C@@H]2c3cc(OC)c(OC)cc3CC[N@+]2(C)CCC(=O)OCCCCCOC(=O)CC[N@@+]4(C)CCc5cc(OC)c(OC)cc5[C@H]4Cc6ccc(OC)c(OC)c6)cc1OC	0.14	5.4	0.62	0.43	0.42	Bergeron LB, Bevan DR, Berrill A,Kahwaji R, and Varin F (2001) Concentration–Effect Relationship of Cisatracurium at Three Different Dose Levels in the Anesthetized Patient. Anesthesiology 95: 314-323. Roy JJ and Varin F (2004) Physicochemical properties of neuromuscular blocking agents and their impact on the pharmacokinetic-pharmacodynamic relationship. Br. J. Anaesth. 93: 241-248.			1995	929.15	14	0	126.4	26	neutral	1.7	1.7
Citalopram	59729-33-8	CN(C)CCCC1(OCc2cc(ccc12)C#N)c3ccc(F)cc3	12	4.3	0.2	47	33	Joffe P, Larsen FS, Pedersen V, Ring-Larsen H, Aaes-Jorgensen T, and Sidhu J (1998) Single-dose pharmacokinetics of citalopram in patients with moderate renal insufficiency or hepatic cirrhosis compared with healthy subjects. Eur. J. Clin. Pharmacol. 54: 237-242. Celexa Product Label.	VDss calculated from C vs t data obtained by digitization of the plot provided in the reference.		1977	324.39	3	0	36.3	6	cationic	4.1	2
Cladribine	4291-63-8	Nc1nc(Cl)nc2c1ncn2[C@H]3C[C@H](O)[C@@H](CO)O3	7.7	14	0.79	9.2	16	Saven A, Cheung WK, Smith L, Moyer M, Johannsen T, Rose E, Gollard R, Kosty M, Miller WE, and Piro LD (1996) Pharmacokinetic study of oral and bolus intravenous 2-chlorodeoxyadenosine in patients with malignancy. J. Clin. Oncol. 14: 978-983. Albertioni F, Herngren L, Juliusson G, and Liliemark J (1994) Protein binding of 2-chloro 2'-deoxyadenosine (cladribine) in healthy subjects and in patients …			1963	285.69	8	3	119.3	2	neutral	-0.56	-0.56
Clarithromycin	81103-11-9	CC[C@H]1OC(=O)[C@H](C)[C@@H](O[C@H]2C[C@@](C)(OC)[C@@H](O)[C@H](C)O2)[C@H](C)[C@@H](O[C@@H]3O[C@H](C)C[C@@H]([C@H]3O)N(C)C)[C@@](C)(C[C@@H](C)C(=O)[C@H](C)[C@@H](O)[C@]1(C)O)OC	1.5	7.3	0.23	3.4	2.8	Chu SY, Deaton R, and Cavanaugh J (1992) Absolute bioavailability of clarithromycin after oral administration in humans. Antimic. Agents Chemother. 36: 1147-1150. Kuroyama M, Motohashi S, Kumano K, and Yago K (1996) Protein binding of clarithromycin in patients with chronic renal failure. Jap. J. Antibiotics 49: 256-263. Davey PG (1991) The pharmacokinetics of clarithromycin and its 14-OH metabol…	VDss calculated from C vs t sata obtained by digitization of the plot provided in the reference		1981	747.95	14	4	182.9	8	cationic	2.3	1
Clavulanic Acid	58001-44-8	OC\C=C\1/O[C@@H]2CC(=O)N2[C@H]1C(=O)O	0.22	3.1	0.91	1	0.9	Davies BE, Boon R, Horton R, Reubi FC, and Descoeudres CE (1988) Pharmacokinetics of amoxycillin and clavulanic acid in haemodialysis patients following intravenous administration of Augmentin. Br. J. Clin. Pharmacol. 26: 385-390. de la Pena A and Derendorf H (1999) Pharmacokinetic properties of beta-lactamase inhibitors. Int. J. Clin. Pharmacol. Ther. 37: 63-75.			1975	199.16	6	2	87.1	2	anionic	-1.2	-4.6
Clazosentan	180384-56-9	[H]N(c1c(c(nc(c2ccnc(c2)c2nnnn2[H])n1)OCCO[H])Oc1ccccc1OC)S(c1ccc(C)cn1)(=O)=O	0.23	10.5	0.02	0.4	2.6	van Giersbergen, Paul L. M.; Gunawardena, Kulasiri A.; Dingemanse, Jasper. Influence of ethnic origin and sex on the pharmacokinetics of clazosentan. J. Clin. Pharmacol. 2007, 47, 1374-1380.//ppb: P.L.M. van Giersbergen, A. Treiber and J. Dingemanse. In vitro and in vivo pharmacokinetic characteristics of clazosentan, an intravenous endothelin receptor antagonist, in humans. Int. J. Clin. Pharmac…	12 Caucasian and 12 Japanese subjects. 3 sequential 4-h infusion at 1, 5 and 15 mg/h. Average weight 61 kg. Compartmental analysis with V1,V2,V3 and Vss reported. MRT calculated from Cl and Vss. t1/2 taken as the g phase.		1996	577.57	15	3	200.1	12	anionic	2.9	-2.3
Clentiazem	96125-53-0	c1([C@H]2[C@H](C(N(CCN(C)C)c3c(cc(cc3)Cl)S2)=O)OC(C)=O)ccc(OC)cc1	9.7	13.7	0.1	12.3	10.6	Ajit K. Shah, Vi jay 0. Bhargava, Scott J. Weir, and Dennis H. Giesing. Pharmacokinetics of Clentiazem After Intravenous and Oral Administration in Healthy Subjects. J ClIn Pharmacol 1993;33:354-359. ppb Fukushima, Takeshi; Nakamura, Susumu; Ito, Yutaka; Takaiti, Osasi. Studies on the protein binding of clentiazem. Yakubutsu Dotai 1992, 7, 845-852. From abstract in English. reported as ~90% bound…	Data reported in Table 2. 20 mg dose. N=24. Weight reported as 77.6 kg on average.		1984	448.96	6	0	59.1	7	cationic	3.9	3.5
Clevidipine	167221-71-8	CCCC(=O)OCOC(=O)C1=C(C)NC(=C(C1c2cccc(Cl)c2Cl)C(=O)OC)C	0.58	142	0.0038	0.07	0.3	Ericsson H, Fakt C, Hoglund L, Jolin-Mellgard A, Nordlander M, Sunzel M, and Regardh CG (1999) Pharmacokinetics and pharmacodynamics of clevidipine in healthy volunteers after intravenous infusion. Eur. J. Clin. Pharmacol. 55: 61-67. Ericsson H, Tholander B, and Regardh CG (1999) In vitro hydrolysis rate and protein binding of clevidipine, a new ultrashort-acting calcium antagonist metabolized by…	Data for the enantiomers were averaged.		1995	456.32	7	1	90.9	10	neutral	4.4	4.4
Clinafloxacin	105956-97-6	NC1CCN(C1)c2c(F)cc3C(=O)C(=CN(C4CC4)c3c2Cl)C(=O)O	1.9	4.7	0.96	6.7	5.4	Randinitis EJ, Brodfuehrer JI, Eiseman I, and Vassos AB (2001) Pharmacokinetics of clinafloxacin after single and multiple doses. Antimic. Agents Chemother. 45: 2529-2535. Wise R, Ashby JP, and Andrews JM. In vitro activity of PD 127,391, an enhanced-spectrum quinoline. Antimic. Agents Chemother. 1988, 32: 1251-1256.			1986	365.79	6	2	86.9	3	zwitterionic	2.6	0.29
Clindamycin	18323-44-9	CCC[C@@H]1C[C@H](N(C)C1)C(=O)N[C@H]([C@H](C)Cl)[C@H]2O[C@H](SC)[C@H](O)[C@@H](O)[C@H]2O	0.79	4.5	0.06	2.9	2.1	Gatti G, Flaherty J, Bubp J, White J, Borin M, and Gambertoglio J (1993) Comparative study of bioavailabilities and pharmacokinetics of clindamycin in healthy volunteers and patients with AIDS. Antimic. Agents Chemother. 37: 1137-1143. Gordon RC, Regamey C, and Kirby WMM (1973) Serum protein binding of erythromycin, lincomycin, and clindamycin. J. Pharm. Sci. 62: 1074-1077.			1958	424.98	7	4	102.3	7	cationic	1.3	0.96
Clodronate	10596-23-3	C(P(O)(O)=O)(P(O)(O)=O)(Cl)Cl	0.88	1.6	0.64	9.2	43.2	Pharmacokinetics of clodronate in renal failure. H. Saha, P. Castren-Kortekangas, S. Ojanen, A. Juhakoski, J. Tuominen, O. Tokola, A. Pasternack. Journal of Bone and Mineral Research 1994, 9, 1953–1958.//ppb: Pentikäinen PJ1, Elomaa I, Nurmi AK, Kärkkäinen S. Pharmacokinetics of clodronate in patients with metastatic breast cancer. Int J Clin Pharmacol Ther Toxicol. 1989, 27, 222-228.	Weighted average of 3 control groups. 30 mg for each group. Weighted average of control weights in Table 1 taken as 73.5 kg.		1966	244.89	6	4	115.1	2	anionic	-1.2	-7.5
Clofarabine	123318-82-1	n1c(N)c2c(nc1Cl)n([C@H]1[C@H]([C@@H]([C@H](O1)CO)O)F)cn2	1.75	7.7	0.53	3.8	4	Clofarabine administration weekly to adult patients with advanced solid tumors in a phase I dose-finding studyJournal of Clinical Oncology, 2005 ASCO Annual Meeting Proceedings. Vol 23, No. 16S, Part I of II (June 1 Supplement), 2005: 7109. C. C. Cunningham, J. Nemunaitis, N. Senzer, S. Vukelja, D. Richards, V. Vukovic, S. Weitman	See also data reported by Bonate et al. Nat. Rev. Drug Disc. 2006, 5, 855-863. ppb 0.43		1989	303.68	8	3	119.3	2	neutral	-0.77	-0.77
Clomipramine	303-49-1	CN(C)CCCN1c2ccccc2CCc3ccc(Cl)cc13	13	8.2	0.029	26	26	Ollagnier M, Pellet J, Gay JP, Lang F, Ouvry MC, and Blanchon Y (1984) Pharmacocinetique d'une dose unique de clomipramine, en intraveneuse, chez le voluntaire sain. Therapie 39: 237-245. Nyberg G and Maartensson E (1984) Determination of free fractions of tricyclic antidepressants. Naunyn-Sch. Arch. Pharmacol. 327: 260-265.	Pharmacokinetic parameters were calculated from C vs t provided in the reference.		1961	314.85	2	0	6.5	4	cationic	5.1	3.4
Clonazepam	1622-61-3	Clc1ccccc1C2=NCC(=O)Nc3ccc(cc23)N(=O)=O	2.9	0.88	0.15	55	38	Crevoisier C, Delisle MC, Joseph I, and Foletti G (2003) Comparative single-dose pharmacokinetics of clonazepam following intravenous, intramuscular and oral administration to healthy volunteers. Eur. Neurol. 49: 173-177. Lucek RW and Coutinho CB. (1976) The role of substituents in the hydrophobic binding of the 1,4-benzodiazepines by human plasma proteins. Molec. Pharmacol. 12: 612-19.	VDss calculated using C vs t data obtained by digitization of the plot included in the reference.		1963	315.71	6	1	87.3	2	neutral	2.7	2.7
Clonidine	4205-90-7	Clc1cccc(Cl)c1NC2=NCCN2	3.3	4	0.56	14	7.6	Vanholder R, Van Landschoot N, De Smet R, Schoots A, and Ringoir S (1988) Drug protein binding in chronic renal failure: evaluation of nine drugs. Kidney Int. 33: 996-1004. Frisk-Holmberg M, Paalzow L, and Edlund PO (1981) Clonidine kinetics in man-evidence for dose dependency and changed pharmacokinetics during chronic therapy. Br. J. Clin. Pharmacol. 12: 653-658.	Used 1.27 mg/kg dose level data from Frisk-Holmberg et al. VDss calculated from reported exponential fit parameters.		1971	230.09	3	2	36.4	2	cationic	2	0.84
Clopidogrel	113665-84-2	COC(=O)[C@H](c1ccccc1Cl)N2CCc3c(ccs3)C2	2.01	23.65	0.02	1.42	5.06	Daniel J Cushing, Paul F Souney, Warren D Cooper Gerald L Mosher,Michael P Adams, Stephen Machatha, Bing Zhang and Peter R Kowey. Pharmacokinetics and platelet aggregation inhibitory effects of a novel intravenous formulation of clopidogrel in humans. Clin. Exp. Pharmacol. Physiol. 2012 39, 3–8.//ppb: https://www.accessdata.fda.gov/drugsatfda_docs/label/2009/020839s044lbl.pdf. Accessed May 8 2017.	Data digitized from plot reported. N=24, 300 mg dose, highly linear pharmacokinetics (AUC) from 0.1 to 300 mg. Average weight 75.6 kg.		1988	321.82	3	0	29.5	4	neutral	3.3	3.3
Clozapine	5786-21-0	CN1CCN(CC1)C2=Nc3cc(Cl)ccc3Nc4ccccc24	1.6	2.5	0.055	11	10	Cheng YF, Lundberg T, Bondesson U, Lindstrom L, and Gabrielsson J (1988) Clinical pharmacokinetics of clozapine in chronic schizophrenic patients. Eur. J. Clin. Pharmacol. 34: 445-449. Schaber G, Stevens I, Gaertner HJ, Dietz K, and Breyer-Pfaff U (1998) Pharmacokinetics of clozapine and its metabolites in psychiatric patients: plasma protein binding and renal clearance. Br. J. Clin. Pharmacol. 4…			1963	326.82	4	1	30.9	1	cationic	4.5	4.1
Cobimetinib	934660-93-2	c1cc(c(cc1I)F)Nc2c(ccc(c2F)F)C(=O)N3CC(C3)([C@@H]4CCCCN4)O	15.4	2.8	0.05	96.6	68.8	Luna Musib, Edna Choo, Yuzhong Deng, Steve Eppler, Isabelle Rooney, Iris T. Chan, and Mark J. Dresser. Absolute Bioavailability and Effect of Formulation Change, Food, or Elevated pH with Rabeprazole on Cobimetinib Absorption in Healthy Subjects. Mol. Pharmaceutics 2013, 10, 4046−4054.//ppb: https://www.accessdata.fda.gov/drugsatfda_docs/label/2015/206192s000lbl.pdf. Accessed May 09, 2017.	70 kg average weight assumed. N=13, 2 mg infusion in 30 minutes.		2007	531.31	5	3	64.6	4	cationic	3.7	3
Cocaethylene	529-38-4	CCOC(=O)[C@H]1[C@H](C[C@@H]2CC[C@H]1N2C)OC(=O)c3ccccc3	1.6	13	0.64	2	1.5	Perez-Reyes M, Jeffcoat AR, Myers M, Sihler K, and Cook CE (1994) Comparison in humans of the potency and pharmacokinetics of intravenously injected cocaethylene and cocaine. Psychopharmacol. 116: 428-432. Bailey DN (1997) Effect of drugs and cocaine metabolites on cocaine and cocaethylene binding to uman serum in vitro. Ther. Drug Monit. 19: 427-430.	Parameters were calculated from C vs t data obtained by digitization of plots in the reference.		1979	317.38	5	0	55.8	6	cationic	3.3	2.4
Cocaine	50-36-2	COC(=O)[C@H]1[C@H](C[C@@H]2CC[C@H]1N2C)OC(=O)c3ccccc3	2	32	0.12	1	0.76	Chow MJ, Ambre JJ, Ruo TI, Atkinson AJ, Bowsher DJ, and Fischman MW (1985) Kinetics of cocaine distribution, elimination, and chronotropic effects. Clin. Pharmacol. Ther. 38: 318-324. Javaid JI, Musa MN, Fischman M, Schuster CR, and Davis JM (1983) Kinetics of cocaine in humans after intravenous and intranasal administration. Biopharm. Drug Dispos. 4: 9-18. Edwards DJ and Bowles SK (1988) Protein…	Paper by Javaid, et al. reported one compartment kinetics so VDss = C0/Dose.		1976	303.35	5	0	55.8	5	cationic	2.8	1.9
Codeine	76-57-3	COc1ccc2C[C@@H]3[C@@H]4C=C[C@H](O)[C@@H]5Oc1c2[C@]45CCN3C	3.5	15	0.7	3.9	4	Guay DRP, Awni WM, Findlay JWA, Halstenson CE, Abraham PA, Opsahl JA, Jones EC, and Matzke GR (1988) Pharmacokinetics and pharmacodynamics of codeine in end-stage renal disease. Clin. Pharmacol. Ther. 43: 63-71. Mohammed SS, Christopher MM, Mehta P, Kedar A, Gross S, and Derendorf H (1993) Increased erythrocyte and protein binding of codeine in patients with sickle cell disease. J. Pharm. Sci. 82…			1970	299.36	4	1	41.9	1	cationic	1.3	0.29
Colchicine	64-86-8	COC1=CC=C2C(=CC1=O)[C@H](CCc3cc(OC)c(OC)c(OC)c23)NC(=O)C	6.1	2.1	0.61	49	58	Ferron GM, Rochdi M, Jusko WJ, and Scherrmann JM (1996) Oral absorption characteristics and pharmacokinetics of colchicine in healthy volunteers after single and multiple doses. J. Clin. Pharmacol. 36: 874-883. Sabouraud A, Chappey O, Dupin T, and Scherrmann JM (1994) Binding of colchicine and thiocolchicoside to human serum proteins and blood cells. Int. J. Clin. Pharmacol. Ther. 32: 429-432.			1971	399.44	7	1	83.1	5	neutral	1.1	1.1
Combretastatin A4 Phosphate	222030-63-9	c1(cc(c(c(c1)OC)OC)OC)/C=C\c1ccc(c(c1)OP(=O)(O)O)OC	0.11	5.86	0.23	0.3	0.47	Afshin Dowlati, Kelly Robertson, Matthew Cooney, William P. Petros, Michael Stratford, John Jesberger, Niusha Rafie, Beth Overmoyer, Vinit Makkar, Bruce Stambler, Anne Taylor, John Waas, Jonathan S. Lewin, Keith R. McCrae and Scot C. Remick. A Phase I Pharmacokinetic and Translational Study of the Novel Vascular Targeting Agent Combretastatin A-4 Phosphate on a Single-Dose Intravenous Schedule in…	70 kg average weight assumed. Data reported across doses and N=25. High variability. MRT from VDss and clearance. ppb: Plasma protein binding characteristics of anti-​tumor drug Combretastatin A4 phosphate in several species. Huaxi Yaoxue Zazhi, 2009, 24, 45-47. From abstract in English. Some variability with concentration but data seemingly tight (0.13-0.29 fu range). Mid-concentration data take…		1989	396.33	8	2	103.7	8	anionic	2.9	-0.95
Conivaptan	210101-16-9	Cc1nc2CCN(C(=O)c3ccc(NC(=O)c4ccccc4c5ccccc5)cc3)c6ccccc6c2[nH]1	0.76	3	0.01	4.2	6.7	Vaprisol Product Label	VDss was calculated using C vs t data obtained by digitization of the plot provided in the product label.		1998	498.57	6	2	78.1	4	cationic	5.5	5
Copanlisib	1032568-63-0	COc1c(ccc2c1N=C(N3C2=NCC3)NC(=O)c4cnc(nc4)N)OCCCN5CCOCC5	10.34	6.42		26.8	25.2	Toshihiko Doi · Nozomu Fuse · Takayuki Yoshino · Takashi Kojima · Hideaki Bando · Hideaki Miyamoto · Masato Kaneko · Motonobu Osada · Atsushi Ohtsu. A Phase I study of intravenous PI3K inhibitor copanlisib in Japanese patients with advanced or refractory solid tumors. Cancer Chemother Pharmacol (2017) 79:89–98	BAY 80-6946. N=7, 1 hr infusion at 0.8 mg/kg dose. Data digitized from plot reported and PK parameters calculated via PKSolver. AUCinf reported 2350 ug.h.L-1; calculated 2073 ng.h.mL-1. 13% difference		2008	480.52	12	2	139.8	8	cationic	0.69	-1.1
Cositecan	203923-89-1	CC[C@@]1(c2cc-3n(c(=O)c2COC1=O)Cc4c3nc5ccccc5c4CC[Si](C)(C)C)O	3.26	4.2		13.33	13.2	Stuart A. Grossman, Kathryn A. Carson, Surasak Phuphanich, Tracy Batchelor, David Peereboom, L. Burt Nabors, Glenn Lesser, Fredrick Hausheer, and Jeffrey G. Supko, for the New Approaches to Brain Tumor Therapy CNS Consortium. Phase I and pharmacokinetic study of karenitecin in patients with recurrent malignant gliomas. Neuro-Oncology 10, 608–616, 2008	Karenitecin. VDss reported as average at 136 L/m2 and clearance as average at 10.2 L/h/m2. N=12. 1.73 m2/70 kg used. MRT from VDss and clearance.		1998	448.59	6	1	81.4	4	neutral	4.5	4.5
Cotinine	486-56-6	CN1[C@@H](CCC1=O)c2cccnc2	1.1	0.89		21	17	Scherer G, Jarczyk L, Heller WD, Biber A, Neurath GB, and Adlkofer F (1988) Pharmacokinetics of nicotine, cotinine, and 3'-hydroxycotinine in cigarette smokers. Klin. Wochenschr. 66(Supp 11): 5-11. Curvall M, Elwin CE, Kazemi-Vala E, Warholm C, and Enzell CR (1990) The pharmacokinetics of cotinine in plasma and saliva from non-smoking healthy volunteers. Eur. J. Clin. Pharmacol. 38: 281-287.	VDss calculated from C vs t data obtained by digitization of the plots provided in the references.		1956	176.22	3	0	33.2	1	neutral	-0.33	-0.33
Coumarin	91-64-5	c12c(ccc(o1)=O)cccc2	1.1	23.6	0.17	0.78	0.8	Pharmacokinetics of coumarin and its 7-hydroxy-metabolites upon intravenous and peroral administration of coumarin in man. Ritschel, W. A.; Brady, M. E.; Tan, H. S. I.; Hoffmann, K. A.; Yiu, I. M.; Grummich, K. W. European Journal of Clinical Pharmacology (1977), 12(6), 457-461. ppb: Loren M. Berry, Chao Li, and Zhiyang Zhao. Species Differences in Distribution and Prediction of Human Vss from Pr…	Vc = Dose/Co reported. VDss = Vc*(1+ k12/k21). MRT = VDss/Cl. 68 kg average weight. N=4 16.78 mg dose.		1884	146.14	2	0	30.5	0	neutral	1.6	1.6
CP-4055	188181-42-2	CCCCCCCC\C=C\CCCCCCCC(=O)OC[C@H]1O[C@H]([C@@H](O)[C@@H]1O)N2C=CC(=NC2=O)N	0.14	4.53		0.51	0.36	Dueland, Svein; Aamdal, Steinar; Lind, Michael J.; Thomas, Hilary; Liland Sandvold, Marit; Gaullier, Jean-Michel;Rasch, Wenche. Intravenous administration of CP-4055 (ELACYT) in patients with solid tumours. A phase I study. Acta Oncol. 2009, 48, 137-145.	ELACYT. Elacytarabine. N=24 across doses from 30 mg/m2 to 240 mg/m2 except 60 mg/m2 which was seemingly showing a much higher clearance and VDss than other infusions with a very high error. Only 30' data infusion taken. The 2 hr infusion at 240 mg/m2 for 2 hrs did not show a significant difference form the 30' infusion at the same dose. 1.73 m2/70kg factor used. MRT from VDss and clearance.		1997	507.66	9	3	134.7	19	neutral	5	5
CP-65207	96865-21-3	C1(N2C(=C(S[C@@H]3C[S@@](CC3)=O)S[C@H]2[C@H]1[C@H](O)C)C([O-])=O)=O	0.21	5.1	0.9	0.7	0.9	Pharmacokinetics of the Penem CP-65,207 and Its Separate Stereoisomers in Humans G. FOULDS,l A. K. KNIRSCH, J. D. LAZAR, T. G. TENSFELDT, AND N. GERBER. Antimicr. Agents Chemother. 1991, 35, 665-671.//ppb: Thomas Gootz, Dennis Girard, William Schelkley, Thomas Tensfeldt, George Foulds, Michael Kellogg, John Stam, Benedict Campbell1f, John Jasys, Paul Kelbaugh, Robert Volkmann and Ernest Hamanaka.…	Na salt. Na omitted from smiles. Average of single enantiomers dosed as racemate and analyzed separately, N=12 each, 1 g 10 min' infusion. Similar values found. Mean weight 74.8 kg.		1985	348.44	6	1	97.7	4	anionic	-1.8	-4.7
CPW 86-363	84080-55-7	Cn1c(nnn1)SCC2=C(N3[C@@H]([C@@H](C3=O)NC(=O)/C(=N/OCC(=O)O)/c4cc[nH]n4)SC2)C(=O)O	0.22	1.83		1.8	1.33	U. GANZINGER, F. SCHATZ, H. HABERL, A. HASLBERGER, H. SCHIEL, G. HiTZENBERGER. Comparative pharmacokinetic analysis of latamoxef and CPW 86-363, a novel carboxy-pyrazol-cephalosporine and formation of N-methyl-thiotetrazole. Int. J. Clin. Pharmacol., Ther. and Toxicol., 1987, 25, 152-156.	N=8, 1 g dose iv bolus, 70 kg median weight reported. T1/2 as 0.693/β		1982	523.5	16	4	217.9	10	anionic	-1.2	-7.5
Crizotinib	877399-52-5	C[C@H](c1c(ccc(c1Cl)F)Cl)Oc2cc(cnc2N)c3cnn(c3)C4CCNCC4	22.15	9.75	0.09	37.9	38.9	Huiping Xu, P, Melissa O’Gorman, Tanya Boutros, Nicoletta Brega, Constantino Kantaridis, Weiwei Tan, Akintunde Bello. Evaluation of Crizotinib Absolute Bioavailability, the Bioequivalence of Three Oral Formulations, and the Effect of Food on Crizotinib Pharmacokinetics in Healthy Subjects. J. Clin. Pharmacol., 2104, 55, 104–113.//ppb: https://www.accessdata.fda.gov/drugsatfda_docs/label/2013/2025…	N=14, 50 mg iv dose, 80 kg average weight reported. MRT from VDss and clearance.		2006	450.34	6	2	78	5	cationic	4.3	2.3
CUDC-101	1012054-59-9	COc1cc2c(cc1OCCCCCCC(=O)NO)c(ncn2)Nc3cccc(c3)C#C	0.56	11.99		0.78	5.01	Toshio Shimizu, Patricia M. LoRusso, Kyri P. Papadopoulos, Amita Patnaik, Muralidhar Beeram, Lon S. Smith, Drew W. Rasco, Theresa A. Mays, Glenda Chambers, Anna Ma, Jing Wang, Robert Laliberte, Maurizio Voi, Anthony W. Tolcher. Phase I First-in-Human Study of CUDC-101, a Multitargeted Inhibitor of HDACs, EGFR, and HER2 in Patients with Advanced Solid Tumors. Clin. Cancer Res. 2014, 20, 5032–5040.	1hr infusion. Weighted average of 24 patients acrosss five doses (75-300 mg/m2), average weight assumed to be 70 kg. All data from table 5. MRT from VDss and clearance.		2008	434.49	8	3	105.6	12	neutral	4.3	4.3
Cyanamide	420-04-2	C(N)#N	0.78	17		0.8	0.43	R. OBACH, J. TORRENT, H. COLOM, J. PRUGONOSA, C. PERAIRE AND J. DOMENECH. PHARMACOKINETICS AND ORAL BIOAVAILABILITY OF CARBIMIDE IN MAN. BIOPHARMACEUTICS & DRUG DISPOSITION, VOL. 12, 425434 (1991)	CARBIMIDE. Clearance a bit variable but within good agreement. N=16 in 4 groups receiving 0.1, 0.3, 0.6, 1.0 mg/kg. Data taken as average of all groups. MRT from VDss and clearance.		1886	42.04	2	1	49.8	0	cationic	-0.82	-0.82
Cyclizine	82-92-8	CN1CCN(CC1)C(c2ccccc2)c3ccccc3	16.5	14.5		15.46	13.53	R.B. Walker , I. Kanfer. Pharmacokinetics of cyclizine following intravenous administration to human volunteers. Eur. J. Pharm. Sci. 1996, 4, 301-306.	Nautazine. Marezine. N=6, 83 kg as median weight. 25 mg bolus dose.		1949	266.38	2	0	6.5	3	cationic	3.2	2.4
Cyclopentenyl cytosine	90597-22-1	c1cn(c(=O)nc1N)[C@@H]2C=C([C@H]([C@H]2O)O)CO		3.61				Pedro M. Politi , Fuming Xie , William Dahut, Harry Ford, Jr. , James A. Kelley , Anne Bastian, Ann Setser , Carmen J. Allegra , Alice P. Chert, J. Michael Hamilton , Susan F. Arbuck, Peter Linz , Harry Brammer , Jean L. Grem. Phase I clinical trial of continuous infusion cyclopentenyl cytosine. Cancer Chemother Pharmacol (1995) 36:513 523.	Infusion plot with N=1 available. Clearance reported as 146 mL/min/m2. 1.73 m2/70 kg conversion factor used.		1983	239.23	7	4	121.6	2	neutral	-2.9	-2.9
Cyclophosphamide	50-18-0	ClCCN(CCCl)P1(=O)NCCCO1	0.73	1.1	0.87	11	8	Juma FD, Rogers HJ, and Trounce JR (1979) Pharmacokinetics of cyclophosphamide and alkylating activity in man after intravenous and oral administration. Br. J. Clin. Pharmacol. 8: 209-217. Juma FD, Rogers HJ, and Trounce JR (1979) The kinetics of salivary elimination of cyclophosphamide in man. Br. J. Clin. Pharmacol. 8: 455-458.	VDss calculated from microconstants reported in the reference.		1946	261.09	4	1	41.6	5	neutral	0.79	0.55
Cyclosporine	59865-13-3	CC[C@@H]1NC(=O)[C@H]([C@H](O)[C@H](C)C\C=C\C)N(C)C(=O)[C@H](C(C)C)N(C)C(=O)[C@H](CC(C)C)N(C)C(=O)[C@@H](CC(C)C)N(C)C(=O)[C@@H](C)NC(=O)[C@H](C)NC(=O)[C@H](CC(C)C)N(C)C(=O)[C@@H](NC(=O)[C@H](CC(C)C)N(C)C(=O)CN(C)C1=O)C(C)C	3.3	7.5	0.068	7.3	7.3	Legg B, Gupta SK, Rowland M, Johnson RWG, and Solomon LR (1988) Cyclosporin: pharmacokinetics and detailed studies of plasma and erythrocyte binding during intravenous and oral administration. Eur. J. Clin. Pharmacol. 34: 451-460. Min DI, Lee M, Ku YM, and Flanigan M (2000) Gender-dependent racial difference in disposition of cyclosporine among healthy African American and white volunteers. Clin.…	Reported whole blood parameters converted to plasma parameters using a blood/plasma ratio of 1.3.		1974	1202.61	23	5	278.8	15	neutral	6.6	6.6
CYT997	917111-44-5	O(C)C(C=C(C1)C(N=C(N[C@@H](CCC)C2C=CC=NC=2)C2C)=NC=2)=C(NC(NCC)=O)C=1	3.41	22.2		2.5	2.9	Phase I trial of CYT997, a novel cytotoxic and vascular-disrupting agent. Lickliter, J. D.; Francesconi, A. B.; Smith, G.; Burge, M.; Coulthard, A.; Rose, S.; Griffin, M.; Milne, R.; McCarron, J.; Yeadon, T.; et al. British Journal of Cancer (2010), 103(5), 597-606	Lexibulin. Data digitized from plot reported, 269 mg/m2 dose and converted using 1.73 m2/70 kg factor. N=4. 24 hour infusion. Good agreement (9%) with reported AUC-last.		2005	434.53	8	3	101.1	9	neutral	4.3	4.3
Cytarabine	147-94-4	[H]N([H])C1C=CN(C(N=1)=O)[C@H]1[C@H]([C@@H]([C@@H](CO[H])O1)O[H])O[H]	0.67	41.67	0.87	0.28	0.17	Breithaupt H et al., Clinical results and pharmacokinetics of high-​dose cytosine arabinoside (HD ARA-​C). Cancer, 1982, 50, 1248-1257. ppb: Van Prooijen, H. C.; Vierwinden, G.; Wessels, J.; Haanen, C. Cytosine arabinoside binding to human plasma proteins. Arch. Int. Pharmacodyn. Ther. 1977, 229, 199-205.	MK 8242. Tarabine. AC-1075. Data from 1-12 g doses with 2-3.5 hours iv infusion N=5 (see table 2 and 4) (Ara-C)		1966	243.22	8	4	128.6	6	neutral	-3	-3
Dabigatran	211914-51-1	[H]N=C(c1ccc(cc1)N([H])Cc1nc2cc(ccc2n1C)C(N(CCC(=O)O[H])c1ccccn1)=O)N([H])[H]	0.85	1.93	0.65	7.4	7.3	Blech S, Ebner T, Ludwig-Schwellinger E, et al. The Metabolism and Disposition of the Oral Direct Thrombin Inhibitor, Dabigatran, in Humans. Drug Metabol Disp 2008, 36, 386-399.	N=5, 5 mg dose iv bolus, average weight 80.2 kg. See notes from e-mail reply from Dr. Blech. Free means "unconjugated" not "unbound". Cl 155 mL/min, and VDss 68.6 L.		1998	471.51	10	4	150.2	11	zwitterionic	0.25	-1.1
Dabrafenib	1195765-45-7	CC(C)(C)c1nc(c2cccc(NS(=O)(=O)c3c(F)cccc3F)c2F)c(s1)c4ccnc(N)n4	0.65	2.86	0.003	3.8	2.6	Denton CL, Minthorn E, Carson SW, Young GC, Richards-Peterson LE, Botbyl J, Han C, Morrison RA, Blackman SC, Ouellet D. Concomitant Oral and Intravenous Pharmacokinetics of Dabrafenib, a BRAF Inhibitor, in Patients With BRAF V600 Mutation‐Positive Solid Tumors. J. Clin. Pharmacol. 2013, 53, 955-961.//ppb reported in PDR as 99.7%. https://www.pdr3d.com/detail.php?c=167028#section-13. Accessed Augu…	N= 4. 70 kg average weight used. 50 ug iv of 14C-dabrafenib concomitant with 150 mg po. MRT from VDss and clearance. Animal data availble in 4 species (mouse, rat, dog and monkey).		2009	519.56	7	2	110.9	5	neutral	5.3	5.2
Dacarbazine	4342-03-4	CN(C)N=Nc1nc[nH]c1C(=O)N	1.2	2.6	1	7.8	6.2	Loo TL, Housholder GE, Gerulath AH, Saunders PH, and Farquhar D (1976) Mechanism of action and pharmacology studies with DITC (NSC-45388) Canc. Treatment Rep. 60: 149-152. DITC-DOME Product Label	Parameters calculated from C vs t data obtained by digitization of a plot provided in the reference.		1953	182.18	7	2	99.7	3	neutral	-0.12	-0.12
Dacinostat	404951-53-7	c1ccc2c(c1)c(c[nH]2)CCN(CCO)Cc3ccc(cc3)/C=C/C(=O)NO	2.17	7.6	0.23	4.78	12.43	Johann S. de Bono, Rebecca Kristeleit, Anthony Tolcher, Peter Fong, Simon Pacey, Vasilios Karavasilis,Monica Mita, Heather Shaw, Paul Workman, Stan Kaye, Eric K. Rowinsky, WynneAherne, Peter Atadja, Jeffrey W. Scott, and Amita Patnaik. Phase I Pharmacokinetic and Pharmacodynamic Study of LAQ824, a Hydroxamate Histone Deacetylase Inhibitor w itha Heat Shock Protein-90 Inhibitory Profile, in Patien…	NVP-LAQ824 Digitized from plot at 72 and 6 mg/m2 and then weight-averaged (n=13 at 72 mg/m2 and 3 at 6 mg/kg). Good agreement with AUCinf reported. 1.73m2/70 kg conversion factor used.		2003	379.45	6	4	88.6	9	cationic	1.8	1.5
Daclatasvir	1009119-64-5	COC(=O)N[C@@H](C(C)C)C(=O)N1CCC[C@H]1c2ncc([nH]2)c3ccc(cc3)c4ccc(cc4)c5cnc([nH]5)[C@@H]6CCCN6C(=O)[C@@H](NC(=O)OC)C(C)C	0.67	1	0.01	11.19	13.5	DAKLINZA. PDR prescribing information. http://pdr3d.com/detail.php?c=159566#section-12. Accessed October 16 2015.	70 kg assumed. iv tracer plus 60 mg dose. PDR: With multiple dosing, protein binding of daclatasvir in HCV-infected subjects was approximately 99% and independent of dose at the dose range studied (1-100 mg). In subjects who received daclatasvir 60 mg tablet orally followed by 100 μg [13C,15N]-daclatasvir intravenous dose, estimated volume of distribution at steady state was 47 L. Following multi…		2008	738.88	14	4	174.6	13	neutral	5.3	5.2
Dalbavancin	171500-79-1	CN[C@H]1C(=O)N[C@@H]2Cc3ccc(Oc4cc5cc(Oc6ccc(cc6Cl)[C@@H](O)[C@@H]7NC(=O)[C@H](NC(=O)[C@@H]5NC(=O)[C@@H](NC2=O)c8cc(Oc9cc1ccc9O)cc(O)c8Cl)c%10ccc(O)c(c%10)c%11c(O[C@H]%12O[C@H](CO)[C@@H](O)[C@H](O)[C@@H]%12O)cc(O)cc%11[C@H](NC7=O)C(=O)NCCCN(C)C)c4O[C@@H]%13O[C@@H]([C@@H](O)[C@H](O)[C@H]%13NC(=O)CCCCCCCCC(C)C)C(=O)O)cc3	0.14	0.01	0.02	230	170	Leighton A, Gottlieb AB, Dorr MB, Jabes D, Mosconi G, VanSaders C, Mroszczak EJ, Campbell KCM, and Kelly E (2004) Tolerability, pharmacokinetics, and serum bactericidal activity of intravenous dalbavancin in healthy volunteers. Antimic. Agents Chemother. 48: 940-945. Jabés D, Candiani G, Romanó G, Brunati C, Riva S, and Cavaleri M (2004) Efficacy of Dalbavancin against Methicillin-Resistant Staph…			1995	1816.69	38	21	572.5	22	zwitterionic	4.3	0.73
Dalfampridine	504-24-5	c1(ccncc1)N	2.6	9.3	1	4.7	3.6	Donald R. A. Uges, Pharm.D., Yung Jai Sohn, M.D.,* Ben Greijdanus,Arnold H. J. Scat, Ph.D., Sandor Agoston, M.D., Ph.D. 4-Aminopyridine kinetics. Clin. Pharmacol. Ther. 1982, 31, 587-593.	4-aminopyridine. N=9 (7M and 2F). 71.6 kg average weight, 20 mg dose.	Donald R. A. Uges, Pharm.D., Yung Jai Sohn, M.D.,* Ben Greijdanus,Arnold H. J. Scat, Ph.D., Sandor Agoston, M.D., Ph.D. 4-Aminopyridine kinetics. Clin. Pharmacol. Ther. 1982, 31, 587-593. Approximately 90% excreted unchanged in urine.	1915	94.11	2	1	38.9	0	cationic	-0.12	-1.4
Dalfopristin	112362-50-2	CCN(CC)CCS(=O)(=O)[C@@H]1CCN2[C@H]1C(=O)O[C@@H](C(C)C)[C@H](C)\C=C\C(=O)NC\C=C/C(=C/[C@@H](O)CC(=O)Cc3occ(n3)C2=O)/C	0.39	16	0.82	0.41	0.74	Chevalier P, Rey J, Pasquier O, Rouzier-Panis R, Harding N, and Montay G (2001) Multiple-dose pharmacokinetics and safety of two regimens of quinupristine/dalfopristin (Synercid) in healthy volunteers. J. Clin. Pharmacol. 41: 404-414. Bergeron M and Montay G (1997) The pharmacokinetics of quinupristin/dalfopristin in laboratory animals and in humans. J. Antimic. Chemother. 39(Supp. 1): 129-138. B…			1986	690.85	13	2	176.7	7	neutral	0.6	0.6
Danazol	17230-88-5	C[C@]12CC[C@H]3[C@H]([C@@H]1CC[C@]2(C#C)O)CCC4=Cc5c(cno5)C[C@]34C	5.18	15.71		5.49	2.31	Sunesen VH, Vedelsdal R, Kristensen HG, Christrup L, Müllertz A. Effect of liquid volume and food intake on the absolute bioavailability of danazol, a poorly soluble drug. Eur J Pharm Sci. 2005 24, 297-303.	N=8, 50 mg iv dosed as 30' infusion. 86 kg average weight reported. Data digitized and PK parameters calculated via Phoenix v. 6.4.0.768. AUCinf very close to AUCt. AUC(not specified) reported as 531 ng.h.mL-1; calculated AUCinf as 616.7 ng.h.mL-1. 16% error.		1963	337.46	3	1	46.6	1	neutral	3.7	3.7
Danoprevir	850876-88-9	CC(C)(C)OC(=O)N[C@H]1CCCCC\C=C/[C@@H]2C[C@]2(NC(=O)[C@@H]3C[C@H](CN3C1=O)OC(=O)N4Cc5cccc(F)c5C4)C(=O)NS(=O)(=O)C6CC6	0.22	11.53	0.02	0.32	1.81	Barbara J. Brennan, Agne`s Poirier, Sebastian Moreira, Peter N. Morcos, Petra Goelzer, Rene´e Portmann, Jiney Asthappan, Christoph Funk, Patrick F. Smith.Characterization of the Transmembrane Transport and Absolute Bioavailability of the HCV Protease Inhibitor Danoprevir. Clin. Pharmacokin. 2015, 54, 237-249.//ppb: Gane EJ, Rouzier R, Stedman C, Wiercinska-Drapalo A, Horban A, Chang L, Zhang Y, S…	RO5190591. R 7227. N=12, 70 kg average weight assumed, 6 mg dose as 1 h infusion. Data digitized and PK parameters calculated via PKSolver. Reported AUC(0-inf) 122 ng.h.m-1; calculated 123. 9 ng.h.m-1. 1% difference.	Very low BA (1.15%) from iv and 100 mg po dose.	2005	731.83	14	3	180.5	7	anionic	4.4	1.4
Dantrolene	7261-97-4	O=C1CN(\N=C\c2oc(cc2)c3ccc(cc3)N(=O)=O)C(=O)N1	0.37	0.43		14	10	Podranski T, Boullion T, Schumacher PM, Taguchi A, Sessler DI, and Kurz A (2005) Compartmental pharmacokinetics of dantrolene in adults: do malignant hyperthermia association dosing guidelines work? Anesth. Analg. 101: 1695-1699.			1967	314.25	9	1	121	4	anionic	1.4	1
Danusertib	827318-97-8	N(C(=O)C(=CC=C1N(CCN2C)CC2)C=C1)C(C(=C1C2)CN2C([C@H](OC)C(=CC=C2)C=C2)=O)=NN1	2.5	6.1		6.8	25	Weighted data digitized from Fig. 1B (N=12, dose 500 mg/m2 (12.5 mg/kg) 24h i.v. infusion) and Fig. 1C (N=6, dose 750 mg/m2 (18.75 mg/kg) 24h i.v. infusion) in Cohen, Roger B.; Jones, Suzanne F.; Aggarwal, Charu; von Mehren, Margaret; Cheng, Jonathan; Spigel, David R.; Greco, F. Anthony; Mariani, Mariangela; Rocchetti, Maurizio; Ceruti, Roberta; Comis, Silvia; Laffranchi, Bernard; Moll, Jurgen; B…	The Fig. 4 is not plotted in van Tellingen O. et al, Cancer Chemother Pharmacol, 1998, 41, 377-384 where another patient profile with a different dose is shown in the Fig. 5		2005	474.55	9	2	93.8	6	cationic	1.6	0.62
Dapagliflozin	461432-26-8	[C@H]1([C@H]([C@@H]([C@H](C(O1)c1ccc(c(c1)Cc1ccc(cc1)OCC)Cl)O)O)O)CO	1.7	3	0.09	9.5	12.2	Simultaneous oral therapeutic and intravenous 14C-microdoses to determine the absolute oral bioavailability of saxagliptin and dapagliflozin Boulton, David W.; Kasichayanula, Sreeneeranj; Keung, Chi Fung; Arnold, Mark E.; Christopher, Lisa J.; Xu, Xiaohui; LaCreta, Frank British Journal of Clinical Pharmacology (2013), 75(3), 763-768.	80 ug labelled iv dose given at Tmax of a po pharmacological dose (5mg). N=7 and 70 kg average weight assumed.MRT from Cl and Vss.	In Vitro Characterization and Pharmacokinetics of Dapagliflozin (BMS-512148), a Potent Sodium-Glucose Cotransporter Type II Inhibitor, in Animals and Humans. S M. Obermeier, M. Yao, A. Khanna, B. Koplowitz, M. Zhu, W. Li, B. Komoroski, S. Kasichayanula, L. Discenza, W. Washburn, W. Meng, B. A. Ellsworth, J. M. Whaley, and W. G. Humphreys. Drug Metab. Disp. 38:405–414, 2010. Likely to be glucuroni…	2002	408.87	6	4	99.4	6	neutral	2.3	2.3
Dapsone	80-08-0	Nc1ccc(cc1)S(=O)(=O)c2ccc(N)cc2	0.83	0.48	0.25	29	22	Pieters FAMJ and Zuidema J (1987) The absolute bioavailability of dapsone in dogs and humans. Int. J. Clin. Pharmacol. Ther. Toxicol. 25: 396-400. Biggs JT and Levy L (1971) Binding of dapsone and monacetyldapsone by human plasma proteins. Proc. Soc. Exp. Biol. Med. 137: 692-695.	VDss calculated from C vs t data obtained by digitization of plot provided in the reference.		1908	248.3	4	2	86.2	2	neutral	0.97	0.97
Daptomycin	103060-53-3	CCCCCCCCCC(=O)N[C@@H](Cc1c[nH]c2ccccc12)C(=O)N[C@H](CC(=O)N)C(=O)N[C@@H](CC(=O)O)C(=O)N[C@H]3[C@@H](C)OC(=O)[C@H](CC(=O)c4ccccc4N)NC(=O)[C@@H](NC(=O)[C@@H](CO)NC(=O)CNC(=O)[C@H](CC(=O)O)NC(=O)[C@@H](C)NC(=O)C(CC(=O)O)NC(=O)[C@H](CCCN)NC(=O)CNC3=O)[C@H](C)CC(=O)O	0.088	0.16	0.083	9.2	8.1	Dvorchik BH, Brazier D, DeBruin MF, and Arbeit RD (2003) Daptomycin pharmacokinetics and safety following administration of escalating doses once daily to healthy subjects. Antimic. Agents Chemother. 47: 1318-1323. Woodworth JR, Nyhart EH, Brier GL, Wolny JD, and Black HR (1992) Single dose pharmacokinetics and antibacterial activity of daptomycin, a new lipopeptide antibiotic, in healthy volunte…	VDss calculated from C vs t data obtained by digitization of plot provided in the Benvenuto, et al. references.		1986	1620.67	43	22	702	35	anionic	-6.4	-9
Darapladib	356057-34-6	c1(ccc(cc1)CSc1nc(=O)c2c(n1CC(=O)N(CCN(CC)CC)Cc1ccc(cc1)c1ccc(cc1)C(F)(F)F)CCC2)F	11.9	4.11		48.1	40.9	Mehul Dave, Mike Nash, Graeme C. Young, Harma Ellens, Mindy H. Magee, Andrew D. Roberts, Maxine A. Taylor, Robert W. Greenhill, and Gary W. Boyle. Disposition and Metabolism of Darapladib, a Lipoprotein-Associated Phospholipase A2 Inhibitor, in Humans. Drug Metab Dispos 2014, 42:415–430.	SB-480848. 70 kg average weight assumed. 8 mg dose over 3 hours infusion. N=8. MRT from VDss and clearance.		2001	666.77	6	0	58.4	13	cationic	6.5	5.1
Darifenacin	133099-04-4	NC(=O)C([C@@H]1CCN(CCc2ccc3OCCc3c2)C1)(c4ccccc4)c5ccccc5	2.6	12	0.02	3.6	3.6	Skerjanec A (2006) The clinical pharmacokinetics of darifenacin. Clin. Pharmacokinet. 45: 325-350. Enablex Product Label.	Pharmacokinetic parameters were calculated from C vs t data obtained by digitization of the plot provided in the reference.		1990	426.55	4	1	55.6	7	cationic	3.8	2.5
Darunavir	206361-99-1	CC(C)CN(C[C@H]([C@H](Cc1ccccc1)NC(=O)O[C@H]2CO[C@@H]3[C@H]2CCO3)O)S(=O)(=O)c4ccc(cc4)N		7.81	0.05		15	PDR. Accessed February 20 2013. http://www.pdr3d.com/detail.php?c=80691#section-13	No VDss reported. Clearance 32.8 L/h (iv). 70 kg assumed.	PDR. Accessed February 20 2013. http://www.pdr3d.com/detail.php?c=80691#section-13. After intravenous administration, the clearance of darunavir, administered alone and co-administered with 100 mg twice daily ritonavir, was 32.8 L/h and 5.9 L/h, respectively. Assigned to be metabolic on the basis of this observation.	1995	547.66	10	3	140.4	12	neutral	2.8	2.8
Dasabuvir	1132935-63-7	CC(C)(C)c1cc(cc(c1OC)c2ccc3cc(ccc3c2)NS(=O)(=O)C)n4ccc(=O)[nH]c4=O	2.13		0.005		5.7	PDR http://www.pdr3d.com/detail.php?c=186040#section-12. Accessed August 9 2016. Table 6.	No iv AUC or clearance. Protein binding reported > 99.5. Median t1/2 taken and 70 kg average weight assumed.		2009	493.57	8	2	110.3	5	neutral	4.3	0.75
Daunorubicin	20830-81-3	C[C@H]1[C@H]([C@H](C[C@@H](O1)O[C@H]2C[C@@](Cc3c2c(c4c(c3O)C(=O)c5cccc(c5C4=O)OC)O)(C(=O)C)O)N)O	32.05	47.57	0.06	11.23	14.24	Aquilur Rahman, Anita Goodman, Wayne Foo, Jimmie Harvey, Frederick P. Smith, and Philip S. Schein. Clinical Pharmacology of Daunorubidn in Phase I Patients With Solid Tumors: Development of an Analytical Methodology for Daunorubicin and Its Metabolites. Sem. Oncol., 1984, 11, 36-44.//ppb: Gillian Whitaker, Amy Lillquist, Stephanie A. Pasas, Robert O'Connor, Fiona Regan,Craig E. Lunte, Malcolm R. …	30 to 60 mg/m2 to patients with with normal hepatic and renal function. 1.73 m2/70kg conversion factor used. N not reported. MRT from clearance and VDss.		1953	527.52	11	5	185.8	4	cationic	1	-1.6
Deacetyl metipranolol	57193-14-3	c1(c(c(c(cc1C)OC[C@@H](CNC(C)C)O)C)C)O	3.6	16.2		3.7	3.1	U. Abshagen, G. Betzien, B. Kaufmann, G. Endele. Pharmacokinetics of Metipranolol in normal man. Eur. J. Clin. Pharmacol, 1982, 21, 293-301.	Data digitized from 20 mg PK profile in figure 3 in . N=10, 20 mg dose, 0.8 h infusion, 78 kg. Reported AUC 283 hr*ug/L t1/2 = 2.91 h Clearance = 20.3 mL/sec (= 15.6 mL/min/kg)	very low renal clearance (12%)	1974	267.36	4	3	61.7	6	cationic	2.6	0.77
Decitabine	2353-33-5	NC1=NC(=O)N(C=N1)[C@H]2C[C@H](O)[C@@H](CO)O2	4.6	130	1	0.59	0.58	van Groeningen CJ, Leyva A, O'Brien AMP, Gall HE, and Pinedo HM (1986) Phase I and pharmacokinetic study of 5-aza-2'-deoxycytidine (NSC 127716) in cancer patients. Cancer Res. 46: 4831-4836. Dacogen Product Label.	NSC 127716		1964	228.21	8	3	120.7	2	neutral	-2	-2
Deferasirox	201530-41-8	[H]OC(c1ccc(cc1)n1c(c2ccccc2O[H])nc(c2ccccc2O[H])n1)=O	0.2	0.84	0.004	4.07	4.05	Sechaud R et al. Absolute oral bioavailability and disposition of deferasirox in healthy human subjects. J. Clin. Pharmacol. 2008, 48, 919-925. ppb: H. Markus Weiss, Marcel Fresneau, Gian P. Camenisch, Olivier Kretz, and Gerhard Gross, IN VITRO BLOOD DISTRIBUTION AND PLASMA PROTEIN BINDING OF THE IRON CHELATOR DEFERASIROX (ICL670) AND ITS IRON COMPLEX FE-[ICL670]2 FOR RAT, MARMOSET, RABBIT, MOUSE…	N=17, 70-kg average weight assumed, 130 mg dose as 90 minutes infusion.		1997	373.36	7	3	108.5	7	anionic	4.5	1.3
Deferolimus	572924-54-0	C1CCN2[C@@H](C1)C(=O)O[C@@H](CC(=O)[C@@H](C=C([C@H]([C@H](C(=O)[C@@H](C[C@@H](C=CC=CC=C([C@H](C[C@@H]1CC[C@H]([C@](C(=O)C2=O)(O1)O)C)OC)C)C)C)OC)O)C)C)[C@H](C)C[C@@H]1CC[C@H]([C@@H](C1)OC)OP(=O)(C)C	3.2	1.1		48.5	46.3	Hartford CM et al. A Phase I trial to determine the safety, tolerability, and maximum tolerated dose of deferolimus in patients with advanced malignancies. Clin. Cancer Res. 2009, 15, 1428-1434.	Ridaforolimus, MK 8669, AP23573. 82 kg median weight, weight-averaged across 41 patients and 6 doses. Average VDss 261 L, average clearance 5.34 L/h. NOT a sirolimus prodrug.		2003	990.21	15	2	201.5	8	neutral	6.4	6.4
Degarelix	214766-78-6	c1(cc2ccccc2cc1)C[C@H](C(N[C@@H](C(N[C@@H](C(N[C@@H](CO)C(N[C@H](C(N[C@@H](C(N[C@H](C(N[C@H](C(N1[C@@H](C(N[C@@H](C(N)=O)C)=O)CCC1)=O)CCCCNC(C)C)=O)CC(C)C)=O)Cc1ccc(cc1)NC(N)=O)=O)Cc1ccc(cc1)NC([C@H]1CC(NC(N1)=O)=O)=O)=O)=O)Cc1cnccc1)=O)Cc1ccc(cc1)Cl)=O)NC(C)=O	0.74	0.68	0.1	18.1	18.6	Australian Public Assessment Report for Degarelix. Therapeutic Goods Administration , Department of Health and Ageing, Australian Goverment Health Safety Regulation (May 2010) (AusPAR Firmagon Degarelix Ferring Pharmaceuticals Pty Ltd PM-2008-2254-4 Date of Finalisation 16 February 2010)	Doses: IV degarelix infusions of 3.7 (n=6), 9.87 (n=6), 24.7 (n=9), and 49.4 (n=9) µg/kg All data are taken as the median of the min and max values of the reported short range. VDss (L/kg) = 0.74 (range 0.65-0.82) CL (mL/min/kg) = 0.68 (range 0.58 - 0.78) MRT (h) = 18.1 (calculated from averaged VDss and CL) t1/2 = 18.6 (range 13.6 - 23.7) plasma fraction unbound (ex vivo) = 0.1 PPB: Plasma prote…		1998	1632.26	34	17	512.9	41	cationic	2.9	0.72
Dehydroandrographolide succinate	786593-06-4	O=C(O)CCC(=O)O[C@@H]3CC[C@@]2(C)[C@H](/C=C/C1=CCOC1=O)C(=C)CC[C@@H]2[C@]3(C)COC(=O)CCC(=O)O	0.13	2		1	1.9	Shuijun Li , DingYang, MengqiZhang, JuzhenZhou, RuiLi , ChuanLua, YunLiua YanmeiLiua Yiping Wang, ChenYua. Determination of dehydroandrographolide succinate in humanplasma by liquid chromatography tandem mass spectrometry(LC–MS/MS): Method development validation and clinical pharmacokinetic study. Journal of Chromatography B, 878 (2010) 2274–2279.	Data digitized from mean plasma vs. time concentratrion profile in Fig. 5 (N=9). 1h-indfused dose of 160 mg corrected as free acid. 70 kg body weight assumed. MRT calculated from VDss and CL. T1/2 reported of 1.8h		2004	532.58	10	2	153.5	13	anionic	2	-3.7
Delafloxacin	189279-58-1	c1c2c(c(c(c1F)N3CC(C3)O)Cl)n(cc(c2=O)C(=O)O)c4c(cc(c(n4)N)F)F	0.35	2.33	0.16	2.5	2.1	Randall Hoover; Thomas Hunt; Michael Benedict; Susan K. Paulson; Laura Lawrence; Sue Cammarata and Eugene Sun. Safety, Tolerability,and Pharmacokinetic Properties of Intravenous Delafloxacin After Single and Multiple Dosesin Healthy Volunteers. Clin. Ther. 2016, 38, 53-65. // ppb: https://www.accessdata.fda.gov/drugsatfda_docs/label/2017/208610s000,208611s000lbl.pdf.	Data digitized from plot reported at 750 mg dose, 1-hr iv infusion, N=8, 73.8 kg as average weight reported across entire cohort. T1/2 taken as very long in report but concentration at < 2% of Cmax after 12 hours. Extrapolation using 3-12 hr interval (5 points). AUCinf reported 74.4 ug.hr.mL-1 and calculated as 72.2 ug.hr.mL-1 (3% deviation). Clearance not linear across entire range and a mid poi…		1997	440.76	8	3	121.7	3	anionic	2.5	-0.0083
Delorazepam (Chlordesmethyldiazepam)	2894-67-9	Clc1ccc2NC(=O)CN=C(c3ccccc3Cl)c2c1	2.2	0.17	0.051	220	200	Bareggi SR, Pirola R, Potvin P, and Devis G (1995) Effects of liver disease on the pharmacokinetics of intravenous and oral chlordesmethyldiazepam. Eur. J. Clin. Pharmacol. 48: 265-268. Sennesael J, Verbeelen D, Vanhaelst L, Pirola R, and Bareggi SR (1991) Pharmacokinetics of intravenous and oral chlordesmethyldiazepam in patients on regular haemodialysis. Eur. J. Clin. Pharmacol. 41:65-68. Lucek…	Parameters were determined from C vs t data obtained by digitization of the C vs t plots for normal subjects provided in the references and averaged (N=2).		1962	305.16	3	1	41.5	1	neutral	3.6	3.6
Demethylchlortetracycline	127-33-3	CN(C)[C@H]1[C@@H]2C[C@@H]3[C@H](O)c4c(Cl)ccc(O)c4C(=O)C3=C(O)[C@]2(O)C(=O)C(=C1O)C(=O)N	1.3	1.1	0.59	17	12	Kunin, CM, Darnbush AC, and Finland M. Distribution and excretion of four tetracycline analogs in normal young men. J. Clin. Invest. 1959, 38, 1950-63.	Calculated from digitized plots		1957	464.85	10	6	181.6	2	anionic	-0.19	-2.9
Denaverine	3579-62-2	CCC(CC)COC(C(=O)OCCN(C)C)(c1ccccc1)c2ccccc2	7.1	5.7		21	34	Staab A, Schug BS, Larsimont V, Elze M, Thummler D, Mutschler E, and Blume H (2003) Pharmacokinetics and bioavailability of denaverine hydrochloride in healthy subjects following intravenous, oral, and rectal single doses. Eur. J. Pharm. Sci. 18: 121-128.			1963	383.52	4	0	38.8	12	cationic	5.3	4.3
Deoxycytidine-5F-2'	10356-76-0	c1c(c(nc(=O)n1[C@H]2C[C@@H]([C@H](O2)CO)O)N)F	0.91	5.09		2.98	0.78	Edward M. Newman · Robert J. Morgan · Shivaani Kummar · Jan H. Beumer · M. Suzette Blanchard · Christopher Ruel · Anthony B. El‑Khoueiry · Mary I. Carroll · Jessie M. Hou · Chun Li · Heinz J. Lenz · Julie L. Eiseman · James H. Doroshow. A phase I, pharmacokinetic, and pharmacodynamic evaluation of the DNA methyltransferase inhibitor 5‑fluoro‑2′‑deoxycytidine, administered with tetrahydrouridine. …	Data weight-averaged across 3 doses (67, 100 and 133 mg/m2, N= 7, 16, and 6, respectively) 3 hr iv infusion, administered with 350 mg/m2 of tetrahydrouridine. 1.73 m2/70 kg conversion factor assumed. MRT from VDss and clearance.		1959	245.21	7	3	110.6	2	neutral	-2	-2
Deramciclane	120444-71-5	C[C@@]12CC[C@@H](C1(C)C)C[C@@]2(c3ccccc3)OCCN(C)C	7.7	4.88	0.05	26.6	26.6	Risto Huupponen, Outi Paija, Markku Salonen, Harry Bjorklund, Juha Rouru, Markku Anttila. Pharmacokinetics of Deramciclane, a Novel Anxiolytic Agent, after Intravenous and Oral Administration. Drugs R&D 2003; 4 (6): 339-345. //ppb: J . VISY, I. FITOS, G. MADY, M . SIMONYI AND I. KLEBOVICH. Plasma Protein Binding of Deramciclane in Different Species. Pharm. Sci. 1996, 2, 315-318.	N=12, 30 mg dose. All data from table I. Same t1/2 and MRT reported. //ppb: value dependent on concentration fu 1.8% at 0.9 uM and 7.5% at 200 uM. Median value taken.		1992	301.47	2	0	12.5	5	cationic	4	2.6
Desacetylpaclitaxel, 4-; 4-methyl carbonate	172481-83-3	COC(=O)O[C@@]12CO[C@@H]1C[C@H](O)[C@]3(C)[C@@H]2[C@H](OC(=O)c4ccccc4)[C@]5(O)C[C@H](OC(=O)[C@H](O)[C@@H](NC(=O)c6ccccc6)c7ccccc7)C(=C([C@@H](OC(=O)C)C3=O)C5(C)C)C	6.9	8.6		13	31	du Bois A, Jung B, Loehr A, Schaller-Kranz T, Cohen M, Frickhofen N (2006) A phase I and pharmacokinetic study of novel taxane BMS-188797 and cisplatin in patients with advanced solid tumours. Br. J. Cancer. 94: 79-84.	BMS-188797		1995	869.91	16	4	230.5	15	neutral	2.3	2.3
Desferrioxamine	70-51-9	C(CCC(NCCCCCN(C(C)=O)O)=O)(N(CCCCCNC(CCC(N(CCCCCN)O)=O)=O)O)=O	1.35	8.33		2.7	3.05	P. LEE, N. MOHAMMED, L. MARSHALL, A. D. ABEYSINGHE, A. C. HIDER, J. B. PORTER, AND S. SINGH. INTRAVENOUS INFUSION PHARMACOKINETICS OF DESFERRIOXAMINE IN THALASSAEMIC PATIENTS. Drug Metab. Disp. 1993, 21, 640-644.	Deferoxamine. EC 200-738-5. N=11, clearance as dose over AUC appears to be correct. Dose 50 mg/kg/24hr over 48 hours. MRT appears a bit smaller than when calculated from reported AUMC, AUC and clearance. AUC0-inf 354 umol.h.L-1; AUMC0-inf 9170 umol.h2.L-1. All data taken as is from paper. MW 560.69		1960	560.68	14	6	205.8	23	cationic	-2.6	-5.8
Desipramine	50-47-5	CNCCCN1c2ccccc2CCc3ccccc13	15	11	0.16	23	22	Ciraulo DA, Barnhill JG, and Jaffe JH (1988) Clinical pharmacokinetics of imipramine and desipramine in alcoholics and normal volunteers. Clin. Pharmacol. Ther. 43: 509-518. Brosen K and Gram LF (1988) First-pass metabolism of imipramine and desipramine: impact of the sparteine oxidation phenotype. Clin. Pharmacol. Ther. 43: 400-406. Nyberg G and Maartensson E (1984) Determination of free fractio…	VDss calculated from C vs t data obtained by digitization of plots provided in the references. Data from CYP2D6 poor metabolizers not included.		1959	266.38	2	1	15.3	4	cationic	3.8	1.4
Desmethyldiazepam	1088-11-5	Clc1ccc2NC(=O)CN=C(c3ccccc3)c2c1	0.45	0.12	0.03	63	46	Klotz U, Antonin KH, Brugel H, and Bieck PR (1977) Disposition of diazepam and its major metabolite desmethyldiazepam in patients with liver disease. Clin. Pharmacol. Ther. 21: 430-436. Lucek RW and Coutinho CB. (1976) The role of substituents in the hydrophobic binding of the 1,4-benzodiazepines by human plasma proteins. Molec. Pharmacol. 12: 612-619.			1961	270.71	3	1	41.5	1	neutral	3	3
Desmopressin	16679-58-6	NC(=O)CC[C@@H]1NC(=O)[C@H](Cc2ccccc2)NC(=O)[C@H](Cc3ccc(O)cc3)NC(=O)CCSSC[C@H](NC(=O)[C@H](CC(=O)N)NC1=O)C(=O)N4CCC[C@H]4C(=O)N[C@H](CCCNC(=N)N)C(=O)NCC(=O)N	0.3	1.4		3.6	3	Rembratt A, Graugaard-Jensen C, Senderovitz T, Norgaard, JP, and Djurhuus JC (2004) Pharmacokinetics and pharmacodynamics of desmopressin administered orally versus intravenously at daytime versus night-time in healthy men aged 55-70 years. Eur. J. Clin. Pharmacol. 60: 397-402.	DDAVP.		1950	1069.22	26	14	435.4	20	cationic	-4.9	-8.4
Desvenlafaxine	93413-62-8	c1cc(ccc1O)[C@@H](CN(C)C)C1(CCCCC1)O	3.5	4.9	0.7	11.8	8.4	Nichols, Alice I.; Behrle, Jessica A.; Richards, Lyette S.; Parker, Vernon D.; Posener, Joel A.; Fruncillo, Richard; Paul, Jeffrey The absolute bioavailability of desvenlafaxine in healthy subjects. Journal of Bioequivalence & Bioavailability (2012), 4(2), 18-23.	Data digitized from Fig.1 in reference. Nichols, Alice I.; et al. Dose 50 mg 1h infusion, AUC = 2442 ng*h/mL, t1/2 = 9.8 h, CL = 0.268 L/h/kg, Vz = 3.66 L/kg The plasma protein binding of desvenlafaxine is low (30%) and is independent of drug concentration. PDR. Accessed February 20 2013. http://www.pdr3d.com/detail.php?c=84482#section-15.		1984	263.38	3	2	43.7	4	cationic	2.9	0.95
Dexamethasone	50-02-2	C[C@@H]1C[C@H]2[C@@H]3CCC4=CC(=O)C=C[C@]4(C)[C@@]3(F)[C@@H](O)C[C@]2(C)[C@@]1(O)C(=O)CO	0.94	3.3	0.32	4.7	3.7	Rose JQ, Yurchak AM, Meikle AW, and Jusko WJ (1981) Effect of smoking on prednisone, prednisolone, and dexamethasone pharmacokinetics. J. Pharmacokinet. Biopharm. 9: 1-14. Tsuei SE, Moore RG, Ashley JJ, and McBride WG (1979) Disposition of synthetic glucocorticoids. I. Pharmacokinetics of dexamethasone in healthy adults. J. Pharmacokinet. Biopharm. 7: 249-264.			1955	392.46	5	3	94.8	2	neutral	1.7	1.7
Dexanabinol	112924-45-5	CCCCCCC(C)(C)c1cc(c2c(c1)OC([C@@H]3[C@@H]2CC(=CC3)CO)(C)C)O	5.06	21.38		3.94	7.33	Brewster, M. E.; Pop, E.; Foltz, R. L.; Reuschel, S.; Griffith, W.; Amselem, S.; Biegon, A. Clinical pharmacokinetics of escalating i.v. doses of dexanabinol (HU-211 ), a neuroprotectant agent, in normal volunteers. International Journal of Clinical Pharmacology and Therapeutics, 1997, 35, 361-365.	HU-211. Data digitized for the 100 mg dose. Highly linear PK between 50, 100 and 200 mg. N=9 and 77.21 kg average weight derived from clearance data in mL/min and in mL/min/kg. AUCinf 60,579 ng.min/mL against reported AUC of 54,315 ng.min/mL. (11% difference).		1987	386.57	3	2	49.7	7	neutral	7.6	7.5
Dexfenfluramine	3239-44-9	CCN[C@@H](C)Cc1cccc(c1)C(F)(F)F	11	11	0.66	18	14	Cheymol G, Weissenburger J., Poirier JM, Gellee C. (1995) The pharmacokinetics of dexfenfluramine in obese and non-obese subjects. Br. J. Clin. Pharmacol. 39: 684-687. De la Torre R, Farre M, Navarro M, Pacifici R, Zuccaro P, and Pichini S (2004) Clinical pharmacokinetics of amfetamine and related substances: monitoring in conventional and non-conventional matrices. Clin. Pharmacokinet. 43: 157-1…	(S)-Fenfluramine. It was also reported as fenfluramine (data referring to d-fenfluramine = (S)-fenfluramine) from: FDA Approval package. 1996-Apr-29 PDF(6817k) Approval Package 020344 Part 04. Data very similar to those extracted by reference cited.		1958	231.26	1	1	12	4	cationic	3.5	1.7
Dexloxiglumide	119817-90-2	CCCCCN(CCCOC)C(=O)[C@@H](CCC(=O)O)NC(=O)c1ccc(Cl)c(Cl)c1	0.18	3.7	0.024	0.79	1.2	Webber C, Roth A, Persiani S, Peard AJ, Makovec F, Kapil RP, John BA, Holding JD, D'Amato M, Cybulski, ZR, Chasseaud LF, and Rovati LC (2003) Pharmacokinetics and metabolism of the cholecystokinin antagonist dexloxiglumide in male human subjects. Xenobiotica 33: 625-641.	Protein binding data for 1 ug/mL concentration is included.		1988	461.38	7	2	95.9	14	anionic	4.2	1
Dexmedetomidine	145108-58-3	C[C@H](c1c[nH]cn1)c2cccc(C)c2C	1.6	11	0.06	2.5	2.2	Anttila A, Penttila J, Helminen A, Vuorilehto L, and Scheinin H (2003) Bioavailability of dexmedetomidine after extravascular doses in healthy subjects. Br. J. Clin. Pharmacol. 56: 691-693. Precedex Product Label.			1994	200.28	2	1	28.7	2	neutral	2.8	2.7
Dexmethylphenidate	40431-64-9	c1ccc([C@H]([C@H]2CCCCN2)C(OC)=O)cc1	2.65	6.67	0.87	6.62	8	PDR. Accessed February 20 2013. http://www.pdr3d.com/detail.php?c=64365#section-3.	MRT from VDss and clearance. 70 kg assumed.	PDR. Accessed February 20 2013. http://www.pdr3d.com/detail.php?c=64365#section-3. The main urinary metabolite was ritalinic acid, accountable for approximately 80% of the dose.	1972	233.31	3	1	38.3	4	cationic	2.1	0.84
Dexniguldipine	120054-86-6	COC(=O)C1=C(C)NC(=C([C@@H]1c2cccc(c2)N(=O)=O)C(=O)OCCCN3CCC(CC3)(c4ccccc4)c5ccccc5)C	8.4	9.3		15	22	Goedhals L, Bezwoda WR, Abratt RP, Rathgeb F, Goebel KJ, and Wurst W (1995) Bioavailability and pharmacokinetic characteristics of dexniguldipine-HCl, a new anticancer drug. Int. J. Clin. Pharmacol. Ther. 33: 664-669.	VDss calculated from C vs t data obtained by digitization of plots provided in the reference.		1987	609.71	9	1	113.7	12	cationic	6.8	5.9
Dexrazoxane	24584-09-6	C[C@@H](CN1CC(=O)NC(=O)C1)N2CC(=O)NC(=O)C2	0.55	3.1	1	3	2.5	Rosing H, Ten Bokkel Huinink WW, Van Gijn R, Rombouts RFM, Bult A, and Beijnen JH (1999) Comparative open, randomized, cross-over bioequivalence study of two intravenous dexrazoxane formulations (Cardioxane and ICRF-187) in patients with advanced breast cancer, treated with 5-fluorouracil-doxorubicin-cyclophosphamide (FDC). Eur. J. Drug Metab. Pharmacokinet. 24: 69-77. Zinecard Product Label.	ICRF 187. Zinecard.		1969	268.27	8	2	98.8	3	neutral	-0.45	-0.5
Dextromoramide	357-56-2	C[C@H](CN1CCOCC1)C(C(=O)N2CCCC2)(c3ccccc3)c4ccccc4	0.47	2.19		3.88	3.18	Lancon J.P.; Pechinot A.; D'athis P.; Pechinot M.; Pointaire P.; Obadia J.F.; Caillard B. Dextromoramide pharmacokinetics in surgical patients. Ann. Fr. Anesth. Reanim. 1989, 8, 488-492.	N=9, and 5 mg iv dose. All data reported in table. 59 kg average weight		1957	392.53	4	0	32.8	6	neutral	3.4	3.4
Dezocine	53648-55-8	c12[C@@]3([C@H]([C@@H](CCCCC3)Cc1ccc(c2)O)N)C	5.6	27.5	0.08	4.6	3.9	Wilson JM, Cohen RI, Kezer EA, Schange SJ, Smith ER. Single- and multiple-dose pharmacokinetics of dezocine in patients with acute or chronic pain.J Clin Pharmacol. 1995 Apr;35(4):398-403.	Doses from 5-20. averaged by authors.		1976	245.36	2	2	46.3	0	cationic	3	1.1
DHA Paclitaxel	199796-52-6	CC\C=C/C\C=C/C\C=C/C\C=C/C\C=C/C\C=C/CCC(=O)O[C@H]([C@@H](NC(=O)c1ccccc1)c2ccccc2)C(=O)O[C@H]3C[C@@]4(O)[C@@H](OC(=O)c5ccccc5)[C@@H]6[C@@]7(CO[C@@H]7C[C@H](O)[C@@]6(C)C(=O)[C@H](OC(=O)C)C(=C3C)C4(C)C)OC(=O)C	0.068	0.025	0.0038	45	60	Sparreboom A, Wolff AC, Verweij J, Zabelina Y, van Zomeren DM, McIntire GL, Swindell CS, Donehower RC, and Baker SD (2003) Disposition of docosahaenoic acid-paclitaxel, a novel taxane, in blood: in vitro and clinical pharmacokinetic studies. Clin. Cancer Res. 9: 151-159.	Pharmacokinetic paremeters were calculated from C vs t data obtained by digitization of the plot provided in the reference.		1997	1164.38	16	3	227.4	30	neutral	9	9
Diatrizoic Acid (Amidotrizoate)	117-96-4	CC(=O)Nc1c(I)c(NC(=O)C)c(I)c(C(=O)O)c1I	0.26	1.7	1	2.6	1.8	Feldman S, Hayman LA, and Hulse M (1984) Pharmacokinetics of low- and high-dose intravenous diatrizoate contrast media administration. Invest. Radiol. 19: 54-57. Back SE, Krutzen E, and Nilsson-Ehle P (1988) Contrast media as markers for glomerular filtration: a pharmacokinetic comparison of four agents. Scand. J. Clin. Lab Invest. 48: 247-253.			1953	613.91	6	3	95.5	3	anionic	0.98	-2.3
Diazepam	439-14-5	CN1C(=O)CN=C(c2ccccc2)c3cc(Cl)ccc13	1	0.38	0.023	44	42	Klotz U, Avant GR, Hoyumpa A, Schenker S, and Wilkinson (1975) The effects of age and liver disease on the disposition and elimination of diazepam in adult man. J. Clin. Invest. 55: 347-359. Andersson T, Andren K, Cederberg C, Edvardsson G, Heggelund A, and Lundborg P (1990) Effect of omeprazole and cimetidine on plasma diazepam levels. Eur. J. Clin. Pharmacol. 39: 51-54. Herman RJ and Wilkinson …			1961	284.74	3	0	32.7	1	neutral	2.8	2.8
Diazoxide	364-98-7	CC1=NS(=O)(=O)c2cc(Cl)ccc2N1	0.21	0.06	0.06	58	48	Oglivie RI, Nadeau JH, and Sitar DS (1982) Diazoxide concentration-response relation in hypertension. Hypertension 4: 167-173. Kirsten R, Nelson K, Kirsten D, and Heintz B (!988) Clinical pharmacokinetics of vasodilators. Part I. Clin. Pharmacokinet. 34: 457-482.			1961	230.67	4	1	58.5	0	neutral	1.2	1.2
Dibekacin	34493-98-6	NC[C@@H]1CC[C@@H](N)[C@@H](O[C@@H]2[C@@H](N)C[C@@H](N)[C@H](O[C@H]3O[C@H](CO)[C@@H](O)[C@H](N)[C@H]3O)[C@H]2O)O1	0.13	0.8		2.7	2.4	Arancibia A, Chavez J, Ibarra R, Ruiz I, Icarte A, Thambo S, and Chavez H (1987) Disposition kinetics of dibekacin in normal subjects and in patients with renal failure. Int. J. Clin. Pharmacol, Ther. Toxicol. 25: 38-43. Goto M, Sugiyama M, and Ishizaki T (1980) Pharmacokinetic studies with dibekacin, a new aminoglycoside, after intravenous and intramuscular administration to human volunteers. An…	Plasma concentrations measured with a bioassay.		1971	451.52	13	9	247.9	6	cationic	-6	-8
Dichloroacetic Acid	79-43-6	OC(=O)C(Cl)Cl	0.19	5.3		0.6	0.65	Jia M, Coats B, Chadha M, Frentzen B, Perez-Rodriguez J, Chadik PA, Yost RA, Henderson GN, and Stacpoole PW (2006) Human Kinetics of Orally and Intravenously Administered Low-Dose 1,2-13C-Dichloroacetate. J. Clin. Pharmacol. 46: 1449-1459.			1885	128.94	2	1	37.3	1	anionic	0.9	-2.5
Diclofenac	15307-86-5	OC(=O)Cc1ccccc1Nc2c(Cl)cccc2Cl	0.22	3.5	0.005	1	1.4	Willis JV, Kendall MJ, Flinn RM, Thornhill DP, and Welling PG (1979) The pharmacokinetics of diclofenac sodium following intravenous and oral administration. Eur. J. Clin. Pharmacol. 16: 405-410. Leucuta SE, Rus V, Bolosiu H, Mocan A, Polinicencu C, and Bojita M (1996) Farmacocinetica diclofenacului sodic administrat in doza unica pe cale intravenosa si orala sub forma de solutie injectabilia exp…	VDss calculated using micro rate constants and exponential fit parameters reported in the references.		1968	296.15	3	2	49.3	4	anionic	4	1.1
Dicloxacillin	3116-76-5	Cc1onc(c1C(=O)N[C@H]2[C@H]3SC(C)(C)[C@@H](N3C2=O)C(=O)O)c4c(Cl)cccc4Cl	0.11	2	0.033	0.92	0.88	Dittert LW, Griffen WO, LaPiana JC, Shainfeld FJ, and Doluisio JT (1969) Pharmacokinetic interpretation of penicillin levels in serum and urine after intravenous administration. Antimic. Agents Chemother. 9, 42-48. Roder BL, Frimodt-Moller, Espersen F, and Rasumussen SN (1995) Dicloxacillin and flucloxacillin: pharmacokinetics, protein binding and serum bacteriocidal titers in healthy subjects af…	VDss calculated using micro rate constants reported in the reference by Dittert, et al. Concentrations determined using a bioassay.		1964	470.33	8	2	113	4	anionic	3.3	0.023
Didanosine	69655-05-6	OC[C@@H]1CC[C@@H](O1)n2cnc3C(=O)NC=Nc23	0.77	11	0.95	1.2	1.4	Knupp CA, Shyu WC, Dolin R, Valentine FT, McLaren C, Martin RR, Pittman KA, and Barbhaiya RH (1991) Pharmacokinetics of didanosine in patients with acquired immunodeficiency syndrome or acquired immunodeficiency syndrome-related complex. Clin. Pharmacol. Ther. 49: 523-535. Videx Product Label.	2',3'-Dideoxyinosine, NSC612049		1979	236.23	7	2	88.7	2	neutral	-0.93	-0.95
Didemnin B	77327-05-0	N1(C([C@H]2N(C([C@@H](NC([C@H](C([C@@H](OC(C[C@@H]([C@H](NC([C@H]([C@H](OC([C@@H]1Cc1ccc(cc1)OC)=O)C)NC([C@H](N(C([C@H]1N(C(=O)[C@@H](O)C)CCC1)=O)C)CC(C)C)=O)=O)[C@H](CC)C)O)=O)C(C)C)=O)C)=O)CC(C)C)=O)CCC2)=O)C	1.42	12.22		1.94	4.8	Benvenuto J A; Newman R A; Bignami G S; Raybould T J; Raber M N; Esparza L; Walters R S. Phase II clinical and pharmacological study of didemnin B in patients with metastatic breast cancer. Investigational new drugs 1992, 10, 113-117.	NSC-325319. 10 patients and 13 courses. 1.73 m2/70 kg conversion factor. 5.6 to 76 mg/m2 doses. Average across all courses.		1981	1112.35	22	5	287.9	15	neutral	3.5	3.5
Dienogest	65928-58-7	C[C@]12CCC3=C4CCC(=O)C=C4CC[C@H]3[C@@H]1CC[C@@]2(O)CC#N	0.6	1.29	0.1	8.52	11	https://www.accessdata.fda.gov/drugsatfda_docs/nda/2010/022252_Orig-1_ClinPharmR.pdf Accessed May 19 2017	Dinagest. Visanne. ZK 37659. Average weight assumed to be 70 kg. 85 mcg 3H-dienogest. MRT from VDss and clearance.		1977	311.42	3	1	61.1	2	neutral	2.1	2.1
Diflomotecan	220997-97-7	[H]O[C@]1(CC)CC(=O)OCC2=C1C=C1c3c(CN1C2=O)cc1cc(c(cc1n3)F)F	1.42	8.42	0.125682	3.87	3.1	Scott L; Soepenberg O; Verweij J; de Jonge M J A; Th Planting A S; McGovern D; Principe P; Obach R; Twelves C. A multicentre phase I and pharmacokinetic study of BN80915 (diflomotecan) administered daily as a 20-​min intravenous infusion for 5 days every 3 weeks to patients with advanced solid tumours. Annals of Oncology, 2007, 18(3), 569-575. fu from Lombardo et al J. Clin. Pharmacol. 2013, 53(2…	Data corrected for body surface area from weight averaged 0.05-0.15 mg/m2 iv infusion (20 min) doses (N=3 to N=11) (see Table 5). Conversion of 1.73 m2 to 70 Kg.		1999	398.36	6	1	79.7	2	neutral	-0.7	-0.7
Diflunisal	22494-42-4	OC(=O)c1cc(ccc1O)c2ccc(F)cc2F	0.097	0.1	0.0016	14	10	Nuernberg B and Brune K (1989) Buffering the stomach content enhances the absorption of diflunisal in man. Biopharm. Drug Dispos. 10: 377-387. Lin JH (1989) Species differences in protein binding of diflunisal. Drug Metab. Dispos. 17: 221-223.	Parameters calculated from a digitized C vs t plot provided in the report. Note: N=1		1968	250.2	3	2	57.5	2	anionic	3.7	0.31
Digitoxin	71-63-6	C[C@H]1O[C@H](C[C@H](O)[C@@H]1O)O[C@H]2[C@@H](O)C[C@H](O[C@H]3[C@@H](O)C[C@H](O[C@H]4CC[C@@]5(C)[C@H](CC[C@@H]6[C@@H]5CC[C@]7(C)[C@H](CC[C@]67O)C8=CC(=O)OC8)C4)O[C@@H]3C)O[C@@H]2C	0.44	0.043	0.066	170	180	Ochs HR, Grube E, Greenblatt DJ, Arendt R, and Bodem G (1981) Pharmacokinetics and pharmacodynamics of intravenous digoxin and digitoxin. Klin. Wochenschr. 59: 889-897. Kurz H, Mauser-Ganshorn A, and Stickel HH (1977) Differences in the binding of drugs to plasma proteins from newborn and adult man. I. Eur. J. Clin. Pharmacol. 11: 463-467.	VDss calculated using C vs t data obtained from digitization of a plot reported in the reference.		1907	764.94	13	5	182.8	7	neutral	1.2	1.2
Digoxin	20830-75-5	C[C@H]1O[C@H](C[C@H](O)[C@@H]1O)O[C@H]2[C@@H](O)C[C@H](O[C@H]3[C@@H](O)C[C@H](O[C@H]4CC[C@@]5(C)[C@H](CC[C@@H]6[C@@H]5C[C@@H](O)[C@]7(C)[C@H](CC[C@]67O)C8=CC(=O)OC8)C4)O[C@@H]3C)O[C@@H]2C	4.1	1.7	0.7	40	38	Cusack B, Kelly J, O'Malley K, Noel J, Lavan J, and Horgan J (1979) Digoxin in the elderly: pharmacokinetic consequences of old age. Clin. Pharmacol. Ther. 25: 772-776. Ohnhaus EE, Spring P, and Dettli L (1972) Protein binding of digoxin in human serum. Eur. J. Clin. Pharmacol. 5: 34-36.	VDss calculated using C vs t data obtained from digitization of a plot reported in the reference.		1930	780.94	14	6	203.1	7	neutral	0.21	0.21
Dihydrocodeine	125-28-0	CN1CC[C@]23c4c5ccc(c4O[C@H]2[C@H](CC[C@H]3[C@H]1C5)O)OC	1.07	4.21		4.08	3.42	F. J. Rowell, R. A. Seymour, and M. D. Rawlins. Pharmacokinetics of Intravenous and Oral Dihydrocodeine and its Acid Metabolites. Eur J Clin Pharmacol 1983, 25, 419-424.	Values calculated from A,B, alpha and beta constants reported for N=7 volunteers, 30 mg dose, average weight 70 kg. VDss calculated via V1 and k12,k21 as wellas MRT and clearance obtained via macroconstants.		1912	301.38	4	1	41.9	1	cationic	2	0.29
Dihydroergosine	7288-61-1	CC(C)C[C@H]1C(=O)N2CCC[C@H]2[C@]3(N1C(=O)[C@](O3)(C)NC(=O)[C@@H]4C[C@@H]5c6cccc7c6c(c[nH]7)C[C@H]5N(C4)C)O	4.02	12.85		5.01	8.84	Cvelbar, Polona; Culig, J.; Kopitar, Z.; Lenardic, A.; Urbancic-Smerkolj, Janja; Zorz, M. Bioavailability of dihydroergosine in healthy volunteers. Proc. - 3rd Eur. Congr. Biopharm. Pharmacokinet., 1987, Volume 3, 147-53	N=8, 0.75 mg dose, 75 kg median weight. Clearance recalculated from dose and AUC. Erroneously reported as 0.96 mL/min when it should have been 0.96 L/min.	Nice example of enterohepatic recirculation.	1943	549.66	10	3	118.2	4	cationic	3.7	3.2
Dihydroergotamine	511-12-6	N12[C@@]([C@H]3N(CCC3)C([C@@H]1Cc1ccccc1)=O)(O[C@](NC([C@@H]1C[C@@H]3c4c5c(c[nH]c5ccc4)C[C@H]3[N@@](C1)C)=O)(C)C2=O)O	0.33	15.07	0.07	0.36	0.55	J. KANTO, H. ALLONEN, K. KOSKI, M. KOULU, R. LAMMINTAUSTA, R. MANTYLA, T. KLEIMOLA, and T. SIlRTOLA. Pharmacokinetics of dihydroergotamine in healthy volunteers and in neuroiogical patients after a single intravenous injection. ppb: https://www.accessdata.fda.gov/drugsatfda_docs/label/2002/20148s7s8lbl.pdf. Accessed May 10 2017.	N=5, 70 kg average weight reported, 1 mg dose. MRT from clearance and VDss. Data were also digitized and, although the digitization was difficult, the VDss is very close to reported with a clearance somewhat inferior but within 20%. The data reported were deemed more reliable than those in Little et al and Wyss et al.	Data from Wysss et all seems inconsistent with labeling of plot and results after digitization. P. A. Wyss, J. Rosenthaler, E. Niiesch, and W. H. Aellig. Pharmacokinetic investigation of oral and IV dihydroergotamine in healthy subjects. Eur. J. Clin. Pharmacol. 1991 41, 597-602. Intially digitized and then discarded. Similarly, data digitized from Little et al. seemed to agree with Kanto et al b…	1942	583.68	10	3	118.2	4	cationic	3.8	3.3
Dihydroquinidine	1435-55-8	CC[C@H]1CN2CC[C@H]1C[C@@H]2[C@@H](O)c3ccnc4ccc(OC)cc34	2.8	4.2	0.22	11	5.7	Ueda CT, Williamson BJ, and Dzindzio BS (1976) Disposition kinetics of dihydroquinidine following quinidine administration. Res. Comm. Chem. Path. Pharmacol. 14: 215-225. Leroyer R, Varoquaux O, Guillebastres R, Jarreau C, Normand JP, Jaillon P, Advenier C, and Pays M (1986) Study on protein binding of 3-(R)- and 3-(S)-hydroxy derivatives of quinidine and dihydroquinidine. Therapie 41: 159-162.			1913	326.43	4	1	45.6	4	cationic	3.2	1.7
Dilevalol	75659-07-3	C[C@H](CCc1ccccc1)NC[C@H](O)c2ccc(O)c(c2)C(=O)N	4.8	29		2.8	3.3	Neubeck M, Becker C, Henke D, Roesch W, Spahn-Langguth H, and Mutschler E. (1993) Pharmacokinetics of dilevalol and its conjugates in man: assay method for plasma, blood, urine and bile samples and preliminary pharmacokinetic studies. Arz. Forsch. 43: 953-957.			1980	328.41	5	4	95.6	8	cationic	1.8	0.97
Diltiazem	42399-41-7	COc1ccc(cc1)[C@@H]2Sc3ccccc3N(CCN(C)C)C(=O)[C@@H]2OC(=O)C	4.1	13	0.18	5.3	5.6	Hoglund P and Nilsson LG (1988) Physiological disposition of intravenously administered 14C-labeled diltiazem in healthy volunteers. Ther. Drug Monit. 10: 401-409. Kolle EU, Ochs HR, and Vollmer KO (1983) Pharmacokinetic model of diltiazem. Arz. Forsch. 33: 972-977. Kirsten R, Nelson K, Kirsten D, and Heintz B (!988) Clinical pharmacokinetics of vasodilators. Part I. Clin. Pharmacokinet. 34: 457-…	Different values reported for terminal phase half-life in the Hoglund and Nillson vs the Kolle et al reports.		1973	414.52	6	0	59.1	7	cationic	3.1	2.7
Dimetindene	5636-83-9	C=1(c2c(cccc2)CC1CCN(C)C)[C@@H](c1ccccn1)C	2.16	4.83		5.98	4.6	Arnera, V.; Wermeille, M.; Wellman, M.; Llull, J. B.; Althaus, M. A.; Balant, L. P. Pharmacokinetics of dimetindene after intravenous and oral administration to healthy volunteers. Arzneimittel-Forschung, 1990, 40, 1346-1348.	Data digitized from plot. AUCinf calculated within 2% of reported AUCinf. N=8, 4 mg dose, 75 kg median weight taken from reported range.		1960	292.42	2	0	16.1	5	cationic	4	2.5
Dinaciclib	779353-01-4	c1(cc(nc2n1ncc2CC)N1[C@@H](CCCC1)CCO)NCc1cn(=O)ccc1	0.32	4.65		1.1	2.1	John J Nemunaitis, Karen A Small, Paul Kirschmeier, Da Zhang, Yali Zhu, Ying-Ming Jou, Paul Statkevich, Siu-Long Yao and Rajat Bannerji. A first-in-human, phase 1, dose-escalation study of dinaciclib, a novel cyclin-dependent kinase inhibitor, administered weekly in subjects with advanced malignancies. Journal of Translational Medicine 2013, 11:259 (page1-14)	Data digitized from plot reported and compared to AUC in supplementary information. Day 1, 12 mg/m2, N=11. AUC(inf) 92% of reported. 70 kg weight assumed.		2004	396.49	8	2	88.7	7	neutral	0.88	0.88
Diphenhydramine	58-73-1	CN(C)CCOC(c1ccccc1)c2ccccc2	6.5	9.8	0.19	11	9.3	Meredith CG, Christian CD, Johnson RF, Madhavan SV, and Schenker S (1984) Diphenhydramine disposition in chronic liver disease. Clin. Pharmacol. Ther. 35: 474-479. Spector R, Choudhury AK, Chiang CK, Goldberg MJ, and Ghoneim MM (1980) Diphenhydramine in Orientals and Caucasians. Clin. Pharmacol. Ther. 28: 229-234.			1945	255.35	2	0	12.5	6	cationic	3.5	2.3
Diprafenone	81447-80-5	CCC(C)(C)NCC(O)COc1ccccc1C(=O)CCc2ccccc2	1.2	11	0.017	1.9	1.5	Trenk D, Wagner F, Sachs W, and Jaehnchen E (1989) Pharmacokinetic characterization of the antiarrhythmic drug diprafenone in man. Eur. J. Clin. Pharmacol. 37: 313-316.			1983	369.5	4	2	58.6	11	cationic	4	2
Diprophylline	479-18-5	CN1C(=O)N(C)c2ncn(CC(O)CO)c2C1=O	0.42	4.8		1.5	1.7	Zuidema J and Merkus FWHM (1981) Pharmacokinetics and pharmacodynamics of diprophylline. Pharm. Weekbl. 3: 1320-221.	Diphyllin. Propyphillin. VDss was calculated using C vs t data obtained by digitization of the plot provided in the reference.		1902	254.24	8	2	98.9	3	neutral	-1.2	-1.2
Dipyridamole	58-32-2	c12c(c(N3CCCCC3)nc(n2)N(CCO)CCO)nc(N(CCO)CCO)nc1N1CCCCC1	0.82	2	0.009	6.8	13	Bjornsson TD, Mahony C. Clinical pharmacokinetics of dipyridamole. Thromb Res Suppl. 1983, 4, 93-104.	Data from digitization of PK profile reported in Fig 2 in reference. Dose 20 mg 4min infusion, N=6, BW = 60 kg. Reported data in table 1 : CL (mL/min/kg) = 2.3 t1/2(h) = 11.6, Vz(L/kg) = 2.35. Vz from digitization = 2.3 L/kg		1939	504.63	12	4	145.4	12	cationic	2	1.4
Disopyramide	3737-09-5	CC(C)N(CCC(C(=O)N)(c1ccccc1)c2ccccn2)C(C)C	0.52	0.9	0.16	9.6	7	Lima JJ, Haughey DB, and Leier CV (1984) Disopyramide pharmacokinetics and bioavailability following the simultaneous administration of disopyramide and 14C-disopyramide. J. Pharmacokinet. Biopharm. 12: 289-313.			1962	339.47	4	1	59.2	8	cationic	2.2	-0.11
Distigmine	17299-00-2	c1(OC(N(CCCCCCN(C(Oc2c[n+](ccc2)C)=O)C)C)=O)c[n+](ccc1)C	1	0.2		82.4	59.8	Vree TB, Waitzinger J, Hammermaier A, Radhofer-Welte S.Absolute bioavailability, pharmacokinetics, renal and biliary clearance of distigmine after a single oral dose in comparison to i.v. administration of 14C-distigmine-bromide in healthy volunteers. International journal of clinical pharmacology and therapeutics, 1999,37, 393-403.	UBRETID. CAS number and SMILES entered dication only (no Br-). N=6, 86.2 kg average weight. 3' infusion. Bromide salt CAS # = 15876-67-2	85% excreted unchanged after renally (14.8 mL/min vs. totl of 17.1 mL/min) from ref. cited.	1957	416.51	8	0	66.8	11	neutral	-5.7	-5.7
Disufenton sodium	168021-79-2	[Na+].[Na+].c1(cc(c(cc1)\C=[N+](\C(C)(C)C)[O-])S(=O)(=O)[O-])S(=O)(=O)[O-]	0.18	1.35	0.6	2.2	3.6	Cheng Y.-F et al. Pharmacokinetics of 8-hour intravenous infusion of NXY-059: A phase I, randomized, double blind (within dose panel) , placebo-controlled study in healthy chinese volunteers. (2008) Clin. Ther. 30, 2342-2353.	NXY059. CXY 059 and cerovive. N=27 chinese subjects and 28 caucasian subjects. Weight 60.8 and 72. 6 kg respectively. Chinese subjects averaged across doses and data for noncompartmental analysis reported. Overall average reported. Also as CXY 059 and cerovive.		1995	381.33	8	0	140.5	3	neutral	-3.5	-8.5
Dixyrazine	2470-73-7	CC(CN1CCN(CC1)CCOCCO)CN2c3ccccc3Sc4c2cccc4	4.06	16.27		4.16	3.11	Liedholm H, Lidén A, Kroon L, Melander A, Wåhlin-Boll E. Pharmacokinetics of dixyrazine: low bioavailability improved by food intake. Drug-Nutr. Interact. 1985, 3, 87-92	N =8, median weight 64 kg, 10 mg dose equivalent to 23386 nmol or 365.4 nmol/kg (MW 427.61). Data digitized from plot. First point digitized separately due to Y-axis "break". AUC0-12 reported as 2.5-fold of actual to normalize to po dose. After correction calculated AUC0-12 within 6% of reported value.		1958	427.6	5	1	39.2	9	cationic	3.8	3
Dobesilic acid	88-46-0	O=S(=O)(O)c1c(O)ccc(O)c1	0.12	0.87		2.41	2.01	G. Franke, T. Schneider, W. Siegmund, A. Scherber. Bioavailability studies of calcium dobesilate- a case of flip-flop kinetics. Pharmazie, 1985, 40, 562-563.	N=10, iv bolus, 500 mg dose, 68.7 kg average weight. AUCinf digitized 139.7 mg.h.L-1, reported 139 mg.hr.L-1 (AUC0-t digitized 137.4 mg.hr.L-1).	Administered as calcium salt. Structure and CAS# refers to neutral compound.	1923	190.17	5	3	94.8	1	neutral	-1.1	-4
Dobutamine	34368-04-2	c1(cc(CCN[C@@H](CCc2ccc(cc2)O)C)ccc1O)O		115				R A Berg, J F Padbury, R L Donnerstein, S E Klewer, J J Hutter, Jr. Dobutamine pharmacokinetics and pharmacodynamics in normal children and adolescents. J.Pharmacol. Exp. Ther. 1993 265 (3) 1232-1238.	No other data reported.		1974	301.38	4	4	72.7	7	cationic	3.4	1.7
Docetaxel	114977-28-5	CC(=O)O[C@@]12CO[C@@H]1C[C@H](O)[C@]3(C)[C@@H]2[C@H](OC(=O)c4ccccc4)[C@]5(O)C[C@H](OC(=O)[C@H](O)[C@@H](NC(=O)OC(C)(C)C)c6ccccc6)C(=C([C@@H](O)C3=O)C5(C)C)C	2.1	14	0.04	2.5	11	Rosing H, Lustig V, van Warmerdam LJC, Huizing MT, ten Bokkel Huinink WW, Schellens JHM, Rodenhuis S, Bult A, and Beijnen JH (2000) Pharmacokinetics and metabolism of docetaxel administered as a 1-h intravenous infusion. Cancer Chemother. Pharmacol. 45: 213-218. Minami H, Kawada K, Sasaki Y, Igarashi T, Saeki T, Tahara M, Itoh K, and Fujii H (2006) Pharmacokinetics and pharmacodynamics of protein…			1988	807.88	15	5	224.4	12	neutral	3	3
Dofetilide	115256-11-6	CN(CCOc1ccc(NS(=O)(=O)C)cc1)CCc2ccc(NS(=O)(=O)C)cc2	3.3	5.2	0.36	11	8.1	Gemmill JD, Howie CA, Meredith PA, Kelman AW, Rasmussen HS, Hillis WS, and Elliott HL (1991) A dose ranging study of UK-68,798, a novel class III anti-arrhythmic agent, in normal volunteers. Br. J. Clin. Pharmacol. 32: 429-432. Smith DA, Rasmussen HS, Stopher DA, and Walker DK (1992) Pharmacokinetics and metabolism of dofetilide in mouse, rat, dog and man. Xenobiotica 22: 709-719.			1987	441.56	8	2	104.8	11	cationic	1.9	1.2
Dolasetron	115956-12-2	O=C(O[C@@H]1C[C@@H]2CC3C[C@H](C1)N2CC3=O)c4c[nH]c5ccccc45	2	180	0.49	0.19	0.13	Dimmit DC, Choo YS, Martin LA, Arumugham T, Hahne WF, and Weir SJ (1999) Intravenous pharmacokinetcs and absolute oral bioavailability of dolasetron in healthyl volunteers: part 1. Biopharm. Drug Disp. 20, 29-39. ppb: Stuart W. Paine, Karelle Menochet, Rebecca Denton, Dermot F. McGinnity, and Robert J. Riley. Prediction of Human Renal Clearance from Preclinical Species for a Diverse Set of Drugs …	Pharmacokinetic parameters were calculated from C vs t data obtained by digitization of the plot provided in the reference.		1988	324.37	5	1	62.4	3	cationic	3.3	2.4
Domperidone	57808-66-9	Clc1ccc2N(C3CCN(CCCN4C(=O)Nc5ccccc45)CC3)C(=O)Nc2c1	3.4	9.5	0.082	6	7.5	Heykants J, Hendriks R, Meuldermans W, Michiels M, Scheygrond H, and Reyntjens H (1981) On the pharmacokinetics of domperidone in animals and man. IV. The pharmacokinetics of intravenous domperidone and its bioavailability in man following intramuscular, oral and rectal administration. Eur. J. Drug Metab. Pharmacokinet. 6: 61-70.	VD calculated from micro rate constants reported in the paper by Heykants, et al.		1977	425.91	7	2	67.9	5	cationic	3.6	3.1
Dopamine	51-61-6	c1(cc(c(O)cc1)O)CCN	0.74	65.9	0.87	0.19	0.42	Data digitized from Fig. 1 P.-0. JARNBEG, L. BENGTSSOJN, E KSTRANaD, B. HAMBERCER Dopamine Infusion in Man. Plasma Catecholamine Levels and Pharmacokinetics. Acta anaesth. scand. 1981, 25, 328-331.//ppb: Gunhild Franksson and Erik Änggård The Plasma Protein Binding of Amphetamine, Catecholamines and Related Compounds. Acta Pharmacol. Toxicol.1970, 28, 209-214.	N=8 for 2 and 5 ug/kg/min, 30' infusion. Data digitized from Fig.1		1910	153.18	3	3	66.5	2	cationic	0.56	-2
Doripenem	148016-81-3	[H]N1C[C@@H](C[C@H]1CN([H])S(N([H])[H])(=O)=O)SC1=C(C(=O)O[H])N2C([C@@H]1C)[C@@H](C2=O)[C@H](C)O[H]	0.23	3.26	0.92	1.2	1.2	Cirillo I. et al. Pharmacokinetics, safety and tolerability of doripenem after 0.5-, 1- and 4-hour infusions in healthy volunteers. J. Clin. Pharmacol. 2009, 49, 798-806.	N=96, average weight 72.1 kg. Data reported as weighted average of 5 dosing regimens (infusions) from 500 to 1000 mg and 0.5 to 4 hours. Average VDss 16.96 L and clearance 14.12 L/h. renal clearance 10.3 L/h = 2.38 ml/min/kg or 73% of total clearance.		1993	420.5	10	5	162.1	10	zwitterionic	-1.5	-3.9
Doxacurium	133814-18-3	COc1cc(CC2c3c(CC[N+]2(C)CCCOC(=O)CCC(=O)OCCC[N+]4(C)CCc5cc(OC)c(OC)c(OC)c5C4Cc6cc(OC)c(OC)c(OC)c6)cc(OC)c(OC)c3OC)cc(OC)c1OC	0.22	2.7	0.53	1.4	1.7	Cook DR, Freeman JA, Lai AA, Robertson KA, Kang Y, Stiller RL, Aggarwal S, Abou-Donia MM, and Welch RM (1991) Pharmacokinetics and pharmacodynamics of doxacurium in normal patients and in those with hepatic or renal failure. Anesth. Analg. 72: 145-150. Roy JJ and Varin F (2004) Physicochemical properties of neuromuscular blocking agents and their impact on the pharmacokinetic-pharmacodynamic rela…			1990	1035.22	18	0	163.4	29	neutral	0.57	0.57
Doxapram	309-29-5	CCN1CC(CCN2CCOCC2)C(C1=O)(c3ccccc3)c4ccccc4	1.2	5.3		3.7	4.1	Robson RH and Prescott LF (1978) A pharmacokinetic study of doxapram in patients and volunteers. Br. J. Clin. Pharmacol. 7: 81-87.	VDss calculated from digitized from plot reported		1963	378.51	4	0	32.8	6	neutral	3.2	3.1
Doxazosin	74191-85-8	COc1cc2nc(nc(N)c2cc1OC)N3CCN(CC3)C(=O)C4COc5ccccc5O4	1.3	1.6	0.017	14	10	Meredith PA, Elliott HL, Kelman AW, and Reid JL (1985) Application of pharmacokinetic-pharmacodynamic modelling for the comparison of quinazoline alpha-adrenoreceptor agonists in normotensive volunteers. J. Cardiovasc. Pharmacol. 7: 532-537. Vincent J, Meredith PA, Elliott HL, and Reid JL (1986) The pharmacokinetics of doxazosin in elderly normotensives. Br. J. Clin. Pharmacol. 21: 521-524. Kaye …			1979	451.48	10	1	112.3	4	neutral	2.6	2.6
Doxepin	1668-19-5	CN(C)CC\C=C\1/c2ccccc2COc3ccccc13	12	14	0.2	15	15	Yan JH, Hubbard JW, McKay G, Korchinski ED, Midha KK (2002) Absolute bioavailability and stereoselective pharmacokinetics of doxepin. Xenobiotica 32: 615-623. Virtanen R, Iisalo E, and Irjala K (1982) Protein binding of doxepin and desmethyldoxepin. Acta Pharmacol. Toxicol. 51: 159-164.	Z- and E isomer data were averaged.		1962	279.38	2	0	12.5	3	cationic	4.2	2.8
Doxifluridine	3094-09-5	C[C@H]1O[C@H]([C@H](O)[C@@H]1O)N2C=C(F)C(=O)NC2=O	0.28	11	0.61	0.46	0.35	Schaaf LJ, Dobbs BR, Edwards IR, and Perrier DG (1988) The pharmacokinetics of doxifluridine and 5-fluorouracil after single intravenous infusions of doxifluridine to patients with colorectal cancer. Eur. J. Clin. Pharmacol. 34: 439-443. Meynial D, Lopez A, Malet-Martino MC, Hoffmann JS, and Martino R (1988) Application of fluorine-19 nuclear magnetic resonance to the determination of plasma-prot…	Concentration dependent; fu data cited is for the lowest concentration.		1958	246.19	7	3	99.1	1	neutral	-1.3	-1.5
Doxofylline	69975-86-6	c12c(n(c(=O)n(c2=O)C)C)ncn1CC1OCCO1	1.03	6.83		2.5	1.66	Bologna E; Lagana A; Terracino D; Bolignari P; Biffignandi P. Oral and intravenous pharmacokinetic profiles of doxofylline in patients with chronic bronchitis. The Journal of international medical research. 1990, 18, 282-288.	Data digitized from plot. 100 mg dose. 66 average weight reported. Systemic clearance in text reported as 6.90 mL.min-1.kg-1 and in very good agreement with calculations. However, clearance reported in table 1 and labeled total clearance (in mL/min) was 683.6. Divided by 66 kg weight yields 10.35 mL.min-1.kg-1. Also, sd for clearance much lower than actual from the values reported. sd reported 19…		1978	266.25	8	0	80.3	2	neutral	-0.36	-0.36
Doxorubicin	23214-92-8	COc1cccc2C(=O)c3c(O)c4C[C@](O)(C[C@H](O[C@H]5C[C@H](N)[C@H](O)[C@H](C)O5)c4c(O)c3C(=O)c12)C(=O)CO	22	15	0.28	24	32	Carmaggi CM, Comparsi R, Strocchi E, Testoni F, Angelli B, and Pannuti F (1988) Epirubicin and doxorubicin comparative metabolism and pharmacokinetics. Canc. Chemother. Pharmacol. 21: 221-228. Piscitelli SC, Rodvold KA, Rushing DA, and Tewksbury DA (1993) Pharmacokinetics and pharmacodynamics of doxorubicin in patients with small cell lung cancer. Clin. Pharmacol. Ther. 53: 555-561. Eksborg S, Eh…	Adriamycin, Adriblastin.		1971	543.52	12	6	206.1	5	cationic	0.46	-2.2
Doxycycline	564-25-0	C[C@@H]1[C@H]2[C@H](O)[C@H]3[C@H](N(C)C)C(=C(C(=O)N)C(=O)[C@@]3(O)C(=C2C(=O)c4c(O)cccc14)O)O	0.69	0.46	0.12	25	14	Nguyen VX, Nix DE, Gillikin S, and Schentag JJ (1989) Effect of oral antacid administration on the pharmacokinetics of intravenous doxycycline. Antimic. Agents Chemother. 33: 434-436. Houin G, Brunner F, Nebout T, Cherfaoui M, Lagrue G, and Tillement JP (1983) The effects of chronic renal insufficiency on the pharmacokinetics of doxycycline in man. Br. J. Clin. Pharmacol. 16: 245-252. Raghuram TC…			1958	444.43	10	6	181.6	2	anionic	-0.64	-3.3
DP-b99	222315-88-0	CCCCCCCCOCCOC(=O)CN(CC(=O)O)c1ccccc1OCCOc2ccccc2N(CC(=O)O)CC(=O)OCCOCCCCCCCC	1.1	14		1.3	3.5	Rosenberg G, Angel I, and Kozak A (2005) Clinical pharmacology of DP-b99 in healthy volunteers: First administration to humans. Br. J. Clin. Pharmacol. 60: 7-16.			1999	788.96	14	2	170.6	37	anionic	8.9	4.4
DQ-2556	102253-70-3	c1cc(cc[n+]1CC1=C(N2C([C@H]([C@H]2SC1)NC(=O)\C(=N\OC)c1nc(sc1)N)=O)C(=O)[O-])c1cnco1	0.22	1.76		2.64	1.78	M. Nakashima, T. Uematsu, M. Kanamaru, A. Mizuno, K. Matsubayashi, 0. Okazaki, S. Hashimoto, H. Hakusui, and Y. Osada. Phase I Study of DQ-2556, a New Parenteral 3-Quaternary Ammonium Cephalosporin Antibiotic. J Clin Pharmacol. 1993, 33,57-62	Data from Table I (5 minutes infusion) N=5/dose across 3 doses (500, 1000 and 2000 mg). 67.5 average weight reported. MRT from VDss and clearance.	Renal clearance 82%	1985	541.56	13	2	180.3	8	anionic	-1.6	-0.63
Dronedarone	141626-36-0	CS(=O)(=O)Nc1cc2c(c(oc2cc1)CCCC)C(=O)c1ccc(cc1)OCCCN(CCCC)CCCC	20	33.33	0.02	10	16	PDR. Accessed February 20 2013. http://www.pdr3d.com/detail.php?c=77881#section-14	MRT from VDss and Cl. 70 kg assumed. Ppb > 98%		1992	556.76	7	1	89.1	18	zwitterionic	7.3	4.7
Droperidol	548-73-2	n1(c2c(cccc2)[nH]c1=O)C=1CC[N@@](CCCC(c2ccc(F)cc2)=O)CC1	1.41	8.92		2.73	1.9	Gupta, Suneel K.; Southam, Mary; Hwang, Stephen. Pharmacokinetics of droperidol in healthy volunteers following intravenous infusion and rectal administration from an osmotic drug delivery module. Pharm. Res. 1992, 9, 694-696.	76 kg average weight. 125 ug/hr, N=8. VDss from clearance and MRT reported.		1963	379.43	5	1	58.1	6	cationic	3	0.54
Drotaverine	14009-24-6	CCOc1ccc(\C=C\2/NCCc3cc(OCC)c(OCC)cc23)cc1OCC	1.9	3.5	0.12	9	9.3	Bolaji OO, Onyeji CO, Ogundani AO, Olugbade TA, and Ogunbona FA (1996) Pharmacokinetics and bioavailability of drotaverine in humans. Eur. J. Drug Metab. Pharmacokinet. 21: 217-221. Vargay Z, Deutsch T, Szatmari I, Szuts T, Varkonyi P, Kerpel-Fronius S, and Eckhardt S (1984) The fate of drtoaverine-acephyllinate in rat and man II. Human pharmacokinetics of drotaverine-14C-acephyllinate. Eur. J. D…	VDss calculated from C vs t data obtained by digitization of the data provided in the reference.		1962	397.51	5	1	48.9	9	neutral	4.6	4.6
Duloxetine	116539-59-4	s1cccc1[C@@H](Oc1cccc2c1cccc2)CCNC		8.57	0.04		12	Found through Pharmapendium. FDA. PDF(395k) ANNEX I	VDss not reported. 70 kg assumed.		1988	297.41	2	1	21.3	6	cationic	4	2.5
DX-52-1	96251-59-1	c12[C@@H]([N@@]3[C@@H]([C@@H]4C[C@@H]([C@@H]([N@@]4C)[C@@H]3Cc1cccc2OC)C(=O)O)C#N)CO	0.23	3.06		1.23	1.52	Bunnell, Craig A.; Supko, Jeffrey G.; Eder, Joseph Paul, Jr.; Clark, Jeffrey W.; Lynch, Thomas J.; Kufe, Donald W.; Shulman, Lawrence N. Phase I clinical trial of 7-​cyanoquinocarcinol (DX-​52-​1) in adult patients with refractory solid malignancies. Cancer Chemotherapy and Pharmacology. 2001, 48, 347-355.	NSC607097. 1.73 m2/70 kg conversion factor used. VDss reported as 9.53 L/m2 and clearance 7.43 L/m2/h, in Table 4. N=12.		1984	357.4	7	2	97	4	anionic	-0.018	-3.2
DX9065a	150612-55-8	CC(=N)N1CC[C@@H](C1)Oc2ccc(cc2)[C@H](Cc3ccc4ccc(cc4c3)C(=N)N)C(=O)O	1.55	1.86		14.4	24.02	Tolerability, pharmacokinetics, and pharmacodynamics of DX-9065a, a new synthetic potent anticoagulant and specific factor Xa inhibitor, in healthy male volunteers. Nobuyuki Murayama, MS, Makoto Tanaka, PhD, Satoshi Kunitada, PhD, Hirohisa Yamada, MS, Takashi Inoue, MS, Yasuko Terada, BS, Masami Fujita, MD, Yasuo Ikeda, MD. CLINICAL PHARMACOLOGY & THERAPEUTICS, 1999, 66, 258-264.	Data for 24 patients (N=6/group) across 5, 10, 20 nd 30 mg doses. Median weight 61.7 kg reported. Structure and CAS number referring to free base.		1993	444.53	7	4	123.5	8	cationic	3.8	-1.3
E7107	630100-90-2	N1(CCN(CC1)C1CCCCCC1)C(=O)O[C@H]1C=C[C@@H]([C@H](OC(=O)C[C@@H](CC[C@@]1(C)O)O)C(=C\C=C\[C@](C[C@H]1O[C@@H]1[C@@H]([C@H](CC)O)C)(C)O)\C)C	10.1	47.9		3.5	9.2	Ferry A.L.M. Eskens, Francisco J. Ramos, Herman Burger, James P. O'Brien, Adelaida Piera, Maja J.A. de Jonge, Yoshiharu Mizui, Erik A.C. Wiemer, Maria Josepa Carreras, Jose Baselga, and Josep Tabernero. Phase I Pharmacokinetic and Pharmacodynamic Study of the First-in-Class Spliceosome Inhibitor E7107 in Patients with Advanced Solid Tumors. Clin Cancer Res 2013;19:6296-6304.	70 kg assumed. Weighted average of multiple doses on day (table 3). MRT fromVDss and clearance. Data generally comparable between day 1 and 15.		2003	718.96	11	4	152.5	11	cationic	5	4
E7974	610787-07-0	CC(C)[C@@H](\C=C(/C)\C(=O)O)N(C)C(=O)[C@@H](NC(=O)[C@H]1CCCCN1C(C)C)C(C)(C)C	1.26	0.97		21.5	17.5	A phase 1 trial of E7974 administered on day 1 of a 21-day cycle in patients with advanced solid tumors Rocha-Lima, Caio M.; Bayraktar, Soley; MacIntyre, Jessica; Raez, Luis; Flores, Aurea M.; Ferrell, Annapoorna; Rubin, Eric H.; Poplin, Elizabeth A.; Tan, Antoinette R.; Lucarelli, Antonio; Zojwalla, Naseem. Cancer (Hoboken, NJ, United States) 2012 , 118 (17), 4262-4270,	Analog of Hemiasterlin. N=27, weight-averaged values across doses (0.18-0.58 mg/2). 70 kg average weight used. Averages from table 3: VDss 88 L, Cl 4.09 L/h, t1/2 17.5 h MRT from VDss and Cl.		2003	437.62	7	2	89.9	8	anionic	4	1.4
Ecallantide	460738-38-9	N[C@@H](CCC(=O)O)C(N[C@H](C(N[C@H](C(N[C@H](C(N[C@H](C(N[C@H](C(N[C@@H]1C(N[C@H](C(N[C@H](C(N[C@H](C(N[C@H](C(N[C@H](C(N[C@H](C(NCC(N2[C@H](C(N[C@@H]3C(N[C@H](C(N[C@H](C(N[C@H](C(N[C@H](C(N4[C@H](C(N[C@H](C(N[C@H](C(N[C@H](C(N[C@H](C(N[C@H](C(N[C@H](C(N[C@H](C(N[C@H](C(N[C@H](C(N[C@H](C(N[C@@H]5C(N[C@H](C(N[C@H](C(N[C@H](C(N[C@H](C(N[C@H](C(NCC(NCC(N[C@H](C(N[C@H](C(NCC(N[C@H](C(N[C@H](C(N[C@H](C…	0.18	1.6		1.9	1.8	PP. FDA Approval Package. 2009-May-31 PDF(4025k) Clinical Pharmacology and Biopharmaceutics Review 125277/S-000 Part 01	N=24 across single dose and infusion times. 70 kg assumed. MRT from VDss and Cl.		2004	7061.89	179	101	2895.9	246	anionic	-9	-9
Edaravone	89-25-8	N1(c2ccccc2)N=C(C)CC1=O	0.23	1.42	0.89	2.65	2.36	Data from 20 mg dose iv profile shown in Fig. 2 of Hao Li,Kun Xu, Yongqing Wang, Hongwen Zhang, Tianping Li, Ling Meng, Xiaojian Gong, Haibo Zhang, Ning Ou and Jinman Ruan Phase I Clinical Study of Edaravone in Healthy Chinese Volunteers. Drugs RD 2012; 12 (2): 65-70.//ppb:Dao-quan Tang, Yin-jie Li, Zheng Li, Ting-ting Bian, Kai Chen, Xiao-xiao Zheng, Yan-yan Yu, Shui-shi Jiang. Study on the inte…	Data digitized. Only dose 20mg 0.5h iv infusion, N=10 (5 male/ 5 female, mean body weight = 59.7kg from Table 1) has been used (Dose linearity) Reported data (Table 2: AUC0-t: 3.64 mg*h/L AUC0-inf: 3.79 mg*h/mL CL: 0.1 L/min (1.68 mL/min/kg) t1/2: 2.34 h		1891	174.2	3	0	32.7	1	neutral	2.2	2.2
Edotecarin	174402-32-5	OCC(CO)NN1C(=O)c2c(C1=O)c3c4ccc(O)cc4n([C@@H]5O[C@H](CO)[C@@H](O)[C@H](O)[C@H]5O)c3c6[nH]c7cc(O)ccc7c26	1.45	25.3		0.95	4.01	Hurwitz, Herbert I.; Cohen, Roger B.; McGovren, J. Patrick; Hirawat, Samit; Petros, William P.; Natsumeda, Yutaka; Yoshinari, Tomoko. A phase I study of the safety and pharmacokinetics of edotecarin (J-107088), a novel topoisomerase I inhibitor, in patients with advanced solid tumors. Cancer Chemother. Pharmacol. 2007, 59, 139-147.	PF-804950. J-107088. N=9, 15 mg/m2 iv infusion over 2 h. 1.73 m2/70 kg assumed. Reported AUC(0-last) 200 ± 49.3 ng.h.mL-1; calculated 240 ng.h.mL-1. 20% difference, data accepted.		1995	608.55	15	10	241.2	6	anionic	-2.3	-2.8
Edoxaban	480449-70-5	c1(nc2c(s1)CN(CC2)C)C(=O)N[C@H]1[C@@H](NC(=O)C(=O)Nc2ncc(Cl)cc2)CC[C@H](C(=O)N(C)C)C1	1.53	5.19	0.5	4.91	6.7	Nobuko Matsushima, Frank Lee, Toshiyuki Sato, Daniel Weiss, and Jeanne Mendell. Bioavailability and Safety of the Factor Xa Inhibitor Edoxaban and the Effects of Quinidine in Healthy Subjects. Clinical Pharmacology in Drug Development, 2013, 2, 358–366//ppb: Ogata, Koichiro; Mendell-Harary, Jeanne; Tachibana, Masaya; Masumoto, Hiroshi; Oguma, Toshihiro; Kojima, Masazumi; Kunitada, Satoshi Clinica…	N=35, 30 mg via 30' inf. 70 kg average weight assumed. MRT from Clearance and VDss.		2003	548.06	11	3	136.6	6	neutral	1.5	1.3
Edrophonium	312-48-1	CC[N+](C)(C)c1cccc(O)c1	1.1	9.6		1.9	1.8	Morris RB, Cronnelly R, Miller RD, Stanski DR, and Fahey MR (1981) Pharmacokinetics of edrophonium and neostigmine when antagonizing d-tubocurarine neuromuscular blockade in man. Anesthesiol. 54: 399-402.			1950	166.24	2	1	20.2	2	neutral	-3.1	-3.2
Eletriptan	143322-58-1	CN1CCC[C@@H]1Cc2c[nH]c3ccc(CCS(=O)(=O)c4ccccc4)cc23	1.6	5.3	0.15	5	4.2	Milton AK, Scott NR, Allen MJ, Abel S, Jenkins VC, James GC, Rance DJ, and Eve MD (2002) Pharmacokinetics, pharmacodynamics, and safety of the 5-HT1B/1D agonist eletriptan following intravenous and oral administration. J. Clin. Pharmacol. 42: 528-539. Relpax Product Label.	VDss was calculated from C vs t data obtained by digitization of the plot (0.102 mg/kg dose only) included in the reference.		1992	382.52	4	1	53.2	6	cationic	3.7	2.2
Eliglustat	491833-29-5	CCCCCCCC(=O)N[C@H](CN1CCCC1)[C@@H](c2ccc3c(c2)OCCO3)O		20.95	0.21		7.7	CerdelgaTM, prescribing information. http://www.cerdelga.com/pdf/cerdelga_prescribing_information.pdf. Accessed December 8 2015.	88 L/h clearance reported in healthy human after 42 mg dose. T1/2 for EMs was 6.5 and for PMs it was 8.9. Median (7.7 h taken). 70 kg assumed. ppb 76 to 83%. a value of 0.21 was taken for fu (79% bound).The prescribing information states: After intravenous (IV) administration, the volume of distribution of eliglustat was 835 L in CYP2D6 EMs, suggesting wide distribution to tissues (CERDELGA is on…		2003	404.54	6	2	71	11	cationic	3.2	2.4
Elinafide	162706-37-8	C(CCNCCN1C(=O)c2c(ccc3ccccc23)C1=O)NCCN1C(=O)c2c(ccc3ccccc23)C1=O	12	5.7		35.2	52.6	Phase I and Pharmacokinetic Study of LU79553, a DNA Intercalating Bisnaphthalimide, in Patients With Solid Malignancies Miguel A. Villalona-Calero, Joseph P. Eder, Deborah L. Toppmeyer, Lee F. Allen, Robert Fram, Raja Velagapudi, Michael Myers, Anthony Amato, Kathleen Kagen-Hallet, Betty Razvillas, Donald W. Kufe, Daniel D. Von Hoff, and Eric K. Rowinsky. Journal of Clinical Oncology, 2001 19, 85…	LU79553. N=14 across doses ranging from 2 to 24 mg/m2/day.		1995	520.58	8	2	98.8	10	cationic	3.7	2.9
Elisidepsin	681272-30-0	CC[C@H](C)CCC(=O)N[C@H](C(C)C)C(=O)N[C@@H]([C@@H](C)O)C(=O)N[C@@H](C(C)C)C(=O)N[C@H](C(C)C)C(=O)N1CCC[C@@H]1C(=O)N[C@@H](CCCN)C(=O)N[C@H]([C@@H](C)CC)C(=O)N[C@@H]2[C@H](OC(=O)[C@@H](NC(=O)/C(=C/C)/NC(=O)[C@@H](NC(=O)[C@H](NC(=O)[C@H](NC2=O)[C@@H](C)CC)C(C)C)Cc3ccccc3)C(C)C)C	5.55	3.85		24.02	74.1	Salazar R, Jones RJ, Oaknin A, Crawford D, Cuadra C, Hopkins C, Gil M, Coronado C, Soto-Matos A, Cullell-Young M, Iglesias Dios JL, Evans TR. A phase I and pharmacokinetic study of elisidepsin (PM02734) in patients with advanced solid tumors. Cancer Chemother. Pharmacol. 2012, 70, 673-681	PM02734 (with CAS 915713-02-9 as TFA salt). Highly variable t1/2 from 1h to 135 h as dose increased to a 10 mg flat dose. FROM THE REFERENCE: No drug accumulation between cycles was found. Mean plasma CL was 14.2 l/h, mean Vss was 563 l, and mean t1/2 was 108 h. Inter-patient variability for CL, Vss, and t1/2 after the first infusion was 38, 84, and 55 %, respectively. Intra- patient variability …		2004	1477.87	30	14	442.1	33	cationic	5.8	3.4
Eltanolone	128-20-1	CC(=O)[C@H]1CC[C@H]2[C@@H]3CC[C@@H]4C[C@H](O)CC[C@]4(C)[C@H]3CC[C@]12C	2	22	0.01	1.5	4.7	Dale O, Hynne H, Parivar K, Johansson E, and Widman M. Pharmacokinetics of eltanolone in male and female patients following intravenous bolus injection. Acta Anaesthesiol. Scand. 1999, 43, 415-420.	Pregnanolone.		1937	318.49	2	1	37.3	1	neutral	4	4
Eltoprazine	98224-03-4	O1c2cccc(c2OCC1)N1CCNCC1	3.6	8		10.5	8.2	van Harten J, Mathlener IS, Raghoebar M. Pharmacokinetics of eltoprazine in healthy subjects. Drug Metabol Drug Interact. 1990;8(1-2):149-58.	N=20-22 (depending on data) across two doses of 3 and 8 mg. 1h infusion		1985	220.27	4	1	33.7	1	cationic	0.93	-0.46
Enalaprilat	76420-72-9	C[C@H](N[C@@H](CCc1ccccc1)C(=O)O)C(=O)N2CCC[C@H]2C(=O)O	0.38	1.6	0.62	4	39	Hockings N, Ajayi AA, and Reid JL (1986) Age and the pharmacokinetics of angiotensin converting enzyme inhibitors enalapril and enalaprilat. Br. J. Clin. Pharmacol. 21: 341-348. Mujais SK, Quintanilla A, Zahid M, Koch K, Shaw W, and Gibson T (1992) Renal handling of enalaprilat. Am. J. Kidney Dis. 19: 121-125.			1980	348.39	7	3	106.9	8	anionic	0.73	-3.4
Enalkiren	113082-98-7	C(CC(C)(N)C)(N[C@H](C(N[C@@H](Cc1c[nH]cn1)C(N[C@H]([C@H]([C@@H](O)CC(C)C)O)CC1CCCCC1)=O)=O)Cc1ccc(cc1)OC)=O	0.11	0.45	0.07	3.1	1.72	Gupta, SK; Granneman, GR; Boger, RS; Hollenberg, NK; Luther, RR. Simultaneous modeling of the pharmacokinetics and pharmacodynamic properties of enalkiren (Abbott-64662, a new renin inhibitor) I: single dose study. Drug Metab. Disp. 1992, 20, 821-825.ppb: Brian D. Dayton, Herman H. Stein, Jerome Cohen, William R. Baker, Steven A. Boyd, Stephen L. Condon, B. Gregory Donner, Anthony K. L. Fung, Jay…	Abbott-64662. N=16, 70 kg average weight reported. 90 minutes infusion. Average dose 15.32 mg. VDss from 7 subjects. Data taken from Table 1.		1979	656.86	12	7	191.7	18	cationic	2.5	0.16
Encainide	66778-36-7	COc1ccc(cc1)C(=O)Nc2ccccc2CCC3CCCCN3C	2.2	13	0.26	2.8	2.6	Wensing G, Monig H, Ohnhaus EE, and Hoensch HP (1991) Pharmacokinetics of encainide in patients with cirrhosis. Cardiovasc. Drugs Ther. 5: 733-740. C Funck-Brentano, J Turgeon, RL Woosley, and DM Roden (1989) Effect of low dose quinidine on encainide pharmacokinetics and pharmacodynamics. Influence of genetic polymorphism. Journal of Pharmacology and Experimental Therapeutics 249: 134-42. Jaillon…	EM data only from Funck-Bretano, et al. and Wensing et al. reports.		1972	352.47	4	1	41.6	6	cationic	4.7	3
Endralazine	39715-02-1	N\N=C\1/NN=C2CCN(CC2=C1)C(=O)c3ccccc3	2.2	13		2.7	5.6	Reece PA, Cozamanis I, and Zacest R (1983) Endralazine - a new hydralazine-like antihypertensive with high systemic bioavailability. Eur. J. Clin. Pharmacol. 25: 553-556.			1972	269.3	6	2	83.1	1	cationic	1.9	1.9
Enfuvirtide	159519-65-0	CC[C@H](C)[C@@H](C(=O)N[C@@H](CCC(=O)O)C(=O)N[C@@H](CCC(=O)O)C(=O)N[C@@H](CO)C(=O)N[C@@H](CCC(=O)N)C(=O)N[C@@H](CC(=O)N)C(=O)N[C@@H](CCC(=O)N)C(=O)N[C@@H](CCC(=O)N)C(=O)N[C@@H](CCC(=O)O)C(=O)N[C@@H](CCCCN)C(=O)N[C@@H](CC(=O)N)C(=O)N[C@@H](CCC(=O)O)C(=O)N[C@@H](CCC(=O)N)C(=O)N[C@@H](CCC(=O)O)C(=O)N[C@@H](CC(C)C)C(=O)N[C@@H](CC(C)C)C(=O)N[C@@H](CCC(=O)O)C(=O)N[C@@H](CC(C)C)C(=O)N[C@@H](CC(=O)O)C(=O…	0.07	0.36	0.08	3.2	4	PP data. 2003-Mar-27 PDF(1771k) Clinical Pharmacology and Biopharmaceutics Review 021481/S-000 Part 01	70 kg assumed. MRT from VDss and Cl. T 1/2 reported < 4 h.		1994	4491.88	115	63	1902.9	151	anionic	-9	-9
Eniporide	176644-21-6	Cc1cc(c(cc1C(=O)NC(=N)N)S(=O)(=O)C)n2cccc2	1.1	8.2		2.3	2.2	Kovar A, Peters T, Beier N, and Derendorf H (2001) Pharmacokinetic/pharmacodynamic evaluation of the NHE inhibitor Eniporide. J. Clin. Pharmacol. 41: 139-148.			1996	320.37	7	3	118	4	neutral	0.4	0.24
Enoxacin	74011-58-8	CCN1C=C(C(=O)O)C(=O)c2cc(F)c(nc12)N3CCNCC3	2	5.4	0.8	6.2	5.1	Nix DE, Lebsack ME, Chapelsky M, Sedman AJ, Busch J, and Norman A (1993) Effect of oral antacids on disposition of intravenous enoxacin. Antimic. Agents Chemother. 37: 775-777. Wise R, Lister D, McNulty CAM, Griggs D, and Andrews JM (1986) The comparative pharmacokinetics and tissue penetration of four quinolones including intravenously administered enoxacin. Infection 14: S196-S202. Bergogne-Ber…			1980	320.32	7	2	85.8	3	zwitterionic	1.4	-1.1
Enoximone	77671-31-9	c1(C(c2ccc(SC)cc2)=O)c([nH]c([nH]1)=O)C	1.48	19.1	0.3	1.33	1.94	SHlGEMlCHl MORITA, YONElCHl SAWAI, JOEL F . HEEG, YUlCHl KOIKE. Pharmacokinetics of Enoximone after Various Intravenous Administrations to Healthy Volunteers. J. Pharm. Sci. 1995, 84, 152-157. Data averaged with Alken RG, Belz GG, Haegele KD, Meinicke T, and Schechter PJ (1984) Kinetics of fenoximone, a new cardiotonic, in healthy subjects. Clin. Pharmacol. Ther. 36: 209-216. Hook RH, Boxenbaum H…	doses from 0.25 mg/kg to 2 mg/kg N=6 for each dose. Data as average across doses. Fenoximone, same compound. Data weight-averaged. Enoximone kept		1980	248.3	4	2	65.7	3	neutral	1.3	1.3
Enprofylline	41078-02-8	CCCN1C(=O)NC(=O)c2nc[nH]c12	0.63	4	0.55	2.6	1.8	Lunell E, Borga O, and Alarsson R (1984) Pharmacokinetics of enprofylline in patients with impaired renal function after a single intravenous dose. Eur. J. Clin. Pharmacol. 26: 87-93. Kraan J, Borgstrom L, Koeter GH, Laseur M, Jonkman JHG, and deNoord OE (1988) Creation of four consecutive intantaneous steady-state plasma concentration plateaus of theophylline and enprofylline by repeated infusio…			1973	194.19	6	2	78.1	2	anionic	-0.075	-1.4
Entacapone	130929-57-6	CCN(CC)C(=O)\C(=C\c1cc(O)c(O)c(c1)N(=O)=O)\C#N	0.27	12	0.02	0.38	2.4	Heikkinen H, Saraheimo M, Antila S, Ottoila P, and Pentikainen PJ (2001) Pharmacokinetics of entacapone, a peripherally acting catechol-O-methyltransferase inhibitor, in man. A study using a stable isotope technique. Eur. J. Clin. Pharmacol. 56: 821-826. Najib J (2001) Entacapone: a catechol-O-methyltransferase inhibitor for the adjunctive treatment of parkinson's disease. Clin. Ther. 23: 802-832.			1988	305.29	8	2	130.4	6	anionic	1.6	-0.08
Epiroprim	73090-70-7	c1ccn(c2c(cc(Cc3c(nc(nc3)N)N)cc2OCC)OCC)c1	2.5	3.5	0.12		9.4	OLIVIER LUTTRINGER, FRANK-PETER THEIL, PATRICK POULIN, ANNE H. SCHMITT-HOFFMANN, THEODOR WALTER GUENTERT, THIERRY LAVE´ Physiologically Based Pharmacokinetic (PBPK) Modeling of Disposition of Epiroprim in Humans. J. Pharm. Sci. 2003, 92, 1990-2007	MRT from VDss and clearance. N=4, 100 mg dose.		1980	353.42	7	2	101.2	7	neutral	3	2.9
Epirubicin	56420-45-2	COc1cccc2C(=O)c3c(O)c4C[C@](O)(C[C@H](O[C@H]5C[C@H](N)[C@@H](O)[C@H](C)O5)c4c(O)c3C(=O)c12)C(=O)CO	45	20	0.25	38	36	Carmaggi CM, Comparsi R, Strocchi E, Testoni F, Angelli B, and Pannuti F (1988) Epirubicin and doxorubicin comparative metabolism and pharmacokinetics. Canc. Chemother. Pharmacol. 21: 221-228. Carmaggi CM, Strocchi E, Martoni A, Angelelli B, Comparsi R, anmd Pannuti F (1985) Epirubicin plasma and blood pharmacokinetics after single i.v. bolus in advanced cancer patients. Drugs Exptl. Clin. Res. 1…			1975	543.52	12	6	206.1	5	cationic	0.46	-2.2
Epothilone folate	958646-17-8	Cc1nc(cs1)/C=C(\C)/[C@@H]2C[C@H]3[C@H](N3CCOC(=O)OCCSSC[C@@H](C(=O)O)NC(=O)[C@H](CC(=O)O)NC(=O)[C@H](CCCNC(=N)N)NC(=O)[C@H](CC(=O)O)NC(=O)CC[C@@H](C(=O)O)NC(=O)c4ccc(cc4)NCc5c[nH]c-6nc(nc(=O)c6n5)N)CCC[C@@H]([C@@H]([C@H](C(=O)C([C@H](CC(=O)O2)O)(C)C)C)O)C	0.09	2.46		0.6	0.5	P. P. Peethambaram, L. C. Hartmann, D. J. Jonker , M. de Jonge, E. R. Plummer, L. Martin, J. Konner, J. Marshall, G. D. Goss, V. Teslenko, P. L. Clemens, L. J. Cohen, C. M. Ahlers, L. Alland. A phase I pharmacokinetic and safety analysis of epothilone folate (BMS-753493), a folate receptor targeted chemotherapeutic agentin humans with advanced solid tumors.Invest New Drugs (2015) 33:321–331	BMS-743593. Data digitized from plot reported for Day 4. N=6, 17 mg dose, iv bolus. No accumulation on Day 4 vs. day 1. Roughly linear from 10 mg to 33 mg dose. AUCinf 16% larger than reported (1648 vs. 1422 ng.hr.mL-1). Reported %CV 32%. 70 kg assumed.		2007	1569.74	38	17	601.4	39	anionic	-1.9	-9
Epristeride	119169-78-7	CC(C)(C)NC(=O)[C@H]1CC[C@H]2[C@@H]3CC=C4C=C(CC[C@]4(C)[C@H]3CC[C@]12C)C(=O)O	0.54	0.33	0.03	27	27	Benincosa LJ, Audet PR, Lundberg D, Zariffa N, and Jorkasky DK (1996) Pharmacokinetics and absolute bioavailability of epristeride in healthy male subjects. Biopharm, Drug Dispos. 17: 249-258. Li JT, Zheng Z, and Jin J (2000) Pharmacokinetics of epristeride in healthy male volunteers. Zhongguo Linchuang Yaolixue Zazhi 16: 424-428.			1988	399.57	4	2	66.4	2	anionic	4.8	2.2
Eprosartan	133040-01-4	CCCCc1ncc(\C=C(/Cc2cccs2)\C(=O)O)n1Cc3ccc(cc3)C(=O)O	0.17	1.9	0.017	1.5	2.1	Tenero D, Martin D, Ilson B, Jushchyshyn J, Boike S, Lundberg D, Zariffa N, Boyle D, Jorkasky D (1998) Pharmacokinetics of intravenously and orally administered eprosartan in healthy males: absolute bioavailability and effect of food. Biopharm. Drug Dispos. 19: 351-356. Kovacs SJ, Tenero DM, Martin DE, Ilson BE, and Jorkasky DK (1999) Pharmacokinetics and protein binding of eprosartan in hemodial…			1990	424.51	6	2	92.4	10	anionic	4.4	-1.1
Eptaloprost	90693-76-8	[H]OC(CCCOCC=C1C[C@H]2C[C@H]([C@@H](C#C[C@H]([C@@H](C)CC#CCC)O[H])[C@H]2C1)O[H])=O	2.4	66.2		0.59	0.41	Hildebrand M, Inter-species Extrapolation of Pharmacokinetic Data of Three Procyclin-Mimetics, Prostaglandins, 1994, 48, 297-312.	t1/2=0.693/kel. Data reported and used for allometric scaling were taken from other publications by the same author.		1984	402.52	5	3	87	15	anionic	3	0.22
Eptifibatide	188627-80-7	NC(=N)NCCCC[C@@H]1NC(=O)CCSSC[C@H](NC(=O)[C@@H]2CCCN2C(=O)C(Cc3c[nH]c4ccccc34)NC(=O)[C@H](CC(=O)O)NC(=O)CNC1=O)C(=O)N	0.17	1.2	0.75	2.4	4.2	Gretler D, Guerciolini R, and Williams PJ (2004) Pharmacokinetic and pharmacodynamic properties of eptifibatide in subjects with normal or impaired renal function. Clin. Ther. 26: 390-398. Integrilin Product Label.			1993	831.96	20	11	323.9	11	zwitterionic	-3.2	-5.5
Eravacycline	1207283-85-9	CN(C)[C@H]1[C@@H]2C[C@@H]3Cc4c(cc(c(c4C(=O)C3=C([C@@]2(C(=O)C(=C1O)C(=O)N)O)O)O)NC(=O)CN5CCCC5)F	2.3	3.71	0.18	10.3		Kevin P. Connors, Seth T. Housman, J. Samuel Pope, John Russomanno, Edward Salerno, Eric Shore, Susan Redican, David P. Nicolau. Phase I, Open-Label, Safety and Pharmacokinetic Study To Assess Bronchopulmonary Disposition of Intravenous Eravacycline in Healthy Men and Women. Antimicrobial Agents and Chemotherapy, 2014, 58 (4), 2113–2118.	N=20, 80 kg average weight reported. Footnote from table 1: Eravacycline was administered at 1.0 mg/kg every 12 h for seven doses. MRT from VDss and clearance. T1/2 not reported.		2010	558.56	12	6	193.7	5	cationic	0.3	-3.9
Ergotamine	113-15-5	CN1C[C@@H](C=C2[C@H]1Cc3c[nH]c4cccc2c34)C(=O)N[C@]5(C)O[C@@]6(O)[C@@H]7CCCN7C(=O)[C@H](Cc8ccccc8)N6C5=O	3.6	15	0.02	4	2.1	Ibraheem JJ, Paalzow L, and Tfelt-Hansen P (1985) Linear pharmacokinetics of intravenous ergotamine tartrate. Eur. J. Clin. Pharmacol. 29: 61-66.	VDss calculated from compartmental parameters provided in the reference.		1920	581.66	10	3	118.2	4	neutral	3.6	3.5
Eribulin	253128-41-5	NC[C@@H](O)C[C@H]5O[C@H]4C[C@H]9O[C@@H](CC[C@@H]1O[C@H](CC1=C)CC[C@@]32O[C@@H]6[C@@H]8O[C@H](C2)[C@H](O3)[C@@H]8O[C@H]7CC[C@H](CC(=O)O[C@@H]4[C@H]5OC)O[C@H]67)C[C@@H](C)C9=C	1.46	0.75	0.43	32.5	37.8	A Phase I Study of EribulinMesylate (E7389), a Mechanistically Novel Inhibitor of Microtubule Dynamics, in Patients with Advanced SolidMalignancies Sanjay Goel, Alain C.Mita, MonicaMita, Eric K. Rowinsky, Quincy S. Chu, NancyWong, Christopher Desjardins, FangF ang, Mendel Jansen, Dale E. Shuster,SridharMani,and Chris H.Takimoto. Clin Cancer Res 2009;15:4207-. ppb: The PDr reports: The human plasm…	E 7389. 0.25-1.4 mg/m2, 1.73m2/70kg conversion factor. Total number of patients 31. Weighted average		1999	731.87	13	2	155.6	4	cationic	2.1	0.36
Eritoran	185955-34-4	CCCCCCCCCCCC(=O)CC(=O)N[C@H]1[C@@H](OP(=O)(O)O)O[C@H](CO[C@@H]2O[C@H](COC)[C@@H](OP(=O)(O)O)[C@H](OCC[C@@H](CCCCCCC)OC)[C@H]2NC(=O)CCCCCCCCC\C=C/CCCCCC)[C@@H](O)[C@@H]1OCCCCCCCCCC	0.048	0.013		62	51	Wong YN, Rossignol D, Rose JR, Kao R, Carter A, and Lynn M (2003) Safety, pharmacokinetics, and pharmacodynamics of E5564, a lipid A antagonist, during an ascending single-dose clinical study. J. Clin. Pharmacol. 43: 735-742. Rossignol DP, Wasan KM, Choo E Yau E, Wong N, Rose J, Moran J, and Lynn M (2004) Safety, pharmacokinetics, pharmacodynamics, and plasma lipoprotein distribution of eritoran …	Protein binding driven by lipoproteins--not reported directly		1996	1313.66	21	7	293.6	59	anionic	9	1.7
Erlotinib	183321-74-6	n1cnc(c2cc(c(cc12)OCCOC)OCCOC)Nc1cc(ccc1)C#C	0.77	1.69	0.07	7.55	6.5	A phase I dose-escalation and bioavailability study of oral and intravenous formulations of erlotinib (Tarceva®, OSI-774) in patients with advanced solid tumors of epithelial origin M. Ranson · H. Shaw · J. Wolf · M. Hamilton ·S. McCarthy · E. Dean · A. Reid · I. Judson. Cancer Chemother Pharmacol (2010) 66:53–58. ppb; The PDR states: Following absorption, erlotinib is approximately 93% protein b…	Data weighted across 25, 50 and 75 mg infusion doses. Median data reported and used.		1996	393.44	7	1	74.7	11	neutral	3.8	3.8
Ertapenem	153832-46-3	C[C@@H](O)[C@@H]1[C@H]2[C@@H](C)C(=C(N2C1=O)C(=O)O)S[C@@H]3CN[C@@H](C3)C(=O)Nc4cccc(c4)C(=O)O	0.12	0.45	0.1	4.4	3.8	Majumdar AK, Musson DG, Birk KL, Kitchen CJ, Holland S, McCrea J, Mistry G, Hesney M, Xi L, Li SX, Haesen R, Blum RA, Lins RL, Greenberg H, Waldman S, Deutsch P, and Rogers JD (2002) Pharmacokinetics of ertapenem in healthy young volunteers. Antimic. Agents Chemother. 46: 3506-3511.	Protein binding non-linear over the concentration range studied in vivo; median value used.		1993	475.51	10	5	156.3	7	anionic	0.43	-4.8
Erythromycin	114-07-8	CC[C@H]1OC(=O)[C@H](C)[C@@H](O[C@H]2C[C@@](C)(OC)[C@@H](O)[C@H](C)O2)[C@H](C)[C@@H](O[C@@H]3O[C@H](C)C[C@@H]([C@H]3O)N(C)C)[C@](C)(O)C[C@@H](C)C(=O)[C@H](C)[C@@H](O)[C@]1(C)O	0.95	5.6	0.1	2.8	2	Welling, PG; Craig, WA. Pharmacokinetics of Intravenous Erythromycin. Journal of phermaceutical Sciences 1978, 67(8), 1057-1059.			1951	733.93	14	5	193.9	7	cationic	1.8	0.47
Escin Ia	123748-68-5	C(O)[C@@]12[C@H](C3=CC[C@H]4[C@@]([C@@]3(C[C@H]2O)C)(C)CC[C@@H]2[C@]4(C)CC[C@@H]([C@@]2(CO)C)O[C@H]2[C@H](O[C@@H]3O[C@H](CO)[C@H]([C@@H]([C@H]3O)O)O)[C@@H](O)[C@@H]([C@H](O2)C(=O)O)O[C@@H]2O[C@H](CO)[C@H]([C@@H]([C@H]2O)O)O)CC([C@H]([C@@H]1OC(=O)C)OC(=O)/C(=C/C)/C)(C)C	0.28	1.65		2.85	2.4	A liquid chromatography–tandem mass spectrometry method for the simultaneous quantification of escin Ia and escin Ib in human plasma: application to a pharmacokinetic study after intravenous administration. Lidong Liu, Xiujun Wu,Dan Wu, Yingwu Wang, Pengfei Li, Yantong Sun, Yan Yang, Jingkai Gua and Yimin Cui. Biomed. Chromatogr. 2010; 24: 1309–1315	Data digitized from plots reported. 3 mg dose. N=10 70 kg average weight assumed.		1989	1131.26	24	13	388	16	anionic	-1.2	-4.5
Escin Ib	26339-90-2	C(O)[C@@]12[C@H](C3=CC[C@H]4[C@@]([C@@]3(C[C@H]2O)C)(C)CC[C@@H]2[C@]4(C)CC[C@@H]([C@@]2(CO)C)O[C@H]2[C@H](O[C@@H]3O[C@H](CO)[C@H]([C@@H]([C@H]3O)O)O)[C@@H](O)[C@@H]([C@H](O2)C(=O)O)O[C@@H]2O[C@H](CO)[C@H]([C@@H]([C@H]2O)O)O)CC([C@H]([C@@H]1OC(=O)C)OC(=O)/C(=C\C)/C)(C)C	0.23	2.55		1.5	1.8	A liquid chromatography–tandem mass spectrometry method for the simultaneous quantification of escin Ia and escin Ib in human plasma: application to a pharmacokinetic study after intravenous administration. Lidong Liu, Xiujun Wu,Dan Wu, Yingwu Wang, Pengfei Li, Yantong Sun, Yan Yang, Jingkai Gua and Yimin Cui. Biomed. Chromatogr. 2010; 24: 1309–1315	Data digitized from plots reported. 2 mg dose reported. Clearance not corresponding to calculated while AUC within 10%. N=10 70 kg average weight assumed.		1989	1131.26	24	13	388	16	anionic	-1.2	-4.5
Esmolol	81147-92-4	COC(=O)CCc1ccc(OCC(O)CNC(C)C)cc1	1.2	290	0.59	0.07	0.15	Sum CY, Yacobi A, Kartzinel R, Stampfli H, Davis CS, and Lai CM (1983) Kinetics of esmolol, an ultra-short-acting beta blocker, and of its major metabolite. Clin. Pharmacol. Ther. 34: 427-434. Okamura M, Kumagai M, Murasaki Y, Ohkura T, Miyamoto Y, Kawai Y, Tamura T, Takariki Y, and Tomisawa H (2001) Stereoselective pharmacokinetics of esmolol enantiomers. Yakubutsu Dotai 16: 427-435.			1981	295.37	5	2	67.8	10	cationic	2	0.18
Esomeprazole	119141-88-7	c12c([nH]c(n1)[S@@](Cc1c(c(c(C)cn1)OC)C)=O)ccc(c2)OC	0.2	3.85	0.03	0.9	0.83	PP. FDA approval package. 2004-Jun-18 PDF(2708k) Clinical Pharmacology and Biopharmaceutics Review 021689/S-000	MRT from VDss and Cl. 70 kg assumed.	Following single-dose oral administration of omeprazole, the majority of the dose (about 77%) is eliminated in urine as at least six metabolites. FIRST PASS.	1988	345.42	6	1	77.1	5	neutral	2.2	2.2
Estradiol	50-28-2	C[C@]12CC[C@H]3[C@@H](CCc4cc(O)ccc34)[C@@H]1CC[C@@H]2O	1.2	30	0.016	0.7	1.7	Kuhnz W, Gansau C, and Mahler M (1993) Pharmacokinetics of estradiol, free and total estrone, in young women following single intravenous and oral administration of 17beta estradiol. Arz. Forsch. 43: 966-973. Bruning PF and Bonfrer JMG (1986) Free fatty acid concentrations correlated with the available fraction of estradiol in human plasma. Cancer Res. 46: 2606-2609.			1946	272.38	2	2	40.5	0	neutral	3.7	3.7
Estramustine phosphate	4891-15-0	C[C@]12CC[C@H]3[C@@H](CCc4cc(OC(=O)N(CCCl)CCCl)ccc34)[C@@H]1CC[C@@H]2OP(=O)(O)O	0.12	0.94	0.5	2.1	2.4	Hudes G, Haas N, Yeslow G, Gillon T, Gunnarsson PO, Ellman M, Nordle O, Eriksson B, Miller L, Cisar L, Kopreski M, Viaro D, and Hartley-Asp B (2002) Phase I clinical and pharmacologic trial of intravenous estramustine phosphate. J. Clin. Oncol. 20: 1115-1127. Gunnarsson PO, Andersson SB, Johansson SA, Nilsson T, and Plym-Forshell G (1984) Pharmacokinetics of estramustine phosphate (Estracyt) in p…	Compartmental model parameters from Gunnarsson, et al. were used in the calculation of VDss.		1964	520.38	7	2	96.3	8	anionic	5	1
Ethacrynic Acid	58-54-8	CCC(=C)C(=O)c1ccc(OCC(=O)O)c(Cl)c1Cl	0.26	8.7		0.5	0.5	Lacreta FP, Brennan JM, Nash SL, Comis RL, Tew KD, and O'Dwyer P (1994) Pharmacokinetics and bioavailability study of ethacrynic acid as a modulator of drug resistance in patients with cancer. J. Pharmacol. Exp. Ther. 270: 1186-1191.	Edecrin		1962	303.14	4	1	63.6	6	anionic	2.8	-0.46
Ethambutol	74-55-5	CC[C@@H](CO)NCCN[C@@H](CC)CO	1.7	10	0.18	2.7	3.1	Lee CS Brater DC, Gambertoglio JG, and Benet LZ (1980) Disposition kinetics of ethambutol in man. J. Pharmacokinet. Biopharm. 8: 335-346. Holdiness MR (1984) Clinical pharmacokinetics of the antituberculosis drugs. Clin. Pharmacokinet. 9: 511-544.			1961	204.31	4	4	64.5	9	cationic	-0.38	-2.5
Ethimizol	64-99-3	c1(c(ncn1CC)C(NC)=O)C(NC)=O	0.73	12.1	0.92	1	0.83	Trnovec T; Soltes L; Durisova M; Kallay Z; Koprda V; Piotrovskii L B Pharmacokinetics of ethimizol in man. Die Pharmazie (1985), 40(6), 410-1	N=5, dose 1 mg infusion, average weight reported 69.2 kg. ppb linear across two orders of magnitude concentration ~ 10-7 to 10-9 M)		1961	210.23	6	2	76	3	neutral	-0.55	-0.55
Ethinylestradiol	57-63-6	C[C@]12CC[C@H]3[C@@H](CCc4cc(O)ccc34)[C@@H]1CC[C@@]2(O)C#C	4.3	7	0.014	11	9.7	Kuhnz W, Humpel M, Biere H, and Gross D (1996) Influence of repeated oral doses of ethinyloestradiol on the metabolic disposition of [13C2]-ethinyloestradiol in young women. Eur. J. Clin. Pharmacol. 50: 231-235. Kuhnz W, Pfeffer M, and Al-Yacoub G (1990) Protein binding of the contraceptive steroids gestodene, 3-keto-desogestrel and ethinylestradiol in human serum. J. Ster. Biochem. 35: 313-318. …			1937	296.4	2	2	40.5	1	neutral	3.5	3.5
Ethinylestradiol-17-Sulfate	75803-36-0	C[C@]12CC[C@H]3[C@@H](CCc4cc(O)ccc34)[C@@H]1CC[C@@]2(OS(=O)(=O)O)C#C	0.61	1.3		7.8	9.3	Goldzieber JW, Mileikowsky G, Newburger J, Dorantes A, and Stavchansky SA (1988) Human pharmacokinetics of ethinyl estradiol 3-sulfate and 17-sulfate. Steroids 51: 63-79.	VDss calculated from reported micro-constants.		1980	376.47	5	2	83.8	3	anionic	1.9	1.8
Ethinylestradiol-3-Sulfate	24560-70-1	C[C@]12CC[C@H]3[C@@H](CCc4cc(OS(=O)(=O)O)ccc34)[C@@H]1CC[C@@]2(O)C#C	2.3	4.7	0.011	8.2	8.4	Goldzieber JW, Mileikowsky G, Newburger J, Dorantes A, and Stavchansky SA (1988) Human pharmacokinetics of ethinyl estradiol 3-sulfate and 17-sulfate. Steroids 51: 63-79. Reed MJ and Fotherby K (1980) Interaction of ethinyloestradiol sulphate with plasma proteins. J. Steroid Biochem. 13: 495-497.	VDss calculated from reported micro-constants.		1969	376.47	5	2	83.8	3	neutral	1.6	-1.9
Etilefrine	709-55-7	CCNCC(O)c1cccc(O)c1	2.1	14	0.77	2.5	2.2	Hengstmann JH, Weyand U, and Dengler HJ (1975) The physiological disposition of etilefrine in man. Eur. J. Clin. Pharmacol. 9: 179-187.	VDss calculated from reported micro-constants.		1950	181.23	3	3	52.5	4	cationic	0.57	-0.9
Etomidate	33125-97-2	CCOC(=O)c1cncn1[C@H](C)c2ccccc2	2.7	13	0.23	2.9	3.5	Van hamme MJ, Ghoneim MM, and Ambre JJ (1978) Pharmacokinetics of etomidate, a new intravenous anesthetic. Anesthesiology 49: 274-277. de Ruiter G, Popescu DT, deBoer AG, Smeekens JB, Breimer DD (1981) Pharmacokinetics of etomidate in surgical patients. Arch. Int. Pharmacodynam. Ther. 249: 180-188. Meuldermans WEG and Heykants JJP (1976) The plasma protein binding and distribution of etomidate in…	Microconstant values from Van Hamme, et al., were used to estimate VDss. Data were combined with deRuyter et al.		1884	244.29	4	0	44.1	5	neutral	2.8	2.8
Etonogestrel	54048-10-1	[C@@]12([C@H]([C@H]3[C@H](C(=C)C2)[C@@H]2C(=CC(=O)CC2)CC3)CC[C@]1(C#C)O)CC	2.87	2	0.02	23.6	25	PP. FDA approval package. 2006-Jun-16 PDF(2755k) Clinical Pharmacology and Biopharmaceutics Review 021529/S-000	Vdss reported with large s.d. 201 +/- 149 L. MRT from VDss and Cl. 70 kg assumed.150 ug low bolud dose		1974	324.46	2	1	37.3	2	neutral	4	4
Etoposide	33419-42-0	COc1cc(cc(OC)c1O)[C@H]2[C@@H]3[C@H](COC3=O)[C@H](O[C@@H]4O[C@@H]5CO[C@@H](C)O[C@H]5[C@H](O)[C@H]4O)c6cc7OCOc7cc26	0.18	0.5	0.12	6	5.7	Pfluger KH, Schmidt L, Merkel M, Jungelas H, and Havemann K (1987) Drug monitoring of etoposide (VP16-213). Canc. Chemother. Pharmacol. 20: 59-66. Kaul S, Igwemezie LN, Stewart DJ, Fields SZ, Kosty M, Levithan N, Bukowski R, Gandara D, Goss G, et al. (1995) Pharmacokinetics and bioequivalence of etoposide following intravenous administration of etoposide phosphate and etoposide in patients with s…			1946	588.56	13	3	160.8	5	neutral	-0.43	-0.43
Etoricoxib	202409-33-4	Cc1ccc(cn1)c2ncc(Cl)cc2c3ccc(cc3)S(=O)(=O)C	1.5	0.79	0.081	32	26	Rodrigues AD, Halpin RA, Geer LA, Cui D, Woolf EJ, Matthews CZ, Gottesdiener KM, Larson PJ, Lasseter KC, and Agrawal NGB (2003) Absorption, metabolism, and excretion of etoricoxib, a potent and selective cyclooxygenase-2 inhibitor, in healthy male volunteers. Drug Metab. Dispos. 31: 224-232. Agrawal NGB, Rose MJ, Matthews CZ, Woolf EJ, Porras AG, Geer LA, Larson PJ, Cote J, Dilzer SC, Lasseter KC…			1998	358.84	4	0	59.9	3	neutral	3.5	3.5
Evacetrapib	1186486-62-3	Cc1cc(C)c2N(C[C@@H]3CC[C@H](CC3)C(=O)O)CCC[C@H](N(Cc4cc(cc(c4)C(F)(F)F)C(F)(F)F)c5nnn(C)n5)c2c1	1.82	0.84	0.001	36.15	51.94	Ellen A. Cannady, Aktham Aburub,Chris Ward, Chris Hinds Boris Czeskis, Kenneth Ruterbories, Jeffrey G. Suico, Jane Royalty Demetrio Ortega, Brian W. Pack, Syed L. Begum, William F. Annes, Qun Lin, and David S. Small. Absolute bioavailability of evacetrapib in healthy subjects determined by simultaneous administration of oral evacetrapib and intravenous [13C8]-evacetrapib as a tracer. J. Label Com…	LY 2484595. N=8, 7M/1F, 74.6 kg average weight, 175 ug of 13-C8 tracer as a 4 hr infusion. Data digitized from plot reported and PK parameters calculated via PKSolver. Reported normalized AUC(0-inf): 248 ng.h.mL-1.mg-1; calculated normalized AUC(0-inf): 266.02 ng.h.mL-1.mg-1. 7% difference.		2010	638.65	8	1	87.4	7	zwitterionic	7.5	5.2
Exatecan (acid)	276680-63-8	O1C([C@@](c2cc3n(c(c2C1)=O)Cc1c2c4c(cc(c(c4CC[C@@H]2N)C)F)nc31)(CC)O)=O	0.44	0.96		7.6	6.7	Royce ME, Rowinsky EK, Hoff PM, Coyle J, DeJager R, Pazdur R, and Saltz LB (2004) A phase II study of intravenous exatecan mesylate (DX-8951f) administered daily for five days every three weeks to patiets with metastatic adenocarcinoma of the colon or rectum. Invest. New Drugs 22: 53-61.	PK data are for ring-opened acid form		2000	435.45	7	2	107.4	1	neutral	2	1.7
Ezogabine	150812-12-7	C(Nc1c(cc(NCc2ccc(F)cc2)cc1)N)(=O)OCC	2.5	8.3	0.2	5	9	http://www.accessdata.fda.gov/drugsatfda_docs/label/2011/022345s000lbl.pdf. accessed March 13 2012.http://www.pdr3d.com/detail.php?c=126688#section-15 ppb: the PDR states: Data from in vitro studies indicate that ezogabine and NAMR are approximately 80% and 45% bound to plasma protein, respectively. (NAMR is a metabolite). Accessed December 31 2014. http://www.pdr3d.com/detail.php?c=126688#sectio…			1993	303.33	5	3	76.4	6	neutral	3.1	3.1
F992	162277-99-8	O=C([C@H](CSCCCC(N[C@@H](C1=O)CC2=CC=CC=C2)=O)NC([C@@H](NC([C@@](C)(NC([C@@H](N1)CC3=CC=CS3)=O)CC)=O)CC(N)=O)=O)N(C[C@H](O)C4)[C@@H]4C(N[C@@H](C(NCC(N)=O)=O)CCCNC(N)=N)=O	0.31	0.87		5.63	4.28	T. Callréus, J. Lundahl, A. Broeders, P. Höglund. Pharmacokinetics and antidiuretic effect of a new vasopressin analogue (F992) in overhydrated male volunteers. Eur J Clin Pharmacol (1999) 55: 293-298.	Average of data reported in Table 1. 4 and 8 ug dose (N=8 in each case). Average weight 76.3		1995	1028.21	24	13	392.3	18	cationic	-2.9	-6
Falipamil	77862-92-1	C1(c2cc(c(OC)cc2CN1CCC[N@@](CCc1cc(c(cc1)OC)OC)C)OC)=O	2.4	15.71	0.12	2.62	2.04	Roth, W.; Koss, F. W.; Hallinan, D.; Lambe, R.; Darragh, A.. Pharmacokinetics of falipamil after intravenous administration to humans. J. Pharm. Sci. 1990, 79, 415-419.	N=6 but complete data in table available for N=5. 100 mg dose. Data for parent. 67 kg as median weight taken from range.		1981	428.52	7	0	60.5	11	cationic	3	2.3
Famotidine	76824-35-6	NC(=N)Nc1nc(CSCCC(=N)NS(=O)(=O)N)cs1	1.2	6.6	0.84	3	2.8	Yeh KC, Chremos AN, Lin JH, Constanzer ML, Kanovsky SM, Hucker HB, Antonello J, Vlasses P, Ryan JR, and Williams RL (1987) Single-dose pharmacokinetics and bioavailability of famotidine in man. Results of multicenter collaborative studies. Biopharm. Drug Dispos. 8: 549-560.	VDss calculated from C vs t data obtained by digitization of the plots provided in the reference.		1980	337.45	9	6	170.8	9	neutral	-1.3	-1.4
Faropenem	106560-14-9	C(=O)(O)C1=C(S[C@H]2N1C(=O)[C@@H]2[C@@H](C)O)[C@H]1CCCO1	0.18	2.23		1.34	1.4	Pharmacokinetics of faropenem after multiple intravenous infusion administration in Chinese healthy volunteersSU K e- jian, SUN L,i YANG Juan, LIU Jin Chinese Journal of Clinical Pharmacology, 2011, 27, 110-113	VDss from MRT and clearance. 600 mg dose in 1-hr infusion, N=11.		1986	285.32	6	2	87.1	3	anionic	-1	-4.4
Fasudil	103745-39-7	O=S(=O)(N1CCCNCC1)c2cccc3cnccc23	1.22	77.5		0.26	0.44	HAN Min, CHEN Huaying, LIN Yang , ZHOU Zijie, WANG Lifeng, BAI Mei, LI Jing, WANG K. The Investigation on Pharmacokinetics of FasudilAfter a Single Dose Intravenous infusion. Chin Pharm. J. 2011, 46, 293-296.	Fasudil mesylate, N=12, 59 kg average weight, 35 mg dose = 26.31 mg free base. Data digitized from Figure 2. Fairly large error on the plot. Digitization deemed accurate although results differ from error range reported. Data accepted after discussion.		1986	291.37	5	1	62.3	2	cationic	1.2	0.49
Felodipine	72509-76-3	CCOC(=O)C1=C(C)NC(=C(C1c2cccc(Cl)c2Cl)C(=O)OC)C	4.4	11	0.0036	6.7	10	Edgar B, Regardh CG, Johnsson G, Johansson L, Lundborg P, Lofberg I, and Ronn O (1985) Felodipine kinetics in healthy men. Clin. Pharmacol. Ther. 38: 205-211.	VDss calculated from compartmental parameters provided in the reference by Edgar, et al., 1985.		1980	384.25	5	1	64.6	6	neutral	4.2	4.2
Fenoldopam	67227-56-9	c12[C@@H](c3ccc(O)cc3)CNCCc1c(c(O)c(c2)O)Cl	0.5	41.5	0.12	0.2	1	PP. Fenoldopam Mesylate - FDA Approval Package Clinical Pharmacology and Biopharmaceutics Review 019922 1997-Sep-25 PDF(1763k)	N=12 healthy volunteers. 1 ug/kg/min dose. MRT from VDss and clearance.	PP. Fenoldopam Mesylate - FDA Approval Package Clinical Pharmacology and Biopharmaceutics Review 019922 1997-Sep-25 PDF(1763k)	1980	305.76	4	4	72.7	1	cationic	2.7	1.9
Fenoprofen	29679-58-1	C([C@@H](c1cc(Oc2ccccc2)ccc1)C)(=O)O	0.1	0.6	0.02	2.8	2.24	Physiological disposition of fenoprofen in man. II. Plasma and Urine Pharmacokinetics after Oral and Intravenous Administration. Rubin, Alan; Rodda, Bruce E.; Warrick, Patricia; Ridolfo, Anthony; Gruber, Charles M. Journal of Pharmaceutical Sciences (1971), 60(12), 1797-801. ppb: Physiological disposition of fenoprofen in man. III. Metabolism and protein binding of fenoprofen. Rubin, Alan; Warric…	N=4, data calculated as average of V1+V2; microconstant also available. Median weight 67.5 kg. MRT = VDss/CL. One-compartment model data used.		1970	242.27	3	1	46.5	4	anionic	3.2	0.48
Fenoterol	13392-18-2	CC(Cc1ccc(O)cc1)NCC(O)c2cc(O)cc(O)c2	1.2	29	0.53	0.69	0.87	Warnke K, Hildebrandt R, Gunther K, Langen U, and Gundert-Remy U (1992) The pharmacokinetics of the beta2-adrenoreceptor agonist fenoterol in healthy women. Eur. J. Clin. Pharmacol. 43: 663-665. Heel RC, Brigden RN, Speight TM, and Avery GS (1978) Fenoterol: a review of its pharmacological properties and therapeutic efficacy in asthma. Drugs 15: 3-32.	Study subjects all women, so a body weight of 55 kg was assumed.		1970	303.35	5	5	92.9	6	cationic	1.5	0.7
Fenspiride	5053-06-5	O=C1NCC2(CCN(CCc3ccccc3)CC2)O1	3	2.6		19	14	Montes B, Catalan M, Roces A, Jeanniot JP, and Honorato JM (1993) Single-dose pharmacokinetics of fenspiride hydrochloride: phase I clinical trial. Eur. J. Clin. Pharmacol. 45: 169-172.	VDss calculated from C vs t data included in the reference.		1965	260.33	4	1	41.6	3	cationic	2	0.16
Fentanyl	437-38-7	CCC(=O)N(C1CCN(CCc2ccccc2)CC1)c3ccccc3	0.89	4.7	0.16	3.2	3	Fung DL and Eisele JH (1980) Fentanyl pharmacokinetics in awake volunteers. J. Clin. Pharmacol. 20: 652-658. Schleimer R, Benjamani E, Eisele J, and Henderson G (1977) Pharmacokinetics of fentanyl as determined by radioimmunoassay. Clin. Pharmacol. Ther. 23: 188-194. Meuldermans WEG, Hurkmans RMA, and Heykants JJP (1982) Plasma protein binding and distribution of fentanyl, sufentanil, alfentanil …			1963	336.47	3	0	23.5	6	cationic	4.1	2.8
Fimasartan	247257-48-3	CCCCc1nc(c(c(=O)n1Cc2ccc(cc2)c3ccccc3c4[nH]nnn4)CC(=S)N(C)C)C	0.6	9.6		1.1	5.5	Jong-Lyul Ghim, Soo Heui Paik, M. Hasanuzzaman, Yong Ha Chi, Hyang-Ki Choi, Dong-Hyun Kim, Jae-Gook Shin. Absolute Bioavailability and Pharmacokinetics of the Angiotensin II Receptor Antagonist Fimasartan in Healthy Subjects. J. Clin. Pharmacol. 2016, 56, 576-580.	N=16, 30 mg dose, 1 h infusion. No average weight reported but data available on weight basis.		1999	501.65	8	1	92.6	10	cationic	4.1	0.71
Finafloxacin	209342-40-5	c1c2c(c(c(c1F)N3C[C@H]4[C@H](C3)OCCN4)C#N)n(cc(c2=O)C(=O)O)C5CC5	1.42	5.75	0.75	4.11	13.42	Max Taubert, Joseph Chiesa, Mark Lückermann, Carsten Fischer, Axel Dalhoff,Uwe Fuhr. Pharmacokinetics of intravenous finafloxacin in healthy volunteers. Antimicr. Agents Chemother. 2017. Posted on line August 7 2017. doi:10.1128/AAC.01122-17.	MRT from VDss and clearance. N=29 (total), 1 hr infusion across doses from 200 to 1000 mg. average weight 75.9 kg. All data weight-averaged by number of subjects with very high concordance across doses (linear PK).		1998	398.39	8	2	107.6	4	anionic	1.1	-1.9
Finasteride	98319-26-7	CC(C)(C)NC(=O)[C@H]1CC[C@H]2[C@@H]3CC[C@H]4NC(=O)C=C[C@]4(C)[C@H]3CC[C@]12C	1.1	2.4	0.095	7.6	6	Steiner JF (1996) Clinical pharmacokinetics and pharmacodynamics of finasteride. Clin. Pharmacokinet. 30: 16-27. Carlin JR, Hoglund P, Eriksson LO, Christofalo P, Gregoire SL, Taylor AM, and Andersson KE (1992) Disposition and pharmacokinetics of [14C]finasteride after oral administration in humans. Drug Metab. Dispos. 20: 148-155			1985	372.54	4	2	58.2	1	neutral	3.2	3.2
Fingolimod	162359-55-9	c1(ccc(cc1)CCCCCCCC)CCC(CO)(N)CO	17.3	1.53	0.002	189	144	PP. Fingolimod Hydrochloride - FDA Approval Package Pharmacology Review 022527/S-000 Part 04	MRT from VDss and Cl. N=11, (5M/6F) 1 mg dose iv injection, reported average weight 69.1 kg. Reported source, study A0108. ppb reported as 99.7 to 99.9% across species. 99.8% taken	PDR. Accessed February 21 2013. http://www.pdr3d.com/detail.php?c=64159#section-13. After oral administration, about 81% of the dose is slowly excreted in the urine as inactive metabolites. Fingolimod and fingolimod-phosphate are not excreted intact in urine but are the major components in the feces with amounts of each representing less than 2.5% of the dose.	1994	307.47	3	3	66.5	12	cationic	3.7	2.6
Flavopiridol	146426-40-6	CN1CC[C@@H]([C@H](O)C1)c2c(O)cc(O)c3C(=O)C=C(Oc23)c4ccccc4Cl	1.5	6.1	0.06	4	5.2	Zhai S Sausville EA, Senderowicz AM, Ando Y, Headlee D, Messmann RA, Arbuck S, Murgo AJ, Melillo G, Fuse E, and Figg WD (2003) Clinical pharmacology and pharmacogenetics of flavopiridol 1-h i.v. infusion in patients with refractory neoplasms. Anti-Cancer Drugs. 14: 125-135. Rudek MA, Bauer KS, Lush RM, Stinson SF, Senderowicz AM, Headlee DJ, Arbuck SG, Cox MC, Murgo AJ, Sausville EA, and Figg WD …			1961	401.84	6	3	90.2	2	zwitterionic	3.6	2.4
Flecainide	54143-55-4	FC(F)(F)COc1ccc(OCC(F)(F)F)c(c1)C(=O)NCC2CCCCN2	6.1	4.9	0.52	21	12	Wang T, Siddoway LA, Thompson KA, Conard GJ, Bergstrand RH, Kvam D, Roden DM, and Woosley RL (1988) The development and testing of intravenous dosing regimens: application to flecainide for teh suppression of ventricular arrhythmias. Clin. Pharmacol. Ther. 43: 499-508. Tjandra-Maga TB, Verbesselt R, Van Hecken A, Mullie A, and DeSchepper PJ (1986) Flecainide: single and multiple oral dose kinetic…	VDss from the reference by Wang, et al, was calculated using the compartmental parameters reported in the reference.		1979	414.34	5	2	59.6	7	cationic	3.1	1.6
Fleroxacin	79660-72-3	CN1CCN(CC1)c2c(F)cc3C(=O)C(=CN(CCF)c3c2F)C(=O)O	1.6	2.4	0.73	11	8.6	Weidekamm E, Portmann R, Suter K, Partos C, Dell D, and Lucker PW (1987) Single- and multiple-dose pharmacokinetics of fleroxacin, a trifluorinated quinolone, in humans. Antimic. Agents Chemother. 31: 1909-1914. Bergogne-Berezin E (2002) Clinical role of protein binding of quinolones. Clin. Pharmacokinet. 41: 741-750.			1981	369.34	6	1	64.1	4	zwitterionic	2	-0.27
Flomoxef	99665-00-6	n1(nnnc1SCC1=C(N2[C@H](OC1)[C@@](C2=O)(OC)NC(=O)CSC(F)F)C(O)=O)CCO	0.19	4.1	0.64	0.77	0.6	Saito, Haruo; Kimura, Tadashi; Takeda, Taizo; Kishimoto, Seiji; Oguma, Takayoshi; Shimamura, Kenji. Pharmacokinetics of flomoxef in mucosal tissue of the middle ear and mastoid following intravenous administration in humans. Chemotherapy (Basel, Switzerland), 1990, 36, 193-199.//ppb:Hamada, Toshihiro; Ueta, Eisaku; Kodama, Hiroyuki; Osaki, Tokio. The excretion of cephem antibiotics into saliva is…	VDss from Vc and k12/k21. Clearance from dose/AUC. MRT from Clearance and VDss. 1 g dose, N=6, 70 kg weight assumed.		1984	496.47	13	3	169	11	anionic	-0.98	-4
Flucloxacillin	5250-39-5	Cc1onc(c1C(=O)N[C@H]2[C@H]3SC(C)(C)[C@@H](N3C2=O)C(=O)O)c4c(F)cccc4Cl	0.19	2.4	0.043	1.3	1.4	Adam D, Koeppe P, and Heilmann (1983) Pharmacokinetics of amoxicillin and flucloxacillin following the simultaneous intravenous administration of 4 g and 1 g respectively. Infection 11: 150-154. Bergan T, Engeset A, Olszewski W, Oestby N, and Solberg R (1986) Extravascular penetration of highly protein-bound flucloxacillin. Antimic. Agents Chemother. 30: 729-732. Roder BL, Frimodt-Moller, Esperse…			1968	453.87	8	2	113	4	anionic	2.8	-0.5
Fluconazole	86386-73-4	c1c(cc(c(C(Cn2ncnc2)(O)Cn2cncn2)c1)F)F	0.75	0.31	0.89	40	30	Foulds G, Wajszczuk C, Weidler DJ, Garg DJ, and Gibson P (1988) Steady state parenteral kinetics of fluconazole in man. Ann. N.Y. Acad. Sci. 544: 427-30. Humphrey MJ, Jevons S, and Tarbit MH (1985) Pharmacokinetic evaluation of UK-49,858, a metabolically stable triazole antifungal drug, in animals and humans. Animic. Agents Chemother. 28: 648-653.		From PDR. Accessed march 6 2013.http://www.pdr3d.com/detail.php?c=9255#section-4. In normal volunteers, fluconazole is cleared primarily by renal excretion, with approximately 80% of the administered dose appearing in the urine as unchanged drug. About 11% of the dose is excreted in the urine as metabolites.	1930	306.27	7	1	81.7	5	neutral	0.19	0.19
Flucytosine	2022-85-7	NC1=C(F)C=NC(=O)N1	0.68	2	1	5.7	4.2	Cutler RE, Blair AD, and Kelly MR (1978) Flucytosine kinetics in subjects with normal and impaired renal function. Clin. Pharmacol. Ther. 24; 333-342. Lee KJ, Mower R, Hollenbeck T, Castelo J, Johnson N, Gordon P, Sinko PJ, Holme K, and Lee YH (2003) Modulation of nonspecific binding in ultrafiltration protein binding studies. Pharm. Res. 20: 1015-1021.			1957	129.09	4	2	67.5	0	neutral	-2.3	-2.3
Fludarabine	21679-14-1	Nc1nc(F)nc2c1ncn2[C@@H]3O[C@H](CO)[C@@H](O)[C@@H]3O	2.2	3.2	0.76	12	11	Kuo GM, Boumpas DT, Illei GG, Yarboro C, Pucino F, and Burstein AH (2001) Fludarabine pharmacokinetics after subcutaneous and intravenous administration in patients with lupus nephritis. Pharmacother. 21: 528-533. Knebel W, David JC, Sanders WD, Fessler B, Yarboro C, Pucino F, and Boumpas DT (1998) The pharmacokinetics and pharmacodynamics of fludarabine in rheumatoid arthritis. Pharmacotherapy 1…	9-beta-D-Arabinofuranosyl-2-fluoroadenine, NSC 118218. Data from Kuo, et al were digitized prior to calculation of VDss. Micro rate constants from Knebel were used to calculated VDss.		1969	285.23	9	4	139.5	2	neutral	-1.8	-1.8
Flumazenil	78755-81-4	CCOC(=O)c1ncn2c1CN(C)C(=O)c3cc(F)ccc23	0.8	16	0.58	1	0.78	Janssen U, Walker S, Maier K, von Gaisberg U, and Klotz U (1989) Flumazenil disposition and elimination in cirrhosis. Clin. Pharmacol. Ther. 46: 317-323. Pomier-Layrargues G, Giguere JF, Lavoie J, Willems B, and Butterworth RF (1989) Pharmacokinetics of benzodiazepine antagonist RO 15-1788 in cirrhotic patients with moderate or severe liver dysfunction. Hepatology 10: 969-972. Klotz U, Ziegler G,…			1981	303.29	6	0	64.4	3	neutral	1	1
Flunisolide	3385-03-3	O1[C@@H]2C[C@H]3[C@@H]4C[C@H](F)C5=CC(=O)C=C[C@@]5(C)[C@H]4[C@H](C[C@@]3([C@]2(C(CO)=O)OC1(C)C)C)O	1.08	9.5	0.24	1.89	1.68	Flunisolide metabolism and dynamics of a metabolite.Chaplin MD, Rooks W II, Swenson EW, Cooper WC, Nerenberg C and Chu NI. Clin Pharmacol Ther 1980, 27:402-413.//ppb: Loren M. Berry, Chao Li, and Zhiyang Zhao. Species Differences in Distribution and Prediction of Human Vss from Preclinical Data Drug Metab. Disp. 2011, 39, 2103-2106.	N=9, 1 mg dose. Calculated from reported plot (figure 3) in blood corrected for B/P =0.89. Data in blood and 0.89 B/P reported. Table involving 12 subjects (median weight 81.8 kg) but plot referring to 9 of them. The calculations below were performed after a correction to yield plasma concentration and some adjustment of time points digitized to approach reported AUC (C0 inserted manually). Repor…		1963	434.5	6	2	93.1	2	neutral	2.5	2.5
Flunitrazepam	1622-62-4	CN1C(=O)CN=C(c2ccccc2F)c3cc(ccc13)N(=O)=O	1.9	1.4	0.17	23	25	Kangas L, Kanto J, and Pakkanen A (1982) A pharmacokinetic and pharmacodynamic study of flunitrazepam. Int. J. Clin. Pharmacol. Ther. Toxicol. 20: 585-588. Lucek RW and Coutinho CB (!976) The role of substituents in the hydrophobic binding of the 1,4-benzodiazepines by human plasma proteins. Molec. Pharmacol. 12: 612-619.	VDss calculated from C vs t data obtained by digitization of the plot included in the reference.		1963	313.28	6	0	78.5	2	neutral	2.1	2.1
Fluocortolone	152-97-6	[C@H]12[C@H]3[C@@]([C@H]([C@@H](C3)C)C(=O)CO)(C[C@@H]([C@@H]1[C@@]1(C(=CC(=O)C=C1)[C@H](C2)F)C)O)C	0.68	7	0.04	1.6	1.3	Täuber U, Haack D, Nieuweboer B, Kloss G, Vecsei P, Wendt H. The pharmacokinetics of fluocortolone and prednisolone after intravenous and oral administration. Int J Clin Pharmacol Ther Toxicol. 1984, 22, 48-55.//ppb: Fellier, H.; Gleispach, H.; Esterbauer, H. Binding of cortisol, fluocortolone, and difluocortolone to human plasma proteins. J. Clin. Chem. Clin. Biochem. 1977, 15, 545-548	VDss calculated from noncompartmental analysis of the mean of the individual C vs t data provided in the reference.N=5, mean BW = 64 kg, dose was 5 mg		1962	376.46	4	2	74.6	2	neutral	2.3	2.3
Fluorescein	2321-07-5	Oc1ccc2c(Oc3cc(O)ccc3C24OC(=O)c5ccccc45)c1	0.14	1.3	0.11	1.8	1.6	Larsen M, Loft S, Hommel E, and Lund-Andersen H (1988) Fluorescein and fluorescein glucuronide in plasma after intravenous injection of fluorescein. Acta Opthamol. 66: 427-432.	Pharmacokinetic parameters were calculated from C vs t data obtained by digitization of the plot provided in the reference.		1931	332.31	5	2	76	0	neutral	3.9	3.9
fluorodideoxycytidine, 2- (2FddC)	119555-47-4	c1cn(c(=O)nc1N)[C@H]2[C@H](C[C@H](O2)CO)F	0.7	6.1	1	1.9	1.8	Williams, P. E. O.; Muirhead, G. J.; Sereni, D.; Rousseau, F. S.; Edelman, K.; Hooker, M. Pharmacokinetics of 2-​fluorodideoxycytidine (2FddC) in patients infected with human immunodeficiency virus. British Journal of Clinical Pharmacology (1993), 35(3), 255-260	N=28, abg BW= 67kg. Dose = 0.03, 0.1 and 0.3 mg/kg. Average PK of digitized profiles of the highest three doses shown in Figure 1. Average of data reported in Table 2: CL = 5.7 mL/min/kg (23.1 L/h), term. t1/2 1.9h		1988	229.21	6	2	90.4	2	neutral	-1.2	-1.2
Fluorouracil, 5-	51-21-8	FC1=CNC(=O)NC1=O	0.23	26	0.64	0.15	0.12	Port RE, Daniel B, Ding RW, and Herrmann R (1991) Relative importance of dose, body surface area, sex, and age for 5-flurouracil clearance. Oncology 48: 277-281. Schaaf LJ, Dobbs BR, Edwards IR, and Perrier DG (1987) Nonlinear pharmacokinetic characteristics of 5-fluorouracil (5-FU) in colorectal cancer patients. Eur. J. Clin. Pharmacol. 32: 411-418. Esposito M, Rosso R, and Santi L (1974) Plasma…	5-FU shows dose dependent kinetics; low dose data cited.		1946	130.08	4	2	58.2	0	neutral	-0.93	-1.1
Flupentixol	2709-56-0	c1ccc2c(c1)/C(=C/CCN3CCN(CC3)CCO)/c4cc(ccc4S2)C(F)(F)F		4.14			34.2	Joergensen, A.; Andersen, J.; Bjoerndal, N.; Dencker, S. J.; Lundin, L.; Malm, U. Serum concentrations of cis(Z)-flupentixol and prolactin in chronic schizophrenic patients treated with flupentixol and cis(Z)-flupentixol decanoate. Psychopharmacol.1982, 77, 58-65.	N-7009. Flupenthixol. Siplaril. Administered iv at 2 mg dose, to N=9 schizophrenic patients, as a mixture 1:1 of diastereomers. Not clear whether the analysis referred to Z-flupentixol (CAS # 53772-82-0). CAS number and structure refers to compound with unspecified double bond geometry. Average weight calculated as exactly 70 kg.No VDss reported.		1963	434.52	3	1	26.7	5	cationic	4.8	3.9
Fluphenazine	69-23-8	[H]OCCN1CCN(CCCN2c3ccccc3Sc3ccc(cc23)C(F)(F)F)CC1	2.9	9.7	0.04	5	12.3	Koytchev R. et al. Absolute bioavailability of oral immediate and slow release fluphenazine in healthy volunteers. Eur. J. Clin. Pharmacol. 1996, 51, 183-187. fu from Waters et al, 2008.	N=14, 2.5 mg i.v. bolus, 72 kg average weight. VDss calculated from Cl and MRT.		1958	437.52	4	1	29.9	7	cationic	4.5	3.7
Flupirtine	56995-20-1	CCOC(=O)Nc1ccc(NCc2ccc(F)cc2)nc1N	1.1	1.6	0.15	11	8.5	Hlavica VP and Niebch G (1985) Untersuchungen zur pharmakokinetik und biotransformation des analgetikums flupirtin beim menschen. Arz. Forsch. 35: 67-74.	VDss calculated from C vs t data obtained by digitization of the plots in the reference.		1979	304.32	6	3	89.3	6	cationic	3.1	2.7
Fluticasone furoate	397864-44-7	C[C@@H]1C[C@H]2C3C[C@@H](C4=CC(=O)C=C[C@@]4([C@]3([C@H](C[C@@]2([C@]1(C(=O)SCF)OC(=O)c5ccco5)C)O)F)C)F	4.95	13.4			10.6	Ann Allen, BA; Geoff Down, MB BS FFPM; Amy Newland, MSc; Karen Reynard, BSc; Vicki Rousell, BSc; Emma Salmon, MSc; and Rebecca Scott, PhD Absolute Bioavailability of Intranasal Fluticasone Furoate in Healthy Subjects. Clin. Ther, 2007, 29, 1415-1420	73 kg average weight, N= 16, 250 ug iv.		2002	538.58	6	1	94.1	6	neutral	3.7	3.7
Fluticasone propionate	80474-14-2	CCC(=O)O[C@@]1([C@H](C)C[C@H]2[C@@H]3C[C@H](F)C4=CC(=O)C=C[C@]4(C)[C@@]3(F)[C@@H](O)C[C@]12C)C(=O)SCF	3.6	17	0.1	3.9	6	Brutsche MH, Brutsche IC, Munavvar M, Langley SJ, Masterson CM, Daley-Yates PT, Brown R, Custovic A., and Woodcock A (2000) Comparison of pharmacokinetics and systemic effects of inhaled fluticasone propionate in patients with asthma and healthy volunteers: a randomised crossover study. Lancet 356: 556-561. Mackie AE, Ventresca GP, Fuller RW, and Bye A (1996) Pharmacokinetics of intravenous fluti…			1981	500.57	5	1	80.7	6	neutral	3.3	3.3
Fluvastatin	93957-54-1	CC(C)n1c(\C=C\[C@H](O)C[C@H](O)CC(=O)O)c(c2ccc(F)cc2)c3ccccc13	0.42	16	0.0079	0.44	0.7	Tse F L; Jaffe J M; Troendle A Pharmacokinetics of fluvastatin after single and multiple doses in normal volunteers. Journal of clinical pharmacology (1992), 32(7), 630-8. Tse FLS, Nickerson DF, and Yardley WS (1993) Binding of fluvastatin to blood cells and plasma proteins. J. Pharm. Sci. 82: 942-947.			1984	411.47	5	3	82.7	8	anionic	2.9	-0.11
Fluvoxamine	54739-18-3	c1(\C(CCCCOC)=N\OCCN)ccc(C(F)(F)F)cc1	23.5	31.95	0.2	12.26	12.5	J. van Harten, F. Kok, A. Lönnebo and A. Grahnén. Pharmacokinetics of fluvoxamine after intravenous and oral administration. Eur. Neuropsychopharmacology, 1994, 4, 331.	Average of two doses, N=17 per dose, 70 kg/average weight assumed. 10 and 30 mg doses as iv infusion in 60 minutes. Clearance from dose/AUC, then averaged. MRT from VDss and clearance.	Ppb from PDR label. Absolute BA from paper 53% (po dose 50 mg, crossover with iv doses)	1977	318.33	4	1	56.8	9	cationic	3.1	1.2
Folic acid	59-30-3	c1cc(ccc1C(=O)N[C@@H](CCC(=O)O)C(=O)O)NCc2cnc3c(n2)c(=O)nc([nH]3)N	9.7	52	0.5	3.1	2.6	Menke A; Weimann H J; Achtert G; Schuster O; Menke G. Absolute bioavailability of folic acid after oral administration of a folic acid tablet formulation in healthy volunteers. Arzneimittel-Forschung (1994), 44(9), 1063-1067// ppb: Elsborg L. Binding of Folic Acid to Human Plasma Proteins. Acta Haematol 1972,48, 207–212.	N=17. Dose = 5 mg 6min infusion. BW = 87.5 kg PK iv profile reported in table 1. Concentration corrected from predose level of 18.2 ng/mL. MRT Calculated from VDss and CL. AUC0-12h (ng*h/mL) = 1546 (reported 1550). AUC0-inf (ng*h/mL) = 1601		1946	441.4	13	6	213.3	9	anionic	-1.3	-8.6
Folinic acid	58-05-9	NC1=NC(=O)C2=C(NCC(CNc3ccc(cc3)C(=O)N[C@@H](CCC(=O)O)C(=O)O)N2C=O)N1	0.25	5.8	0.087	0.8	1.3	Greiner PO, Zittoun J, Marquet J, and Cheron JM (1989) Pharmacokinetics of (-)-folinic acid after oral and intravenous administration of the racemate. Br. J. Clin. Pharmacol. 28: 289-295. Christophidis N, Louis WJ, Lucas I, Moon W, and Vajda FJ (1981) Renal clearance of methotrexate in man during high-dose oral and intravenous infusion therapy. Cancer Chemother Pharmacol. 6: 59-64.	Data from (-) enantiomer used.		1948	473.44	14	7	215.6	9	anionic	-2.1	-7.6
Fomepizole	7554-65-6	c1(cn[nH]c1)C	0.35	0.73		7.94	4.42	KENNETH E. MCMARTIN , C. SIMON SEBASTIAN, DAVID DIES , DAG JACOBSEN. Kinetics and metabolism of fomepizole in healthy humans. Clin. Toxicol. 2012, 50, 375–383	N=5, average weight assumed to be 70 kg. 7 mg/kg = 85.3 umol/kg (MW 82.1). Data digitized from plot reported and analyzed via PKSolver. AUC reported 1880 umol.h.L-1; calculated 1953.3 umol.h.L-1.		1930	82.1	2	1	28.7	0	neutral	0.72	0.72
Fondaparinux	104993-28-4	S(=O)(=O)(O)OC[C@@H]1[C@H]([C@@H]([C@@H](NS(=O)(=O)O)[C@H](O1)OC)O)O[C@H]1[C@H](OS(=O)(=O)O)[C@H]([C@@H]([C@H](C(=O)O)O1)O[C@@H]1[C@H](NS(=O)(=O)O)[C@H]([C@@H]([C@H](O1)COS(=O)(=O)O)O[C@@H]1O[C@@H]([C@H]([C@@H]([C@H]1O)O)O[C@@H]1[C@@H]([C@H]([C@@H]([C@H](O1)COS(=O)(=O)O)O)O)NS(=O)(=O)O)C(=O)O)OS(=O)(=O)O)O		0.07	0.21		19.3	François Donat, Jean Pierre Duret, Alix Santoni, Roger Cariou, José Necciari, Harry Magnani and Rik de Greef. The Pharmacokinetics of Fondaparinux Sodium in Healthy Volunteers. Clin Pharmacokinet 2002; 41 Suppl. 2: 1-9. ppb: Paolucci F , Claviés MC , Donat F , Necciari. Fondaparinux Sodium Mechanism of Action Identification of Specific Binding to Purified and Human Plasma-Derived Proteins J . Cli…	two sd at 4 mg averaged in elderly subjects. Fairly close values across other doses. N= 66. Only Vz reported. 7.9 and 10.8 L for the same two groups.t1/2 18.4 and 20.3 h, respectively. Ppb: 79% reported as unspecific binding in plasma. Table II in reference cited.	Almost completely excreted renally unchanged.	1986	1508.26	52	19	805.5	30	anionic	-9	-9
Forodesine	209799-67-7	[nH]1cnc2c([nH]cc2[C@@H]2N[C@@H]([C@H]([C@H]2O)O)CO)c1=O		1.56			11.6	A proof-of-principle pharmacokinetic, pharmacodynamic, and clinical study with purine nucleoside phosphorylase inhibitor immucillin-H (BCX-1777, forodesine) Varsha Gandhi, John M. Kilpatrick, William Plunkett, Mary Ayres, Leigh Harman, Min Du, Shanta Bantia, Jan Davisson, William G. Wierda, Stefan Faderl, Hagop Kantarjian, and Deborah Thomas. BLOOD, 2005 VOLUME 106, (13)4253-4260.	Only Vz reported. Infusion across 5 patients. One patient received 4 doses. N = 8 total.		1998	266.25	8	6	134.3	2	cationic	-3.9	-4.3
Fosaprepitant	172673-20-0	n1([nH]c(nc1=O)C[N@@]1[C@H]([C@H](OCC1)O[C@H](C)c1cc(cc(c1)C(F)(F)F)C(F)(F)F)c1ccc(cc1)F)P(=O)(O)O	0.07	18.6	0.02	0.06	2.2	Kenneth C. Lasseter, Jay Gambale, Bo Jin, Art Bergman, Marvin Constanzer, James Dru, Tae H. Han, Anup Majumdar,Judith K. Evans and M. Gail Murphy. Tolerability of Fosaprepitant and Bioequivalency to Aprepitant in Healthy Subjects. J Clin Pharmacol 2007 47: 834-840.	average of two doses iv. Very tight data. MRT from VDss and Cl.	PP. Fosaprepitant Dimeglumine - EMA Approval Package Assessment Report EMEA/42754/2008	1995	614.41	10	3	129.9	7	anionic	2.4	-3.5
Foscarnet	4428-95-9	OC(=O)P(=O)(O)O	0.5	2.1	0.85	4	4.7	Aweeka FT, Gambertoglio JG, Kramer F, van der Horst C, Polsky B, Jayewardene A, Lizak P, Emrick L, Tong W, and Jacobson MA (1995) Foscarnet and ganciclovir pharmacokinetics during concomitant or alternating maintenance therapy for AIDS-related cytomegalovirus retinitis. Clin. Pharmacol. Ther. 57: 403-412. Sjovall J, Bergdahl S, Movin G, Ogenstad S, and Saarimaki M (1989) Pharmacokinetics of fosca…	Long terminal phase t1/2 of 88 h reported in Sjovall with a 3-compartment model.		1924	126.01	5	3	94.8	1	anionic	-1.2	-7.6
Fosfluconazole	194798-83-9	OP(=O)(O)OC(Cn1cncn1)(Cn2cncn2)c3ccc(F)cc3F	0.15	1.3	0.042	2	2.1	Sobue S, Tan K, Layton G, Leclerc V, and Weil A (2004) The effects of renal impairment on the pharmacokinetics and safety of fosfluconazole and fluconazole following a single intravenous bolus injection of fosfluconazole. Br. J. Clin. Pharmacol. 57: 773-784.			1997	386.25	10	2	128.2	7	anionic	-0.79	-5.1
Fosfomycin	23155-02-4	C[C@@H]1O[C@@H]1P(=O)(O)O	0.32	2	1	2.7	1.9	Goto M, Sugiyama M, Nakajima S, and Yamashina H (1981) Fosfomycin kinetics after intravenous and oral administration to human volunteers. Antimic. Agents Chemother. 20: 393-397. Potel G, Meignier M, Baron D, Reynaud A, Touze MD, and Cortieu AL (1989) Pharmacokinetics of fosfomycin in normal and burn patients. Effect of probenecid. Drugs Exptl. Clin. Res. 15: 177-184. Kestle DG and Kirby WMM (1970…			1969	138.06	4	2	70.1	1	anionic	-0.62	-5.7
Fosinoprilat	95399-71-6	OC(=O)[C@@H]1C[C@H](CN1C(=O)CP(=O)(O)CCCCc2ccccc2)C3CCCCC3	0.13	0.32	0.006	6.8	9.4	Kostis JB, Garland WT, Delaney C, Norton J, and Liao WC. Fosinopril: pharmacokinetics and pharmacodynamics in congestive heart failure. Clin. Pharmacol. Ther. 1995, 58, 660-665			1985	435.49	6	2	94.9	9	anionic	4.2	-1
Fosphenytoin	93390-81-9	C1(c2ccccc2)(c2ccccc2)C(=O)N(C(=O)N1)COP(=O)(O)O	0.06	3.5	0.05	0.17	0.16	Aweeka, Francesca T.; Gottwald, Mildred D.; Gambertoglio, John G.; Wright, Teresa L.; Boyer, Thomas D.; Pollock, Alan S.; Eldon, Michael A.; Kugler, Alan R.; Alldredge, Brian K. Pharmacokinetics of fosphenytoin in patients with hepatic or renal disease. Epilepsia (1999), 40(6), 777-782.	Dosed and monitored as phosphenytoin. Healthy subjects only. 0.37 g in 30' infusion.	Aweeka, Francesca T.; Gottwald, Mildred D.; Gambertoglio, John G.; Wright, Teresa L.; Boyer, Thomas D.; Pollock, Alan S.; Eldon, Michael A.; Kugler, Alan R.; Alldredge, Brian K. Pharmacokinetics of fosphenytoin in patients with hepatic or renal disease. Epilepsia (1999), 40(6), 777-782.	1984	362.27	8	3	116.2	5	anionic	1.7	-3.3
Fostriecin	87810-56-8	C[C@@](O)(\C=C\[C@H]1CC=CC(=O)O1)[C@@H](C[C@@H](O)\C=C/C=C\C=C\CO)OP(=O)(O)O	0.086	1.2		1.2	1.5	de Jong RS, Mulder NH, Uges DRA, Sleijfer DT, Hoppener FJP, Groen HJM, Willemse PHB, van der Graaf WTA, and de Vries EGE (1999) Phase I and pharmacokinetic study of the topoisomerase II catalytic inhibitor fostriecin. Br. J. Cancer 79: 882-887.			1983	430.39	9	5	153.7	11	anionic	-0.81	-4.4
Fotemustin	92118-27-9	P(=O)(OCC)(OCC)C(NC(=O)N(CCCl)N=O)C	0.62	18.5		0.55	0.38	R.M. J. Ings, A. J. Gray, A.R. Taylor, B.H. Gordon, M. Breen, M. Hiley, R. Brownsill, N. Marchant, R. Richards, D. Wallace, T. Hughes, R. Thomas, J. Williams, C. Lucas and D.B. Campbell Disposition, Pharmacokinetics, and Metabolism of 14C-Fotemustine in Cancer Patients. Eur. J. Cancer, 1990, 26, 838-842.	N=2. Double digitization and average of PK data. Patient 1 and 2 52.4 and 73.9 kg weight, F and M, respectively. 133.9 and 176.1 mg dose, respectively. 1 hr infusion and excellent agreement with reported clearance and Vz. Patient 1 1365 mL/min calculated and 1426 mL/min reported; patient 2 787 mL/min calculated and 764 mL/min reported.		1984	315.69	8	1	97.3	9	neutral	1.5	1.5
Frovatriptan	158747-02-5	CN[C@@H]1CCc2[nH]c3ccc(cc3c2C1)C(=O)N	3.6	2.5	0.85	22	24	Buchan P, Keywood C, Wade A, and Ward C (2002) Clinical pharmacokinetics of frovatriptan. Headache 42(Suppl 2): s54-s62.			1994	243.3	4	3	70.9	2	cationic	1.3	-0.86
Fulvestrant	129453-61-8	[H]Oc1ccc2c(C[C@H](CCCCCCCCCS(CCCC(C(F)(F)F)(F)F)=O)C3[C@@H]2CC[C@@]2(C)[C@H]3CC[C@@H]2O[H])c1	4.15	11.8	0.01	5.86	16	Robertson JFR, Harrison M. Fulvestrant: pharmacokinetics and pharmacology. British Journal of Cancer, 2004, 90(Suppl 1), S7-S10. ppb: The PDR states: Fulvestrant is highly (99%) bound to plasma proteins; VLDL, LDL and HDL lipoprotein fractions appear to be the major binding components. Accessed January 11 2015. http://www.pdr3d.com/detail.php?c=82597#section-12.	Data from 1-h iv infusion doses. MRT calculated from CL and VDss		1989	606.77	3	2	57.5	16	neutral	9	9
Furosemide	54-31-9	NS(=O)(=O)c1cc(C(=O)O)c(NCc2occc2)cc1Cl	0.12	1.6	0.012	1.3	2.5	Smith DE, Lin ET, and Benet LZ (1980) Absorption and disposition of furosemide in healthy volunteers, measured with a metabolite-specific assay. Drug Metab. Dispos. 8: 337-342. Hammerlund MM, Paalzow LK, and Odlind B (1984) Pharmacokinetics of furosemide in man after intravenous and oral administration. Application of moment analysis. Eur. J. Clin. Pharmacol. 26: 197-207			1948	330.74	7	3	122.9	5	anionic	1.8	-1.4
Fusidate sodium	751-94-0	C(=O)([O-])C(=C1\[C@@H](OC(=O)C)C[C@@]2([C@@]3(CC[C@H]4[C@@H]([C@@H](CC[C@@]4(C)[C@@H]3[C@H](O)C[C@@H]12)O)C)C)C)\CC\C=C(\C)C	0.23	0.35	0.02	10.6	9.8	A. M. Taburet, J. Gufbert, M. D. Kitris, H. Sorensen, J. F. Acar and E. Singes. Pharmacokinetics of sodium fusidate after single and repeated infusions and oral administration of a new formulation. Journal of Antimicrobial Chemotherapy (1990) 25, Suppl. B, 23-31.//ppb: Markus A. Zeitlinger, Hartmut Derendorf, Johan W. Mouton, Otto Cars, William A. Craig, David Andes, and Ursula Theuretzbacher. Pr…	N=8, 61.6 kg average weight, dose 500 mg 2 hr infusion. VDss calculated from MRT and clearance from first dose.		1962	515.7	6	2	106.9	6	anionic	5.7	3.3
Fuzlocillin	66327-51-3	CC1([C@@H](N2[C@H](S1)[C@@H](C2=O)NC(=O)[C@@H](c3ccc(cc3)O)NC(=O)N4CCN(C4=O)/N=C/c5ccco5)C(=O)O)C	0.2	3.61		0.92	1.3	Wise, R.; Cadge, B.; Gillett, A. P.; Bhamjee, A.; Livingston, R.; Welling, P. G.; Thornhill, D. P. Pharmacokinetics of Bay k 4999, a new broad-spectrum penicillin. Antimicrobial Agents and Chemotherapy (1979), 15(5), 670-3.	Bay k 4999. N=6 healthy male volunteer, 76 kg average weight, 2 g dose. VDss reported as 20.1% of body weight. MRT from VDss and clearance.		1978	570.57	14	4	185.4	7	anionic	1.4	-2
Gabapentin	60142-96-3	NCC1(CC(=O)O)CCCCC1	0.71	1.7	0.97	7	5.3	Vollmer KO, Anhut H, Thomann P, Wagner F, and Jahnchen D (1989) Pharmacokinetic model and absolute bioavailability of the new anticonvulsant gabapentin. Adv. Epileptol. 17: 209-211. Neurontin Product Label.			1976	171.24	3	2	63.3	3	zwitterionic	0.55	-1.7
Gadobenate	113662-23-0	[N]1(CC(=O)[O-])([Gd+3]2[N@@](CC1)(CC[N@@]2([C@@H](C([O-])=O)COCc1ccccc1)CC(=O)[O-])CC([O-])=O)CC(=O)[O-]	0.21	1.6	1	2.2	1.81	Gadobenate Dimeglumine - FDA Approval Package Clinical Pharmacology and Biopharmaceutics Review 021357/S-000. Accessed through Pharmapendium. Ppb: PDR states: In vitro studies showed no appreciable binding of gadobenate ion to human serum proteins. http://www.pdr3d.com/detail.php?c=109299#section-14. Accessed December 27 2014.	N=4, 0.3 mmol/kgh dose. MRT from VDss and cleranace. Structure and CAS referring to gadobenic acid dianion.	Gadobenate Dimeglumine - FDA Approval Package Clinical Pharmacology and Biopharmaceutics Review 021357/S-000. Accessed through Pharmapendium	1988	665.71	14	0	209.9	14	n/a	n/a	n/a
Gadobutrol	770691-21-9	[Gd+3]1234567OC([C@@H](CO)[N]81CC[N]4(CC[N]3(CC[N]2(CC8)CC(=O)[O-]6)CC(=O)[O-]5)CC(=O)[O-]7)CO	0.22	2	1	1.8	1.3	Gadobutrol - FDA Approval Package Clinical Pharmacology and Biopharmaceutics Review 201277/S-000 Part 03. Accessed through Pharmapendium. Ppb: PDR states: Gadobutrol does not display any particular protein binding. http://www.pdr3d.com/detail.php?c=123580#section-14. Accessed december 27 2014.	N=24, doses from 0.05 to 0.4 mmol/kg averaged across all groups. VDss from MRT and clearance.	Gadobutrol - FDA Approval Package Clinical Pharmacology and Biopharmaceutics Review 201277/S-000 Part 03. Accessed through Pharmapendium	1991	603.7	13	2	134.8	2	n/a	n/a	n/a
Gadodiamide	131410-48-5	CNC1=O[Gd+3]234567N(CCN2(C1)CC(=O)[O-]3)(CCN4(CC(=O5)NC)CC(=O)[O-]6)CC(=O)[O-]7	0.2	1.79		1.85	1.46	van Wagoner, M., O'Toole, M., Worah, D., Leese, P. T., Quay, S. C. A Phase I clinical trial with gadodiamide injection, a nonionic magnetic resonance imaging enhancement agent. Invest. Radiol., 1991, 11, 980-986.	DV7572. Omniscan. Renal clearance 98% of total. Data digitized and PK parameters calculated via PKSolver. Average of 0.1 mmol/kg and 0.3 mmol/kg doses, expressed as Gd (atomic weight 157.25). N=5/dose. AUC reported within 6 and 11% of calculated at 0.1 mmol/kg and 0.3 mmol/kg, respectively.		1990	576.68	13	5	131.8	0	n/a	n/a	n/a
Gadofosveset	742680-48-4	C(C([N+]([Gd+++]([N+]1(C2)C3)([N+](C2)(C2)C4)([O-]5)([O-]6)([O-]C3=O)([O-]C4=O)[O-]C2=O)(CC6=O)CC5=O)C1)C(=CC=C1OCC)C=C1	0.15	0.1	0.16	22.7	16.3	PDR Accessed on March 15 2013. http://www.pdr3d.com/detail.php?c=7685#section-13	0.03 mmol/kg dose. VDss from MRT and clearance.	PDR Accessed on March 15 2013. http://www.pdr3d.com/detail.php?c=7685#section-13	2014	679.73	14	0	151.1	4	n/a	n/a	n/a
Gadopentetate	80529-93-7	O=C1C[N]23CC[N]45CC(=O)[O-][Gd+3]2424([O-]1)([O-]C(=O)C5)[O-]C(=O)C[N]2(CC3)CC(=O)[O-]4	0.27	1.94	1	2.3	1.6	PDR Accessed March 15 2013 http://www.pdr3d.com/detail.php?c=63841#section-4	VDss from MRT and clearance.	PDR Accessed March 15 2013. http://www.pdr3d.com/detail.php?c=63841#section-4	1982	545.56	13	0	141.9	0	n/a	n/a	n/a
Gadoteridol	120066-54-8	[N]123CC[N]45CC[N]67CC[N]8(CC1)CC(=O)[O-][Gd+3]3578([OH]C(C2)C)([O-]C(=O)C4)[O-]C(=O)C6	0.2	1.5		2.2	1.6	PDR accessed August 08 2013 http://www.pdr3d.com/detail.php?c=49389#section-4. ppb: PDR states It is unknown if protein binding of ProHance occurs in vivo. But no information on in vitro data is reported. http://www.pdr3d.com/detail.php?c=50092#section-4. Accessed december 27 2014.	VDss from MRT and clearance.	http://www.pdr3d.com/detail.php?c=49389#section-4	1988	558.68	11	1	97.9	0	n/a	n/a	n/a
Gadoversetamide	131069-91-5	COCCNC1=O[Gd+3]234567O=C(CN2(CCN3(CCN4(CC(=O)[O-]5)C1)CC(=O)[O-]6)CC(=O)[O-]7)NCCOC	0.16	1.2	1	2.2	1.7	OptiMARK Product Label.			1990	664.79	15	5	150.2	6	n/a	n/a	n/a
Gadoxetate	770677-60-6	C(C([N+]([Gd+++]([N+]1(C2)C3)([N+](C2)(C2)C4)([O-]5)([O-]6)([O-]C3=O)([O-]C4=O)[O-]C2=O)(CC6=O)CC5=O)C1)C(=CC=C1OCC)C=C1	0.21	3.57	0.9	1	0.95	PDR accessed March 15 2013 http://www.pdr3d.com/detail.php?c=89667#section-13	VDss from MRT and clearance. Ppb < 10%. CAS number of disodium salt = 135326-22-6		2009	679.73	14	0	151.1	4	n/a	n/a	n/a
GAL-021	1380341-99-0	CCCNc1nc(NCCC)nc(n1)N(C)OC	2.17	11.9		3.04	5.61	J. F. McLeod, J. M. Leempoels, S. X. Peng, S. L. Dax, L. J. Myers and F. J. Golder. GAL-021, a new intravenous BKCa-channel blocker, is well tolerated and stimulates ventilation in healthy volunteers. Br. J. Anaesth. 2014, 113, 875-883.	Data reported as average of 24 subject (bottom line in Table 4) across cohorts 1-3 and period 1-9. Very tight data across all doses cohorts. MRT from VDss and clearance.		2012	254.33	7	2	75.2	8	neutral	2.3	2.3
Galanthamine	357-70-0	COc1ccc2CN(C)CC[C@@]34C=C[C@H](O)C[C@@H]3Oc1c24	2.3	5.6	0.83	6.8	5.3	Westra P, van Thiel MJS, Vermeer GA, Soeterbroek AM, Scaf AH, and Claessens HA (1986) Pharmacokinetics of galanthamine (a long-acting anticholinesterase drug) in anaesthetized patients. Br. J. Anaesth. 58: 1303-1307. Bickel U, Thomsen T, Weber W, Fischer JP, Bachus R, Nitz M, and Kewitz H (1991) Pharmacokinetics of galanthamine in humans and corresponding cholinesterase inhibition. Clin. Pharmaco…			1951	287.35	4	1	41.9	1	cationic	1.8	1.1
Gallamine triethiodide	65-29-2	CC[N+](CC)(CC)CCOc1cccc(c1OCC[N+](CC)(CC)CC)OCC[N+](CC)(CC)CC	0.27	1.51		2.98	2.52	M.I. Ramzan, E. J. Triggs, C. A. Clarks. Pharmacokinetics studies in man with gallamine triethiodide. Eur. J. Clin. Pharmacol. 1980, 17, 145-152.	CAS number corresponding to gallamine triethiodide used. Iodide atoms removed to keep only SMILES for trication neuromuscular blocker. N=14 with data entered as average of single 4 and 6 mg iv bolus dose. MRT from VDss and clearance.		1947	510.82	6	0	27.7	21	neutral	-7.7	-7.7
Gallopamil	16662-47-8	c1([C@@](CCC[N@@](CCc2cc(c(OC)cc2)OC)C)(C(C)C)C#N)cc(c(OC)c(c1)OC)OC	1.75	14.3	0.07	2.04	1.8	Eichelbaum M. Pharmakokinetik und Metabolismus von. Gallopamil. Zeitschrift ftir Kardiologie 78 (Suppl. 5): 20-24, 1989. ppB; Stieren, B.; Buehler, V.; Hege, H. G.; Hollmann, M.; Neuss, H.; Schlepper, M.; Weymann, J. Edited by Kaltenbach, Martin; Hopf, Ruediger Gallopamil: Pharmakol. Klin. Wirkungsprofil Kalziumantagonisten (1983), 90-96. From abstract in English.	Data digitized from plot in figure 4. 70 kg average weight assumed. 2 mg dose iv bolus. N=12. Reported AUC 29.6 ng.hr/mL. Reported clearance 1.2 L/min.		1963	484.63	7	0	73.2	15	cationic	4.3	2.8
Gambogic acid	2752-65-0	C1(=O)[C@@]2(C\C=C(\C)C(=O)O)[C@@]34Oc5c(c6c(c(c5C(C3=C[C@@H]1C[C@@H]4C(O2)(C)C)=O)O)C=C[C@](O6)(CC\C=C(\C)C)C)C\C=C(\C)C	0.99	1.24		13.3	14.6	Data digitized from plot reported in Determination of gambogic acid in human plasma by liquid chromatography-atmospheric pressure chemical ionization–mass spectrometr y Li Ding , Di Huang, Jinwan Wang b Shuting Li. Journal of Chromatography B, 846 (2007) 112–118	AUC0-inf reported 12660 ug.hr.L, N=6, 35 mg/m2. AUC0-inf calculated within 10% of reported. 1.73m2/70kg conversion factor.		1955	628.75	8	2	119.4	8	anionic	7.9	4.9
Ganciclovir	82410-32-0	NC1=Nc2c(ncn2COC(CO)CO)C(=O)N1	1	4.6	0.99	3.7	3.7	Anderson RD, Griffy KG, Jung D, Dorr A, Hulse JD, and Smith RB (1995) Ganciclovir absolute bioavailability and steady-state pharmacokinetics after oral administration of two 3000 mg/d dosing regimens in human immunodeficiency virus and cytomegalovirus seropositive patients. Clin. Ther. 17: 425-432. Aweeka FT, Gambertoglio JG, Kramer F, van der Horst C, Polsky B, Jayewardene A, Lizak P, Emrick L, …			1982	255.23	9	4	135	5	neutral	-2.6	-2.6
Ganglioside GM1	37758-47-7	O([C@@H]1[C@@H]([C@H]([C@H](O[C@@H]2[C@H](O[C@@H](OC[C@@H]([C@@H](\C=C\CCCCCCCCCCCCC)O)NC(CCCCCCCCCCCCCCCCC)=O)[C@@H]([C@H]2O)O)CO)O[C@@H]1CO)O)OC[C@@H]([C@@H]([C@H]1[C@@H]([C@H](C[C@](O1)(C(O)=O)O)O)NC(C)=O)O)O)[C@H]1[C@@H]([C@H]([C@@H](O)[C@H](O1)CO)O[C@@H]1O[C@@H]([C@H](O)[C@@H]([C@H]1O)O)CO)NC(C)=O	0.07	0.02		55	77.4	Rost, K. Ludwig; Brockmoeller, Juergen; Weber, Willi; Roots, Ivar. Multiple-dose pharmacokinetics of ganglioside GM1 after intravenous and intramuscular administration to healthy volunteers. Clin. Pharmacol. Ther. 1991, 50, 141-149.	Ganglioside A2. Ganglioside G4. Ganglioside GM1A. N=3 subjects, 21 d dosing at 100 mg/day iv. 68.8 kg average weight. No data reported but indication that the compound is very highly bound to plasma proteins.		1969	1546.82	34	20	540.6	52	anionic	-0.53	-4
Ganirelix	124904-93-4	N([C@@H](C(=O)N[C@H](C(N[C@H](C(N[C@@H](C(N[C@@H](C(=O)N[C@@H](C(N[C@H](C(N[C@H](C(=O)N1[C@H](C(N[C@@H](C(N)=O)C)=O)CCC1)CCCC\N=C(\NCC)NCC)=O)CC(C)C)=O)CCCC\N=C(/NCC)NCC)Cc1ccc(cc1)O)=O)CO)=O)Cc1cccnc1)=O)Cc1ccc(cc1)Cl)Cc1ccc2c(c1)cccc2)C(=O)C	0.21	0.63	0.18	5.61	9.09	Oberyé JJ, Mannaerts BM, Kleijn HJ, Timmer CJ. Pharmacokinetic and pharmacodynamic characteristics of ganirelix (Antagon/Orgalutran). Part I. Absolute bioavailability of 0.25 mg of ganirelix after a single subcutaneous injection in healthy female volunteers. Fertil Steril. 1999 Dec;72(6):1001-1005.	19 female volunteers, 63.1 kg average weight, 0.25 mg dose. Data digitized from plot reported. AUC (0-inf) reported as 105 ng.h.mL-1; calculated value 104.6 ng.h.mL-1. Difference < 1%.		1989	1570.32	31	16	451.5	48	cationic	5.7	3.4
Garenoxacin	194804-75-6	[H]N1Cc2cc(ccc2[C@H]1C)c1ccc2C(C(=CN(C3CC3)c2c1OC(F)F)C(=O)O[H])=O	1	1.23	0.25	13.7		Hayakawa, Hiroyoshi; Fukushima, Yoko; Kato, Hiroshi; Fukumoto, Hiroyuki; Kadota, Takumi; Yamamoto, Hiroyuki; Kuroiwa, Hiroyuki; Nishigaki, Junko; Tsuji, Akira. (2003) Metabolism and disposition of novel des-fluoro quinolone garenoxacin in experimental animals and an interspecies scaling of pharmacokinetic parameters. Drug Metab. Disp. 31 (11) 1409-1418.	Also known as ganefloxacin and T 3811. Human data reported from a presentation bY Gajjar, D. et al at 2001 ICAAC. Average weight taken as 70 kg. MRT from VDss and Cl. Data to be confirmed.		1997	426.41	6	2	78.9	6	zwitterionic	3.4	1.1
Gatifloxacin	112811-59-3	COc1c(N2CCNC(C)C2)c(F)cc3C(=O)C(=CN(C4CC4)c13)C(=O)O	1.7	2.8	0.8	11	10	Gajjar DA, LaCreta FP, Uderman HD, Kollia GD, Duncan G, Birkhofer MJ, and Grasela DM (2000) A dose-escalation study of the safety, tolerability, and pharmacokinetics of intravenous gatifloxacin in healthy adult men. Pharmacotherapy 20: 49S-58S. Perry C, Balfour J, and Lamb H (1999) Gatifloxacin. Drugs 58: 683-698.			1987	375.39	7	2	82.1	4	zwitterionic	2.1	-0.65
Gavestinel	153436-22-7	[H]N(C(C=Cc1c2c(cc(cc2n([H])c1C(=O)O[H])[Cl])[Cl])=O)c1ccccc1	0.12	0.089	0.002	22.47		Iavarone L et al. First time in human for GV196771: interspecies scaling applied on dose selection. J Clin Pharmacol, 1999, 39, 560-566.	Data from 100 mg iv dose, 70 Kg weight. MRT calculated from CL and VDss. GV150526. fu reported as fu% but unlikely to be %. Likely to be fu.		1993	375.21	5	3	82.2	5	anionic	4.6	1.8
Gefitinib	184475-35-2	COc1cc2ncnc(Nc3ccc(F)c(Cl)c3)c2cc1OCCCN4CCOCC4	23	12	0.089	32	34	Swaisland, HC, Smith RP, Laight A, Kerr DJ, Ranson M, Wilder-Smith CH, and Duvauchelle T (2005) Single-dose clinical pharmacokinetics studies of gefitinib. Clin. Pharmacokinet. 44: 1165-1177. McKillop D, Hutchison M, Partridge EA, Bushby N, Cooper CMF, Clarkson-Jones JA, Herron W, and Swaisland HC (2004) Metabolic disposition of gefitinib, an epidermal growth factor receptor tyrosine kinase inhib…			1986	446.9	7	1	68.7	8	cationic	4.3	3.9
Gemcitabine	95058-81-4	NC1=NC(=O)N(C=C1)[C@@H]2O[C@H](CO)[C@@H](O)C2(F)F	1.5	32	1	0.81	1	Paitnik A, Eckhardt SG, Izbicka E, Tolcher AA, Hammond LA, Takimoto CH, Schwartz G, McCreery H, Goetz A, Mori M, terada K, Gentner L, Rybak ME, Richards H, Zhang S, and Rowinsky EK (2003) A phase I pharmacokinetic, and biological study of the farnesyltransferase inhibitor tipifarnib in combination with gemcitabine in patients with advanced malignancies. Clin. Canc. Res. 9: 4761-4771. Gemzar Produ…	Parameters calculated from data obtained by digitization of the plot provided in the reference.		1984	263.2	7	3	108.4	2	neutral	-1.9	-1.9
Gemifloxacin	175463-14-6	CO/N=C/1\CN(CC1CN)c2c(cc3c(=O)c(cn(c3n2)C4CC4)C(=O)O)F	3.52	7.2	0.3	8.1	8.3	PP. Gemifloxacin Mesylate - FDA Approval Package Microbiology Review 021158/S-000 Part 07. Table 8.	N=23, 250 mg dose, 70 kg assumed. MRT from VDss and Cl. ppb from label.		1995	389.38	9	2	123	5	zwitterionic	1.7	-0.26
Genaconazole	120924-80-3	C[C@@H]([C@@](O)(Cn1cncn1)c2ccc(F)cc2F)S(=O)(=O)C	0.62	0.19		54	49	Mojavrian P, Radwanski E, Affirme MB, Cayen MN, and Lin CC (1994) Pharmacokinetics of the triazole antifungal agent genaconazole in healthy men after oral and intravenous administration. Antimic. Agents Chemother. 38: 2758-2762.	VDss calculated from digitized plots.		1989	331.34	6	1	85.1	5	neutral	-0.18	-0.18
Gentamicin	1403-66-3	CN[C@@H]1[C@@H](O)[C@@H](O[C@H]2[C@H](N)C[C@H](N)[C@@H](O[C@H]3O[C@@H](CC[C@H]3N)[C@@H](C)N)[C@@H]2O)OC[C@]1(C)O	0.33	1	1	5.5	4.7	Bertino JS, Booker LA, Franck P, and Rybicki B (1991) Gentamicin pharmacokinetics in patients with malignancies. Antimic. Agents Chemother. 35: 1501-1503. Gordon RC, Regamey C, and Kirby WMM (1972) Serum protein binding of the aminoglycoside antibiotics. Antimic. Agents Chemother. 2: 214-216.			1963	463.57	12	8	213.7	6	cationic	-4.1	-7.1
Gestodene	60282-87-3	CC[C@]12CC[C@H]3[C@@H](CCC4=CC(=O)CC[C@H]34)[C@@H]1C=C[C@@]2(O)C#C	0.46	0.8	0.023	9.6	10	Tauber U, Tack JW, and Matthes H (1989) Single dose phakmacokinetics of gestodene in women after intravenous and oral administration. Contraception 40: 461-476. Kuhnz W, Pfeffer M,and Al-Yacoub G (1990) Protein binding of the contraceptive steroids gestodene, 3-keto-desogestrel and ethinylestradiol in human serum. J. Steroid Biochem. 35: 313-318. Gui LQ and Humpel M (1990) Serum protein binding c…	VDss deteremined from Cvs t data obtained by digitization of plots in Tauber, 1989. Protein binding very different in two reports: 0.006 in Kuhnz et al vs 0.04 in Gui and Humpel; value entered is the average.		1977	310.43	2	1	37.3	2	neutral	4.1	4.1
GHRP-6	87616-84-0	c1(c[nH]c2c1cccc2)C[C@@H](C(N[C@@H](C(N[C@H](C(=O)N)CCCCN)=O)Cc1ccccc1)=O)NC([C@@H](NC([C@H](NC([C@H](Cc1[nH]cnc1)N)=O)Cc1c[nH]c2c1cccc2)=O)C)=O	0.42	3.1		2.45	2.46	Pharmacokinetic study of Growth Hormone-Releasing Peptide 6 (GHRP-6) in nine male healthy volunteers Cabrales, Ania; Gil, Jeovanis; Fernandez, Eduardo; Valenzuela, Carmen; Hernandez, Francisco; Garcia, Idrian; Hernandez, Ariadna; Besada, Vladimir; Reyes, Osvaldo; Padron, Gabriel; Berlanga, Jorge; Guillen, Gerardo; Gonzalez, Luis Javier European Journal of Pharmaceutical Sciences 48 (2013) 40–46	Data reported in Table 3. 100, 200, 400 ug/kg iv N=3 per dose. Average of all data.His-( -Trp)-Ala-Trp-( -Phe)-Lys-NH2, MW = 872.44 Da. Reported clearance 0.19, 0.17 and 0.20 L/h/kg, respectively.		1983	873.01	18	11	300.9	23	cationic	0.42	-2.4
Ginkgolide A	15291-75-5	C[C@@H]1C(=O)O[C@H]2C[C@@]34[C@H]5C[C@@H](C(C)(C)C)C36[C@@H](OC(=O)[C@@H]6O)OC4(C(=O)O5)[C@@]12O	0.62	2.3		4.6	3.8	Fourtillian JB, Brisson AM, Girault J, Ingrand I, Decourt JP, Drieu K, Jouenne P, and Biber A. Proprietes pharmaccinetiques du bilobalide et des ginkgolides A et B chez le sujet sain apres administrations intraveineuses et orales d'extrait de Ginkgo biloba (EGb 761). Therapie 1995, 50, 137-144.			1967	408.4	9	2	128.6	0	neutral	-3.3	-3.4
Ginkgolide B	15291-77-7	C[C@@H]1C(=O)O[C@H]2[C@H](O)C34[C@H]5C[C@@H](C(C)(C)C)C36[C@@H](OC(=O)[C@@H]6O)OC4(C(=O)O5)[C@@]12O	0.91	2.3	0.8	6.6	5.2	Fourtillian JB, Brisson AM, Girault J, Ingrand I, Decourt JP, Drieu K, Jouenne P, and Biber A (1995) Proprietes pharmaccinetiques du bilobalide et des ginkgolides A et B chez le sujet sain apres administrations intraveineuses et orales d'extrait de Ginkgo biloba (EGb 761). Therapie 50: 137-144. ppb: Protein binding ratio of Ginkgolide B in plasma Chen, Wei-dong; Liang, Yan; Xie, Lin; Wang, Lei; W…			1967	424.4	10	3	148.8	0	neutral	-4.3	-4.5
Ginsenoside RD	52705-93-8	C[C@@]12[C@@H]([C@]3(C)[C@@H](CC2)C(C)(C)[C@H](CC3)O[C@H]2[C@H](O[C@@H]3O[C@H](CO)[C@H]([C@@H]([C@H]3O)O)O)[C@@H](O)[C@@H]([C@H](O2)CO)O)C[C@H]([C@H]2[C@@]1(C)CC[C@@H]2[C@@](O[C@@H]1O[C@H](CO)[C@H]([C@@H]([C@H]1O)O)O)(CCC=C(C)C)C)O	0.11	0.09		20.2	18.5	Pharmacokinetics and Safety of Ginsenoside Rd Following a Single or Multiple Intravenous Dose in Healthy Chinese Volunteers. Xing Zeng, PhD, Yuanhui Deng, BS, Yi Feng, MS, Yiming Liu, PhD, Liu Yang, MS, Yu Huang, MS, Jing Sun, BS, Weixiong Liang, MD, and Yongyuan Guan, MD. J. Clin. Pharmacol. 2010, 50, 285-292.	VDss calculated from reported clearance and MRT. 10, 40 and 75 mg doses, N=10 each cohort. Average values taken.		1974	947.15	18	12	298.1	13	neutral	-0.39	-0.39
Gisadenafil	334826-98-1	C(C)c1c2c(nn1CCOC)c(=O)nc([nH]2)c1c(OCC)ncc(c1)S(=O)(=O)N1CCN(CC1)CC	2.4	14.3		2.8	4	Kenny J. Watson, John Davis, and Hannah M. Jones. Application of Physiologically Based Pharmacokinetic Modeling to Understanding the Clinical Pharmacokinetics of UK-369,003. Drug Metabolism and Disposition 2011, 39, 1203–1213.	UK-369,003. MRT from VDss and Cl. 70 kg assumed for clearance. 1 mg/kg dose		2001	519.62	12	1	135.5	10	cationic	0.96	0.26
Glibornuride	26944-48-9	Cc1ccc(cc1)S(=O)(=O)NC(=O)N[C@H]2[C@H]3CC[C@@]([C@H]2O)(C3(C)C)C	0.27	0.34		13	9.2	K. STOECKEL, V. TRUEB, U. C. DUBACH, R. C. HEINTZ, V. ASCALONE, I. FORGO, U. HENNES. Lack of effect of tenoxicam on glibornuride kinetics and response. Br. J. clin. Pharmac. (1985), 19, 249-254	20 mg dose, N=8, 69.4 kg average weight.MRT from clearance and VDss		1968	366.48	6	3	95.5	3	anionic	2.4	0.62
Gliclazide	21187-98-4	C1[C@@H]2[C@@H](CN1NC(NS(c1ccc(C)cc1)(=O)=O)=O)CCC2	0.43	0.41	0.03	17.5	16.4	Complete bioavailability and lack of food-effect on pharmacokinetics of gliclazide 30 mg modified release in healthy volunteers Delrat, P.; Paraire, M.; Jochemsen, R. Biopharmaceutics & Drug Disposition (2002), 23(4), 151-157. ppb: (from abstract in English) Xu, Shanshan; Xue, Yuehua; Tian, Ziyou; Chen, Saizhen; Wang, Zhichao; Wang, Renye. Effect of irbesartan on the plasma protein binding rate o…	N=2, 73 kg reported average weight. MRT = VDss/CL.		1968	323.41	6	2	78.5	3	anionic	1.7	0.2
Glimepiride	93479-97-1	CCC1=C(C)CN(C(=O)NCCc2ccc(cc2)S(=O)(=O)NC(=O)N[C@@H]3CC[C@@H](C)CC3)C1=O	0.19	0.5	0.005	6.3	10	Badian M, Korn A, Lehr KH, Malerczyk V, and Waldhaust W (1994) Absolute bioavailability of glimepiride (Amaryl) after oral administration. Drug Metab. Drug Inter. 11: 331-339. Amaryl Product Label.	Parameters calculated from C vs t data digitized from a plot provided in the reference. Data reported in the table in the reference did not correspond to data obtained from the plot.		1988	490.62	9	3	124.7	7	anionic	4.2	2.1
Glipizide	29094-61-9	Cc1cnc(cn1)C(=O)NCCc2ccc(cc2)S(=O)(=O)NC(=O)NC3CCCCC3	0.16	0.56	0.02	4.8	3.3	Pentikainen PJ, Neuvonen PJ, and Penttila A (1983) Pharmacokinetics and pharmacodynamics of glipizide in health volunteers. Int. J. Clin. Pharmacol. Ther. Toxicol. 21: 98-107. Fuccella LM, Tamassia V, and Valzelli G (1973) Metabolism and kinetics of the hypoglycemic agent glipizide in man--comparison with glibenclamide. J. Clin. Pharmacol. New Drugs 13: 68-75.			1970	445.54	9	3	130.1	7	anionic	2.1	0.0081
Gludopa	52370-58-8	c1(cc(C[C@H](NC(=O)CC[C@@H](C(O)=O)N)C(O)=O)ccc1O)O	0.21	4.6		0.74	0.5	Y. A. BOATENG, H. E. BARBER, T. M. MacDONALD, J. C. PETRIE & M. R. LEE. Disposition of y-glutamyl levodopa (gludopa) after intravenous bolus injection in healthy volunteers. Br. J. clin. Pharmac. (1991), 31, 419-422	Average of 100 and 250 u/kg doses, N=5 per cohort.		1974	326.3	9	6	170.2	8	anionic	-1.1	-5.9
Glufosfamide	132682-98-5	P(O[C@H]1[C@@H]([C@H]([C@H](O)[C@H](O1)CO)O)O)(=O)(NCCCl)NCCCl	0.24	1.6	0.71	2.49	2.37	Data (N=13, doses 3200-6000 mg/m2 6h i.v. infusion) reported in Table 5 in Shimizu, Toshio; Okamoto, Isamu; Tamura, Kenji; Satoh, Taroh; Miyazaki, Masaki; Akashi, Yusaku; Ozaki, Tomohiro; Fukuoka, Masahiro; Nakagawa, Kazuhiko. Phase I clinical and pharmacokinetic study of the glucose-conjugated cytotoxic agent d-19575 (glufosfamide) in patients with solid tumors. Cancer Chemotherapy and Pharmacol…	Data as weighted average of three doses across 13 patients (3,200/4,500/6000 mg/m2, N-3/7/3). Conversion factor used 1.73m2/70 kg. 6-hour infusion. Also reported as D 19575		1990	383.16	9	6	140.5	9	neutral	-2.3	-2.3
Glyburide	10238-21-8	COc1ccc(Cl)cc1C(=O)NCCc2ccc(cc2)S(=O)(=O)NC(=O)NC3CCCCC3	0.08	0.82	0.021	1.6	2.2	Jonsson A, Chan JCN, Rydberg T, Vaaler S, Hallengren B, Cockram CS, Critchley JAJH, and Melander A (2000) Pharmacodynamics and pharmacokinetics of intravenous glibenclamide in Caucasian and Chinese patients with type-2 diabetes. Eur. J. Clin. Pharmacol. 55: 721-727. Spraul M, Streeck A, Nieradzik M, and Berger M (1989) Uniform elimination pattern for glibenclamide in healthy caucasian males. Arz.…	glibenclamide		1966	494	8	3	113.6	8	anionic	4.1	2
Glyceryl 1-nitrate	624-43-1	C([C@@H](CO)O)O[N+](=O)[O-]	0.76	3.63		4.12	2.5	H. LAUFEN, M. LEITOLD. Glyceryl-1-nitrate pharmacokinetics in healthy volunteers. Br. J. Clin. Pharmac. (1987), 23, 287-293.	N=10, 20 mg kg dose administered via 1hr infusion, 77.9 kg average weight.		1949	137.09	6	2	92.8	4	neutral	-0.51	-0.51
Glycopyrrolate bromide	596-51-0	C(C1CCCC1)(c1ccccc1)(C(=O)OC1C[N+](CC1)(C)C)O.[Br-]	0.37	16.8		0.37	0.65	Penttilä J et al. Pharmacokinetic-pharmacodynamic model for the anticholinergic effect of glycopyrrolate. Eur J Clin Pharmacol, 2001, 57, 153-158	Data from Table 1. micro dose (5 µg/kg), N=8, 3 compartments. MRT calculated from VDss and CL. T1/2 compartment 3. Body weights 60-80kg.	CL renal ~68%	1960	398.33	4	1	46.5	5	neutral	-0.23	-0.23
Glycyrrhizin	1405-86-3	C1([C@H]2[C@@]([C@@]3(C([C@H]4[C@@](CC[C@@](C4)(C(O)=O)C)(C)CC3)=C1)C)(CC[C@@H]1[C@@]2(CC[C@@H](C1(C)C)O[C@@H]1[C@H](O[C@@H]2O[C@@H]([C@@H](O)[C@@H]([C@H]2O)O)C(O)=O)[C@H]([C@H](O)[C@H](O1)C(O)=O)O)C)C)=O	0.06	0.13		7.83	8.83	Tekla G.J. van Rossum, MD, Arnold G. Vulto, PhD, Wim C. J. Hop, MSc, PhD, Solko W. Schalm, MD, PhD Pharmacokinetics of Intravenous Glycyrrhizin After Single and Multiple Doses in Patients with Chronic Hepatitis C Infection. CLlNICALTHERAPEUTICS, 1999,21, 2080-2090	Weighted average over 4 doses (80, 160, 200, 240) from table II (Day1). N=33 overall.		1880	822.93	16	8	267	7	anionic	1.5	-7.5
GPX-150	236095-29-7	C[C@H]1[C@H]([C@H](C[C@@H](O1)O[C@H]2C[C@@](Cc3c2c(c4c(c3O)C(=O)c5cccc(c5C4=N)OC)O)(C(=O)CO)O)N)O	15.45	15		17.16	13.8	Sarah A. Holstein, James C. Bigelow, Richard D. Olson, Robert E. Vestal, Gerald M. Walsh , Raymond J. Hohl. Phase I and pharmacokinetic study of the novel anthracycline derivative 5-imino-13-deoxydoxorubicin (GPX-150) in patients with advanced solid tumors. Invest New Drugs (2015) 33:594–602	N=7, 256 mg/m2 dose, iv infusion, multiple cycles. 1.73m2/70 kg conversion factor used. MRT from VDss and clearance.	imino derivative of doxorubicin	1999	542.53	12	7	212.8	5	cationic	0.036	-2.9
Granisetron	109889-09-0	CN1[C@@H]2CCC[C@H]1C[C@H](C2)NC(=O)c3nn(C)c4ccccc34	3.7	9.1	0.35	6.7	5.2	Allen A, Asgill CC, Pierce DM, Upward J, and Zussman BD (1994) Pharmacokinetics and tolerability of ascending intravenous doses of granisetron, a novel 5-HT3 antagonist, in healthy human subjects. Eur. J. Clin. Pharmacol. 46: 159-162. Kytril Product Label.	VDss calculated from CL and MRT provided in Allen, et al., 1994.		1988	312.41	5	1	50.2	2	cationic	2.8	1.2
Grepafloxacin	119914-60-2	c1(c(c2c(c(F)c(cc2n(c1)C1CC1)N1C[C@@H](C)NCC1)C)=O)C(=O)O		5.9	0.82		9.2	PP. Grepafloxacin Hydrochloride - FDA Approval Package Review 020695 ppb: Clinical Pharmacology and Biopharmaceutics . Determination of protein binding of gyrase inhibitors by means of continuous ultrafiltration G Zlotosa, M Oehlmannb, P Nickelb, U Holzgrabe. Journal of Pharmaceutical and Biomedical Analysis, 1998, 18, 847–858	N=5/dose, 100 and 200 mg iv dose. No VDss reported.		1988	359.39	6	2	74.6	3	zwitterionic	2.8	-0.015
GSK1322322	1152107-25-9	N1(C(COCC1)CN(C1)C(=C(C(=NC2C)NNC(C(CC3CCCC3)CN(C=O)O)=O)F)N=2)C1	0.75	5.6		2.2	4.2	Donna Mamaril-Fishman, John Zhu, Min Lin, Clive Felgate, Lori Jones, Patrick Stump,Esaie Pierre, Chester Bowen, Odin Naderer, Etienne Dumont, Parul Patel, Peter D. Gorycki, Bo Wen, Liangfu Chen, and Yanli Deng. Investigation of Metabolism and Disposition of GSK1322322, a PDF Inhibitor, in Healthy Humans Using Entero-Test® For Biliary Sampling. Drug Metab Dispos 2014 42:1314-1325	Lanopepden. 70 kg weight assumed. 1000 mg iv dose over 1 hr infusion. MRT from VDss and clearance. Data from table 2. See also, Naderer, O. J. et al. J. Clin. Pharmacol. 2013, 53, 1168-1175.		2009	479.55	11	3	123.2	8	cationic	-0.21	-1.2
GSK2140944	1075236-89-3	c1cc(=O)n2c3c1ncc(=O)n3[C@@H](C2)CN4CCC(CC4)NCc5cc6c(cn5)OCCC6	2.7	9.23		4.86	12.6	Negash, Kitaw; Andonian, Clara; Felgate, Clive; Chen, Cathy; Goljer, Igor; Squillaci, Bianca; Nguyen, Dung; Pirhalla, Jill; Lev, Mally; Schubert, Ernest; Tiffany, Courtney; Hossain, Mohammad; Ho, May. The metabolism and disposition of GSK2140944 in healthy human subjects. Xenobiotica, 2016, 46, 683-702	Gepotidacin. 1000 mg, 2 hr infusion, data in mL/min/kg and L/kg reported by authors on a 70 kg basis. MRT calculated as VDss/clearance.	59% excreted unchanged in urine from iv dose.	2008	448.52	9	1	94.3	5	cationic	-0.75	-2.5
GSK2239633	1240516-71-5	COc1cccc2c1c(NS(=O)(=O)c3ccc(Cl)s3)nn2Cc4cccc(CNC(=O)C(C)(C)O)c4	1.65	5.1		5.43	13.5	Cahn, Anthony; Hodgson, Simon; Wilson, Robert; Robertson, Jonathan; Watson, Joanna; Beerahee, Misba; Hughes, Steve C.; Young, Graeme; Graves, Rebecca; Hall, David; van Marle, Sjoerd; Solari, Roberto. Safety, tolerability, pharmacokinetics and pharmacodynamics of GSK2239633, a CC-​chemokine receptor 4 antagonist, in healthy male subjects: results from an open-​label and from a randomised study. BM…	microdose, 100 ug. N=6, average weight 71.9 kg. Also reported as GSK2239633A. Gem-dimethyl derivative = compound 7r in reference 28 cited by PK reference.		2010	549.06	9	3	122.6	8	anionic	3.2	1.2
GSK2251052	1093643-37-8	B1(c2c(cccc2OCCCO)[C@H](O1)CN)O	2.37	4.1		9.6	11.6	Gary D Bowers, David Tenero, Parul Patel, Phuong Huynh, James Sigafoos, Kathryn O’Mara, Graeme C Young, Etienne Dumont, Elizabeth Cunningham, Milena Kurtinecz, Patrick Stump, JJ Conde, John P Chism, Melinda J Reese, Yun Lan Yueh and John F Tomayko. Disposition and metabolism of GSK2251052 in humans: a novel boron-containing antibiotic. Drug Metabolism & Disposition (2013), 41(5), 1070-1081	Epetraborole. MRT from VDss and clearance. 1500 mg dose, 83.1 kg as average weight, N=6, 1 hour infusion.	GSK2251052 is metabolically eliminated. 98% radioactivity recovery (~90% urine, ~8 feces), with only 29% of dose as unchanged.	2008	237.06	5	3	84.9	5	cationic	-0.61	-3.7
GSK269984A	892664-17-4	c1cc(nc(c1)C(=O)O)Cc2cc(ccc2OCc3ccc(cc3F)Cl)Cl	0.77	2		6.4	8.15	Thor Ostenfeld, Claire Beaumont, Jonathan Bullman, Maria Beaumont, Phillip Jeffrey. Human microdose evaluation of the novel EP1 receptor antagonist GSK269984A. Br J Clin Pharmacol 2012, 74:6, 1033–1044.	GSK269984A free acid or GSK269984B. 100 ug. Microdose. N=5, average weight 81.6 kg. MRT from VDss and clearance. Structure and CAS number refer to free acid.		2006	406.23	4	1	59.4	6	anionic	6	3.2
GSK461364	929095-18-1	NC(C1=C(C=C(N(C2=C3)C=NC2=CC=C3CN4CCN(C)CC4)S1)O[C@H](C)C5=CC=CC=C5C(F)(F)F)=O	12	20		10	10.3	D. Olmos et al. Phase I Study of GSK461364, a Specific and Competitive Polo-like Kinase 1 Inhibitor, in Patients with Advanced Solid Malignancies. Clin Cancer Res 2011;17:3420-3430	Weighted average on the basis of PK data set. 25-300 mg total dose range. Once and twice weekly (the latter on day 1). N=37 patients for 72 PK sets. 4hr infusion.70 kg dose assumed. MRT from VDss and clearance.		2007	543.6	7	1	76.6	7	cationic	4.1	3
Guanfacine	29110-47-2	NC(=N)NC(=O)Cc1c(Cl)cccc1Cl	5.6	4.5	0.28	22	15	Carchman SH, Crowe JT, and Wright GJ (1987) The bioavailability and pharmacokinetics of guanfacine after oral and intravenous administration to healthy volunteers. J. Clin. Pharmacol. 27: 762-767.	CL and VDss were calculated from C vs t data obtained by digitization of the plot provided in the reference.		1969	246.09	4	3	79	3	cationic	1.3	0.17
Guanylcisteine	40454-21-5	N([C@H](C(O)=O)CS)C(N)=N	0.25	2.88		1.39	1.34	R. Cadórniga, E. Barcia, I. T. Molina, A. Galiano, J.A. Gutiérrez. Estudio farmacocinetico de la guanil-cisteina. Rev farmacol Clin Exp 1987, 4, 325-331.	N=10, 69.4 kg average weight, 600 mg dose. VDss from Vc and k12/k21. Clearance from dose and AUC.		1961	163.2	5	4	99.2	4	zwitterionic	-1.1	-3.4
Haloperidol	52-86-8	OC1(CCN(CCCC(=O)c2ccc(F)cc2)CC1)c3ccc(Cl)cc3	17	7.8	0.08	36	35	Holley FO, Magliozzi JR, Stanski DR, Lombrozo L, and Hollister LE (1983) Haloperidol kinetics after oral and intravenous administration. Clin. Pharmacol. Ther. 33: 477-484. Chang WH, Lam YWF, Jann MW, and Chen H (1992) Pharmacokinetics of haloperidol and reduced haloperidol in Chinese schizophrenic patients after intravenous and oral administration of haloperidol. Psychopharmacology 106: 517-522.…			1958	375.86	3	1	40.5	6	cationic	4.3	3.3
Heptaminol	372-66-7	CC(CCCC(C)(C)O)N	2.14	10.72		3.24	2.5	Von F. Kees, P. Pominiak und H. Grobecker. Untersuchungen zur Bioverfiigbarkeit von Heptaminol bei Probanden. Arzneim.-Forsch./Drug Res. 1987, 37, 1182-1185	N=10, 65 kg median weight reported. 250 and 300 mg dose, with essentially identical PK parameters. Data for the 250 mg dose taken. MRT from VDss and clearance		1948	145.24	2	2	46.3	3	cationic	1.4	-1.6
Heroin	561-27-3	CC(=O)Oc1ccc2c3c1O[C@@H]4[C@]35CC[N@@]([C@H](C2)[C@@H]5C=C[C@@H]4OC(=O)C)C	1.31	212.3		0.1	0.062	Elisabeth J. Rook, Jan M. van Ree, Wim van den Brink, Michel J. X. Hillebrand, Alwin D. R. Huitema, Vincent M. Hendriks, Jos H. Beijnen. Pharmacokinetics and Pharmacodynamics of High Doses of Pharmaceutically Prepared Heroin, by Intravenous or by Inhalation Route in Opioid-Dependent Patients. Basic & Clinical Pharmacology & Toxicology 2006, 98, 86–96.	N=11, 73 kg average weight reported. No actual dose reported. 930 L/h average clearance at "steady-state" after iv doses to "chasers" and VD as 96 L but without specification of type of volume. VD taken as Vbeta = VDss as seemingly showing 1 compartment behavior. T1/2 of terminal phase: 3.7 minutes. MRT = t1/2/0.693.		1906	369.41	6	0	65.1	4	cationic	1.9	1.1
Hexobarbital	56-29-1	CN1C(=O)NC(=O)C(C)(C2=CCCCC2)C1=O	1.1	3.4	0.53	5.4	4.9	Breimer DD, Honhoff C, Zilly W, Richter E, and van Rossum JM (1975) Pharmacokinetics of hexabarbital in man after intravenous infusion. J. Pharmacokinet. Biopharm. 3: 1-11. Zilly W, Breimer DD, and Richter E (1975) Induction of drug metabolism in man after rifampicin treatment measured by increased hexobarbital and tolbutamide clearance. Eur. J. Clin. Pharmacol. 9: 219-227. Zilly W, Breimer DD, a…			1927	236.27	5	1	66.5	1	neutral	1.8	1.8
Homoharringtonine	26833-87-4	[C@@]123[C@@H]([C@@H](C(=C1)OC)OC(=O)[C@](CC(=O)OC)(O)CCCC(O)(C)C)c1c(cc4c(c1)OCO4)CCN2CCC3	1.8	2.96		10.2	9.8	Clinical pharmacology of homoharringtonine Savaraj N; Lu K; Dimery I; Feun L G; Burgess M; Keating M; Loo T L Cancer treatment reports (1986), 70(12), 1403-7.	Omacetaxine mepesuccinate Reported averages in table 1 for HHT. Dosed by 6-hour infusion at 3-4 mg/m2, N=8. MRT from Cl and VDss.		1970	545.62	10	2	124	10	cationic	0.95	0.17
Hydralazine	86-54-4	N\N=C\1/NN=Cc2ccccc12	1.5	85	0.12	0.29	1	Ludden TM, Shepherd AMM, McNay JL, and Lin MS (1983) Effect of intravenous dose on hydralazine kinetics after administration. Clin. Pharmacol. Ther. 34: 148-152. Kirsten R, Nelson K, Kirsten D, and Heintz B (1998) Clinical pharmacokinetics of vasodilators. Part I. Clin. Pharmacokinet. 34: 457-482.	From Ludden, et al., used 1.02 umol/kg dose group. Blood values corrected to plasma using B/P=1.68.		1949	160.18	4	2	62.8	0	cationic	2.4	-1.1
Hydrocortisone	50-23-7	C[C@]12CCC(=O)C=C1CC[C@H]3[C@@H]4CC[C@](O)(C(=O)CO)[C@@]4(C)C[C@H](O)[C@H]23	0.38	5.7	0.2	1.9	1.6	Derendorf H, Moellmann H, Barth J, Mollman C, Tunn S, and Krieg M (1991) Pharmacokinetics and oral bioavailability of hydrocortisone. J. Clin. Pharmacol. 31: 473-476. Toothaker RD and Welling PG (1982) Effect of dose size on the pharmacokinetics of intravenous hydrocortisone during endogenous hydrocortisone suppression. J. Pharmacokinet. Biopharm. 10: 147-156. Mager DE and Jusko WJ (2002) Quantit…			1946	362.46	5	3	94.8	2	neutral	1.5	1.5
Hydroflumethiazide	135-09-1	NS(=O)(=O)c1cc2c(NCNS2(=O)=O)cc1C(F)(F)F	2.2	9.7		3.8	5.2	Broers O and Jacobsen S (1979) Distribution and elimination of hydroflumethiazide in man. Eur. J. Clin. Pharmacol. 16: 125-131.	VDss calculated from reported micro constants. CL calculated from Vdbeta and t1/2		1959	331.29	7	3	118.4	1	neutral	0.047	0.032
Hydromorphone	466-99-9	CN1CC[C@@]23[C@H]4CCC(=O)[C@@H]2Oc5c(O)ccc(C[C@@H]14)c35	4.3	28	0.86	2.6	2.3	Dilaudid-HP Product Label			1945	285.34	4	1	49.8	0	cationic	1.5	0.47
Hydroxycamptothecin, 10-	19685-09-7	CC[C@@]1(c2cc-3n(c(=O)c2COC1=O)Cc4c3nc5ccc(cc5c4)O)O	0.22	2.23		1.63	1.67	LI Su, ZHANG Li, GUANG Zhong-zhen, ZHAN Jing, LI Yu-yan , JIANG Wen-qi. Absolute bioavailability of hydroxycamptothecin tablets in cancer patients. Chin. J. Clin. Pharmacol. 2005, 22, 46-49.(written in Chinese)	N=8, 12 mg.m-2 dose, conversion factor 1.73m2/70kg, 30 minutes infusion. Data digitized and PK parameters calculated via PKSolver. AUC reported as 2171 ug.h.L-1 (not specified); AUS (inf) calculated as 2211 ng.h.mL-1. 2% difference.		1969	364.35	7	2	101.6	1	neutral	1.4	1.4
Hydroxychloroquine	118-42-3	CCN(CCO)CCCC(C)Nc1ccnc2cc(Cl)ccc12	700	11	0.57	1300	850	Tett SE, Cutler DJ, Day RO, and Brown KF (1988) A dose-ranging study of the pharmacokinetics of hydroxychloroquine following intravenous administration to healthy volunteers. Br, J. Clin. Pharmacol. 26: 303-313. Brocks DR, Skeith KJ, Johnston C, Emamibafrani J, Davis P, Russell AS, and Jamali F (1994) Hematologic disposition of hydroxychloroquine enantiomers. J. Clin. Pharmacol. 34: 1088-1097.			1891	335.87	4	2	48.4	9	cationic	4.1	1.5
Hydroxycotinine, 3'-	34834-67-8	CN1[C@@H](C[C@@H](O)C1=O)c2cccnc2	0.85	1.8		7.9	5.9	Scherer G, Jarczyk L, Heller WD, Biber A, Neurath GB, and Adlkofer F (1988) Pharmacokinetics of nicotine, cotinine, and 3'-hydroxycotinine in cigarette smokers. Klin. Wochenschr. 66(Supp 11): 5-11.	VDss calculated from C vs t data obtained by digitization of the plot provided in the reference.		1960	192.21	4	1	53.4	1	anionic	-1.5	-2
Hydroxydihydroquinidine, 3(S)-	85405-59-0	CC[C@@]1(O)CN2CC[C@H]1C[C@@H]2[C@@H](O)c3ccnc4ccc(OC)cc34	6.8	12	0.47	9.4	6.7	Jaillon P, Poirier JM, Lecocq B, Jarreau C, Pays M, Richard MO, and Cheymol G (1986) Pharmacokinetics of hydroxy-3(S)-dihydroquinidine in healthy volunteers after intravenous and oral administration. Eur. J. Drug Metab. Pharmacokinet. 11: 233-238. Leroyer R, Varoquaux O, Guillebastres R, Jarreau C, Normand JP, Jaillon P, Advenier C, and Pays M (1986) Study on protein binding of 3-(R)- and 3-(S)-h…			1982	342.43	5	2	65.8	4	cationic	2.2	1.4
Hydroxyimipramine, 2-	303-70-8	CN(C)CCCN1c2ccccc2CCc3cc(O)ccc13	6.6	9.2	0.36	12	10	Ciraulo DA, Barnhill JG, Jaffe JH, Ciraulo AM, and Tarmey MF (1990) Intravenous pharmacokinetics of 2-hydroxyimipramine in alcoholics and normal controls. J. Studies Alcohol 51: 366-372.	VDss calclated from C vs t data obtained by digitization of the plot included in the reference.		1959	296.41	3	1	26.7	4	cationic	3.9	2.2
Hydroxymidazolam	59468-90-5	c1cc2n3c(cnc3CO)CN=C(c3ccccc3F)c2cc1Cl	0.77	9.71	0.1	1.3	1.1	Mandema, Jaap W.; Tuk, Bert; Van Steveninck, Alfred L.; Breimer, Douwe, D.; Cohen, Adam F.; Danhof, Meindert. Pharmacokinetic-pharmacodynamic modeling of the central nervous system effects of midazolam and its main metabolite  -hydroxymidazolam in healthy volunteers. Clinical Pharmacology & Therapeutics (St. Louis, MO, United States) (1992), 51(6), 715-28.	1-hydroxymidazolam, a-hydroxymidazolam. 70 kg assumed using data reported in table 1 (average obtained from dose in mg and mg/kg was 69.2). MRT from VDss and clearance. N=8 at doses around 0.1 mg/kg.		1976	341.77	4	1	50.4	2	neutral	1.9	1.9
hydroxypropyl cyclodextrin,β-	128446-35-5	O1[C@H]2O[C@@H]([C@@H](O[C@H]3O[C@@H]([C@@H](O[C@H]4O[C@@H]([C@H]([C@H](O)[C@H]4O)O[C@H]4O[C@@H]([C@H]([C@H](O)[C@H]4O)O[C@H]4O[C@@H]([C@@H](O[C@H]5O[C@@H]([C@@H](O[C@H]6O[C@@H]([C@@H]1[C@H](O)[C@H]6O)CO)[C@H](O)[C@H]5O)CO)[C@H](O)[C@H]4O)CO)CO)CO)[C@H](O)[C@H]3O)CO)[C@H](O)[C@H]2O)CO.[*]CCO	0.21	1.8		1.9	1.6	Szathmary, S.C.; Seiler, K.U.; Luhmann, I.; Huss, H.J. Pharmacokinetic behavior and absolute bioavailability of hydroxypropyl-beta-cyclodextrin after increasing doses in volunteers. Cyclodextrins : 5th International symposium : Papers, 1990, 535-540.	N=8/leg. Assumes 70 kg BW. Averaged data from 6 dose levels (0.5 to 3 gm)		1987	1180.04	36	22	574.3	8	n/a	n/a	n/a
Hydroxysafflor yellow A	78281-02-4	C1(C(=C([C@@](C(=C1C(\C=C\c1ccc(cc1)O)=O)O)(O)[C@H]1[C@H](O)[C@@H](O)[C@H](O)[C@H](O1)CO)O)[C@H]1[C@H](O)[C@@H](O)[C@H](O)[C@H](O1)CO)=O	0.2	1	0.22	3.6	2.9	Pharmacokinetic properties of hydroxysafflor yellow A in healthy Chinese female volunteers. Yang, Zhifu; Yang, Jing; Jia, Yanyan; Tian, Yun; Wen, Aidong Journal of Ethnopharmacology (2009), 124, (3), 635-638. ppb: Wang, Jianming; Zou, Tian; Zhang, Yuanyuan; Fan, Ning. Study on plasma protein-​binding rate of hydroxysafflor yellow A in safflor yellow powder injection. Zhongchengyao (2011), 33(6), …	HSYA, Safflomin A. Data digitized from figure 1. 1 hr infusion, all female chinese subjects, average weight 57.1 kg. 35, 70 and 140 mg doses. N=12 per dose group.		1981	612.53	16	12	295.4	7	neutral	-0.48	-0.51
Hydroxystaurosporine, 7-	112953-11-4	CN[C@@H]1C[C@H]2OC(C)([C@@H]1OC)n3c4ccccc4c5c6[C@@H](O)NC(=O)c6c7c8ccccc8n2c7c35	0.15	0.0037	0.0022	680	790	Fuse E, Tanii H, Kurata N, Kobayashi H, Shimada Y, Tamura T, Sasaki Y, Tanigawara Y, Lush RD, Headlee D, Figg WD, Arbuck SG, Senderowicz AM, Sausville EA, Akinaga S, Kuwabara T, and Kobayashi S (1998) Unpredicted clinical pharmacology of UCN-01 caused by specific binding to human alpha1-acid glycoprotein. Canc. Res. 58: 3248-3253. Dees EC, Baker SD, O'Reilly S, Rudek MA, Davidson SB, Aylesworth C…	UCN-01. Used data from 95 mg/m2 group.		1987	482.53	8	3	89.7	2	cationic	2.5	-0.29
Hydroxyurea	127-07-1	NC(=O)NO	0.52	1.5	1	4.8	3.4	Rodriguez GI, Kuhn JG, Weiss GR, Hilsenbeck SG, Eckardt JR, Thurman A, Rinaldi DA, Hodges S, Von Hoff DD, Rowinsky EK (1998) A bioavailability and pharmacokinetic study of oral and intravenous hydroxyurea. Blood 91:1533-1541			1908	76.05	4	3	75.3	0	neutral	-1.5	-1.5
Hypericin	548-04-9	Cc1cc(O)c2C(=O)c3c(O)cc(O)c4c5c(O)cc(O)c6C(=O)c7c(O)cc(C)c8c1c2c(c34)c(c78)c56	0.25	0.13		32	42	Kerb R, Brockmuller J, Staffeldt B, Ploch M, and Roots I (1996) Single dose and steady-state pharmacokinetics of hypericin and pseudohypericin. Antimic. Agents Chemother. 40: 2087-2093.	Data from two subjects with very high variability.		1912	504.44	8	6	155.5	0	anionic	5.2	1.8
Ibandronic Acid (Ibandronate)	114084-78-5	CCCCCN(C)CCC(O)(P(=O)(O)O)P(=O)(O)O	0.55	1.8	0.15	5.1	14	Barrett J, Worth E, Bauss F, and Epstein S (2004) Ibandronate: a clinical pharmacological and pharmacokinetic update. J. Clin. Pharmacol. 44: 951-965	Pharmacokinetic parameters were calculated from C vs t data obtained by digitization of the plot provided in the reference.		1981	319.23	8	5	138.5	9	anionic	-0.58	-5.9
Ibrutinib	936563-96-1	C=CC(=O)N1CCCC(C1)[n@]2c3c(c(n2)c4ccc(cc4)Oc5ccccc5)c(ncn3)N	9.75	16.4	0.03	9.9	5	FDA site label information: accessed March 16 2015.http://www.accessdata.fda.gov/drugsatfda_docs/label/2015/205552s002lbl.pdf.	70 kg assumed. Data reported in L (VDss) or L/h (clearance). MRT form VDss and clearance. Clearance 62 (fasted) to 76 (fed) L/h. Midpoint taken. T1/2 4 to 6 hours. 5 taken as midpoint.		2007	440.5	8	1	99.2	5	neutral	4	4
Ibuprofen	15687-27-1	CC(C)Cc1ccc(cc1)C(C)C(=O)O	0.15	0.82	0.006	3	1.6	Martin W, Koselowske G, Toberich H, Kerkmann T, Mangold B, and Augustin J (1990) Pharmacokinetics and absolute bioavailability of ibuprofen after oral administration of ibuprofen lysine in man. Biopharm. Drug Dispos. 11: 265-278. Lee KJ, Mower R, Hollenbeck T, Castelo J, Johnson N, Gordon P, Sinko PJ, Holme K, and Lee YH (2003) Modulation of nonspecific binding in ultrafiltration protein binding …			1961	206.28	2	1	37.3	4	anionic	3.2	0.34
Ibutilide	122647-31-8	CCCCCCCN(CC)CCCC(O)c1ccc(NS(=O)(=O)C)cc1	12	26	0.6	7.7	7	Jungbluth GL, Della-Coletta ASA, and VanderLugt JT (1991) Evaluation of the pharmacokinetics and pharmacodynamics of ibutilide fumarate and its enantiomers in healthy male volunteers. Pharm. Res. 8: S-249. Howard PA (1999) Ibutilide: an antiarrythmic agent for the treatment of atrial fibrillation or flutter. Ann Pharmacother. 33: 38-47.			1985	384.58	5	2	69.6	14	cationic	4.4	2.4
Idarubicin	58957-92-9	C[C@@H]1O[C@H](C[C@H](N)[C@@H]1O)O[C@H]2C[C@@](O)(Cc3c(O)c4C(=O)c5ccccc5C(=O)c4c(O)c23)C(=O)C	38	24	0.076	26	16	Robert J (1993) Clinical pharmacokinetics of idarubicin. Clin. Pharmacokinet. 24: 275-288. Kessel M, Gieseler F, and Woodcock BG (1999) Influence of serum protein on the uptake and retention of idarubicin by sensitive and multidrug resistant human leukemic cells. Eur. J. Clin. Pharmacol. 55: 369-373.	Compendium of intravenous data with median values.		1976	497.49	10	5	176.6	3	cationic	1.3	-1.5
Idazoxan	79944-58-4	C1CN=C(N1)C2COc3ccccc3O2	3.3	10		5.5	4.2	Muir NC, Lloyd-Jones JG, Nichols JD, and Clifford JM (1986) The pharmacokinetics after intravenous and oral administration in man of the alpha2-adrenoreceptor antagonist idazoxan (RX781094). Eur. J. Clin. Pharmacol. 29: 743-745.	VDss calculated from digitized plots.		1981	204.23	4	1	42.8	1	cationic	0.27	-2.5
Idrapril	127420-24-0	C1CC[C@@H]([C@@H](C1)C(=O)N(C)CC(=O)NO)C(O)=O	1	6.3	1	2.8	2.6	Zanchi, A.; Nussberger, J.; Criscuoli, M.; Capone, P.; Brunner, H. R. Angiotensin-​converting enzyme inhibition by hydroxamic zinc-​binding idrapril in humans. Journal of Cardiovascular Pharmacology (1994), 24(2), 317-322//ppb: Criscuoli, Marco; Lippi, Annalisa; Mengozzi, Grazia; Sardelli, Giuliana; Subissi, Alessandro; Giachetti, Antonio. Pharmacokinetics and pharmacodynamics of idrapril in rats…	N=8 , average BW = 74kg. 1, 5 and 25mg iv doses in sequence with 1 week of was-out interval. Repoorted PK of 1mg dose. PK from 1mg profile in Fig. 5. Reported data in Table 3: CL = 446 mL/min (6.0 mL/min/kg) and term. T1/2 = 3h	The 5mg iv profile should be dose-proportional to 1mg based on the dose and AUC, but the reported CL in Table 3 is higher for 5mg. Not dose-proportionality for 25mg iv dose.	1989	258.27	7	3	106.9	4	anionic	-1	-3.5
Idrocilamide	6961-46-2	c1(\C=C\C(NCCO)=O)ccccc1	0.11	0.99		1.93	1.35	H. Maier-Lenz, L. Ringelski, A. Windhorfer zur.Pharmakokinetik nnd Bioverfiigba1·keit des Myotonolytikums N-(Hydroxy-2-athyl)-cinnarnid. Arzneim.-Forsch. 1980, 30, 1813-1816.	LCB-29. Brolitene. N=10, 60 mg iv dose, 68 kg average weight Reported AUC = 11.31 +/- 4.9 ug.hr/mL AUC computed as 14.8 ug.h/mL from plot digitization but within sd and thus accepted. lambda z = 0.7 hr-1 VD reported = 7.4 L		1948	191.23	3	2	49.3	4	neutral	0.86	0.86
IDX899	1097733-15-7	c12c(ccc(c1)Cl)[nH]c(c2P(=O)(c1cc(cc(c1)/C=C/C#N)C)OC)C(=O)N	0.56	1.71		5.5	4.4	Microdose Pharmacokinetics of IDX899 and IDX989, Candidate HIV-1 Non-NucleosideReverse Transcriptase Inhibitors, Following Oral and Intravenous Administration in Healthy Male Subjects. Xiao-Jian Zhou, R. Colin Garner, DSc, Sheila Nicholson, C. James Kissling,and Douglas Mayers. J Clin Pharmacol 2009, 49 (12) 1408-1416.	GSK2248761. No structure available in SciFinder as of January 14 2012. Available in cited paper. Data digitized from figure 2. 3% difference in AUCinf with reported value. Microdose of 100 ug but PK confirmed for oral legs at pharmacologically relevant doses of 200 and 1200 mg. Iv infusion of 30' N=8, 76.6 kg average weight.	Also reported as GSK 2248761 in SciFinder	2009	413.79	6	2	109	6	neutral	2.9	2.9
IDX989	1254181-18-4	c12c(ccc(c1F)Cl)[nH]c(c2P(=O)(c1cc(cc(c1)/C=C/C#N)C)OC)C(=O)N	0.97	1.83		8.9	7.4	Microdose Pharmacokinetics of IDX899 and IDX989, Candidate HIV-1 Non-NucleosideReverse Transcriptase Inhibitors, Following Oral and Intravenous Administration in Healthy Male Subjects. Xiao-Jian Zhou, R. Colin Garner, DSc, Sheila Nicholson, C. James Kissling,and Douglas Mayers. J Clin Pharmacol 2009, 49 (12) 1408-1416.	No structure available in SciFinder as of January 14 2012. Available in cited paper. Data digitized from figure 2. 6% difference in AUCinf with reported value (11.2 ug.h/mL reported, 11.9 ug.h/mL calculated). Microdose of 100 ug but PK NOT confirmed for oral legs at pharmacologically relevant doses of 200 and 1200 mg as in the case of IDX899. Iv infusion of 30' N=8, 76.6 kg average weight.		2009	431.78	6	2	109	6	neutral	2.9	2.9
Ifenprodil	23210-56-2	CC(C(c1ccc(cc1)O)O)N2CCC(CC2)Cc3ccccc3	18.99	64.57		4.9	4.32	Jing Yang,ChengtaoLu,WeiSong,JiankangLi,YiDing,YanrongZhu,JinyiCao, Likun Ding, YanyanJia, AidongWenn. Determination of ifenprodil by LC–MS/MS and its application to a pharmacokinetic study in healthy Chinese volunteers. Acta Pharm. Sin.B, 2013, 3, 180-184.	Data digitized from plot reported. N=10, 62 kg median weight assumed, 15 mg dose, 0.5 hr infusion. Highly linear data. Other doses administered: 5 and 10 mg. AUCinf reported as 63.1 ng.h.mL-1. Calculated AUCinf value 62.44 ng.h.mL-1. 1% difference.		1968	325.44	3	2	43.7	5	cationic	3.6	1.8
Ifetroban	143443-90-7	CCCCCNC(=O)c1coc(n1)[C@H]2[C@@H](Cc3ccccc3CCC(=O)O)[C@@H]4CC[C@H]2O4	4.4	6.4		11	22	Dockens RC, Santone KS, Mitroka JG, Morrison RA, Jemal M, Greene DS, and Barbhaiya RH (2000) Disposition of radiolabeled ifetroban in rats, dogs, monkeys, and humans. Drug Metab. Dispos. 28: 973-980.			1992	440.53	7	2	102	11	anionic	4	1.2
Ifosfamide	3778-73-2	ClCCNP1(=O)OCCCN1CCCl	0.62	1.1	1	9.4	6.6	Corlett SA, Parker D, and Chrystyn H (1995) Pharmacokinetics of ifosfamide and its enantiomers following a single 1 h intravenous infusion of the racemate in patients with small cell lung carcinoma. Br. J. Clin. Pharmacol. 39: 452-455.			1953	261.09	4	1	41.6	5	neutral	0.88	0.88
Ilaprazole	172152-36-2	Cc1c(ccnc1CS(=O)c2[nH]c3ccc(cc3n2)n4cccc4)OC	0.19	0.73		4.32	3.59	Hongyun Wang, Ning Ou, Liwei Lang, Ruihua Shi, Pei Hu and Ji Jiang. Pharmacokinetics and pharmacodynamics of intravenous ilaprazole in healthy subjects after single ascending doses. Xenobiotica, ahead of press, 2016. Downloaded March 27, 2016.	Data digitized from plot reported. N=15, 62.6 kg average weight reported, 20 mg dose, 45' infusion. AUCinf reported 7057 ng.hr.mL-1; calculated 7334 ng.hr.mL-1. Highly linear also at doses of 5 and 10 mg, but only highest digitized as showing the most interpretable plot.		1995	366.44	6	1	72.8	5	anionic	2.7	1.9
Iloprost	78919-13-8	CC#CCC(C)[C@H](O)\C=C\[C@H]1[C@H](O)C[C@@H]2C\C(=C/CCCC(=O)O)\C[C@H]12	0.37	16	0.4	0.39	0.57	Krause W and Krais T (1986) Pharmacokinetics and pharmacodynamics of the prostacyclin analogue iloproset in man. Eur. J. Clin. Pharmacol. 30: 61-68. Hildebrand M (1997) Pharmacokinetics and tolerablity of oral iloprost in thromboangitis obliterans patients. Eur. J. Clin. Pharmacol. 53: 51-56. Ventavis Product Label.	VDss calculated from digitized plots. VDss and CL data are the average of the two reports; t1/2 data are only from Hildebrandt.		1981	360.49	4	3	77.8	9	anionic	3.5	0.96
Imatinib	152459-95-5	CN1CCN(Cc2ccc(cc2)C(=O)Nc3ccc(C)c(Nc4nccc(n4)c5cccnc5)c3)CC1	3.9	3.3	0.05	20	22	Peng B, Dutreix C, Mehring G, Hayes MJ, Ben-Am M, Sieberling M, Pokorny R, Capdeville R, and Lloyd P (2004) Absolute bioavailability of imatinib (Glivec) orally versus intravenous infusion. J. Clin. Pharmacol. 44: 158-162. Gleevec Product Label.	VDss calculated from C vs t data obtained by digitization of the plot provided in the reference.		1993	493.6	8	2	86.3	7	cationic	4.4	3.3
Imidafenacin	170105-16-5	[H]N([H])C(C(CCn1ccnc1C)(c1ccccc1)c1ccccc1)=O	1.51	6.1	0.12	4.1	3.2	Ohno T, Nakade S, Nakayama K, et al. Absolute bioavailability of imidafenacin after oral administration to healthy subjects. Br J Clin Pharmacol 2008, 65, 197-202.//ppb: http://www.kyorin-pharm.co.jp/prodinfo/medicine/pdf/URITOS_Tablets01mg.pdf. Accessed June 30 2017.	N=14, 0.1 mg/kg, 15' inf. healthy volunteers, 80.6 average weight, 122 L VDss, Cltot 29.5 L/h.		1995	319.4	4	1	60.9	6	neutral	1.8	1.7
Imipenem	64221-86-9	C[C@@H](O)[C@@H]1[C@H]2CC(=C(N2C1=O)C(=O)O)SCCNC=N	0.24	3	0.86	1.3	0.95	Saito A (1991) Pharmacokinetics of panipenem/betamipron. Chemotherapy 39(Suppl. 3): 227-235. Bergan T (1984) Pharmacokinetics of beta-lactam antibiotics. Scand. J. Infect. Dis. 42(Suppl): 83-98.	VDss calculated from C vs t data provided in the reference.		1977	299.35	7	4	113.7	7	zwitterionic	-0.81	-3.1
Imipramine	50-49-7	CN(C)CCCN1c2ccccc2CCc3ccccc13	12	13	0.075	15	16	Brosen K and Gram LF (1988) First-pass metabolism of imipramine and desipramine: impact of the sparteine oxidation phenotype. Clin. Pharmacol. Ther. 43: 400-406. Nyberg G and Maartensson E (1984) Determination of free fractions of tricyclic antidepressants. Naunyn-Sch. Arch. Pharmacol. 327: 260-265. Danon A and Chen Z (1979) Binding of imipramine to plasma proteins: effect of hyperlipoproteinemia…	VDss was calculated using C vs t data obtained from plots provided in the reference.		1959	280.41	2	0	6.5	4	cationic	4.3	2.7
Imipramine N-oxide	6829-98-7	CN(=O)(C)CCCN1c2ccccc2CCc3ccccc13	1.9	12		2.6	1.8	Nagy A and Hansen T (1978) The kinetics of imipramine N-oxide in man. Acta Pharmacol. Toxicol. 42: 58-67.	VDss obtained from C vs t data obtained by digitization of the plot provided in the reference.		1962	296.41	3	0	20.3	4	neutral	0.84	0.84
Incadronate (acid)	124351-85-5	C1CCCC(CC1)NC(P(=O)(O)O)P(=O)(O)O	0.24	2.16	0.9	1.85	1.82	T. Usui, Y. Oiso, A. TOMITA , E. OGATA, T. UCHIDA, K. IKEDA , T. WATANABE I, S. HIGUCHI. Pharmacokinetics of incadronate, a new bisphosphonate, in healthy volunteers and patients with malignancy-associated hypercalcemia. Int. J. Clin. Pharmacol. Ther. 1997, 35, 239-244.	Average of 4 subjects per dose across 4 doses. 0.2, 0.4, 0.8 and 1.6 mg. 70 kg median weight taken from range. Renal clearance ~ 63% across latter three dose. MRT from VDss and clearance.		1989	287.19	7	5	127.1	4	anionic	-0.55	-5.8
Indacaterol	312753-06-3	[C@@H](O)(c1ccc(c2c1ccc(=O)[nH]2)O)CNC1Cc2c(C1)cc(c(c2)CC)CC	19.4	4.48	0.05	72.4	92.5	Pharmapendium. Indacaterol Maleate - FDA Approval Package Clinical Pharmacology and Biopharmaceutics Review 022383/S-000 Part 02. Data from Table 1 on page 4 of 47.	200 ug iv dose. 70 kg assumed. MRT from VDss and Cl. Plasma protein binding from PDR. Accessed February 22 2013.		2000	392.49	5	4	85.3	6	cationic	2.6	0.27
Indinavir	150378-17-9	CC(C)(C)NC(=O)[C@@H]1CN(Cc2cccnc2)CCN1C[C@@H](O)C[C@@H](Cc3ccccc3)C(=O)N[C@@H]4[C@H](O)Cc5ccccc45	0.82	18	0.36	0.76	1	Yeh KC, Stone JA, Carides AD, Rolan P, Woolf E, and Ju WD (1999) Simultaneous investigation of indinavir nonlinear pharmacokinetics and bioavailability in healthy volunteers using stable isotope labeling technique: study design and model-independent data analysis. J. Pharm. Sci. 88: 568-573. Boffito M, Hoggard PG, Reynolds HE, Bonora S, Meaden ER, Sinicco A, Di Perri G, and Back DJ (2002) The unb…	VDss and t1/2 were calculated from data obtained by digitization of C vs t plots (group C) provided in the report. Established from PDR that most of radiocativity found in feces was not parent. Thus the compound was absorbed and metabolized before being excreted in feces and urine.		1957	613.79	9	4	118	11	neutral	3	2.9
Indisulam	165668-41-7	c1(ccc(cc1)S(=O)(=O)N)S(=O)(=O)Nc1cccc2c(c[nH]c12)Cl	0.68	0.72	0.001	16.9	20.3	E. Raymond, W.W. ten Bokkel Huinink, J. Taı¨eb, J.H. Beijnen, S. Faivre, J. Wanders, M. Ravic, P. Fumoleau, J.P. Armand, and J.H.M. Schellens. Phase I and Pharmacokinetic Study of E7070, a Novel Chloroindolyl Sulfonamide Cell-Cycle Inhibitor, Administered as a One-Hour Infusion Every Three Weeks in Patients With Advanced Cancer. J. Clin. Onc., 2002, Vol 20, 3508-3521. ppb: SATURABLE BINDING TAKEN…	E7070. Weighted average of 6 patients across 100 and 200 mg/m2 (linear). Generally non-linear pharmacokinetics and high percentage of extrapolated AUC. 70-kg average weight assumed.		1995	385.85	7	3	122.1	4	neutral	1.3	1
Indocyanine Green	3599-32-4	CC1(C)\C(=C\C=C\C=C\C=C/C2=[N+](CCCCS(=O)(=O)[O-])c3ccc4ccccc4c3C2(C)C)\N(CCCCS(=O)(=O)O)c5ccc6ccccc6c15	0.035	6.8	0.05	0.086	0.065	Vanakoski J, Idanpaan-Heikkila JJ, and Seppala T (1996) Exposure to high environmental temperature in the sauna does not change plasma indocyanine green (ICG) clearance in healthy subjects. Pharmacol. Toxicol. 78: 94-98. IC-Green Product Label.		Reported CAS number of Na salt. Structure without Na. CAS number of component: 28782-33-4	1958	752.98	8	1	117.8	14	anionic	5.4	3.1
Indomethacin	53-86-1	COc1ccc2c(c1)c(CC(=O)O)c(C)n2C(=O)c3ccc(Cl)cc3	0.096	1.3	0.01	1.2	1.4	Yeh KC, Berger ET, Breault GO, and Lei BE (1982) Effect of sustained release on the pharmacokinetic profile of indomethacin in man. Biopharm. Drug Dispos. 3: 219-230. Indocin Product Label.	CL and half-life were calculated from C vs t data included in the reference. VDss was calculated using micro rate constants provided.		1955	357.79	5	1	68.5	5	anionic	3.4	0.59
Indoprofen	31842-01-0	N1(c2ccc(cc2)C(C(=O)O)C)C(=O)c2c(C1)cccc2	0.12	0.65	0.01	2.7	2.11	Tamassia, V.; Corvi, G.; Moro, E.; Tosolini, G. P.; Fuccella, L. M. Pharmacokinetics and bioavailability of indoprofen in man. Eur. J. Clin. Pharmacol. (1976), 10(3-4), 257-62	K4277. Data digitized from plot reported at 100 mg dose. N=4. Average weight 68.1 kg. AUC calculated 32.67 ug.h.mL-1; AUC reported 32.43 ug.h.mL-1.		1972	281.31	4	1	57.6	3	anionic	2.4	-0.59
Indoramin	26844-12-2	O=C(NC1CCN(CCc2c[nH]c3ccccc23)CC1)c4ccccc4	4.9	20	0.15	4.1	4.3	Norbury HM, Franklin RA, Marrott PK, and Warrington SJ (1983) Pharmacokinetics of intravenous indoramin in middle aged male and female volunteers. Eur. J. Clin. Pharmacol. 25: 243-246.	Cited fu value at lowest concentration which was relevant to the plasma concentrations. VDss calclated from digitized plot.		1969	347.45	4	2	48.1	5	cationic	3.8	3.3
INO-1001	3544-24-9	C(=O)(N)c1cc(N)ccc1	1.9	7.9		4	5	A Phase IB Trial of Intravenous INO-1001 Plus Oral Temozolomide in Subjects with Unresectable Stage-III or IV Melanoma. Agop Y. Bedikian, Nicholas E. Papadopoulos, Kevin B. Kim, Wen-Jen Hwu, Jade Homsi, Michelle R. Glass, Suzanne Cain, Patrick Rudewicz, Laurent Vernillet, and Patrick Hwu. Cancer Investigation, 2009, 27,756–763.	NSC36962. Weighted average of 100, 200 and 400 mg doses, 1-hr infusion,		1917	136.15	3	2	69.1	1	neutral	-0.11	-0.11
Inogatran	155415-08-0	C1[C@@H](C(=O)NCCCNC(N)=N)N(CCC1)C(=O)[C@H](NCC(=O)O)CC1CCCCC1	0.26	6.1	0.76	0.71	1	Ann-Catrine Teger-Nilsson, Ulf Eriksson, DaVid Gustafsson, Ruth Bylund, Gunnar Fager, Peter Held. Phase I Studies on Inogatran, a New Selective Thrombin Inhibitor. JCC Feb 1995 abstract 931-115 p. 117A, : doi:10.1016/0735-1097(95)91943-R Accessed May 8 2013. ppb: Ulf G. Eriksson, Lars Renberg, Ulf Bredberg, Ann-Catrine Teger-Nilsson and Carl Gunnar Regardh. Animal Pharmacokinetics of Inogatran, a…	total dose 25 umol iv bolus (N=16). Vdss reported as 0.26 mL/kg. MRT calculated from VDss and CL. ppb data ranging from 20 to 28% bound across species. Median taken.		1993	438.56	10	6	160.6	12	cationic	-0.46	-3.4
Intoplicine	125974-72-3	CN(C)CCCNc1ncc(C)c2[nH]c3ccc4cc(O)ccc4c3c12	11	18		11	19	Abigerges D, Armand JP, Chabot GG, Bruno R, Bissery MC, Bayssas M, Klink-Alakl M, Clavel M, and Catimel G (1996) Phase I and pharmacology study of intoplicine (RP 60475; NSC 645008), a novel topoisomerase I and II inhibitor, in cancer patients. Anti-Cancer Drugs 7: 166-174			1990	348.44	5	3	64.2	5	cationic	3.8	-1.2
Iodixanol	92339-11-2	c1(N(CC(CN(c2c(c(c(I)c(c2I)C(NC[C@@H](CO)O)=O)C(NC[C@@H](CO)O)=O)I)C(C)=O)O)C(C)=O)c(c(c(I)c(c1I)C(NC[C@@H](CO)O)=O)C(NC[C@@H](CO)O)=O)I	0.2	1.44	1	2.3	2.1	Human pharmacokinetics of iodixanol Svaland, M. G.; Haider, T.; Langseth-Manrique, K.; Andrew, E.; Hals, P. A. Investigative Radiology (1992), 27(2), 130-3. ppb: Jacobsen P B; Blindheim L; Skotland T. Bioanalytical methods for iodixanol and their application to studies on metabolism and protein binding. Acta radiologica. Supplementum. 1995, 399, 61-66.	Digitized from 0.3 g I/kg dose (=0.61 g I/kg), dose linearity observed, N=10 78 kg average weight. Reported Cl (total) at that dose 115 mL/min = 1.47 mL/min/kg. (94% renally excreted unchanged)		1984	1550.18	21	13	339.1	22	neutral	-3.9	-3.9
Iododoxorubicin	83997-75-5	[H]N([H])[C@H]1C[C@H](O[C@H]2C[C@@](Cc3c2c(c2C(c4c(cccc4OC)C(c2c3O[H])=O)=O)O[H])(C(CO[H])=O)O[H])O[C@@H](C)[C@H]1I	53.6	140		6.4	10.3	Robert J; Armand J P; Huet S; Klink-Alakl M; Recondo G; Hurteloup P. Pharmacokinetics and metabolism of 4'-​iodo-​4'-​deoxy-​doxorubicin in humans. J. Clin. Oncol. 1992,10(7), 1183-1190.	N=16, across several dose. Average of VDss 2,171 +/- 1,551 L/m2. Clearance 340+/- 133 L/hr/m2. Conversion factor 1.73 m2/70 kg.		1982	653.42	11	5	185.8	10	cationic	1.9	-0.74
Iohexol	66108-95-0	CC(=O)N(CC(O)CO)c1c(I)c(C(=O)NCC(O)CO)c(I)c(C(=O)NCC(O)CO)c1I	0.16	2	1	1.3	1.5	Back SE, Krutzen E, and Nilsson-Ehle P. Contrast media as markers for glomerular filtration: a pharmacokinetic comparison of four agents. Scand. J. Clin. Lab Invest. 1988, 48, 247-253.	VDss calculated from C vs t data obtained by digitization of the plot provided in the reference.		1955	821.14	12	8	199.9	12	neutral	-2.8	-2.8
Iomeprol	78649-41-9	[H]N(C[C@@H](CO[H])O[H])C(c1c(c(C(N([H])C[C@@H](CO[H])O[H])=O)c(c(c1I)N(C)C(CO[H])=O)I)I)=O	0.23	1.4	1	2.7	2.3	Lorusso et al. Pharmacokinetics and safety of iomeprol in healthy volunteers and in patients with renal imperiment or end-stage renal disease requiring hemodyalisis. Invest. Radiol. 2001, 36, 309-316. ppb: Rosati G. Clinical pharmacology of iomeprol. European journal of 1994, 18 Suppl 1 S51-60	Only data in healthy volunteers taken. N=6. 50 ml of 400 mg I/mL solution of iomeprol.		1981	777.09	11	7	179.7	15	neutral	-2.1	-2.1
Iopamidol	60166-93-0	C[C@H](O)C(=O)Nc1c(I)c(C(=O)NC(CO)CO)c(I)c(C(=O)NC(CO)CO)c1I	0.28	1.9	1	2.5	2.1	McKinstry DN, Rommel AJ, and Sugerman AA (1984) Pharmacokinetics, metabolism, and excretion of iopamidol in healthy subjects. Invest. Radiol. 19: s171-s174.			1976	777.09	11	8	188.4	10	neutral	-2.3	-2.3
Iopentol	89797-00-2	c1(c(c(c(I)c(c1I)C(NC[C@@H](CO)O)=O)C(NC[C@@H](CO)O)=O)I)N(C[C@@H](COC)O)C(C)=O	0.2	1.27	1	2.64	2.04	Waaler A; Jorgensen N P; Koksvik B; Skinnemoen K; Andrew E. Pharmacokinetics of iopentol in healthy volunteers. Acta radiol. Suppl. 1987, 370, 113-117.//ppb: Thomas Lehnert, Erich Keller, Klaus Gondolf, Tanja Schäffner, Hermann Pavenstädt and Peter Schollmeyer. Effect of haemodialysis after contrast medium administration in patients with renal insufficiency. Nephrol Dial Transplant, 1998, 13,358–…	Dose expressed in gI/kg. 2.19 correction factor for MW of iopentol (reported as such in plot). Dose digitized 1.2 gI/kg corresponding to 2.36 gI/kg of iopentol. Digitization yielded clearance within 20% of reported. No AUC available. Linear kinetics within range of doses. N =8, 74 kg average weight, infusion time 5.5 min	Completely excreted renally. Unchanged	1984	835.16	12	7	188.9	13	neutral	-2.2	-2.2
Iopromide	73334-07-3	COCC(=O)Nc1c(I)c(C(=O)NCC(O)CO)c(I)c(C(=O)N(C)CC(O)CO)c1I	0.22	1.4	0.99	2.6	2.6	Krause W, Schuhmann-Giampieri G, Staks T, and Kaufmann J (1994) Dose proportionality of iopromide pharmacokinetics and tolerability after IV injection in healthy volunteers. Eur. J. Clin. Pharmacol. 46: 339-343. Ultravist Product Label			1980	791.11	11	6	168.7	11	neutral	-2.2	-2.2
Iothalamic acid (Iothalamate)	2276-90-6	CNC(=O)c1c(I)c(NC(=O)C)c(I)c(C(=O)O)c1I	0.17	2.4	0.98	1.2	1.3	Back SE, Krutzen E, and Nilsson-Ehle P (1988) Contrast media as markers for glomerular filtration: a pharmacokinetic comparison of four agents. Scand. J. Clin. Lab Invest. 48: 247-253. Bollerup AC, Hesse B, and Steiness E (1975) Renal handling of iodamide and diatrizoate. Evidence of active tubular secretion of iodamide. Eur. J. Clin. Pharmacol. 9: 63-67.	VDss calculated from C vs t data obtained by digitization of the plot provided in the reference.		1964	613.91	6	3	95.5	3	anionic	1.4	-2
Iotrolan	79770-24-4	c1(c(c(c(I)c(c1I)C(N[C@@H]([C@@H](CO)O)CO)=O)C(N[C@@H]([C@@H](CO)O)CO)=O)I)N(C(CC(N(c1c(c(c(I)c(c1I)C(N[C@@H]([C@@H](CO)O)CO)=O)C(N[C@@H]([C@@H](CO)O)CO)=O)I)C)=O)=O)C	0.23	1.49	1	2.56	2.03	P. Scholz, H.-J. Weinmann, W. Mutzel, and T. Staks. Pharmacokinetics of lotrolan After Intravenous Injection into Healthy Volunteers. ortschritte auf dem Gebiete der Rontgenstrahlen und der Nuklearmedizin. Erganzungsband. 1989, 128, 211-214.//ppb: Mutzel W; Press W R; Weinmann H J. Physicochemical properties and general pharmacology of the nonionic dimer iotrolan. Fortschritte auf dem Gebiete der…	Data obtained after calculation from raw data reported in table 1. 650 mgI/kg used as dose (linear PK). N=3, 73 kg average weight. Clearance standardized to 1.73m2 in paper and clearance calculated in mL.min-1.kg-1 was multiplied by 70 kg (1.73 m2/70kg factor) to yield 104.46 mL.min-1 or 1.16 the reported 90 mL.min-1 clearance.	Nearly complete renal clearance	1981	1626.23	24	16	399.8	24	neutral	-5.8	-5.8
Ipratropium	60205-81-4	[H]OC[C@@H](C(=O)OC1C[C@@H]2CC[C@H](C1)[N+]2(C)C(C)C)c1ccccc1	5.1	31.4	0.95	2.7	1.64	Ensing K., de Zeeuw R.A., Nossent G.D., Koeter G.H, Cornelissen, P.J.G. et al. ( 1989) Pharmacokinetics of ipratropium bromide after single dose inhalation and oral and intravenous administration. Eur. J. Clin. Pharmacol. 36, 189-194. fu from Lombardo et al J. Clin. Pharmacol. 2013, 53(2), 167-177 and 178-191	N=10, 74 kg average weight VDss calculated as sum of Vc, Valpha and Vbeta reported. 2 mg/dose administered in 20'.		1962	332.46	4	1	46.5	7	neutral	-0.72	-0.72
Irbesartan	138402-11-6	CCCCC1=NC2(CCCC2)C(=O)N1Cc3ccc(cc3)c4ccccc4c5nnn[nH]5	0.94	2.3	0.1	6.8	14	Vachharajani NN, Shyu WC, Chando TJ, Everett DW, Greene DS, Barbhaiya RH (1998) Oral bioavailabiity and disposition characteristics of irbesartan, an angiotensin antagonist, in healthy volunteers. J. Clin. Pharmacol. 38: 702-707. Avalide Product Label.			1991	428.53	7	1	87.1	7	anionic	4.6	1.1
Irinotecan	97682-44-5	CCc1c2CN3C(=O)C4=C(C=C3c2nc5ccc(OC(=O)N6CCC(CC6)N7CCCCC7)cc15)[C@@](O)(CC)C(=O)OC4	3.5	7	0.51	8.3	9	Xie R, Mathijssen RHJ, Sparreboom A, Verweij J, and Karlsson MO (2002) Clinical pharmacokinetics of irinotecan and its metabolites in relation with diarrhea. Clin. Pharmacol. Ther. 72: 265-275. Camptosar Product Label.	No t1/2 reported from Xie, et al.		1985	586.68	10	1	112.5	5	cationic	4.3	2.4
Irofulven	158440-71-2	CC1=C(CO)C2=C(C)C3(CC3)[C@@](C)(O)C(=O)C2=C1	3.1	140		0.4	0.3	Paci A, Rezai K, Deroussent A, De Valeriola D, Re M, Weill S, Cvitkovic E, Kahatt C, Shah A, Waters S, Weems G, Vassal G, and Lokiec F (2006) Pharmacokinetics, metabolism, and routes of excretion of intravenous irofulven in patients with advanced solid tumors. Drug Met. Disp. 34: 1918-1926.			1994	246.3	3	2	57.5	1	neutral	1.4	1.4
Isavuconazole	241479-67-4	[H]O[C@](Cn1cncn1)(c1cc(ccc1F)F)[C@@H](C)c1nc(cs1)c1ccc(C#N)cc1	5.37	0.85	0.01	105.5	86.9	Schmitt-Hoffmann A. et al. Single-​ascending-​dose pharmacokinetics and safety of the novel broad-​spectrum antifungal triazole BAL4815 after intravenous infusions (50, 100, and 200 milligrams) and oral administrations (100, 200, and 400 milligrams) of its prodrug, BAL8557, in healthy volunteers. Antimicrobial Agents and Chemotherapy, 2006, 50(1), 279-285. //ppb: Robert W. Townsend,corresponding …	PK profiles refer to BAL4815 after iv infusion of prodrug BAL8557. BAL4815 = Isavuconazole Data from 50,100,200 mg equivalents of BAL4815 iv infusion (1 h) dose of prodrug BAL8557, N=18, 77.1(SD 10.4) average weight (57-100Kg). t½ taken as the β phase		1999	437.47	6	1	87.6	8	neutral	4	4
Isepamicin	58152-03-7	CN[C@@H]1[C@@H](O)[C@@H](O[C@@H]2[C@@H](O)[C@H](O[C@H]3O[C@H](CN)[C@@H](O)[C@H](O)[C@H]3O)[C@@H](N)C[C@H]2NC(=O)[C@@H](O)CN)OC[C@]1(C)O	0.32	1.3	0.95	4.1	24	Nomeir AA, Radwanski E, Cutler D, Affrime M, Christopher D, Korduba C, Batra V, Lin C, and Cayen MN (1997) Single-dose pharmacokinetics of isepamicin in young and geriatric volunteers. J. Clin. Pharmacol. 37: 1021-1030. Tod M, Padoin C, and Petitjean O (2000) Clinical pharmacokinetics and pharmacodynamics of isepamicin. Clin. Pharmacokinet. 38: 205-223.			1975	569.6	17	12	297.7	9	cationic	-8.7	-9
Isoglycirrhizinate (acid)	691410-17-0	[H]OC([C@@H]1[C@H]([C@@H]([C@H]([C@@H](O1)O[C@@H]1[C@H]([C@@H]([C@@H](C(=O)O[H])O[C@@H]1O[C@@H]1CC[C@@]2(C)C3C(C=C4[C@H]5C[C@@](C)(CC[C@@]5(C)CC[C@]4(C)[C@@]3(C)CC[C@@H]2C1(C)C)C(=O)O[H])=O)O[H])O[H])O[H])O[H])O[H])=O	0.09	0.05		30.9	23.1	Sun L. et al. Phase I safety and pharmacokinetic study of magnesium isoglycyrrhizinate after single and multiple intravenous doses in Chinese healthy volunteers. J. Clin.Pharmacol. 2007, 47, 767-773.	CAS number reported is the one of the Mg salt. 1405-86-3 for the acid. N=9, 63 kg average weight, 30' inf.; 100 mg dose. Dosed as magnesium salt. Data (VDss) verified by plot (100 mg dose) digitization and PK analysis via Phoenix.	The acid (as well as glycyrrhizine) was reported in 1880.The 2003 ref. was found for the Mg salt.	1880	822.93	16	8	267	15	anionic	1.5	-7.5
Isomazole	86315-52-8	[H]n1c2ccncc2nc1c1ccc(cc1OC)S(C)=O	1.67	20.7	0.48	1.3	1.2	Woodworth, James R.; Delong, A. F.; Fasola, A. F.; Oldham, S. Isomazole disposition in man as a function of dose and route of administration. Biopharm. Drug Disp. 1991, 12, 673-686.	fu = 0.48. N=9, 70 kg average weight assumed. 16.1 mg dose and 30' infusion. Data digitized from plots reported by Woodworth et al. Data normalized to middle dose as reported as average in the plot from multiple doses. Calculated data within 8% of reported. VDb = 1.82 L.kg-1 and AUCinf = 201 ng.hr.mL-1.		1983	287.34	5	1	67.9	3	neutral	1	1
Isoniazide	54-85-3	NNC(=O)c1ccncc1	0.82	7.4	1	1.8	1	Advenier C, St.Aubin A, Gobert C, Houin G, Albengres E, and Tillement JP (1980) Pharmacokinetics of isoniazid in the elderly. Br. J. Clin. Pharmacol. 10: 167-169. Kurz H, Mauser-Ganshorn A, and Stickel HH (1977) Differences in the binding of drugs to plasma proteins from newborn and adult man. I. Eur. J. Clin. Pharmacol. 11: 463-467.	VDss calculated from reported micro rate constants. CL and t1/2 are for fast acetylators. CL and t1/2 for slow acetylatore were 3.7 mL/min/kg and 3.1h, respectively.		1952	137.14	4	2	68	1	neutral	-1	-1
Isoproterenol	7683-59-2	CC(C)NCC(O)c1ccc(O)c(O)c1	1.5	56	0.71	0.43	0.41	Illi A, Sundberg S, Ojala-Karlsson P, Korhonen P, Scheinin M, and Gordin A (1995) The effect of entacapone on the disposition and hemodynamic effects of intravenous isoproterenol and epinephrine. Clin. Pharmacol. Ther. 58: 221-227. Sager G, Bratlid H, and Little C (1987) Binding of catecholamines to alpha-1 acid glycoprotein, albumin and lipoproteins in human serum. Biochem. Pharmacol. 36: 3607-3…	Pharmacokinetic parameters were calculated from C vs t data obtained by digitization of the plot provided in the reference.		1947	211.26	4	4	72.7	4	cationic	0.79	-0.8
Isosorbide Dinitrate	87-33-2	O=N(=O)O[C@H]1CO[C@@H]2[C@@H](CO[C@H]12)ON(=O)=O	1.9	31	0.72	1	1.7	Platzer R, Reutemann G, and Galeazzi RL (1982) Pharmacokinetics of intravenous isosorbide dinitrate. J. Pharmacokinet. Biopharm. 10: 575-586. Santoni Y, Iliadis A, Cano JP, Luccioni R, and Frances Y (1986) Pharmacokinetics of isosorbide dinitrate and its mononitrate metabolites after intravenous infusion. J. Pharmacokinet. Biopharm. 14: 1-17. Straehl P and Galeazzi RL (1985) Isosorbide dinitrate …			1939	236.14	10	0	128.6	4	neutral	0.82	0.82
Isosorbide-2-Mononitrate	16106-20-0	O[C@@H]1CO[C@@H]2[C@H](CO[C@H]12)ON(=O)=O	0.86	6.2		2.3	1.9	Straehl P, Galeazzi RL, and Soliva M (1984) Isosorbide 5-mononitrate and isosorbide 2-mononitrate kinetics after intravenous and oral dosing. Clin. Pharmacol. Ther. 36: 485-491.//			1967	191.14	7	1	93.7	2	neutral	-0.38	-0.38
Isosorbide-5-Mononitrate	16051-77-7	O[C@H]1CO[C@@H]2[C@@H](CO[C@H]12)ON(=O)=O	0.7	2	1	5.8	4.1	Major RM, Taylor T, Chasseaud LF, Darragh A, and Lambe RF (1984) Isosorbide 5-mononitrate kinetics. Clin. Pharmacol. Ther. 35: 653-659. Straehl P, Galeazzi RL, and Soliva M (1984) Isosorbide 5-mononitrate and isosorbide 2-mononitrate kinetics after intravenous and oral dosing. Clin. Pharmacol. Ther. 36: 485-491.			1967	191.14	7	1	93.7	2	neutral	-0.38	-0.38
Isoxicam	34552-84-6	CN1C(=C(O)c2ccccc2S1(=O)=O)C(=O)Nc3cc(C)on3	0.19	0.07	0.035	44	33	Kolle EU and Vollmer KO (1986) Pharmacokinetics of isoxicam following intravenous, intramuscular, oral and rectal administration in healthy volunteers. Br. J. Clin. Pharmacol. 22(Suppl 2): 135S-141S. Jolliet P, Simon N, Bree F, Urien S, Pagliara A, Carrupt PA, Testa B, and Tillement JP (1997) Blood-to-brain transfer of various oxicams: effects of plasma binding on their brain delivery. Pharm. Res…	VDss calculated from C vs t data obtained by digitization of plots in the reference.		1946	335.34	8	2	113	2	anionic	2.4	-0.77
Isradipine	75695-93-1	COC(=O)C1=C(C)NC(=C(C1c2cccc3nonc23)C(=O)OC(C)C)C	1.5	26	0.04	1	3.3	Christensen HR, Antonsen K, Simonsen K, Lindekar A, Bonde J, Angelo HR, and Kampmann JP (2000) Bioavailability and pharmacokinetics of isradipine after oral and intravenous administration: half-life shorter than expected? Pharmacol. Toxicol. 86: 178-182. Kirsten R, Nelson K, Kirsten D, and Heintz B (1988) Clinical pharmacokinetics of vasodilators. Part I. Clin. Pharmacokinet. 34: 457-482.	VDss was calculated from C vs t data obtained by digitization of the plot provided in the reference.		1980	371.39	8	1	103.8	6	neutral	3	3
Itraconazole	84625-61-6	CCC(C)N1N=CN(C1=O)c2ccc(cc2)N3CCN(CC3)c4ccc(OCC5COC(Cn6cncn6)(O5)c7ccc(Cl)cc7Cl)cc4	7.4	5.1	0.002	24	25	Heykants J, Van Peer A, Van de Velde V, Van Rooy P, Meuldermans W, Lavrijsen K, Woestenborghs R, Van Cutsem J, and Cauwenbergh G (1989) The clinical pharmacokinetics of itraconazole: an overview. Mycoses 32(Suppl 1): 67-87.	VDss was calculated from C vs t data obtained by digitization of the plot provided in the reference.		1983	705.63	12	0	100.8	11	neutral	5.8	5.8
Ivabradine	155974-00-8	N1(C(Cc2c(CC1)cc(c(c2)OC)OC)=O)CCC[N@@](C)C[C@@H]1c2cc(c(cc2C1)OC)OC	1.66	10.27	0.28	2.69		Ragueneau, Isabelle; Laveille, Christian; Jochemsen, Roeline; Resplandy, Guillemette; Funck-Brentano, Christian; Jaillon, Patrice. Pharmacokinetic-pharmacodynamic modeling of the effects of ivabradine, a direct sinus node inhibitor, on heart rate in healthy volunteers. Clin Pharmacol Ther 1998, 64, 192-203//ppb: https://www.accessdata.fda.gov/drugsatfda_docs/nda/2015/206143Orig1s000PharmR.pdf. Ac…	S-16257. N=18, 10 mg iv bolus, 70 kg average weight assumed. No t1/2 reported and MRT from VDss and clearance.		1993	468.59	7	0	60.5	10	cationic	3	1.8
IVL745	229627-58-1	COc1ccc(CN(CCC(=O)O)C(=O)CNC(=O)Cc2ccc(NC(=O)Nc3ccccc3C)c(OC)c2)cc1OC	0.25	11		0.38	1.6	Rohatagi S, Shah B, Zhang J, Zeng Z, Kirkesseli S, and Jensen BK (2004) Estimating mass balance for inhaled drugs in humans: An example with a VLA-4 antagonist, IVL745. J. Clin. Pharmacol. 44: 348-358.			1999	592.64	12	4	155.5	14	anionic	2.7	-0.014
Ixabepilone	219989-84-1	C[C@H]1CCC[C@@]2(C)O[C@H]2C[C@H](NC(=O)C[C@H](O)C(C)(C)C(=O)[C@H](C)[C@H]1O)\C(=C\c3csc(C)n3)\C	11	10	0.2	18	17	Abraham J, Agrawal M, Bakke S, Rutt A, Edgerly M, Balis FM, Widemann B, Davis L, Damle B, Sonnichsen D, Lebwohl D, Bates S, Kotz H, and Fojo T (2003) Phase I trial and pharmacokinetic study of BMS-247550, an epothilone B analog, administered intravenously on daily schedule for five days. J. Clin. Oncol. 21: 1866-1873.//ppb: Francis Y. F. Lee , Robert Borzilleri, Craig R. Fairchild, Amrita Kamath,…			1999	506.7	7	3	112	2	neutral	3.9	3.9
Ixazomib	1072833-77-2	CC(C)C[C@H](NC(=O)CNC(=O)c1cc(Cl)ccc1Cl)B(O)O	3.61	0.5	0.01	119	97	Assouline S E; Chang J; Cheson B D; Rifkin R; Hamburg S; Reyes R; Hui A-M; Yu J; Gupta N; Di Bacco A; Shou Y; Martin P. Phase 1 dose-​escalation study of IV ixazomib, an investigational proteasome inhibitor, in patients with relapsed​/refractory lymphoma. Blood Cancer Journal (2014) 4, e251; doi:10.1038/bcj.2014.71//ppb: Gupta, Neeraj; Hanley, Michael J.; Harvey, R. Donald; Badros, Ashraf; Lipe, …	MLN 2238. Data digitized from curve in Figure 1a. N=5, 3.11 mg/m2 dose. Only AUC 0-168h reported (1680 ng.hr/mL and calculated value was 1886 ng.hr/mL, corresponding to a ratio calculated/reported of 1.12). Cearance calculated with AUCinf (2547 ng.hr/mL or 25% extrapolation) and t1/2 essentially identical to reported value for Day 14 dosing. 2-fold accumulation observed.		2008	361.03	6	4	98.7	7	neutral	2.2	2.2
Kahalide F	149204-42-2	N1(C([C@@H](NC([C@@H](NC([C@@H](NC([C@@H](NC(=O)CCCC(C)C)C(C)C)=O)[C@H](O)C)=O)C(C)C)=O)C(C)C)=O)[C@@H](C(N[C@H](C(N[C@@H](C(N[C@@H]2C(N[C@@H](C(N[C@H](C(N[C@@H](Cc3ccccc3)C(N\C(C(N[C@H](C(O[C@@H]2C)=O)C(C)C)=O)=C/C)=O)=O)C(C)C)=O)[C@H](CC)C)=O)=O)[C@H](CC)C)=O)CCCN)=O)CCC1	0.11	3.9		0.48	0.57	Jeany M. Rademaker-Lakhai, Simon Horenblas,Willem Meinhardt, Ellen Stokvis,Theo M. de Reijke, Jose´ M. Jimeno,Luis Lopez-Lazaro, Jose´ A. Lopez Martin, Jos H. Beijnen, Jan H.M. Schellens.Phase I Clinical and Pharmacokinetic Study of Kahalalide F in Patients with Advanced Androgen Refractory Prostate Cancer. Clin Cancer Res. 2005, Vol. 11, 1854–1862.	Average weight taken as 70 kg. Weighted average of multiple doses. From 320 to 930 ug/m2/d. N=28 overall. MRT from VDss and clearance. Somewhat lower clearance and VDss at higher doses (> 560 ug/m2/d) but all averaged.		1993	1477.87	30	14	442.1	33	cationic	5.8	3.4
Kanamycin	59-01-8	NC[C@H]1O[C@H](O[C@@H]2[C@@H](N)C[C@@H](N)[C@H](O[C@H]3O[C@H](CO)[C@@H](O)[C@H](N)[C@H]3O)[C@H]2O)[C@H](O)[C@@H](O)[C@@H]1O	0.26	1.4	0.99	3.1	2.1	Kirby WMW, Clarke JT, Libke RD, and Regamey C (1976) Clinical pharmacology of amikacin and kanamycin. J. Infect. Dis. 134: S312-S315. Gordon RC, Regamey C, and Kirby WMM (1972) Serum protein binding of the aminoglycoside antibiotics. Antimic. Agents Chemother. 2: 214-216. Clarke JT, Libke RD, Regamey C, and Kirby WMM (1974) Comparative pharmacokinetics of amikacin and kanamycin. Clin. Pharmacol. …	VDss, CL not reported in Clarke paper but could be digitized.		1957	484.5	15	11	282.6	6	cationic	-7.9	-9
Ketamine	6740-88-1	CNC1(CCCCC1=O)c2ccccc2Cl	2.9	19	0.47	2.5	2.8	Geisslinger G, Hering W, Thomann P, Knoll R, Kamp HD, and Brune K (1993) Pharmacokinetics and pharmacodynamics of ketamine enantiomers in surgical patients using a stereoselective analytical method. Br. J. Anaesth. 70: 666-671. Pedraz JL, Lanao JM, Calvo MB, Muriel C, Hernandez-Arbeiza J, and Dominguez-Gil A (1987) Pharmacokinetic and clinical evaluation of ketamine administered by i.v. and epidu…	Racemate; data were combined.		1963	237.73	2	1	29.1	2	cationic	2.6	2.2
Ketanserin	74050-98-9	Fc1ccc(cc1)C(=O)C2CCN(CCN3C(=O)Nc4ccccc4C3=O)CC2	3.9	6.7	0.055	9.7	12	Heykants J, Van Peer A, Woestenborghs R, Gould S, and Mills J (1986) Pharmacokinetics of ketanserin and its metabolite ketanserin-ol in man after intravenous, intramuscular and oral administration. Eur. J. Clin. Pharmacol. 31: 343-350. Persson B, Pettersson A, and Hedner T (1987) Pharmacokinetics of ketanserin in patients wuith essential hypertension. Eur. J. Clin. Pharmacol. 32: 259-265. Trenk D…			1980	395.43	6	1	69.7	5	cationic	3.5	2.8
Ketobemidone	469-79-4	CCC(=O)C1(CCN(C)CC1)c2cccc(O)c2	0.48	9.2		0.87	2.3	Bondesson U, Arner S, Anderson P, Boreus LO, and Hartvig P (1980) Clinical pharmacokinetics and oral bioavailability of ketobemidone. Eur. J. Clin. Pharmacol. 17: 45-50.	Calculated from reported rate micro-constants.		1946	247.33	3	1	40.5	3	cationic	1.5	0.0027
Ketoprofen	22071-15-4	CC(C(=O)O)c1cccc(c1)C(=O)c2ccccc2	0.13	1.6	0.008	1.4	2.1	Debruyne D, de Ligny BH, Ryckelynck JP, Albessard F, and Moulin M (1987) Clinical pharmacokinetics of ketoprofen after single intravenous administration as a bolus or infusion. Clin. Pharmacokinet. 12: 214-221. Lee KJ, Mower R, Hollenbeck T, Castelo J, Johnson N, Gordon P, Sinko PJ, Holme K, and Lee YH (2003) Modulation of nonspecific binding in ultrafiltration protein binding studies. Pharm. Res…			1968	254.28	3	1	54.4	4	anionic	2.9	-0.072
Ketorolac	74103-06-3	OC(=O)C1CCn2c1ccc2C(=O)c3ccccc3	0.11	0.35	0.0068	5.2	5.1	Jung D, Mroszczak E, and Bynum L (1988) Pharmacokinetics of ketorolac tromethamine in humans after intravenous, intramuscular and oral administration. Eur. J. Clin. Pharmacol. 35: 423-425. Reed MD, Myers CM, and Blumer JL (2001) Influence of midazolam on the protein binding of ketorolac. Curr. Ther. Res. 62: 558-565. Mroszczak EJ, Lee FM, Combs D, Sarnquist FH, Huang BL, Wu AT, Tokes LG, Maddox M…			1978	255.27	4	1	59.3	3	anionic	2.5	-0.76
KNI-272	147318-81-8	c12c(cccc1cncc2)OCC(N[C@H](C(N[C@H]([C@@H](C(N1[C@@H](CSC1)C(NC(C)(C)C)=O)=O)O)Cc1ccccc1)=O)CSC)=O	0.11	10.5		0.17	0.44	BRIGITTA U. MUELLER, BARRY D. ANDERSON, MAUREEN Q. FARLEY, ROBERT MURPHY, JUDY ZUCKERMAN, PAUL JAROSINSKI, KAREN GODWIN, CINDY L. MCCULLY, HIROAKI MITSUYA, PHILIP A. PIZZO, FRANK M. BALIS. Pharmacokinetics of the Protease Inhibitor KNI-272 in Plasma and Cerebrospinal Fluid in Nonhuman Primates after Intravenous Dosing and in Human Immunodeficiency Virus-Infected Children after Intravenous and Ora…	Kynostatin 272. Dosed to children at 200 mg/m2 to children. Median age 9.7 years, N=5 from data in table 2. MRT from VDss and clearance.		1992	667.84	11	4	150	13	neutral	2	1.9
KRN-5500	151276-95-8	CCCCCCCCC\C=C\C=C\C(=O)NCC(=O)N[C@@H]1[C@@H](O)[C@@H](O)[C@@H](Nc2[nH]cnc3ncnc23)O[C@H]1[C@@H](O)CO	0.17	2.7		1.1	1.3	Supko JG, Eder JP, Ryan DP, Seiden MV, Lynch TJ, Amrein PC, Kufe DW, and Clark JW (2003) Phase I clinical trial and pharmacokinetic study of the spicamycin analog KRN5500 administered as a 1-hour intravenous infusion for five consecutive days to patients with refractory solid tumors. Clin. Canc. Res. 9: 5178-5186.			1993	589.68	14	8	214.8	17	neutral	1.3	1.2
KRN8602	105026-50-4	c1c(c2c(cc1)C(=O)c1c(c(O)c3c(c1O)[C@@H](O)[C@@](O)(CC)C[C@@H]3O[C@@H]1C[C@@H]([C@@H]([C@@H](O1)C)O)N1CCOCC1)C2=O)O	20.9	42.8	0.09	8	10.7	Kerrie Clarke, Russell L. Basser, Darryl Maher, Denis J. Morgan, Jonathan Cebon, Richard M. Fox, John S. Hill, Carole Alt, Jane Bartlett, Howard Geldard, Andrew H. Kaye, and Michael D. Green. Phase I and Pharmacokinetic Study of KRN8602 Alone and With Filgrastim in Patients With Advanced Cancer. J Clin Oncol. 1998, 16:2181-2187.	Weighted average of 27 patients receiving KRN 8062 only. 10-50 mg/m2 dose range. 70-kg weight assumed. AUC units not reported. CAS of HCl salt.		1986	585.6	12	6	186.4	4	neutral	1.4	1.2
KW-2170	207862-44-0	NCCCNc1ccc2c(CNCCO)nn3c4c(O)ccc(O)c4C(=O)c1c23	12	18		11	32	Saeki T, Eguchi K, Takashima S, Sugiura T, Hida T, Horikoshi N, Aiba K, Kuwabara T, and Ogawa M (2004) Phase I and pharmacokinetic study of KW-2170, a novel pyrazoloacridone compound, in patients with malignant tumors. Cancer Chemother. Pharmacol. 54: 459-468.			1998	397.43	9	6	145.7	8	cationic	-0.21	-3.6
KW-2478	819812-04-9	CCc1c(cc(c(c1CC(=O)N(CCOC)CCOC)C(=O)c2ccc(c(c2)OC)OCCN3CCOCC3)O)O	1.32	6.87		3.21	5.94	K Yong, J Cavet, P Johnson, G Morgan, C Williams, D Nakashima, S Akinaga, H Oakervee and J Cavenagh. Phase I study of KW-2478, a novel Hsp90 inhibitor, in patients with B-cell malignancies. Br. J. Cancer, 2016, 114, 7-13.	Data digitized across 4 doses (14, 99, 132, 176 mg/m2) and simultaneously fit via Phoenix. Then data weight-averaged by number of subjects. As an example, reported AUCinf 992 and 11501 ng.hr.mL-1 at 14 and 176 mg/m2. Calculated 970 and 11351 ng.hr.mL-1 at the same doses. Doses (N)in mg/m2: 14 (3), 99 (3), 132 (6), 176 (6). 1.73m2/70 conersion factor used. May have resulted in slightly different c…		2005	574.66	11	2	127.2	16	neutral	1.9	1.6
L-5-hydroxytryptophan	4350-09-8	c1cc2c(cc1O)c(c[nH]2)C[C@@H](C(=O)O)N	0.8	1.72		7.75	6.14	Magnussen, I.; Nielsen-Kudsk, F. Pharmacokinetics of intravenously administered L-5-hydroxytryptophan in man. Acta Pharmacologica et Toxicologica (1979), 44(4), 308-14.	Oxyfan. Oxitriptan. CAS number and structure referring to L form. DL form reported with CAS # 56-69-9. N=5, 0.2 mg/kg, 67 kg average weight. VDss calculated from Vc and k12,k21. MRT from VDss and clearance. Clearance reported as 105.5 mL.min-1.kg-1 but ACTUAL value (dose of 0.98 umol/kg over AUC) shows a value of 1.72. reported value likely to be in mL.h-1.kg-1.		1954	220.22	5	4	99.3	3	zwitterionic	0.033	-1.6
L-648051	91541-18-3	S(c1ccc(C(=O)CCC(=O)O)cc1)(=O)(=O)CCCOc1c(c(O)c(cc1)C(=O)C)CCC		17.44			0.04	Biollaz, J.; Stahl, E.; Hsieh, J. Y.; Distlerath, L.; Jaeger, A.; Leuenberger, P.; Schelling, J. L.. Tolerability and pharmacokinetics of L 648051. A leukotriene D4-receptor antagonist, in healthy volunteers. Eur. J. Clin. Pharmacol. (1988), 33(6), 603-607.	N=3, 68.8 kg, 5 minutes infusion. Average across doses (35-72 mg total). VD refers to Vdbeta and only individual plots (difficult to digitized) were reported.		1984	476.54	8	2	135	13	anionic	2.7	0.13
L-692429	145455-23-8	[H]N(C(CC(C)(C)N([H])[H])=O)[C@@H]1CCc2ccccc2N(Cc2ccc(cc2)c2ccccc2c2nnnn2[H])C1=O	0.2	3.05	0.06	1.1	3.8	Gertz B J; Barrett J S; Eisenhandler R; Krupa D A; Wittreich J M; Seibold J R; Schneider S H Growth hormone response in man to L-​692,​429, a novel nonpeptide mimic of growth hormone-​releasing peptide-​6. J. Clin. Endocrin. Metab. 1993, 77, 1393-1397. ppb: K H Leung, D A Cohn, R R Miller, G A Doss, R A Stearns, R E Simpson, W P Feeney and S H Chiu Pharmacokinetics and disposition of L-692,429. A…	MK 0751. Data from 1.0 mg/kg dose (others administered) N=6. 70 kg average weight assumed.		1992	509.6	9	3	129.9	8	zwitterionic	4.1	1.8
L-778,123	183499-57-2	c1cc(cc(c1)Cl)N2CCN(CC2=O)Cc3cncn3Cc4ccc(cc4)C#N	0.8	3.2		4.2	2.6	Carolyn D. Britten, Eric K. Rowinsky, Steven Soignet, Amita Patnaik, Siu-Long Yao, Paul Deutsch, Yih Lee, Robert B. Lobell, Kathryn E. Mazina, Heather McCreery, Sandy Pezzuli and David Spriggs. A Phase I and Pharmacological Study of the Farnesyl Protein Transferase Inhibitor L-778,123 in Patients with Solid Malignancies. Clinical Cancer Research, 2001, 7, 3894-3903	Data digitized from plot reported for one representative subject, 168 hr infusion at 560 mg/m2/day. Average AUC reported 1310 uM.hr +/- 563, clearance reported as 130.8 +/- 41.6 ml/min/m2. Values estimated from loading dose assuming 4-5*t1/2 for steady state (10-13 hrs) and VDss estimated from loading dose (calculated as 303 mg/m2) /Css (reported). Clearance and t1/2 reported, MRT from VDss and c…		1996	405.88	6	0	65.2	6	neutral	2.6	2.6
Labetalol	36894-69-6	CC(CCc1ccccc1)NCC(O)c2ccc(O)c(c2)C(=O)N	4.8	23	0.5	3.5	4.4	Cheymol G, Poirier JM, Carrupt PA, Testa B, Weissenburger J, Levron JC, and Snoeck E (1997) Pharmacokinetics of .beta.-adrenoceptor blockers in obese and normal volunteers. Br. J. Clin. Pharmacol. 43: 563-570. Martin LE, Hopkins R, and Bland R (1976) Metabolism of labetalol by animals and man. Br. J. Clin. Pharmacol. (Supp): 695-710			1972	328.41	5	4	95.6	8	cationic	1.8	0.97
Lacosamide	175481-36-4	C(=O)([C@@H](COC)NC(=O)C)NCc1ccccc1	0.58	0.57	0.85	17.2	12.3	Bioequivalence of Intravenous and Oral Formulations of the Antiepileptic Drug Lacosamide. Willi Cawello, Rainer Bonn, Hilmar Boekens. Pharmacology 2012;90:40-46 . ppb: < 15% as reported by PDR. http://www.pdr3d.com/detail.php?c=130625#section-14. Accessed December 30 2014.	Data after 200 mg 15 min infusion (N=16, mean BW = 77.3 kg) digitized from Fig 1 reported in Willi Cawello, Rainer Bonn, Hilmar Boekens. Bioequivalence of Intravenous and Oral Formulations of the Antiepileptic Drug Lacosamide Pharmacology 2012, 90, 40–46. Reported data: AUC(0–t), h*µg/ml 72.33 (±17.4), AUC(0–inf), h*µg/ml 75.40 (±17.0), T1/2, h 12.6, Calculated data, AUCINF_obs h*ug/mL 76.41		1996	250.29	5	2	67.4	6	neutral	-0.2	-0.2
Ladirubicin	171047-47-5	C[C@H]1[C@H]([C@H](C[C@@H](O1)O[C@H]2C[C@@](Cc3c2c(c4c(c3O)C(=O)c5ccccc5C4=O)O)(C(=O)C)O)N6CC6)OS(=O)(=O)C	2.95	23.54	0.006	2.09	7.33	de Jonge, M. J. A.; Verweij, J.; van der Gaast, A.; Valota, O.; Mora, O.; Planting, A. S. Th.; Mantel, M. A.; Van Den Bosch, S.; Lechuga, M. J.; Fiorentini, F.; Hess, D; Sessa, C. Phase I and pharmacokinetic studies of PNU-159548, a novel alkycycline, administered intravenously to patients with advanced solid tumours. Eur. J. Cancer 2002, 38, 2407-2415.	PNU 159548. FCE28729. Weighted average of doses between 1 and 16 mg.m-2 with data only from 10' infusion. Data from 1 hr infusion not reported for VDss (only clearance) and not used. Total N=49 across dose. MRT from VDss and clearance.		1995	601.62	12	3	176.7	6	neutral	1.5	1.4
Lamifiban	144412-49-7	NC(=N)c1ccc(cc1)C(=O)N[C@@H](Cc2ccc(O)cc2)C(=O)N3CCC(CC3)OCC(=O)O	0.29	1.9	0.94	2.5	2.1	Lave T, Saner A, Coassolo P, Brandt R, Schmitt-Hoffmann AH, and Chou RC (1996) Animal pharmacokinetics and interspecies scaling from animals to man of lamifiban, a new platelet aggergeation inhibitor. J. Pharm. Pharmacol. 48: 573-577.			1992	468.5	10	5	166	9	zwitterionic	0.93	-0.3
Lamivudine	134678-17-4	NC1=NC(=O)N(C=C1)[C@@H]2CS[C@H](CO)O2	1.3	4.8	0.94	4.4	9.1	Yuen GJ, Morris DM, Mydlow PK, Haidar S, Hall ST, and Hussey EK (1995) Pharmacokinetics, absolute bioavailability, and absorption characteristics of lamivudine. J. Clin. Pharmacol. 35: 1174-1180. Takubo T, Hirayama S, Moriya T, Minamide Y, Kato T, Nakamura R, and Kinami J (1997) Studies on the metabolic fate of lamivudine (II): tissue distribution, transfer into fetus and milk, plasma protein bin…			1991	229.26	6	2	88.1	2	neutral	-1	-1
Lanicemine	153322-05-5	c1ccc(cc1)C(Cc2ccccn2)N	1.62	1.8		15.06	10.4	Khanh H. Bui, Diansong Zhou, Felix Agbo, and Jian Guo. Effect of Multiple Intravenous Doses of Lanicemine (AZD6765) on the Pharmacokinetics of Midazolam in Healthy Subjects. J. Clin. Pharmacol. 2015, 55(9) 1024–1030.	AZD6765. N=46, 75.1kg average weight1 hr infusion of 150 mg of lanicemine. MRT from clearance and MRT. See also, Guo J, Zhou D, Grimm SW, Bui KH. Pharmacokinetics,metabolism and excretion of [(14)C]-lanicemine (AZD6765), a novel low-trapping N-methyl-d-aspartic acid receptor channel blocker, in healthy subjects. Xenobiotica. 2015;45(3):244– 255.		1993	198.26	2	1	38.9	3	cationic	1.6	0.31
Laniquidar	197509-46-9	COC(c1cnc2C(=C3CCN(CC3)CCc3ccc(cc3)OCc3ccc4ccccc4n3)c3ccccc3CCn12)=O	6.03	14.14	0.001	7.1	10.6	De Buck, Stefan S.; Sinha, Vikash K.; Fenu, Luca A.; Nijsen, Marjoleen J.; Mackie, Claire E.; Gilissen, Ron A. H. J. Prediction of human pharmacokinetics using physiologically based modeling: a retrospective analysis of 26 clinically tested drugs. Drug Metabolism and Disposition, 2007, 35(10), 1766-1780.	70 kg average weight assumed. MRT calculated from CL and VDss. 50 mg iv dose		1997	584.71	7	0	69.5	8	cationic	7.4	6.8
Lanreotide	108736-35-2	c1(c2c(cccc2)[nH]c1)C[C@@H]1NC(=O)[C@@H](Cc2ccc(O)cc2)NC([C@@H](CSSC[C@@H](NC([C@@H](NC([C@@H](NC1=O)CCCCN)=O)C(C)C)=O)C(N[C@@H]([C@@H](C)O)C(=O)N)=O)NC(=O)[C@@H](N)Cc1ccc2c(c1)cccc2)=O	0.2	5.7		0.57	1.03	Pharmacokinetic profile of the somatostatin analogue lanreotide in individuals with chronic hepatic insufficiency. Tomlinson B, Thomas NG, Lan IW, Barbanoj M, Antonijoan RM, Drazna E, Ramis J, Obach R, Peraire C. Clin. Pharmacokinet. 2006, 45, 1003-1011.	N=23 healthy volunteers; 7 ug/kg in 20' infusion. Microdose?		1987	1096.32	21	13	355.1	17	cationic	1.3	-2.3
Lansoprazole	103577-45-3	Cc1c(OCC(F)(F)F)ccnc1CS(=O)c2nc3ccccc3[nH]2	0.28	4.4	0.021	1.1	1	Gerloff J, Mignot A, Barth H, and Heintze K (1996) Pharmacokinetics and absolute bioavailability of lansoprazole. Eur. J. Clin. Pharmacol. 50: 293-297. Freston JW, Pilmer BL, Chiu YL, Wang Q, Stolle JC, Griffin JS, and Lee CQ (2004) Evaluation of the pharmacokinetics and pharmacodynamics of intravenous lansoprazole. Alimentary Pharmacol. Ther. 19: 1111-1122. Karol MD, Machinist JM, and Cavanaugh …			1986	369.36	5	1	67.9	5	neutral	2.5	2.4
Laromustine	173424-77-6	CS(=O)(=O)[N@@](N(S(=O)(=O)C)C(=O)NC)CCCl	0.88	23.1		0.63	0.49	A Phase I and Pharmacokinetic Study of VNP40101M, a Novel Sulfonylhydrazine Alkylating Agent, in Patients with Refractory LeukemiaFrancis Giles, Deborah Thomas,Guillermo Garcia-Manero, Stefan Faderl,Jorge Cortes, Srdan Verstovsek, Alessandra Ferrajoli,Sima Jeha,Miloslav Beran, Charles Koller, Michael Andreeff, Ann Cahill,Caroline Clairmont, Mario Sznol, and Hagop Kantarjian Cli. Cancer Res. 2004 …	VNP40101M or cloretazine. Dose range from 220 to 708 ,g/m2. Weighted average across number of courses for each dose. MRT calculated from VDss and clearance reported. Variable infusion time (15-70 minutes)		1996	307.78	8	1	103.9	5	neutral	-1.4	-1.4
[truncated: 648 more rows]
